# Supplementary material for: A rapid method for methanol quantification in spirits using UV-visible spectroscopy and FTIR
Source: PeerJ journal article supplement (doi:10.7717/peerj-achem.35), 2025-04-14
Supplement: Raw_Data.xlsx [file Raw_Data.xlsx]

## Sheet: PCA_HID
0.909402	-0.411709
0.913803	-0.402246
0.918514	-0.391397
0.924826	-0.376341
0.933864	-0.353288
0.943062	-0.32769
0.951574	-0.3015
0.962123	-0.264926
0.973818	-0.216654
0.984597	-0.158957
0.993206	-0.0880271
0.997021	-0.00609079
0.993602	0.0805808
0.982088	0.165152
0.963733	0.24186
0.939652	0.31017
0.909388	0.37226
0.866481	0.440378
0.788471	0.535106
0.605093	0.678772
0.0954902	0.817391
-0.615976	0.607062
-0.884799	0.329564
-0.953658	0.193069
-0.975633	0.12721
-0.984597	0.0919327
-0.988924	0.0711716
-0.991327	0.0574915
-0.992768	0.0468594
-0.993625	0.0371011
-0.994041	0.0276638
-0.994039	0.0188741
-0.993737	0.0112282
-0.993364	0.00482778
-0.993045	-0.000303504
-0.99282	-0.00372698
-0.992802	-0.00525113
-0.993094	-0.00500318
-0.993583	-0.00343108
-0.994086	-0.000234538
-0.994656	0.00533965
-0.995329	0.013028
-0.995801	0.0241732
-0.995818	0.0382086
-0.995529	0.0499733
-0.995263	0.0561498
-0.995169	0.057508
-0.995201	0.0554491
-0.995205	0.0504461
-0.994877	0.0434527
-0.993795	0.0370296
-0.991785	0.0361474
-0.989349	0.0487964
-0.986676	0.0847836
-0.980048	0.153324
-0.957525	0.259239
-0.900915	0.395654
-0.799294	0.542446
-0.656063	0.680738
-0.479873	0.799469
-0.284755	0.887119
-0.0929618	0.935591
0.0766632	0.949688
0.219294	0.941902
0.337917	0.92122
0.432263	0.892563
0.49999	0.861867
0.543627	0.835093
0.570267	0.814729
0.588459	0.799318
0.606681	0.784407
0.631963	0.764293
0.667891	0.73395
0.714179	0.69003
0.766992	0.632032
0.820284	0.562906
0.869144	0.486153
0.910831	0.404391
0.943776	0.321404
0.967265	0.242893
0.982486	0.172206
0.991548	0.110419
0.996204	0.0571578
0.997726	0.0107561
0.997347	-0.0278345
0.995925	-0.0609788
0.993549	-0.0926134
0.990551	-0.121931
0.987347	-0.147054
0.984305	-0.166077
0.981361	-0.181296
0.977914	-0.198216
0.973829	-0.21701
0.970235	-0.232189
0.968091	-0.241056
0.966396	-0.248077
0.964266	-0.256257
0.962108	-0.263805

## Sheet: PCA_HID1
-12.7375	-0.385189
-8.81081	2.57211
-12.8248	-0.385837
-12.6305	-0.446568
-12.4794	-0.32067
-12.6267	-0.256686
-12.7911	-0.947488
-12.2863	0.104943
-11.2032	0.338301
-11.7586	1.11088
-14.3944	-0.47835
6.28916	19.0593
-14.2799	-0.119217
-13.476	0.203086
-12.9341	1.85757
-11.3608	3.63337
-9.72685	5.44297
5.77545	-3.95712
5.32712	-3.82471
5.10542	-3.78469
4.84173	-3.60185
4.8169	-3.49627
4.3703	-3.37514
4.17285	-3.25543
3.87597	-3.0704
3.50065	-2.99402
3.32034	-2.95509
3.03733	-2.94174
2.48056	-2.75581
2.12122	-2.47332
2.01449	-2.37307
5.90858	-4.10301
5.57278	-3.96918
6.86399	-1.9282
7.00029	-1.13405
7.23032	-0.49229
7.42001	0.140088
7.67652	1.00472
7.94779	1.59565
8.14001	2.34288
8.15406	2.70443
8.57315	3.71247
8.73202	4.61
8.99873	5.72383
9.13876	6.35444
9.40606	7.61307
5.85099	-4.15338
6.19086	-3.41724
6.46644	-2.72811

## Sheet: PCA_HID2
0.643045	-0.291122
0.646156	-0.284431
0.649488	-0.27676
0.65395	-0.266113
0.660341	-0.249812
0.666846	-0.231711
0.672864	-0.213193
0.680324	-0.187331
0.688593	-0.153198
0.696215	-0.1124
0.702303	-0.0622445
0.705	-0.00430684
0.702583	0.0569792
0.694441	0.11678
0.681462	0.171021
0.664435	0.219324
0.643034	0.263228
0.612695	0.311394
0.557533	0.378377
0.427865	0.479964
0.0675218	0.577982
-0.435561	0.429258
-0.625647	0.233037
-0.674338	0.136521
-0.689877	0.089951
-0.696215	0.0650062
-0.699275	0.0503259
-0.700974	0.0406526
-0.701993	0.0331346
-0.702599	0.0262345
-0.702893	0.0195613
-0.702891	0.013346
-0.702678	0.00793955
-0.702415	0.00341375
-0.702189	-0.00021461
-0.70203	-0.00263537
-0.702017	-0.00371311
-0.702224	-0.00353779
-0.70257	-0.00242614
-0.702925	-0.000165843
-0.703328	0.0037757
-0.703804	0.00921221
-0.704138	0.0170931
-0.70415	0.0270176
-0.703945	0.0353364
-0.703757	0.0397039
-0.703691	0.0406643
-0.703713	0.0392084
-0.703716	0.0356708
-0.703484	0.0307257
-0.702719	0.0261839
-0.701298	0.0255601
-0.699575	0.0345043
-0.697685	0.059951
-0.692999	0.108417
-0.677073	0.18331
-0.637043	0.27977
-0.565186	0.383567
-0.463907	0.481354
-0.339321	0.56531
-0.201352	0.627288
-0.0657339	0.661563
0.0542091	0.671531
0.155064	0.666026
0.238944	0.651401
0.305656	0.631137
0.353547	0.609432
0.384402	0.5905
0.40324	0.576101
0.416103	0.565203
0.428988	0.554659
0.446865	0.540437
0.47227	0.518981
0.505001	0.487925
0.542345	0.446914
0.580029	0.398035
0.614578	0.343762
0.644055	0.285948
0.66735	0.227267
0.683959	0.171752
0.694723	0.121768
0.701131	0.0780777
0.704422	0.0404166
0.705499	0.00760571
0.705231	-0.019682
0.704225	-0.0431185
0.702545	-0.0654875
0.700425	-0.0862182
0.69816	-0.103983
0.696009	-0.117434
0.693927	-0.128196
0.691489	-0.14016
0.688601	-0.153449
0.68606	-0.164182
0.684544	-0.170452
0.683345	-0.175417
0.681839	-0.181201
0.680313	-0.186539
-1.44009	-0.0930242
-0.996141	0.62117
-1.44996	-0.0931807
-1.42799	-0.107847
-1.4109	-0.0774427
-1.42756	-0.0619903
-1.44615	-0.228821
-1.38908	0.0253441
-1.26662	0.0817005
-1.32941	0.26828
-1.62742	-0.115523
0.711046	4.60288
-1.61447	-0.0287912
-1.52358	0.0490458
-1.46232	0.448608
-1.28444	0.877468
-1.09971	1.31449
0.652967	-0.955654
0.60228	-0.923678
0.577213	-0.914012
0.547401	-0.869856
0.544594	-0.844357
0.494102	-0.815104
0.471778	-0.786194
0.438214	-0.74151
0.395781	-0.723064
0.375394	-0.713663
0.343397	-0.710437
0.28045	-0.665535
0.239823	-0.597314
0.227757	-0.573104
0.668018	-0.990889
0.630053	-0.958567
0.776037	-0.465665
0.791446	-0.273875
0.817453	-0.118889
0.838899	0.0338317
0.8679	0.242642
0.89857	0.385353
0.920301	0.565813
0.921891	0.653126
0.969272	0.896572
0.987233	1.11333
1.01739	1.38232
1.03322	1.53461
1.06344	1.83858
0.661508	-1.00305
0.699932	-0.825271
0.73109	-0.658844

## Sheet: Fig.10 Data
	Met 0%	Met 100%	Met 1%	EtH 7%	EtH 21%	EtH 5%	Met 5%	Heads 17	Heads 10	Heads 12	Heads 14	Heads 15	Heads 2	Heads 3	Heads 6
1150.67	0.0241803	0.0249012	0.0244875	0.043303	0.0426101	0.0434906	0.0430999	0.0295428	0.0286756	0.0287577	0.0286902	0.0286867	0.0301976	0.0295551	0.0288311
1148.61	0.0244004	0.0257939	0.025046	0.0435735	0.0427009	0.0433895	0.0433221	0.0295621	0.0289239	0.028987	0.0288341	0.0288805	0.0304462	0.0297046	0.0289706
1146.55	0.0249195	0.0267341	0.0257142	0.0436612	0.0426014	0.0433737	0.0435031	0.0297262	0.0291991	0.0292624	0.0289781	0.0293399	0.0308032	0.0299401	0.0292605
1144.49	0.0254327	0.0278565	0.0260269	0.0435887	0.0424896	0.0436426	0.0436342	0.0302672	0.0294319	0.0296114	0.0293024	0.029865	0.0312145	0.0303272	0.0298072
1142.43	0.0257647	0.0292931	0.0261398	0.0435484	0.0427193	0.0438834	0.0436015	0.0308507	0.0296776	0.0299632	0.0297403	0.0302636	0.0317326	0.0307607	0.0303938
1140.38	0.0261229	0.0308304	0.026499	0.0436154	0.0431122	0.0438838	0.043623	0.0312382	0.030121	0.0304186	0.0303905	0.0307507	0.0323554	0.031182	0.030803
1138.32	0.0267356	0.0324229	0.0272392	0.0437744	0.0434029	0.0439358	0.0438092	0.0316755	0.03089	0.0311022	0.0312601	0.0313816	0.0329702	0.0316689	0.0310101
1136.26	0.0275473	0.0343503	0.0281542	0.043955	0.0436172	0.0441238	0.0440271	0.0323619	0.0317643	0.0319011	0.0320737	0.0319491	0.0335665	0.0324077	0.0313704
1134.2	0.028468	0.0366314	0.0289551	0.0441922	0.0438144	0.0443274	0.0442851	0.0333021	0.0324714	0.032713	0.0327323	0.0325845	0.0342771	0.0333149	0.0321969
1132.14	0.0295531	0.0392277	0.029639	0.0444941	0.0441012	0.044553	0.0443568	0.0342591	0.0331868	0.0333872	0.0333402	0.0333883	0.0350558	0.0341621	0.0331829
1130.08	0.0306607	0.0420564	0.0304422	0.0448442	0.0444217	0.0447566	0.044325	0.0349747	0.034006	0.0338678	0.0341795	0.0340858	0.0357422	0.0350737	0.034169
1128.03	0.0315511	0.0448467	0.0314495	0.0452642	0.0447166	0.0448899	0.044639	0.0355287	0.0347194	0.0344611	0.035113	0.0346833	0.0363133	0.0360036	0.0351099
1125.97	0.0324051	0.0475966	0.0325721	0.0456441	0.0450422	0.0450696	0.0451397	0.0360632	0.0353339	0.0352661	0.0358005	0.0353608	0.036779	0.0366433	0.0357476
1123.91	0.0333765	0.0502994	0.0336194	0.045969	0.0454779	0.0453844	0.0454769	0.0364926	0.0359806	0.0360519	0.0363466	0.0360018	0.0373008	0.0371354	0.0362537
1121.85	0.0344637	0.0525749	0.0346052	0.046358	0.0459755	0.0457968	0.0456855	0.0369788	0.036555	0.0367333	0.0368194	0.0366375	0.0380181	0.0378361	0.0369381
1119.79	0.0358718	0.0541547	0.0358408	0.0466292	0.0462548	0.046231	0.0459915	0.0378121	0.0371819	0.037379	0.0375487	0.0374583	0.0387636	0.0386803	0.0377964
1117.73	0.0375563	0.0550822	0.037465	0.0466216	0.0463946	0.0466031	0.0463624	0.0388732	0.0381755	0.0382246	0.0387955	0.0385056	0.0396099	0.0395871	0.0387992
1115.67	0.0394553	0.055639	0.0396622	0.0466601	0.0466008	0.0468727	0.0465335	0.0401861	0.0396874	0.0396682	0.0402913	0.0399103	0.0409398	0.0408567	0.0402882
1113.62	0.0418807	0.0558879	0.0426098	0.0469631	0.0468244	0.0470487	0.0466222	0.0420684	0.041855	0.0418659	0.0422555	0.0418817	0.0428361	0.0426554	0.0425445
1111.56	0.0453189	0.0555952	0.0463939	0.0472697	0.0471032	0.0471289	0.0468193	0.0447397	0.0446916	0.0447641	0.0451666	0.0446608	0.0454065	0.0451718	0.0454836
1109.5	0.0504099	0.0546354	0.0515394	0.0473231	0.0474488	0.0470984	0.0468962	0.0484478	0.0485086	0.048707	0.0491886	0.0485427	0.0491423	0.0488337	0.0492859
1107.44	0.0575888	0.0530197	0.0585948	0.0472105	0.0479236	0.0470326	0.0468231	0.0536959	0.0539295	0.054345	0.0546386	0.0539444	0.0543707	0.0539256	0.0544978
1105.38	0.0671016	0.0512189	0.067941	0.0471746	0.0486335	0.0472067	0.0468939	0.060982	0.0614971	0.0620447	0.0620035	0.0615648	0.0614478	0.060955	0.0619103
1103.32	0.0795772	0.0495956	0.0804557	0.0473281	0.0496358	0.0475609	0.0471428	0.0708229	0.0719362	0.0723405	0.0720873	0.0721325	0.0710348	0.070794	0.0723755
1101.27	0.0962665	0.0480245	0.0971802	0.0477367	0.051211	0.0476739	0.0473946	0.0840204	0.0859966	0.0862717	0.0860077	0.086199	0.083703	0.0841333	0.0864596
1099.21	0.118093	0.046526	0.1186	0.048423	0.0535108	0.0477269	0.0475798	0.101253	0.104028	0.104422	0.104324	0.104159	0.100054	0.101404	0.104521
1097.15	0.14442	0.0451044	0.144522	0.0493681	0.0564053	0.0481937	0.0479385	0.122437	0.125754	0.126341	0.126515	0.125941	0.120253	0.12249	0.126423
1095.09	0.173015	0.0437916	0.173179	0.0506375	0.0598982	0.0489715	0.0487877	0.146158	0.149896	0.150608	0.150894	0.150278	0.143017	0.145993	0.150866
1093.03	0.200601	0.0426144	0.20086	0.0520397	0.0641488	0.0497466	0.0499487	0.169729	0.173855	0.174643	0.174912	0.174351	0.165581	0.169177	0.175149
1090.97	0.223297	0.0415616	0.223302	0.0533425	0.0687909	0.0506555	0.0509629	0.189703	0.194082	0.194891	0.195375	0.194569	0.18459	0.188664	0.195519
1088.91	0.237283	0.0407154	0.236749	0.0544982	0.0727725	0.0517204	0.0517354	0.202727	0.207294	0.208062	0.208764	0.207646	0.197364	0.201575	0.208483
1086.86	0.240505	0.0400146	0.239167	0.0552111	0.075289	0.0524448	0.0523183	0.206828	0.211657	0.212264	0.212851	0.211476	0.202221	0.206137	0.212428
1084.8	0.233393	0.039549	0.231403	0.0553549	0.0759425	0.0525228	0.0525093	0.202375	0.207336	0.207457	0.207915	0.206246	0.198588	0.202128	0.207874
1082.74	0.218124	0.0393015	0.216373	0.0550503	0.0745932	0.0520335	0.0522066	0.191556	0.196134	0.195594	0.196245	0.19466	0.18798	0.191265	0.196507
1080.68	0.198418	0.03907	0.197424	0.0543066	0.0717778	0.051347	0.0515187	0.176799	0.180558	0.179843	0.180827	0.179703	0.173472	0.176212	0.180869
1078.62	0.178168	0.0390792	0.177603	0.0532924	0.0683978	0.0506995	0.0505662	0.160375	0.163272	0.163008	0.164078	0.163216	0.157648	0.159685	0.163914
1076.56	0.159819	0.0395673	0.159252	0.0522783	0.0649638	0.0500262	0.0496911	0.144358	0.146746	0.146907	0.14764	0.147103	0.142203	0.14389	0.147659
1074.51	0.144106	0.0403473	0.143457	0.0513557	0.061907	0.0494151	0.0491218	0.130118	0.132475	0.132687	0.132926	0.132975	0.128355	0.129983	0.133159
1072.45	0.13111	0.0411032	0.130797	0.0505289	0.0597228	0.0489676	0.0486136	0.118486	0.120876	0.120956	0.12109	0.121383	0.116827	0.118548	0.12126
1070.39	0.121492	0.0419199	0.1217	0.049962	0.0583017	0.0486499	0.0481024	0.109915	0.112266	0.112159	0.112554	0.112547	0.10824	0.110095	0.112509
1068.33	0.115942	0.0430991	0.116341	0.0498	0.0572812	0.048428	0.0479479	0.104792	0.106974	0.10686	0.107366	0.106908	0.103131	0.105041	0.107215
1066.27	0.114892	0.0447419	0.115262	0.0499575	0.0567403	0.048441	0.048292	0.103511	0.105359	0.105572	0.105845	0.105291	0.102001	0.103681	0.10573
1064.21	0.119186	0.047017	0.11956	0.050251	0.0570084	0.0487317	0.0487481	0.106658	0.108479	0.108994	0.108885	0.108671	0.105517	0.106761	0.109023
1062.15	0.130435	0.049965	0.130876	0.0506648	0.0583016	0.04917	0.0490118	0.116037	0.11797	0.118646	0.118355	0.118346	0.114772	0.11598	0.119002
1060.1	0.15162	0.0533432	0.152001	0.0515245	0.0609394	0.0498798	0.049455	0.13416	0.136358	0.137045	0.137009	0.136789	0.132021	0.133758	0.137916
1058.04	0.186274	0.057153	0.186518	0.0532006	0.0654783	0.0510303	0.0506989	0.163481	0.166729	0.167243	0.167638	0.167195	0.160324	0.162929	0.168297
1055.98	0.236323	0.0620661	0.236359	0.0558993	0.07274	0.0528522	0.0528464	0.205817	0.210729	0.211188	0.211864	0.211358	0.201555	0.20538	0.212061
1053.92	0.300878	0.0688895	0.300647	0.0599397	0.0837996	0.0556054	0.0557078	0.26054	0.267174	0.267684	0.26857	0.267893	0.254688	0.260059	0.268411
1051.86	0.3756	0.0780466	0.375104	0.0656001	0.0990014	0.059322	0.0595241	0.323704	0.331793	0.332226	0.333312	0.332274	0.315646	0.322621	0.333181
1049.81	0.451089	0.0903804	0.449805	0.0723738	0.117055	0.0638681	0.0643584	0.388352	0.397418	0.397778	0.399303	0.397834	0.378118	0.386346	0.399127
1047.75	0.511236	0.107118	0.508956	0.0787295	0.134631	0.0684149	0.0689678	0.444654	0.454029	0.454426	0.456704	0.454843	0.433251	0.441924	0.456283
1045.69	0.537566	0.129234	0.534967	0.0825652	0.146285	0.0712342	0.0714684	0.480061	0.48914	0.489515	0.492026	0.490039	0.469017	0.477127	0.491756
1043.63	0.521752	0.15778	0.518822	0.0823021	0.147403	0.0710509	0.0710981	0.483099	0.491115	0.491542	0.493595	0.491579	0.473474	0.480679	0.493188
1041.57	0.471869	0.193077	0.469083	0.0784327	0.138377	0.0684764	0.0685433	0.450729	0.457042	0.457622	0.459229	0.457116	0.442633	0.449075	0.458247
1039.51	0.405028	0.234082	0.404634	0.0733108	0.123919	0.0653389	0.0651913	0.39281	0.397654	0.39829	0.39948	0.397667	0.386147	0.391525	0.398284
1037.45	0.337939	0.279982	0.341124	0.0689713	0.109139	0.0628645	0.0624078	0.326513	0.33	0.330546	0.331466	0.330488	0.321119	0.325021	0.330396
1035.4	0.280384	0.330597	0.286589	0.0662052	0.0971681	0.0612465	0.0608445	0.265178	0.267437	0.26781	0.268657	0.268439	0.261007	0.263514	0.268035
1033.34	0.234195	0.385586	0.242407	0.0649992	0.0890461	0.0605206	0.0605868	0.214468	0.216299	0.216512	0.217189	0.217181	0.211691	0.213355	0.217303
1031.28	0.196749	0.445354	0.206035	0.0650413	0.0846337	0.061049	0.0615104	0.175197	0.177052	0.176998	0.177478	0.177402	0.173591	0.174749	0.177966
1029.22	0.165028	0.510519	0.174644	0.0663576	0.0830127	0.0630771	0.0634021	0.145587	0.147031	0.146794	0.147165	0.147129	0.144638	0.145365	0.147421
1027.16	0.137993	0.578048	0.146946	0.0690808	0.0833146	0.0663082	0.0663179	0.123032	0.123592	0.123461	0.123683	0.123872	0.12233	0.122849	0.123744
1025.1	0.115719	0.638204	0.12306	0.0728178	0.0851654	0.0703126	0.0702941	0.105483	0.10531	0.10539	0.105289	0.105602	0.104802	0.105287	0.105506
1023.04	0.09798	0.677095	0.103719	0.0771193	0.0877827	0.0749931	0.0749266	0.0914918	0.0911362	0.0914586	0.0910987	0.091306	0.0910194	0.0914641	0.0914401
1020.99	0.0840653	0.685173	0.0888288	0.0817953	0.0902487	0.0801318	0.0797537	0.0804015	0.0801083	0.0804445	0.0801607	0.0805977	0.0803908	0.0806057	0.0804727
1018.93	0.0730434	0.663658	0.0772363	0.0859185	0.0921429	0.0846374	0.0841083	0.0718646	0.0714174	0.0713834	0.0713766	0.0722852	0.0721291	0.0719913	0.071629
1016.87	0.0640479	0.62282	0.06799	0.0880156	0.0930225	0.0870244	0.0866265	0.0652089	0.0644767	0.0641843	0.064298	0.0651214	0.0655918	0.0652047	0.0643961
1014.81	0.0565846	0.572585	0.060588	0.0875024	0.0921208	0.0865517	0.0862321	0.0599112	0.0589441	0.0587917	0.0586467	0.0591017	0.0605608	0.0598555	0.058701
1012.75	0.0505864	0.517302	0.0544567	0.0847396	0.0889238	0.0833792	0.0832965	0.0556065	0.0545058	0.0545202	0.0540744	0.0544227	0.0565258	0.0555008	0.0542565
1010.69	0.0458443	0.45905	0.0490366	0.0803128	0.0839773	0.0785736	0.0787926	0.0519828	0.0509187	0.0508516	0.0504827	0.0507477	0.0528591	0.0519459	0.0505161
1008.64	0.0418781	0.399344	0.0443344	0.0750511	0.0784629	0.0735095	0.0736203	0.048951	0.0478548	0.0476506	0.0476994	0.0478111	0.0496885	0.0490218	0.0472728
1006.58	0.0384738	0.340117	0.0405038	0.0701106	0.0731964	0.0690647	0.0688998	0.0463731	0.0450914	0.0448639	0.0452929	0.0453124	0.0472447	0.0464099	0.0445821
1004.52	0.0356724	0.284695	0.0373549	0.0662369	0.0686772	0.0656907	0.065219	0.0440258	0.0427123	0.0426749	0.0428734	0.0430029	0.0451633	0.043926	0.0422769
1002.46	0.0332851	0.236026	0.0346806	0.0635146	0.0651675	0.0631656	0.0626852	0.0418554	0.040727	0.0409598	0.0405772	0.0410263	0.0433323	0.041834	0.0402195
1000.4	0.031134	0.195566	0.032405	0.0617819	0.0624896	0.0611337	0.0611851	0.0399983	0.0389986	0.039178	0.038819	0.0394245	0.0416745	0.0403375	0.0385888
998.343	0.0294981	0.163333	0.0307437	0.0606872	0.0605588	0.0597316	0.0600222	0.0385801	0.0375051	0.0374901	0.0374755	0.0379647	0.0398964	0.0391435	0.0373323
996.285	0.0282136	0.138454	0.0295285	0.0597006	0.0593284	0.0588933	0.0588977	0.0373892	0.0362377	0.0362904	0.0361638	0.0365589	0.0381873	0.0379044	0.0360777
994.227	0.0267223	0.11949	0.0280826	0.0586753	0.058494	0.0583411	0.0580899	0.0362838	0.0350863	0.0351107	0.0349725	0.0352965	0.0369964	0.0365677	0.0348311
992.168	0.0253676	0.104593	0.0264402	0.0579678	0.0578818	0.0580626	0.0577196	0.0354292	0.0339642	0.0336839	0.0340508	0.03412	0.0362899	0.0352663	0.0338013
990.11	0.0243584	0.0923694	0.024988	0.057758	0.0573088	0.057863	0.0576731	0.0346506	0.0327741	0.0325732	0.033268	0.0329405	0.0355441	0.0340962	0.0329114
988.051	0.0233851	0.0824507	0.0236921	0.057834	0.0566887	0.0575117	0.0576297	0.0337461	0.0318067	0.0320422	0.0325162	0.0319993	0.0346147	0.0331815	0.032137
985.993	0.0225124	0.0746395	0.0226403	0.0578479	0.0563382	0.0572982	0.0574365	0.0328671	0.0313339	0.0316939	0.0317478	0.0313708	0.0339252	0.0325901	0.0314512
983.935	0.0216562	0.0684109	0.0219636	0.0576951	0.0563798	0.0574262	0.0573132	0.0321027	0.0308688	0.0311111	0.0310234	0.0307319	0.033602	0.0320662	0.0307353
981.876	0.0207408	0.0631515	0.0213229	0.0575373	0.0565703	0.0575961	0.0573757	0.031577	0.0301669	0.0303891	0.0303958	0.030189	0.0332882	0.0315958	0.0300048
979.818	0.020046	0.0585408	0.02042	0.057473	0.0567898	0.057634	0.0575367	0.0313347	0.0295917	0.0297525	0.0298805	0.0299597	0.0329205	0.0313693	0.0293243
977.759	0.0196028	0.0548842	0.0195073	0.05748	0.0568872	0.0578525	0.0578227	0.031144	0.0292671	0.0291617	0.0294221	0.0296995	0.0325308	0.0310117	0.0288653
975.701	0.019005	0.0519174	0.0187851	0.0576484	0.0568109	0.0583905	0.0581322	0.0308129	0.0290727	0.0287938	0.0289162	0.0292758	0.0320061	0.0303674	0.0286744
973.642	0.0181646	0.0489983	0.0181757	0.0582431	0.0569851	0.0589652	0.0583482	0.0303262	0.0287713	0.0286929	0.0284511	0.0289638	0.0314983	0.0299518	0.0285226
971.584	0.0176923	0.0462928	0.0178407	0.0591729	0.0575492	0.0594958	0.0588414	0.0298512	0.0283674	0.028527	0.0281849	0.0286035	0.031283	0.0299553	0.0282784
969.525	0.0176706	0.0440063	0.0177534	0.0598384	0.057903	0.0599865	0.0597225	0.0295481	0.0281759	0.0282951	0.0280601	0.0279685	0.0312997	0.0300942	0.0279723
967.467	0.017442	0.0419986	0.0176906	0.0601121	0.0578545	0.0601898	0.0604318	0.0295257	0.0281738	0.0282143	0.0278586	0.0275293	0.0311448	0.030048	0.0276922
965.408	0.0170997	0.040209	0.0175905	0.0604772	0.0579781	0.0602122	0.0607806	0.029687	0.02819	0.0282127	0.0277094	0.0276591	0.0308628	0.0297243	0.0275055
963.35	0.0168998	0.0385718	0.0172025	0.0611708	0.0585633	0.060599	0.0609626	0.0297355	0.0280918	0.0282039	0.0277118	0.0278547	0.0308647	0.0295359	0.0273847
961.292	0.0165438	0.0368029	0.0165858	0.0620029	0.0593993	0.0614146	0.0610909	0.0297523	0.0278363	0.0281069	0.0276423	0.0277213	0.0311593	0.0297713	0.0273656
959.233	0.0162682	0.0350929	0.0162575	0.0625813	0.0601603	0.0620786	0.0614791	0.0299213	0.0275826	0.0278326	0.0275266	0.0275522	0.0315071	0.0300897	0.0273487
957.175	0.0164586	0.0341004	0.0163029	0.0628255	0.0607147	0.0624855	0.0622989	0.0298803	0.0274897	0.027627	0.0274462	0.0274634	0.031726	0.0301222	0.0271694
955.116	0.0166574	0.0335578	0.01641	0.0630575	0.0612187	0.0632075	0.0631903	0.0293679	0.0275651	0.0276046	0.0272975	0.0274426	0.0317154	0.0300174	0.0269851
953.058	0.0163947	0.0328311	0.0164091	0.0635231	0.061772	0.0640793	0.0637952	0.0289631	0.0276723	0.0276989	0.0271865	0.0276277	0.0315438	0.0300619	0.0269772
951	0.0160196	0.0319736	0.0161599	0.064114	0.0623161	0.064526	0.0642115	0.029144	0.0276142	0.0278868	0.0273112	0.0278812	0.0313855	0.0301705	0.027087

## Sheet: SCA_HID
-3.35024	0.10579
-3.02372	0.07544
-2.67594	0.04219
-2.40016	0.0203
-2.07308	-0.00347
-1.7084	-0.02711
-1.41702	-0.04609
-1.0715	-0.04607
-0.84447	-0.05702
-0.1696	-0.05965
0.11789	-0.06149
0.24071	-0.05358
0.67468	-0.0408
0.91714	-0.04234
1.1195	-0.03828
1.46718	-0.02077
1.7482	-0.00427
1.97364	0.01409
2.23485	0.04148
2.45571	0.0509
2.724	0.06502
3.06064	0.08573

## Sheet: SCA1_HID
-3.35024	0.10579
-3.02372	0.07544
-2.67594	0.04219
-2.40016	0.0203
-2.07308	-0.00347
-1.7084	-0.02711
-1.41702	-0.04609
-1.0715	-0.04607
-0.84447	-0.05702
-0.1696	-0.05965
0.11789	-0.06149
0.24071	-0.05358
0.67468	-0.0408
0.91714	-0.04234
1.1195	-0.03828
1.46718	-0.02077
1.7482	-0.00427
1.97364	0.01409
2.23485	0.04148
2.45571	0.0509
2.724	0.06502
3.06064	0.08573

## Sheet: PCA1_HID
-0.986586	-0.0424725
0.909098	-0.412337
0.913501	-0.402878
0.918219	-0.392032
0.924548	-0.376979
0.933607	-0.353931
0.942817	-0.32834
0.951339	-0.302158
0.961909	-0.265593
0.973634	-0.217329
0.984457	-0.159638
0.993121	-0.0887128
0.996987	-0.00678042
0.993609	0.0798895
0.982132	0.164464
0.963818	0.241182
0.939776	0.309507
0.90954	0.371614
0.866655	0.439756
0.788675	0.534529
0.605337	0.678308
0.0957514	0.817258
-0.615828	0.607424
-0.884758	0.330129
-0.953662	0.193692
-0.975655	0.127854
-0.984628	0.0925866
-0.988961	0.0718305
-0.991369	0.0581528
-0.992818	0.0475218
-0.993682	0.037764
-0.994107	0.0283267
-0.994114	0.0195363
-0.993822	0.0118892
-0.993459	0.00548756
-0.993148	0.000355227
-0.992928	-0.00306892
-0.992911	-0.00459305
-0.993199	-0.00434431
-0.993683	-0.00277092
-0.994178	0.000427111
-0.994738	0.00600298
-0.9954	0.0136931
-0.995858	0.0248399
-0.995861	0.0388762
-0.995562	0.0506411
-0.995293	0.0568172
-0.995199	0.058175
-0.995233	0.0561162
-0.99524	0.0511131
-0.99492	0.0441189
-0.99385	0.0376936
-0.99185	0.0368084
-0.98941	0.0494549
-0.986702	0.0854424
-0.979995	0.153986
-0.95734	0.259898
-0.900558	0.39629
-0.798757	0.543029
-0.655371	0.681236
-0.479066	0.799854
-0.283883	0.887372
-0.0920775	0.935708
0.077518	0.94968
0.220095	0.941786
0.338648	0.92101
0.432917	0.892276
0.500573	0.861523
0.544152	0.83471
0.570752	0.814323
0.588919	0.798896
0.607127	0.783971
0.632398	0.763841
0.668311	0.733474
0.714571	0.689523
0.767345	0.631489
0.820592	0.562328
0.869405	0.485542
0.91104	0.403752
0.943929	0.320744
0.967363	0.242216
0.98254	0.171519
0.991566	0.109727
0.996187	0.0564634
0.997676	0.0100604
0.99727	-0.0285302
0.995825	-0.0616734
0.993431	-0.0933057
0.990417	-0.12262
0.987196	-0.147741
0.984137	-0.166763
0.981177	-0.181981
0.97772	-0.198898
0.973629	-0.217688
0.970029	-0.232864
0.967876	-0.24173
0.966175	-0.24875
0.964042	-0.256928
0.961878	-0.264475

## Sheet: PCA1_HID1
-12.8265	-0.382044
-8.88003	2.57341
-12.9127	-0.382501
-12.7188	-0.443433
-12.5675	-0.317669
-12.7126	-0.253356
-12.8745	-0.943732
-12.3697	0.108183
-11.2888	0.340359
-11.8323	1.11449
-14.4789	-0.473295
6.3753	19.0603
-14.3621	-0.114091
-13.5514	0.208134
-12.9976	1.86313
-11.4042	3.63928
-9.75048	5.44915
5.84111	-3.95583
5.38173	-3.82406
5.15447	-3.78436
4.88553	-3.60179
4.85395	-3.49682
4.40321	-3.37569
4.20009	-3.25634
3.89816	-3.07154
3.51826	-2.99525
3.33214	-2.9567
3.04396	-2.94357
2.48278	-2.75757
2.11977	-2.47513
2.00678	-2.37539
5.9803	-4.10127
5.63275	-3.96824
6.89569	-1.93124
7.03943	-1.1366
7.27404	-0.494684
7.4671	0.13777
7.7257	1.00228
7.99822	1.59303
8.19171	2.34013
8.20767	2.70181
8.62624	3.70933
8.78556	4.60667
9.05215	5.72014
9.19255	6.35061
9.45948	7.60884
5.81907	-4.16117
6.1948	-3.42209
6.48843	-2.7316

## Sheet: PCA1_HID2
-0.694089	-0.0298805
0.639574	-0.29009
0.642672	-0.283435
0.645992	-0.275805
0.650444	-0.265214
0.656817	-0.249
0.663296	-0.230996
0.669292	-0.212576
0.676728	-0.186851
0.684977	-0.152897
0.692591	-0.11231
0.698687	-0.0624118
0.701407	-0.00477021
0.69903	0.0562044
0.690956	0.115705
0.678071	0.169678
0.661158	0.217746
0.639885	0.26144
0.609715	0.30938
0.554854	0.376056
0.425871	0.477208
0.0673636	0.574963
-0.433252	0.427339
-0.622451	0.232255
-0.670927	0.136268
-0.686399	0.0899488
-0.692712	0.0651371
-0.69576	0.0505347
-0.697455	0.040912
-0.698474	0.0334328
-0.699082	0.026568
-0.699381	0.0199286
-0.699386	0.0137443
-0.69918	0.00836438
-0.698925	0.00386064
-0.698706	0.000249911
-0.698551	-0.00215907
-0.698539	-0.00323133
-0.698742	-0.00305633
-0.699082	-0.00194942
-0.69943	0.000300484
-0.699824	0.00422325
-0.70029	0.00963347
-0.700612	0.0174755
-0.700614	0.0273505
-0.700404	0.0356273
-0.700215	0.0399724
-0.700149	0.0409277
-0.700172	0.0394792
-0.700178	0.0359594
-0.699953	0.0310388
-0.6992	0.0265185
-0.697793	0.0258957
-0.696076	0.0347928
-0.694171	0.060111
-0.689452	0.108333
-0.673514	0.182845
-0.633566	0.278801
-0.561946	0.382036
-0.461071	0.479268
-0.337036	0.562719
-0.199719	0.624289
-0.0647789	0.658295
0.0545359	0.668125
0.154842	0.662572
0.238248	0.647955
0.304569	0.62774
0.352166	0.606104
0.382826	0.587241
0.401539	0.572898
0.41432	0.562044
0.42713	0.551545
0.444909	0.537382
0.470175	0.516018
0.50272	0.485098
0.539847	0.444269
0.577308	0.395612
0.61165	0.341592
0.640941	0.284051
0.664079	0.225652
0.680566	0.170405
0.691243	0.120668
0.697593	0.0771957
0.700844	0.0397235
0.701892	0.00707776
0.701606	-0.0200717
0.700589	-0.0433889
0.698905	-0.065643
0.696784	-0.0862666
0.694519	-0.103939
0.692366	-0.117322
0.690284	-0.128028
0.687852	-0.13993
0.684974	-0.153149
0.682441	-0.163826
0.680926	-0.170063
0.67973	-0.175002
0.678229	-0.180756
0.676706	-0.186065
-1.44122	-0.0922597
-0.997782	0.621452
-1.4509	-0.09237
-1.42911	-0.107084
-1.41212	-0.0767137
-1.42842	-0.0611828
-1.44661	-0.227902
-1.38989	0.026125
-1.26844	0.0821933
-1.3295	0.269138
-1.62689	-0.114296
0.716344	4.60287
-1.61376	-0.0275517
-1.52266	0.0502622
-1.46045	0.449928
-1.2814	0.878849
-1.09559	1.31591
0.656321	-0.955293
0.604704	-0.923471
0.579169	-0.913884
0.54895	-0.869795
0.545401	-0.844447
0.494756	-0.815194
0.471932	-0.786372
0.438007	-0.741744
0.39532	-0.723322
0.374407	-0.714013
0.342027	-0.710842
0.278971	-0.665925
0.238183	-0.597719
0.225487	-0.573631
0.671962	-0.990414
0.63291	-0.958288
0.774816	-0.466375
0.790968	-0.274477
0.817329	-0.119461
0.839022	0.03327
0.868079	0.24204
0.898699	0.384699
0.920441	0.565118
0.922234	0.652458
0.969265	0.895765
0.987168	1.11246
1.01712	1.38136
1.0329	1.53361
1.06289	1.83746
0.653845	-1.00488
0.696063	-0.826398
0.729057	-0.659653

## Sheet: PCA1
	XLSTAT 2019.2.2.59614 - Principal Component Analysis (PCA) - Start time: 8/7/2024 at 10:51:59 AM / End time: 8/7/2024 at 10:52:32 AM / Microsoft Excel 16.04266
	Observations/variables table: Workbook = New Microsoft Excel Worksheet1.xlsx / Sheet = Sheet1 / Range = Sheet1!$C$2:$CW$50 / 49 rows and 99 columns
	Observation labels: Workbook = New Microsoft Excel Worksheet1.xlsx / Sheet = Sheet1 / Range = Sheet1!$A$2:$A$50 / 49 rows and 1 column
	PCA type: Correlation
	Standardisation: (n-1)
	Type of biplot: Correlation biplot / Coefficient = n/p
	:
	Summary statistics (Quantitative data):
	Variable	Observations	Obs. with missing data	Obs. without missing data	Minimum	Maximum	Mean	Std. deviation
	Var1	49	0	49	2	100	41.7846	37.3042
	Var2	49	0	49	0.0240277	0.0434906	0.036154	0.00791646
	Var3	49	0	49	0.0244004	0.0436131	0.0363671	0.00778115
	Var4	49	0	49	0.0246078	0.043773	0.0366349	0.00761752
	Var5	49	0	49	0.0251037	0.0437332	0.0369365	0.00744421
	Var6	49	0	49	0.0257647	0.0438834	0.037281	0.00726759
	Var7	49	0	49	0.0261229	0.044284	0.0377055	0.00708314
	Var8	49	0	49	0.0267356	0.0444013	0.0382097	0.00688452
	Var9	49	0	49	0.0275473	0.0448247	0.0387737	0.00668153
	Var10	49	0	49	0.028468	0.0452022	0.039423	0.00649746
	Var11	49	0	49	0.0295531	0.0455998	0.0401623	0.00632619
	Var12	49	0	49	0.0304422	0.0468362	0.0409457	0.00617165
	Var13	49	0	49	0.0314495	0.0485248	0.0417537	0.00608974
	Var14	49	0	49	0.0324051	0.0506093	0.0426026	0.00610145
	Var15	49	0	49	0.0333765	0.0528059	0.0434748	0.00617334
	Var16	49	0	49	0.0344637	0.0548525	0.0443399	0.00624269
	Var17	49	0	49	0.0358408	0.0565754	0.0452141	0.00621152
	Var18	49	0	49	0.037465	0.0579535	0.046104	0.00600772
	Var19	49	0	49	0.0394553	0.0590311	0.0470035	0.00557868
	Var20	49	0	49	0.0418807	0.0596468	0.0479713	0.00487021
	Var21	49	0	49	0.0453189	0.0595979	0.0491298	0.00392343
	Var22	49	0	49	0.0468962	0.0591026	0.0506151	0.00321671
	Var23	49	0	49	0.0468231	0.0585948	0.0525978	0.00416281
	Var24	49	0	49	0.0468939	0.067941	0.0553608	0.00732704
	Var25	49	0	49	0.0471428	0.0804557	0.0592535	0.0123213
	Var26	49	0	49	0.0473946	0.0971802	0.0646033	0.0191968
	Var27	49	0	49	0.046526	0.1186	0.0716284	0.0280392
	Var28	49	0	49	0.0451044	0.144522	0.0802716	0.0385952
	Var29	49	0	49	0.0437916	0.173179	0.09004	0.0500521
	Var30	49	0	49	0.0426144	0.20086	0.099909	0.0610291
	Var31	49	0	49	0.0415616	0.223302	0.10842	0.0698669
	Var32	49	0	49	0.0407154	0.237283	0.114063	0.0750895
	Var33	49	0	49	0.0400146	0.240505	0.115844	0.075966
	Var34	49	0	49	0.039549	0.233393	0.113742	0.0728458
	Var35	49	0	49	0.0393015	0.218124	0.108631	0.0668946
	Var36	49	0	49	0.03907	0.198418	0.101791	0.0595055
	Var37	49	0	49	0.0390792	0.178168	0.0944417	0.0518445
	Var38	49	0	49	0.0395673	0.159819	0.0875042	0.0446767
	Var39	49	0	49	0.0403473	0.144106	0.0814934	0.0384302
	Var40	49	0	49	0.0411032	0.13111	0.0766316	0.0333821
	Var41	49	0	49	0.0419199	0.1217	0.0731041	0.0297237
	Var42	49	0	49	0.0430991	0.116341	0.0710674	0.027562
	Var43	49	0	49	0.0447419	0.115262	0.0706479	0.0270861
	Var44	49	0	49	0.047017	0.11956	0.0721753	0.0287156
	Var45	49	0	49	0.0485743	0.130876	0.076302	0.0331693
	Var46	49	0	49	0.049455	0.152001	0.0840772	0.0416092
	Var47	49	0	49	0.050638	0.186518	0.0968133	0.0554135
	Var48	49	0	49	0.0526987	0.236359	0.115502	0.0752732
	Var49	49	0	49	0.0556054	0.300878	0.140083	0.100435
	Var50	49	0	49	0.059322	0.3756	0.168951	0.128573
	Var51	49	0	49	0.0638681	0.451089	0.198612	0.155786
	Var52	49	0	49	0.0684149	0.511236	0.223386	0.176715
	Var53	49	0	49	0.0712342	0.537566	0.23673	0.185847
	Var54	49	0	49	0.0710509	0.521752	0.23502	0.180571
	Var55	49	0	49	0.0684764	0.477809	0.220583	0.16349
	Var56	49	0	49	0.0651913	0.411279	0.200277	0.141164
	Var57	49	0	49	0.0624078	0.36069	0.180916	0.120378
	Var58	49	0	49	0.0608445	0.371865	0.166169	0.105187
	Var59	49	0	49	0.0605206	0.387841	0.156452	0.0961181
	Var60	49	0	49	0.061049	0.445354	0.150473	0.0914786
	Var61	49	0	49	0.0630771	0.510519	0.146738	0.0897148
	Var62	49	0	49	0.0663082	0.578048	0.144233	0.0902833
	Var63	49	0	49	0.0702941	0.638204	0.14249	0.0926109
	Var64	49	0	49	0.0749266	0.677095	0.141377	0.095318
	Var65	49	0	49	0.0788448	0.685173	0.140681	0.0969107
	Var66	49	0	49	0.069216	0.663658	0.139839	0.0969707
	Var67	49	0	49	0.061867	0.62282	0.137982	0.0960203
	Var68	49	0	49	0.0562479	0.572585	0.134102	0.0940443
	Var69	49	0	49	0.0505864	0.517302	0.127492	0.0900821
	Var70	49	0	49	0.0458443	0.45905	0.118217	0.0833099
	Var71	49	0	49	0.0418781	0.399344	0.107174	0.0738197
	Var72	49	0	49	0.0384738	0.340117	0.0957658	0.0627259
	Var73	49	0	49	0.0356724	0.284695	0.0853421	0.0516956
	Var74	49	0	49	0.0332851	0.236026	0.0766687	0.0420812
	Var75	49	0	49	0.031134	0.195566	0.0698715	0.0344696
	Var76	49	0	49	0.0294981	0.163333	0.0646886	0.0288171
	Var77	49	0	49	0.0282136	0.138454	0.0607287	0.0247846
	Var78	49	0	49	0.0267223	0.11949	0.0576692	0.0219952
	Var79	49	0	49	0.0253676	0.104593	0.055303	0.0200915
	Var80	49	0	49	0.0243584	0.0923694	0.0534266	0.0187949
	Var81	49	0	49	0.0233851	0.0824507	0.0518972	0.0179328
	Var82	49	0	49	0.0225124	0.0763971	0.0506912	0.0173915
	Var83	49	0	49	0.0216562	0.0730928	0.0497539	0.0170886
	Var84	49	0	49	0.0207408	0.0703899	0.0489796	0.0169536
	Var85	49	0	49	0.020046	0.0684196	0.0483243	0.0169463
	Var86	49	0	49	0.0195073	0.0670731	0.047814	0.017043
	Var87	49	0	49	0.0187851	0.0659314	0.0474737	0.0172203
	Var88	49	0	49	0.0181646	0.0647425	0.0472732	0.0174305
	Var89	49	0	49	0.0176923	0.0635102	0.0471298	0.0176122
	Var90	49	0	49	0.0176706	0.0629049	0.0470154	0.017793
	Var91	49	0	49	0.017442	0.0624421	0.0469709	0.0180194
	Var92	49	0	49	0.0170997	0.0627964	0.0470096	0.0182605
	Var93	49	0	49	0.0168998	0.0629441	0.0470844	0.0185176
	Var94	49	0	49	0.0165438	0.0629052	0.0471577	0.018843
	Var95	49	0	49	0.0162575	0.0632364	0.0472815	0.0191832
	Var96	49	0	49	0.0163029	0.0638436	0.0475202	0.0194297
	Var97	49	0	49	0.01641	0.0642073	0.0478202	0.0196421
	Var98	49	0	49	0.0163947	0.0645758	0.048073	0.0199553
	Var99	49	0	49	0.0160196	0.0651963	0.0482898	0.0203349
	Correlation matrix (Pearson (n-1)):
	Variables	Var1	Var2	Var3	Var4	Var5	Var6	Var7	Var8	Var9	Var10	Var11	Var12	Var13	Var14	Var15	Var16	Var17	Var18	Var19	Var20	Var21	Var22	Var23	Var24	Var25	Var26	Var27	Var28	Var29	Var30	Var31	Var32	Var33	Var34	Var35	Var36	Var37	Var38	Var39	Var40	Var41	Var42	Var43	Var44	Var45	Var46	Var47	Var48
	Var1	1	-0.877526	-0.881984	-0.887075	-0.894513	-0.904778	-0.914475	-0.923386	-0.934997	-0.948402	-0.961935	-0.974025	-0.980853	-0.979734	-0.970406	-0.954702	-0.933336	-0.905042	-0.86376	-0.788205	-0.609001	-0.106187	0.602294	0.873001	0.942997	0.965423	0.97458	0.979068	0.981806	0.983724	0.985057	0.986003	0.986674	0.987098	0.987398	0.98764	0.987768	0.987796	0.987835	0.987883	0.987792	0.987619	0.98747	0.987001	0.986055	0.985131	0.984699	0.984664
	Var2	-0.877526	1	0.999815	0.999369	0.998679	0.997303	0.99519	0.992332	0.987117	0.97809	0.964339	0.943103	0.912863	0.874158	0.829137	0.781329	0.731926	0.679661	0.613657	0.505126	0.281594	-0.235683	-0.797897	-0.932325	-0.941219	-0.935373	-0.929691	-0.9254	-0.922007	-0.918813	-0.915345	-0.911561	-0.907639	-0.903944	-0.900768	-0.89823	-0.896555	-0.89596	-0.896481	-0.897746	-0.899682	-0.90276	-0.906982	-0.912452	-0.918475	-0.923079	-0.925309	-0.925654
	Var3	-0.881984	0.999815	1	0.999793	0.999129	0.99781	0.99595	0.993478	0.988746	0.980245	0.966991	0.94633	0.916899	0.879109	0.834882	0.787723	0.738796	0.686847	0.621235	0.513267	0.290148	-0.228412	-0.795674	-0.933571	-0.94385	-0.938608	-0.933249	-0.929158	-0.925909	-0.922837	-0.919488	-0.915826	-0.912016	-0.908409	-0.905292	-0.902787	-0.901126	-0.900531	-0.901044	-0.902288	-0.904187	-0.907191	-0.911309	-0.91665	-0.92254	-0.927045	-0.929229	-0.929574
	Var4	-0.887075	0.999369	0.999793	1	0.99965	0.998447	0.996729	0.994592	0.990414	0.982547	0.969903	0.949963	0.921418	0.884539	0.841146	0.794732	0.746447	0.695041	0.63002	0.522776	0.300321	-0.219201	-0.792089	-0.934275	-0.946359	-0.941904	-0.936939	-0.933081	-0.92999	-0.927048	-0.923825	-0.92029	-0.916592	-0.913074	-0.910027	-0.907576	-0.905956	-0.905383	-0.905882	-0.9071	-0.90897	-0.911908	-0.915905	-0.921098	-0.926839	-0.931229	-0.933357	-0.933698
	Var5	-0.894513	0.998679	0.999129	0.99965	1	0.999448	0.998037	0.996127	0.992461	0.985404	0.97376	0.95502	0.927683	0.891831	0.84939	0.803901	0.756495	0.7059	0.64162	0.535171	0.31351	-0.20738	-0.787877	-0.935723	-0.950154	-0.946734	-0.942272	-0.938696	-0.935795	-0.932997	-0.929907	-0.926508	-0.922943	-0.919543	-0.9166	-0.914241	-0.912695	-0.912163	-0.912655	-0.913849	-0.915688	-0.918537	-0.922377	-0.92736	-0.93286	-0.937055	-0.939077	-0.939389
	Var6	-0.904778	0.997303	0.99781	0.998447	0.999448	1	0.999451	0.998017	0.994988	0.988999	0.978878	0.962044	0.936648	0.902585	0.861809	0.817782	0.77163	0.722138	0.658954	0.553816	0.333583	-0.189017	-0.780707	-0.936991	-0.954958	-0.953151	-0.94951	-0.946407	-0.943818	-0.941245	-0.93835	-0.935145	-0.931772	-0.928549	-0.925756	-0.923522	-0.922064	-0.92158	-0.922078	-0.92324	-0.925001	-0.927718	-0.931376	-0.936084	-0.941232	-0.945133	-0.946999	-0.947271
	Var7	-0.914475	0.99519	0.99595	0.996729	0.998037	0.999451	1	0.999451	0.997298	0.992447	0.983879	0.969034	0.945839	0.91403	0.875354	0.833062	0.788238	0.739791	0.677788	0.574287	0.355921	-0.168106	-0.771684	-0.937187	-0.959071	-0.959063	-0.95636	-0.953804	-0.951567	-0.949246	-0.946573	-0.943581	-0.940409	-0.937361	-0.934715	-0.932598	-0.931217	-0.930776	-0.931291	-0.932415	-0.934081	-0.936666	-0.940153	-0.944593	-0.949386	-0.952979	-0.954686	-0.954921
	Var8	-0.923386	0.992332	0.993478	0.994592	0.996127	0.998017	0.999451	1	0.999081	0.995535	0.988435	0.975439	0.954443	0.924979	0.888478	0.848028	0.804645	0.757281	0.696495	0.594757	0.378475	-0.146641	-0.761789	-0.936494	-0.962345	-0.964155	-0.962395	-0.960383	-0.958489	-0.956417	-0.95396	-0.95117	-0.948172	-0.945269	-0.942748	-0.940733	-0.93942	-0.939025	-0.939561	-0.94066	-0.942255	-0.944727	-0.94805	-0.952231	-0.95668	-0.959969	-0.961516	-0.961711
	Var9	-0.934997	0.987117	0.988746	0.990414	0.992461	0.994988	0.997298	0.999081	1	0.998573	0.993595	0.983058	0.964992	0.938678	0.905177	0.867367	0.826247	0.780784	0.721948	0.622814	0.409809	-0.115806	-0.746169	-0.933722	-0.965247	-0.969678	-0.969283	-0.968055	-0.966663	-0.964955	-0.962807	-0.960296	-0.957543	-0.954838	-0.952485	-0.950613	-0.949402	-0.949064	-0.949615	-0.950701	-0.952237	-0.954558	-0.957646	-0.961467	-0.96544	-0.968312	-0.969631	-0.969766
	Var10	-0.948402	0.97809	0.980245	0.982547	0.985404	0.988999	0.992447	0.995535	0.998573	1	0.998088	0.990897	0.976593	0.954312	0.924755	0.890469	0.852437	0.809691	0.753599	0.658009	0.449683	-0.0752961	-0.724069	-0.928091	-0.96699	-0.974848	-0.976251	-0.976056	-0.975323	-0.974107	-0.972382	-0.97026	-0.967854	-0.965446	-0.963344	-0.961684	-0.960619	-0.960346	-0.960899	-0.961969	-0.963425	-0.965522	-0.968272	-0.971594	-0.974921	-0.977247	-0.978267	-0.978314
	Var11	-0.961935	0.964339	0.966991	0.969903	0.97376	0.978878	0.983879	0.988435	0.993595	0.998088	1	0.9972	0.987498	0.969882	0.944887	0.914715	0.880274	0.840682	0.787868	0.696593	0.494137	-0.0287461	-0.697018	-0.919485	-0.966769	-0.978543	-0.981977	-0.982923	-0.982919	-0.982257	-0.981022	-0.979352	-0.977362	-0.975319	-0.973537	-0.972151	-0.971279	-0.971094	-0.971656	-0.972689	-0.97401	-0.975814	-0.978148	-0.980845	-0.983373	-0.985037	-0.98571	-0.985657
	Var12	-0.974025	0.943103	0.94633	0.949963	0.95502	0.962044	0.969034	0.975439	0.983058	0.990897	0.9972	1	0.996365	0.984666	0.965272	0.940214	0.91038	0.874922	0.826532	0.741248	0.547323	0.02991	-0.659315	-0.903826	-0.961462	-0.978122	-0.984098	-0.986494	-0.987427	-0.987489	-0.986907	-0.985858	-0.984445	-0.982909	-0.98156	-0.980536	-0.979914	-0.979851	-0.980422	-0.981366	-0.982468	-0.983895	-0.985719	-0.987652	-0.98919	-0.990018	-0.990264	-0.990111
	Var13	-0.980853	0.912863	0.916899	0.921418	0.927683	0.936648	0.945839	0.954443	0.964992	0.976593	0.987498	0.996365	1	0.995785	0.983382	0.964691	0.94077	0.910787	0.868336	0.791243	0.609628	0.103292	-0.60658	-0.876731	-0.946904	-0.96961	-0.978837	-0.983165	-0.985377	-0.986431	-0.986757	-0.986585	-0.985985	-0.985152	-0.984386	-0.983814	-0.983483	-0.983547	-0.984088	-0.984872	-0.985686	-0.986667	-0.987899	-0.988964	-0.989376	-0.989239	-0.988983	-0.988746
	Var14	-0.979734	0.874158	0.879109	0.884539	0.891831	0.902585	0.91403	0.924979	0.938678	0.954312	0.969882	0.984666	0.995785	1	0.995779	0.984385	0.967081	0.943314	0.907803	0.840459	0.67417	0.184693	-0.542145	-0.838718	-0.922354	-0.951683	-0.964569	-0.971125	-0.974821	-0.977027	-0.97841	-0.979258	-0.979591	-0.979554	-0.979435	-0.979353	-0.979324	-0.979503	-0.979981	-0.980573	-0.981074	-0.981581	-0.982196	-0.982362	-0.981608	-0.980471	-0.979686	-0.979379
	Var15	-0.970406	0.829137	0.834882	0.841146	0.84939	0.861809	0.875354	0.888478	0.905177	0.924755	0.944887	0.965272	0.983382	0.995779	1	0.996262	0.985669	0.968231	0.940069	0.883215	0.733887	0.265756	-0.472132	-0.793075	-0.889675	-0.925473	-0.941955	-0.950706	-0.955875	-0.95923	-0.961675	-0.963541	-0.964795	-0.965536	-0.966049	-0.96644	-0.966693	-0.966969	-0.967384	-0.967803	-0.967999	-0.968027	-0.968061	-0.967382	-0.96551	-0.963418	-0.962127	-0.961758
	Var16	-0.954702	0.781329	0.787723	0.794732	0.803901	0.817782	0.833062	0.848028	0.867367	0.890469	0.914715	0.940214	0.964691	0.984385	0.996262	1	0.996354	0.985485	0.964843	0.918831	0.787447	0.343938	-0.399171	-0.741713	-0.850462	-0.892459	-0.912396	-0.923252	-0.929857	-0.934349	-0.937828	-0.940682	-0.942833	-0.944335	-0.945469	-0.946315	-0.946818	-0.947165	-0.947519	-0.947787	-0.9477	-0.947289	-0.946809	-0.94539	-0.942536	-0.939598	-0.937866	-0.937459
	Var17	-0.933336	0.731926	0.738796	0.746447	0.756495	0.77163	0.788238	0.804645	0.826247	0.852437	0.880274	0.91038	0.94077	0.967081	0.985669	0.996354	1	0.996276	0.983314	0.948237	0.835542	0.419611	-0.32343	-0.68517	-0.805471	-0.853535	-0.876885	-0.889822	-0.897868	-0.903502	-0.907998	-0.911818	-0.914857	-0.917123	-0.918883	-0.920185	-0.92094	-0.921351	-0.921631	-0.92175	-0.921413	-0.920624	-0.919689	-0.917631	-0.913929	-0.910233	-0.9081	-0.90768
	Var18	-0.905042	0.679661	0.686847	0.695041	0.7059	0.722138	0.739791	0.757281	0.780784	0.809691	0.840682	0.874922	0.910787	0.943314	0.968231	0.985485	0.996276	1	0.995156	0.971309	0.878051	0.492964	-0.244579	-0.623281	-0.754525	-0.808443	-0.83513	-0.850107	-0.859558	-0.866312	-0.871807	-0.876571	-0.88048	-0.883498	-0.885872	-0.887622	-0.888633	-0.889114	-0.889312	-0.889268	-0.888686	-0.887569	-0.886271	-0.883674	-0.879214	-0.87482	-0.872304	-0.87187
	Var19	-0.86376	0.613657	0.621235	0.63002	0.64162	0.658954	0.677788	0.696495	0.721948	0.753599	0.787868	0.826532	0.868336	0.907803	0.940069	0.964843	0.983314	0.995156	1	0.989816	0.919914	0.573799	-0.15098	-0.546052	-0.68881	-0.749021	-0.779331	-0.796518	-0.807472	-0.815421	-0.821995	-0.827778	-0.832615	-0.836422	-0.839435	-0.841646	-0.842915	-0.843464	-0.843579	-0.843353	-0.842482	-0.841018	-0.839389	-0.836258	-0.830998	-0.825882	-0.822967	-0.822513
	Var20	-0.788205	0.505126	0.513267	0.522776	0.535171	0.553816	0.574287	0.594757	0.622814	0.658009	0.696593	0.741248	0.791243	0.840459	0.883215	0.918831	0.948237	0.971309	0.989816	1	0.966055	0.683064	-0.010955	-0.423251	-0.580376	-0.648758	-0.683832	-0.70395	-0.716898	-0.726421	-0.734413	-0.741546	-0.747612	-0.752458	-0.756303	-0.759112	-0.760704	-0.761336	-0.761366	-0.760931	-0.75969	-0.757738	-0.755616	-0.751737	-0.745393	-0.739303	-0.735867	-0.735398
	Var21	-0.609001	0.281594	0.290148	0.300321	0.31351	0.333583	0.355921	0.378475	0.409809	0.449683	0.494137	0.547323	0.609628	0.67417	0.733887	0.787447	0.835542	0.878051	0.919914	0.966055	1	0.848174	0.246355	-0.176457	-0.3518	-0.431555	-0.473527	-0.498013	-0.51399	-0.525911	-0.536081	-0.545308	-0.553297	-0.559789	-0.564962	-0.568715	-0.570825	-0.571609	-0.5715	-0.570722	-0.568911	-0.566194	-0.563265	-0.558218	-0.55023	-0.54268	-0.538474	-0.538011
	Var22	-0.106187	-0.235683	-0.228412	-0.219201	-0.20738	-0.189017	-0.168106	-0.146641	-0.115806	-0.0752961	-0.0287461	0.02991	0.103292	0.184693	0.265756	0.343938	0.419611	0.492964	0.573799	0.683064	0.848174	1	0.721824	0.370452	0.195872	0.110147	0.0632034	0.0351271	0.0164651	0.00227321	-0.0100744	-0.0214868	-0.031564	-0.0399102	-0.0466214	-0.0514877	-0.0542108	-0.0551261	-0.0547193	-0.0533966	-0.0508885	-0.0473393	-0.0435822	-0.0374301	-0.0279683	-0.0191721	-0.0143452	-0.0139997
	Var23	0.602294	-0.797897	-0.795674	-0.792089	-0.787877	-0.780707	-0.771684	-0.761789	-0.746169	-0.724069	-0.697018	-0.659315	-0.60658	-0.542145	-0.472132	-0.399171	-0.32343	-0.244579	-0.15098	-0.010955	0.246355	0.721824	1	0.909978	0.819296	0.766297	0.735113	0.715742	0.702525	0.692224	0.683053	0.674386	0.66655	0.659915	0.654504	0.650557	0.648366	0.647755	0.648349	0.64967	0.651779	0.654588	0.65748	0.661974	0.668724	0.674912	0.678233	0.678275
	Var24	0.873001	-0.932325	-0.933571	-0.934275	-0.935723	-0.936991	-0.937187	-0.936494	-0.933722	-0.928091	-0.919485	-0.903826	-0.876731	-0.838718	-0.793075	-0.741713	-0.68517	-0.623281	-0.546052	-0.423251	-0.176457	0.370452	0.909978	1	0.983185	0.963435	0.949646	0.940427	0.933862	0.928559	0.923685	0.918933	0.914491	0.910614	0.9074	0.905055	0.903784	0.903517	0.904022	0.904952	0.906277	0.907927	0.909563	0.911943	0.915383	0.918462	0.920051	0.919922
	Var25	0.942997	-0.941219	-0.94385	-0.946359	-0.950154	-0.954958	-0.959071	-0.962345	-0.965247	-0.96699	-0.966769	-0.961462	-0.946904	-0.922354	-0.889675	-0.850462	-0.805471	-0.754525	-0.68881	-0.580376	-0.3518	0.195872	0.819296	0.983185	1	0.996133	0.990788	0.986526	0.983233	0.980407	0.977668	0.974873	0.972141	0.969661	0.967574	0.966066	0.965273	0.96516	0.965582	0.966295	0.967239	0.968335	0.969376	0.970761	0.972631	0.974224	0.974999	0.974827
	Var26	0.965423	-0.935373	-0.938608	-0.941904	-0.946734	-0.953151	-0.959063	-0.964155	-0.969678	-0.974848	-0.978543	-0.978122	-0.96961	-0.951683	-0.925473	-0.892459	-0.853535	-0.808443	-0.749021	-0.648758	-0.431555	0.110147	0.766297	0.963435	0.996133	1	0.998837	0.997026	0.995346	0.993746	0.992062	0.990229	0.988341	0.986556	0.985032	0.983937	0.983371	0.983318	0.983695	0.984306	0.985063	0.985901	0.986671	0.987591	0.988722	0.989615	0.990011	0.989833
	Var27	0.97458	-0.929691	-0.933249	-0.936939	-0.942272	-0.94951	-0.95636	-0.962395	-0.969283	-0.976251	-0.981977	-0.984098	-0.978837	-0.964569	-0.941955	-0.912396	-0.876885	-0.83513	-0.779331	-0.683832	-0.473527	0.0632034	0.735113	0.949646	0.990788	0.998837	1	0.999575	0.998801	0.997895	0.996817	0.995538	0.994137	0.992759	0.99156	0.990694	0.990246	0.990218	0.990564	0.991107	0.991744	0.992435	0.993065	0.993739	0.994476	0.994997	0.995189	0.995014
	Var28	0.979068	-0.9254	-0.929158	-0.933081	-0.938696	-0.946407	-0.953804	-0.960383	-0.968055	-0.976056	-0.982923	-0.986494	-0.983165	-0.971125	-0.950706	-0.923252	-0.889822	-0.850107	-0.796518	-0.70395	-0.498013	0.0351271	0.715742	0.940427	0.986526	0.997026	0.999575	1	0.999797	0.999329	0.998638	0.997719	0.996639	0.995526	0.994535	0.993813	0.993437	0.993422	0.993739	0.994226	0.994779	0.99537	0.995908	0.996431	0.99693	0.997231	0.997304	0.997136
	Var29	0.981806	-0.922007	-0.925909	-0.92999	-0.935795	-0.943818	-0.951567	-0.958489	-0.966663	-0.975323	-0.982919	-0.987427	-0.985377	-0.974821	-0.955875	-0.929857	-0.897868	-0.859558	-0.807472	-0.716898	-0.51399	0.0164651	0.702525	0.933862	0.983233	0.995346	0.998801	0.999797	1	0.999857	0.999456	0.998811	0.997977	0.997069	0.99624	0.995628	0.995304	0.995294	0.995577	0.99601	0.996491	0.996999	0.997454	0.997856	0.998187	0.998339	0.998339	0.998189
	Var30	0.983724	-0.918813	-0.922837	-0.927048	-0.932997	-0.941245	-0.949246	-0.956417	-0.964955	-0.974107	-0.982257	-0.987489	-0.986431	-0.977027	-0.95923	-0.934349	-0.903502	-0.866312	-0.815421	-0.726421	-0.525911	0.00227321	0.692224	0.928559	0.980407	0.993746	0.997895	0.999329	0.999857	1	0.999867	0.999476	0.998873	0.998161	0.997485	0.996976	0.9967	0.996686	0.996926	0.997298	0.9977	0.998116	0.998481	0.998762	0.998944	0.998972	0.998916	0.998792
	Var31	0.985057	-0.915345	-0.919488	-0.923825	-0.929907	-0.93835	-0.946573	-0.95396	-0.962807	-0.972382	-0.981022	-0.986907	-0.986757	-0.97841	-0.961675	-0.937828	-0.907998	-0.871807	-0.821995	-0.734413	-0.536081	-0.0100744	0.683053	0.923685	0.977668	0.992062	0.996817	0.998638	0.999456	0.999867	1	0.999869	0.999506	0.998998	0.998479	0.998073	0.997845	0.997826	0.998017	0.998318	0.998632	0.998947	0.999206	0.999356	0.999382	0.999286	0.999174	0.999078
	Var32	0.986003	-0.911561	-0.915826	-0.92029	-0.926508	-0.935145	-0.943581	-0.95117	-0.960296	-0.97026	-0.979352	-0.985858	-0.986585	-0.979258	-0.963541	-0.940682	-0.911818	-0.876571	-0.827778	-0.741546	-0.545308	-0.0214868	0.674386	0.918933	0.974873	0.990229	0.995538	0.997719	0.998811	0.999476	0.999869	1	0.999882	0.999583	0.999225	0.998924	0.998744	0.998722	0.998862	0.999086	0.999308	0.999516	0.999657	0.999665	0.999533	0.999311	0.999141	0.999071
	Var33	0.986674	-0.907639	-0.912016	-0.916592	-0.922943	-0.931772	-0.940409	-0.948172	-0.957543	-0.967854	-0.977362	-0.984445	-0.985985	-0.979591	-0.964795	-0.942833	-0.914857	-0.88048	-0.832615	-0.747612	-0.553297	-0.031564	0.66655	0.914491	0.972141	0.988341	0.994137	0.996639	0.997977	0.998873	0.999506	0.999882	1	0.999908	0.999707	0.999506	0.999374	0.999351	0.999442	0.999588	0.999716	0.999814	0.999834	0.999698	0.999411	0.999069	0.998847	0.998799
	Var34	0.987098	-0.903944	-0.908409	-0.913074	-0.919543	-0.928549	-0.937361	-0.945269	-0.954838	-0.965446	-0.975319	-0.982909	-0.985152	-0.979554	-0.965536	-0.944335	-0.917123	-0.883498	-0.836422	-0.752458	-0.559789	-0.0399102	0.659915	0.910614	0.969661	0.986556	0.992759	0.995526	0.997069	0.998161	0.998998	0.999583	0.999908	1	0.999942	0.999832	0.999743	0.999719	0.999768	0.999842	0.99988	0.999876	0.999788	0.999522	0.999095	0.998648	0.99838	0.99835
	Var35	0.987398	-0.900768	-0.905292	-0.910027	-0.9166	-0.925756	-0.934715	-0.942748	-0.952485	-0.963344	-0.973537	-0.98156	-0.984386	-0.979435	-0.966049	-0.945469	-0.918883	-0.885872	-0.839435	-0.756303	-0.564962	-0.0466214	0.654504	0.9074	0.967574	0.985032	0.99156	0.994535	0.99624	0.997485	0.998479	0.999225	0.999707	0.999942	1	0.999969	0.999919	0.999896	0.99991	0.999924	0.99989	0.999804	0.99963	0.999258	0.998716	0.998182	0.997877	0.997862
	Var36	0.98764	-0.89823	-0.902787	-0.907576	-0.914241	-0.923522	-0.932598	-0.940733	-0.950613	-0.961684	-0.972151	-0.980536	-0.983814	-0.979353	-0.96644	-0.946315	-0.920185	-0.887622	-0.841646	-0.759112	-0.568715	-0.0514877	0.650557	0.905055	0.966066	0.983937	0.990694	0.993813	0.995628	0.996976	0.998073	0.998924	0.999506	0.999832	0.999969	1	0.999986	0.999966	0.999954	0.999927	0.999845	0.999703	0.999463	0.99901	0.99838	0.99778	0.997446	0.997439
	Var37	0.987768	-0.896555	-0.901126	-0.905956	-0.912695	-0.922064	-0.931217	-0.93942	-0.949402	-0.960619	-0.971279	-0.979914	-0.983483	-0.979324	-0.966693	-0.946818	-0.92094	-0.888633	-0.842915	-0.760704	-0.570825	-0.0542108	0.648366	0.903784	0.965273	0.983371	0.990246	0.993437	0.995304	0.9967	0.997845	0.998744	0.999374	0.999743	0.999919	0.999986	1	0.999991	0.999967	0.999917	0.999809	0.999636	0.999356	0.998853	0.998165	0.997518	0.99716	0.997154
	Var38	0.987796	-0.89596	-0.900531	-0.905383	-0.912163	-0.92158	-0.930776	-0.939025	-0.949064	-0.960346	-0.971094	-0.979851	-0.983547	-0.979503	-0.966969	-0.947165	-0.921351	-0.889114	-0.843464	-0.761336	-0.571609	-0.0551261	0.647755	0.903517	0.96516	0.983318	0.990218	0.993422	0.995294	0.996686	0.997826	0.998722	0.999351	0.999719	0.999896	0.999966	0.999991	1	0.999986	0.999931	0.999816	0.999638	0.999352	0.998838	0.998129	0.997459	0.997084	0.997067
	Var39	0.987835	-0.896481	-0.901044	-0.905882	-0.912655	-0.922078	-0.931291	-0.939561	-0.949615	-0.960899	-0.971656	-0.980422	-0.984088	-0.979981	-0.967384	-0.947519	-0.921631	-0.889312	-0.843579	-0.761366	-0.5715	-0.0547193	0.648349	0.904022	0.965582	0.983695	0.990564	0.993739	0.995577	0.996926	0.998017	0.998862	0.999442	0.999768	0.99991	0.999954	0.999967	0.999986	1	0.999972	0.999876	0.999717	0.999459	0.998973	0.998284	0.997621	0.997244	0.997212
	Var40	0.987883	-0.897746	-0.902288	-0.9071	-0.913849	-0.92324	-0.932415	-0.94066	-0.950701	-0.961969	-0.972689	-0.981366	-0.984872	-0.980573	-0.967803	-0.947787	-0.92175	-0.889268	-0.843353	-0.760931	-0.570722	-0.0533966	0.64967	0.904952	0.966295	0.984306	0.991107	0.994226	0.99601	0.997298	0.998318	0.999086	0.999588	0.999842	0.999924	0.999927	0.999917	0.999931	0.999972	1	0.999959	0.999842	0.999623	0.999185	0.998543	0.99791	0.99754	0.997493
	Var41	0.987792	-0.899682	-0.904187	-0.90897	-0.915688	-0.925001	-0.934081	-0.942255	-0.952237	-0.963425	-0.97401	-0.982468	-0.985686	-0.981074	-0.967999	-0.9477	-0.921413	-0.888686	-0.842482	-0.75969	-0.568911	-0.0508885	0.651779	0.906277	0.967239	0.985063	0.991744	0.994779	0.996491	0.9977	0.998632	0.999308	0.999716	0.99988	0.99989	0.999845	0.999809	0.999816	0.999876	0.999959	1	0.999953	0.999783	0.999406	0.998833	0.998246	0.99789	0.997828
	Var42	0.987619	-0.90276	-0.907191	-0.911908	-0.918537	-0.927718	-0.936666	-0.944727	-0.954558	-0.965522	-0.975814	-0.983895	-0.986667	-0.981581	-0.968027	-0.947289	-0.920624	-0.887569	-0.841018	-0.757738	-0.566194	-0.0473393	0.654588	0.907927	0.968335	0.985901	0.992435	0.99537	0.996999	0.998116	0.998947	0.999516	0.999814	0.999876	0.999804	0.999703	0.999636	0.999638	0.999717	0.999842	0.999953	1	0.999926	0.999651	0.999183	0.998672	0.998348	0.998279
	Var43	0.98747	-0.906982	-0.911309	-0.915905	-0.922377	-0.931376	-0.940153	-0.94805	-0.957646	-0.968272	-0.978148	-0.985719	-0.987899	-0.982196	-0.968061	-0.946809	-0.919689	-0.886271	-0.839389	-0.755616	-0.563265	-0.0435822	0.65748	0.909563	0.969376	0.986671	0.993065	0.995908	0.997454	0.998481	0.999206	0.999657	0.999834	0.999788	0.99963	0.999463	0.999356	0.999352	0.999459	0.999623	0.999783	0.999926	1	0.999892	0.99957	0.999159	0.998881	0.998809
	Var44	0.987001	-0.912452	-0.91665	-0.921098	-0.92736	-0.936084	-0.944593	-0.952231	-0.961467	-0.971594	-0.980845	-0.987652	-0.988964	-0.982362	-0.967382	-0.94539	-0.917631	-0.883674	-0.836258	-0.751737	-0.558218	-0.0374301	0.661974	0.911943	0.970761	0.987591	0.993739	0.996431	0.997856	0.998762	0.999356	0.999665	0.999698	0.999522	0.999258	0.99901	0.998853	0.998838	0.998973	0.999185	0.999406	0.999651	0.999892	1	0.999881	0.999607	0.99939	0.999319
	Var45	0.986055	-0.918475	-0.92254	-0.926839	-0.93286	-0.941232	-0.949386	-0.95668	-0.96544	-0.974921	-0.983373	-0.98919	-0.989376	-0.981608	-0.96551	-0.942536	-0.913929	-0.879214	-0.830998	-0.745393	-0.55023	-0.0279683	0.668724	0.915383	0.972631	0.988722	0.994476	0.99693	0.998187	0.998944	0.999382	0.999533	0.999411	0.999095	0.998716	0.99838	0.998165	0.998129	0.998284	0.998543	0.998833	0.999183	0.99957	0.999881	1	0.999913	0.999786	0.999727
	Var46	0.985131	-0.923079	-0.927045	-0.931229	-0.937055	-0.945133	-0.952979	-0.959969	-0.968312	-0.977247	-0.985037	-0.990018	-0.989239	-0.980471	-0.963418	-0.939598	-0.910233	-0.87482	-0.825882	-0.739303	-0.54268	-0.0191721	0.674912	0.918462	0.974224	0.989615	0.994997	0.997231	0.998339	0.998972	0.999286	0.999311	0.999069	0.998648	0.998182	0.99778	0.997518	0.997459	0.997621	0.99791	0.998246	0.998672	0.999159	0.999607	0.999913	1	0.999967	0.999929
	Var47	0.984699	-0.925309	-0.929229	-0.933357	-0.939077	-0.946999	-0.954686	-0.961516	-0.969631	-0.978267	-0.98571	-0.990264	-0.988983	-0.979686	-0.962127	-0.937866	-0.9081	-0.872304	-0.822967	-0.735867	-0.538474	-0.0143452	0.678233	0.920051	0.974999	0.990011	0.995189	0.997304	0.998339	0.998916	0.999174	0.999141	0.998847	0.99838	0.997877	0.997446	0.99716	0.997084	0.997244	0.99754	0.99789	0.998348	0.998881	0.99939	0.999786	0.999967	1	0.999987
	Var48	0.984664	-0.925654	-0.929574	-0.933698	-0.939389	-0.947271	-0.954921	-0.961711	-0.969766	-0.978314	-0.985657	-0.990111	-0.988746	-0.979379	-0.961758	-0.937459	-0.90768	-0.87187	-0.822513	-0.735398	-0.538011	-0.0139997	0.678275	0.919922	0.974827	0.989833	0.995014	0.997136	0.998189	0.998792	0.999078	0.999071	0.998799	0.99835	0.997862	0.997439	0.997154	0.997067	0.997212	0.997493	0.997828	0.998279	0.998809	0.999319	0.999727	0.999929	0.999987	1
	Var49	0.9848	-0.92467	-0.928621	-0.932774	-0.938494	-0.946418	-0.95411	-0.960932	-0.969032	-0.977644	-0.985052	-0.989614	-0.98846	-0.979382	-0.962061	-0.938059	-0.908587	-0.873091	-0.824065	-0.737382	-0.540699	-0.0175182	0.67544	0.918255	0.973761	0.989073	0.994437	0.996684	0.997841	0.998548	0.998942	0.999042	0.998868	0.998503	0.998077	0.997695	0.997425	0.997333	0.997452	0.997697	0.997993	0.998403	0.998893	0.999359	0.999724	0.999893	0.999937	0.999972
	Var50	0.985055	-0.922462	-0.926468	-0.930673	-0.936472	-0.944512	-0.95232	-0.959238	-0.967462	-0.976256	-0.983873	-0.988735	-0.988054	-0.979567	-0.96285	-0.939437	-0.910565	-0.875677	-0.827286	-0.741428	-0.54608	-0.0243898	0.670055	0.91518	0.971839	0.987718	0.99342	0.995895	0.997227	0.998102	0.998674	0.998955	0.998953	0.998735	0.998421	0.998106	0.997868	0.997777	0.997862	0.99805	0.998281	0.998615	0.99903	0.999416	0.999689	0.999773	0.999768	0.999813
	Var51	0.98528	-0.919199	-0.923261	-0.927532	-0.933445	-0.94165	-0.949621	-0.95667	-0.965056	-0.974092	-0.982008	-0.987314	-0.987312	-0.979637	-0.963725	-0.941121	-0.913117	-0.879116	-0.831628	-0.746938	-0.553503	-0.034022	0.662322	0.910637	0.968924	0.985602	0.991777	0.994563	0.99613	0.997227	0.998035	0.998564	0.998801	0.998795	0.998643	0.998429	0.99824	0.998157	0.998198	0.998303	0.998433	0.998658	0.998972	0.999255	0.999401	0.999356	0.999271	0.999323
	Var52	0.985059	-0.91554	-0.919624	-0.923951	-0.929986	-0.938339	-0.946436	-0.953569	-0.962048	-0.971257	-0.979422	-0.98515	-0.985842	-0.978986	-0.963866	-0.942114	-0.915117	-0.882194	-0.835782	-0.752452	-0.561299	-0.0447368	0.653109	0.90482	0.964929	0.982519	0.989236	0.992376	0.99421	0.995566	0.996651	0.997473	0.997997	0.998252	0.998306	0.998221	0.998099	0.998027	0.998009	0.998	0.997998	0.998092	0.9983	0.998486	0.998507	0.998328	0.998159	0.998225
	Var53	0.983865	-0.913335	-0.917369	-0.921695	-0.92777	-0.936127	-0.944175	-0.951216	-0.959556	-0.968649	-0.976733	-0.982505	-0.983496	-0.97705	-0.962314	-0.941098	-0.914928	-0.882983	-0.837523	-0.75535	-0.566248	-0.0528667	0.644878	0.898843	0.960344	0.978673	0.98585	0.989297	0.991374	0.992974	0.994323	0.99542	0.996218	0.996725	0.996981	0.997021	0.996959	0.996892	0.996804	0.996669	0.996529	0.996516	0.996667	0.996823	0.996803	0.996563	0.996354	0.996455
	Var54	0.981317	-0.91639	-0.920251	-0.924436	-0.93031	-0.938319	-0.945949	-0.952538	-0.960279	-0.96864	-0.975868	-0.980721	-0.980933	-0.973808	-0.958423	-0.936839	-0.910734	-0.879106	-0.83391	-0.751964	-0.563557	-0.0524368	0.642206	0.89526	0.956719	0.975142	0.982439	0.985992	0.988179	0.98991	0.991395	0.992628	0.993557	0.994186	0.994535	0.99462	0.994563	0.99447	0.99432	0.9941	0.993895	0.993887	0.994124	0.994435	0.994601	0.994496	0.994359	0.994531
	Var55	0.976387	-0.929045	-0.932547	-0.936341	-0.941582	-0.948643	-0.955248	-0.960805	-0.967197	-0.973801	-0.978855	-0.98111	-0.978627	-0.968892	-0.951063	-0.927498	-0.899973	-0.867304	-0.821005	-0.737498	-0.547117	-0.036089	0.650466	0.896854	0.955573	0.97284	0.979589	0.982848	0.984871	0.986482	0.987828	0.988898	0.989655	0.990118	0.990321	0.990271	0.990097	0.989919	0.989742	0.989559	0.989459	0.989682	0.990276	0.991077	0.991826	0.9922	0.992325	0.992609
	Var56	0.964309	-0.951785	-0.954659	-0.957696	-0.961666	-0.966907	-0.971625	-0.975331	-0.979302	-0.982682	-0.983687	-0.980973	-0.973096	-0.958064	-0.935342	-0.907612	-0.876627	-0.841051	-0.791842	-0.704517	-0.509026	0.00319638	0.672074	0.902645	0.954525	0.968767	0.973968	0.976347	0.977801	0.978919	0.979727	0.980207	0.980351	0.980229	0.979934	0.979487	0.979018	0.97867	0.97852	0.978552	0.978815	0.979593	0.980921	0.98268	0.984568	0.985905	0.98656	0.987012
	Var57	0.932829	-0.975711	-0.977609	-0.979406	-0.981292	-0.983607	-0.985353	-0.986181	-0.986382	-0.984712	-0.979375	-0.968859	-0.952452	-0.929092	-0.898817	-0.864636	-0.828128	-0.787843	-0.734138	-0.6413	-0.439201	0.0699014	0.702027	0.903217	0.94276	0.951575	0.953983	0.954764	0.955168	0.955365	0.955178	0.954587	0.953627	0.952456	0.951272	0.950136	0.949169	0.948551	0.948479	0.948921	0.949829	0.951519	0.953996	0.957236	0.960895	0.963754	0.965257	0.965949
	Var58	0.864889	-0.981333	-0.981878	-0.981941	-0.980958	-0.979278	-0.976981	-0.973906	-0.968988	-0.960501	-0.946712	-0.9259	-0.898325	-0.864219	-0.824431	-0.782295	-0.739072	-0.693236	-0.634618	-0.53648	-0.330334	0.16153	0.726329	0.881254	0.902415	0.903323	0.901708	0.900201	0.89911	0.89801	0.896455	0.89441	0.891971	0.889402	0.887036	0.884988	0.883368	0.8824	0.882439	0.883425	0.885173	0.888033	0.891967	0.897088	0.903019	0.90785	0.910457	0.911451
	Var59	0.752098	-0.950301	-0.949194	-0.947192	-0.942911	-0.936618	-0.929624	-0.921991	-0.911078	-0.894728	-0.871403	-0.839191	-0.799434	-0.753812	-0.704119	-0.654046	-0.604481	-0.553815	-0.491524	-0.390629	-0.187198	0.265983	0.729312	0.822969	0.821195	0.812508	0.806095	0.801887	0.799047	0.796477	0.793416	0.789802	0.785796	0.781769	0.778173	0.775168	0.772865	0.771536	0.771681	0.773204	0.775796	0.779857	0.785301	0.792399	0.800744	0.807676	0.811458	0.812769
	Var60	0.600093	-0.877982	-0.875025	-0.870838	-0.86326	-0.852286	-0.840446	-0.828065	-0.810864	-0.786439	-0.753614	-0.710324	-0.65898	-0.602611	-0.543961	-0.487194	-0.432899	-0.37931	-0.315665	-0.215805	-0.0235278	0.369294	0.703583	0.726844	0.700173	0.681372	0.670013	0.663047	0.65844	0.65444	0.649976	0.644939	0.639554	0.634284	0.629646	0.625817	0.622927	0.621295	0.621509	0.62343	0.62669	0.631777	0.638565	0.647475	0.658052	0.666907	0.671747	0.673339
	Var61	0.418538	-0.767905	-0.762976	-0.756639	-0.746056	-0.730703	-0.714226	-0.697246	-0.673899	-0.641767	-0.600205	-0.54705	-0.485688	-0.420262	-0.354357	-0.292769	-0.235957	-0.181879	-0.119595	-0.0248645	0.147884	0.461693	0.648072	0.597331	0.545951	0.517432	0.501444	0.491928	0.485693	0.48043	0.474792	0.468619	0.462187	0.456026	0.450656	0.446229	0.44292	0.441089	0.441334	0.443453	0.447115	0.452953	0.460819	0.471254	0.483704	0.494122	0.499789	0.501585
	Var62	0.221917	-0.628165	-0.621323	-0.61306	-0.600031	-0.580983	-0.560495	-0.539512	-0.510762	-0.472018	-0.423302	-0.362425	-0.293559	-0.221643	-0.150924	-0.0868759	-0.0300031	0.0220784	0.0803551	0.166175	0.312434	0.534777	0.566497	0.444438	0.37071	0.333718	0.31381	0.302158	0.294553	0.288266	0.281752	0.274803	0.267721	0.261072	0.255322	0.250566	0.247041	0.245144	0.24539	0.247509	0.251295	0.257551	0.26614	0.277687	0.291478	0.302946	0.309115	0.311002
	Var63	0.0323209	-0.475315	-0.466873	-0.457115	-0.442394	-0.420672	-0.397216	-0.373276	-0.340493	-0.296955	-0.243389	-0.177648	-0.104384	-0.02902	0.0437423	0.107905	0.162833	0.211188	0.263774	0.338507	0.455296	0.585273	0.472223	0.287982	0.195927	0.152217	0.12927	0.115975	0.107298	0.100239	0.0931451	0.0857621	0.0784001	0.0716216	0.065802	0.0609679	0.0574248	0.0555848	0.0558193	0.0577911	0.0614701	0.0678043	0.0766895	0.0888146	0.10329	0.115221	0.121548	0.123398
	Var64	-0.132509	-0.327879	-0.318299	-0.307535	-0.291839	-0.268476	-0.24315	-0.21737	-0.182045	-0.135618	-0.0794629	-0.0114646	0.0635732	0.139957	0.212668	0.275467	0.327618	0.371915	0.41875	0.482662	0.572024	0.620073	0.38362	0.148365	0.0417123	-0.00731465	-0.0326797	-0.0472936	-0.0568433	-0.064507	-0.0719964	-0.0796031	-0.0870265	-0.0937313	-0.0994448	-0.104198	-0.107631	-0.10934	-0.10912	-0.107358	-0.103913	-0.0977556	-0.088964	-0.0767802	-0.0622122	-0.0502903	-0.0440532	-0.0423285
	Var65	-0.269001	-0.19504	-0.184751	-0.173371	-0.15721	-0.132977	-0.106608	-0.0798293	-0.0431023	0.00480617	0.0619522	0.130481	0.205733	0.281831	0.353471	0.414463	0.46407	0.505058	0.54723	0.602195	0.668979	0.649839	0.311792	0.0340506	-0.0850819	-0.138827	-0.166431	-0.182295	-0.192671	-0.200897	-0.20873	-0.216504	-0.223933	-0.230519	-0.236086	-0.240703	-0.243973	-0.245529	-0.245321	-0.24377	-0.240592	-0.234755	-0.226337	-0.214486	-0.200227	-0.188589	-0.182559	-0.180998
	Var66	-0.38078	-0.0777715	-0.0671156	-0.0554047	-0.0391106	-0.0145276	0.012313	0.0395109	0.0768592	0.12531	0.182416	0.250415	0.325018	0.400194	0.470343	0.52957	0.577241	0.615941	0.654764	0.702915	0.752175	0.679572	0.25798	-0.0562552	-0.186742	-0.245014	-0.274874	-0.292028	-0.303245	-0.312033	-0.320206	-0.328149	-0.335586	-0.342063	-0.347493	-0.35196	-0.355049	-0.356455	-0.356265	-0.35491	-0.352002	-0.346568	-0.338715	-0.327472	-0.31378	-0.302572	-0.29679	-0.295401
	Var67	-0.468149	0.0213523	0.0321114	0.0439269	0.0601102	0.0846572	0.111539	0.138721	0.176104	0.224395	0.28073	0.347481	0.420847	0.494673	0.563088	0.620644	0.666877	0.704094	0.740639	0.78385	0.820146	0.706954	0.219824	-0.124244	-0.2645	-0.32684	-0.358799	-0.377169	-0.38917	-0.398462	-0.406923	-0.414997	-0.422416	-0.428773	-0.434059	-0.438364	-0.441269	-0.44254	-0.442377	-0.441208	-0.438575	-0.433595	-0.426417	-0.415947	-0.402978	-0.392283	-0.386765	-0.385534
	Var68	-0.529698	0.0972874	0.107977	0.119738	0.135662	0.15993	0.186572	0.213458	0.25049	0.298182	0.35336	0.41853	0.490387	0.562689	0.629342	0.685384	0.730534	0.766803	0.801883	0.841773	0.869271	0.728142	0.194961	-0.17068	-0.318282	-0.38379	-0.417424	-0.436773	-0.449391	-0.459056	-0.467701	-0.475829	-0.483181	-0.489391	-0.49452	-0.498661	-0.501396	-0.502558	-0.502432	-0.501434	-0.499062	-0.49453	-0.488022	-0.47834	-0.466114	-0.455936	-0.45067	-0.449568
	Var69	-0.568565	0.149499	0.16005	0.171691	0.187328	0.211249	0.237555	0.264052	0.300595	0.347571	0.401606	0.465294	0.535735	0.606651	0.671773	0.726556	0.770885	0.806519	0.840672	0.878478	0.900479	0.74196	0.179951	-0.199409	-0.351823	-0.419468	-0.454252	-0.474272	-0.487296	-0.497179	-0.505899	-0.514003	-0.521246	-0.527295	-0.532271	-0.536265	-0.538863	-0.539948	-0.539866	-0.539012	-0.536862	-0.532715	-0.526771	-0.517756	-0.506165	-0.49643	-0.491371	-0.490356
	Var70	-0.591904	0.183176	0.193597	0.20512	0.220531	0.244164	0.270173	0.296322	0.332408	0.378751	0.431883	0.494421	0.56371	0.633469	0.697325	0.751029	0.794597	0.82962	0.862997	0.89928	0.917564	0.748178	0.169356	-0.21756	-0.372553	-0.441345	-0.476745	-0.497115	-0.510332	-0.520286	-0.528983	-0.537	-0.5441	-0.549983	-0.554811	-0.558681	-0.561178	-0.562221	-0.562185	-0.561444	-0.559467	-0.555614	-0.550085	-0.54155	-0.530426	-0.521025	-0.516119	-0.515151
	Var71	-0.608053	0.20663	0.216953	0.228381	0.243642	0.267083	0.292879	0.318767	0.354474	0.400293	0.452753	0.51443	0.58274	0.651418	0.714068	0.766638	0.809232	0.843345	0.875656	0.910198	0.924797	0.74654	0.15713	-0.233093	-0.388832	-0.457883	-0.493398	-0.513812	-0.527024	-0.536918	-0.545503	-0.553371	-0.560297	-0.566006	-0.570688	-0.574447	-0.576871	-0.577896	-0.577906	-0.577249	-0.5754	-0.571759	-0.566505	-0.558279	-0.547473	-0.538309	-0.533516	-0.532565
	Var72	-0.625066	0.229482	0.23974	0.251089	0.266239	0.289525	0.315142	0.340815	0.376169	0.421473	0.473299	0.534128	0.601325	0.668664	0.729809	0.780856	0.821954	0.854537	0.885046	0.916841	0.926084	0.736652	0.137472	-0.253596	-0.408646	-0.477182	-0.512361	-0.532546	-0.545577	-0.555294	-0.563686	-0.571346	-0.578062	-0.583579	-0.588105	-0.59175	-0.594108	-0.595126	-0.595177	-0.594584	-0.592834	-0.58935	-0.584277	-0.576262	-0.565697	-0.556734	-0.552038	-0.551089
	Var73	-0.649403	0.260615	0.270817	0.282089	0.297111	0.320176	0.34554	0.370944	0.405849	0.450475	0.501444	0.561078	0.626628	0.691957	0.750891	0.799666	0.83844	0.868585	0.896186	0.923567	0.924384	0.718027	0.105649	-0.285189	-0.438418	-0.505756	-0.540195	-0.559906	-0.572602	-0.582037	-0.590157	-0.597546	-0.604005	-0.609293	-0.613631	-0.617137	-0.619416	-0.620416	-0.620502	-0.619969	-0.618312	-0.614969	-0.610052	-0.602243	-0.591949	-0.583219	-0.578643	-0.577699
	Var74	-0.683952	0.305602	0.315698	0.32683	0.341642	0.364343	0.389289	0.41425	0.448443	0.492028	0.541666	0.599453	0.662512	0.72485	0.780546	0.826024	0.861454	0.888136	0.911574	0.932576	0.92128	0.690763	0.0598105	-0.330463	-0.480968	-0.546534	-0.579891	-0.598919	-0.611142	-0.620191	-0.627947	-0.634978	-0.641099	-0.646092	-0.650183	-0.653499	-0.655662	-0.656629	-0.656748	-0.656289	-0.654751	-0.651585	-0.646884	-0.639384	-0.62949	-0.621096	-0.616692	-0.615763
	Var75	-0.727851	0.365735	0.375621	0.386496	0.400963	0.423096	0.447374	0.471611	0.50469	0.546692	0.594317	0.649386	0.708926	0.76713	0.818384	0.859385	0.890368	0.91255	0.930583	0.943249	0.916238	0.654755	0.000531551	-0.388635	-0.535533	-0.598786	-0.630749	-0.648899	-0.660513	-0.669064	-0.676347	-0.682911	-0.688589	-0.693189	-0.69695	-0.700005	-0.702006	-0.702919	-0.703081	-0.702725	-0.701353	-0.698444	-0.694085	-0.687073	-0.677775	-0.669863	-0.665699	-0.664799
	Var76	-0.777444	0.437768	0.447323	0.457814	0.471757	0.493041	0.516333	0.539521	0.571039	0.610851	0.655715	0.707146	0.762101	0.815023	0.860667	0.896087	0.921632	0.938414	0.950006	0.952733	0.907186	0.610059	-0.0693274	-0.455946	-0.598201	-0.658582	-0.688835	-0.705915	-0.716783	-0.724727	-0.731439	-0.737436	-0.74257	-0.746687	-0.750037	-0.752763	-0.754556	-0.755396	-0.755603	-0.755372	-0.75421	-0.751638	-0.747753	-0.741419	-0.732924	-0.72565	-0.721805	-0.720957
	Var77	-0.827264	0.514974	0.524074	0.534052	0.547299	0.567463	0.589469	0.611321	0.640894	0.677995	0.719475	0.766507	0.815974	0.86264	0.901736	0.930768	0.950196	0.960989	0.965478	0.957294	0.891702	0.557385	-0.145339	-0.526825	-0.66317	-0.720065	-0.748278	-0.764083	-0.774067	-0.781301	-0.787347	-0.792688	-0.797195	-0.800757	-0.803636	-0.805988	-0.80754	-0.80829	-0.808541	-0.808445	-0.807518	-0.805342	-0.802023	-0.796501	-0.788971	-0.782464	-0.779003	-0.778224
	Var78	-0.872574	0.591389	0.599918	0.609257	0.62168	0.640531	0.661023	0.681308	0.708633	0.74263	0.780234	0.822259	0.865551	0.905243	0.937133	0.959245	0.972139	0.976601	0.973635	0.954114	0.868101	0.497578	-0.223789	-0.596689	-0.725663	-0.778407	-0.804234	-0.818569	-0.827542	-0.83396	-0.839242	-0.843837	-0.847643	-0.85059	-0.852952	-0.854892	-0.856178	-0.856826	-0.857125	-0.857175	-0.856509	-0.854771	-0.852075	-0.847448	-0.840988	-0.835337	-0.832301	-0.831585
	Var79	-0.910519	0.663323	0.671195	0.679811	0.691309	0.708681	0.727465	0.745983	0.770807	0.801383	0.834703	0.871257	0.907949	0.94031	0.964712	0.979687	0.985873	0.983918	0.973486	0.942745	0.836956	0.433259	-0.300612	-0.661674	-0.782125	-0.830234	-0.853444	-0.866191	-0.874081	-0.879623	-0.884082	-0.887879	-0.890938	-0.893233	-0.895049	-0.896553	-0.897556	-0.898098	-0.898442	-0.898641	-0.898255	-0.89699	-0.894962	-0.891292	-0.885978	-0.881242	-0.878655	-0.878004
	Var80	-0.939493	0.727716	0.734886	0.742763	0.753284	0.769065	0.786024	0.802651	0.824785	0.851727	0.880576	0.911522	0.941582	0.96666	0.983666	0.991638	0.991335	0.983253	0.965745	0.924496	0.80066	0.368547	-0.371483	-0.718471	-0.829879	-0.873213	-0.893766	-0.90492	-0.911727	-0.916397	-0.920043	-0.923052	-0.925372	-0.927022	-0.928301	-0.929371	-0.930094	-0.930534	-0.930919	-0.931254	-0.931144	-0.930358	-0.929005	-0.92631	-0.922164	-0.918358	-0.916231	-0.915656
	Var81	-0.95922	0.781663	0.788138	0.795289	0.804843	0.819058	0.834229	0.848994	0.868445	0.891819	0.916421	0.942096	0.965891	0.984075	0.994091	0.995546	0.989345	0.975735	0.951841	0.901248	0.761839	0.306921	-0.433506	-0.76522	-0.867595	-0.906283	-0.924282	-0.933904	-0.93967	-0.943509	-0.946388	-0.948654	-0.950278	-0.951324	-0.952097	-0.952758	-0.953218	-0.953564	-0.953993	-0.954458	-0.954603	-0.954267	-0.953539	-0.951748	-0.948708	-0.945787	-0.944102	-0.943606
	Var82	-0.97147	0.824893	0.830733	0.837192	0.845818	0.858554	0.872062	0.885112	0.902093	0.922217	0.943011	0.963918	0.981976	0.99387	0.997581	0.993243	0.981832	0.963341	0.933869	0.875227	0.722699	0.250034	-0.486396	-0.802503	-0.896209	-0.930521	-0.94612	-0.954296	-0.959084	-0.962152	-0.964323	-0.965903	-0.966886	-0.967379	-0.967691	-0.967982	-0.968204	-0.968464	-0.968934	-0.969518	-0.969889	-0.969953	-0.96978	-0.968789	-0.966736	-0.96462	-0.963345	-0.962921
	Var83	-0.978242	0.858729	0.864014	0.869827	0.877586	0.88899	0.901023	0.912554	0.92736	0.944615	0.96198	0.97858	0.991562	0.998013	0.99635	0.987081	0.971194	0.948554	0.914454	0.849177	0.685947	0.199845	-0.530098	-0.831396	-0.917211	-0.947598	-0.961066	-0.967967	-0.971903	-0.974309	-0.975878	-0.976876	-0.97732	-0.97735	-0.977278	-0.97726	-0.977277	-0.977456	-0.977946	-0.978611	-0.979152	-0.979547	-0.979859	-0.979567	-0.97837	-0.976956	-0.976042	-0.975692
	Var84	-0.980726	0.884965	0.889749	0.894966	0.901938	0.912193	0.922953	0.933138	0.946038	0.96077	0.975063	0.987851	0.996472	0.998351	0.9922	0.978798	0.959183	0.933167	0.895343	0.824747	0.653117	0.157324	-0.564939	-0.852928	-0.931886	-0.95891	-0.970577	-0.976418	-0.979653	-0.981517	-0.98259	-0.983109	-0.98311	-0.982764	-0.982378	-0.982103	-0.981949	-0.982054	-0.982553	-0.983274	-0.983949	-0.984617	-0.98535	-0.985673	-0.985218	-0.984409	-0.983806	-0.983523
	Var85	-0.980126	0.905599	0.909921	0.914619	0.920903	0.93012	0.939718	0.948697	0.959926	0.972442	0.984039	0.993509	0.99834	0.996237	0.986183	0.969222	0.946484	0.917687	0.876751	0.801739	0.623355	0.120572	-0.593216	-0.869105	-0.942039	-0.966126	-0.976209	-0.981118	-0.983741	-0.985123	-0.985744	-0.985826	-0.985423	-0.984727	-0.98405	-0.983545	-0.983244	-0.983292	-0.983806	-0.984598	-0.985419	-0.98634	-0.987443	-0.988313	-0.988517	-0.988238	-0.987898	-0.987662
	Var86	-0.977986	0.921243	0.925195	0.929495	0.935229	0.943527	0.952079	0.960042	0.969892	0.98055	0.989889	0.996602	0.998264	0.99277	0.979392	0.959462	0.934163	0.903098	0.859632	0.781003	0.597077	0.0890377	-0.616386	-0.881503	-0.949195	-0.970745	-0.979451	-0.983545	-0.985635	-0.9866	-0.986835	-0.986547	-0.985802	-0.984805	-0.983878	-0.983178	-0.982755	-0.982754	-0.983279	-0.984137	-0.985097	-0.98624	-0.987642	-0.988953	-0.9897	-0.989853	-0.989722	-0.989518
	Var87	-0.975172	0.933657	0.937298	0.941263	0.946533	0.954046	0.961688	0.968761	0.977392	0.986414	0.99379	0.998127	0.997054	0.988642	0.972437	0.949991	0.922493	0.889485	0.843927	0.762315	0.573802	0.0617645	-0.635699	-0.891217	-0.954286	-0.973631	-0.981163	-0.984566	-0.986203	-0.986821	-0.986746	-0.986168	-0.985154	-0.983922	-0.982794	-0.981926	-0.981391	-0.981341	-0.981867	-0.982767	-0.983827	-0.985153	-0.986806	-0.988484	-0.989686	-0.990204	-0.990253	-0.990087
	Var88	-0.971717	0.944616	0.947935	0.951543	0.956357	0.96317	0.970004	0.976207	0.983586	0.990988	0.99651	0.998617	0.99496	0.983824	0.965028	0.940279	0.910711	0.875841	0.828321	0.744044	0.551663	0.0367177	-0.652654	-0.899116	-0.957864	-0.975151	-0.981598	-0.984369	-0.985591	-0.985892	-0.985541	-0.984705	-0.983457	-0.982024	-0.980721	-0.979697	-0.979051	-0.97895	-0.979481	-0.980414	-0.981548	-0.983027	-0.984916	-0.986944	-0.98858	-0.989456	-0.989693	-0.989575
	Var89	-0.967872	0.953928	0.95694	0.960199	0.964562	0.970708	0.976801	0.982193	0.988384	0.994265	0.998066	0.998117	0.9921	0.978474	0.957276	0.930398	0.898942	0.862331	0.812923	0.726171	0.53035	0.0130684	-0.668238	-0.90602	-0.960655	-0.975977	-0.981382	-0.983547	-0.984377	-0.984392	-0.983794	-0.982728	-0.981273	-0.979668	-0.97822	-0.977072	-0.97633	-0.976179	-0.976709	-0.977665	-0.978851	-0.980453	-0.982537	-0.984867	-0.9869	-0.988117	-0.988542	-0.988477
	Var90	-0.963667	0.961247	0.964007	0.966979	0.97092	0.976418	0.981826	0.986537	0.99177	0.996399	0.998703	0.996927	0.988869	0.97313	0.949854	0.921119	0.888097	0.850072	0.799066	0.710172	0.511346	-0.00785116	-0.681683	-0.911634	-0.962611	-0.976205	-0.980703	-0.98234	-0.982831	-0.982603	-0.981798	-0.980538	-0.978907	-0.977156	-0.975587	-0.974338	-0.973523	-0.973331	-0.973849	-0.974816	-0.976049	-0.977757	-0.979998	-0.982577	-0.984951	-0.986462	-0.987042	-0.987021
	Var91	-0.959441	0.966388	0.968948	0.971706	0.975302	0.980273	0.98515	0.989363	0.993915	0.997631	0.998784	0.995576	0.985949	0.968647	0.94387	0.913819	0.87975	0.840839	0.788821	0.698547	0.497856	-0.0220622	-0.689952	-0.914301	-0.962771	-0.975217	-0.979127	-0.980425	-0.980691	-0.980292	-0.979339	-0.97794	-0.976182	-0.974321	-0.972655	-0.97132	-0.970449	-0.970228	-0.970734	-0.971716	-0.973003	-0.974811	-0.977191	-0.979986	-0.982635	-0.984364	-0.985051	-0.985058
	Var92	-0.955524	0.970175	0.972556	0.975098	0.978401	0.982982	0.987456	0.991259	0.995241	0.998211	0.998447	0.994124	0.983282	0.964755	0.938824	0.907814	0.873013	0.8335	0.780802	0.68965	0.487925	-0.0317838	-0.694697	-0.914943	-0.961673	-0.973343	-0.976861	-0.977936	-0.97805	-0.977523	-0.976447	-0.97493	-0.973058	-0.971096	-0.969341	-0.96793	-0.967007	-0.96676	-0.967266	-0.968277	-0.969624	-0.97153	-0.97405	-0.977052	-0.979938	-0.981847	-0.982624	-0.982658
	Var93	-0.951525	0.974096	0.97628	0.978566	0.981574	0.985784	0.989812	0.993097	0.996392	0.998521	0.997792	0.992304	0.980114	0.960136	0.932814	0.900613	0.86482	0.82445	0.770825	0.678462	0.475178	-0.044773	-0.701738	-0.916699	-0.961096	-0.971684	-0.974629	-0.975373	-0.97527	-0.974567	-0.973316	-0.97162	-0.969582	-0.967474	-0.965598	-0.964096	-0.963112	-0.962835	-0.963353	-0.964408	-0.965821	-0.96783	-0.970507	-0.973733	-0.976872	-0.978988	-0.979881	-0.97994
	Var94	-0.94724	0.978172	0.980147	0.982198	0.984918	0.988707	0.992224	0.994935	0.997465	0.99864	0.996837	0.990059	0.976327	0.954686	0.925778	0.892158	0.855094	0.813608	0.758847	0.664969	0.459602	-0.0610272	-0.711052	-0.91956	-0.961045	-0.970256	-0.97246	-0.972769	-0.972382	-0.971458	-0.969999	-0.968099	-0.965872	-0.963604	-0.961598	-0.959995	-0.95895	-0.958653	-0.959187	-0.96027	-0.961729	-0.96383	-0.966667	-0.970124	-0.973527	-0.975864	-0.976879	-0.976957
	Var95	-0.943336	0.981251	0.983053	0.984946	0.987421	0.990811	0.993908	0.996207	0.998142	0.998505	0.995765	0.987904	0.972948	0.950048	0.919942	0.885236	0.847212	0.804913	0.749337	0.65436	0.447564	-0.0731602	-0.717525	-0.921116	-0.960438	-0.968631	-0.970293	-0.970286	-0.969694	-0.968616	-0.96702	-0.964991	-0.96265	-0.960285	-0.958199	-0.956532	-0.955448	-0.955143	-0.955678	-0.956759	-0.958236	-0.960407	-0.963362	-0.966995	-0.97061	-0.973117	-0.97422	-0.974318
	Var96	-0.940624	0.982944	0.984655	0.986471	0.988794	0.991913	0.994746	0.996824	0.998434	0.99831	0.99497	0.986436	0.97079	0.947209	0.916441	0.88116	0.842698	0.800069	0.744113	0.648587	0.44118	-0.0792264	-0.720331	-0.921385	-0.959642	-0.967336	-0.968732	-0.96858	-0.967904	-0.966764	-0.965117	-0.963047	-0.960669	-0.95827	-0.956155	-0.954464	-0.953363	-0.95305	-0.953574	-0.954644	-0.95614	-0.95836	-0.961369	-0.965084	-0.968822	-0.971433	-0.972587	-0.972704
	Var97	-0.938596	0.984196	0.985847	0.987616	0.989864	0.992791	0.995391	0.997269	0.998611	0.998122	0.994336	0.985256	0.969016	0.944826	0.913485	0.877745	0.838931	0.796012	0.739713	0.643701	0.435689	-0.0846532	-0.723097	-0.921927	-0.959216	-0.966458	-0.967613	-0.967322	-0.966565	-0.965366	-0.963663	-0.961545	-0.959124	-0.956685	-0.954542	-0.952828	-0.95171	-0.951384	-0.9519	-0.952973	-0.954496	-0.956758	-0.9598	-0.963568	-0.967403	-0.970104	-0.971304	-0.971435
	Var98	-0.93632	0.98562	0.987186	0.988887	0.991042	0.993764	0.996117	0.997751	0.998752	0.997847	0.99359	0.983892	0.966928	0.942008	0.910015	0.87373	0.83441	0.791017	0.734265	0.637671	0.428856	-0.0915605	-0.726761	-0.922744	-0.958767	-0.965434	-0.966291	-0.965819	-0.964938	-0.963645	-0.96186	-0.959663	-0.957169	-0.95467	-0.952479	-0.950726	-0.949577	-0.949231	-0.949743	-0.950829	-0.952378	-0.954684	-0.957779	-0.961626	-0.965579	-0.968389	-0.969645	-0.969788
	Var99	-0.933723	0.98689	0.988368	0.989977	0.991997	0.994523	0.996679	0.998103	0.998791	0.997513	0.992837	0.982596	0.964997	0.939438	0.906859	0.87007	0.830289	0.786476	0.729323	0.632218	0.422748	-0.0975453	-0.729667	-0.923075	-0.957978	-0.964142	-0.96474	-0.964109	-0.963114	-0.96173	-0.959864	-0.957583	-0.955009	-0.952444	-0.950198	-0.948395	-0.947209	-0.946848	-0.947365	-0.948467	-0.950041	-0.952397	-0.955568	-0.959514	-0.963585	-0.966494	-0.967803	-0.967956
	Values in bold are different from 0 with a significance level alpha=0.05
	Principal Component Analysis:
	Eigenvalues:
		F1	F2	F3	F4	F5	F6	F7	F8	F9	F10	F11	F12	F13	F14	F15	F16	F17	F18	F19	F20	F21	F22	F23	F24	F25	F26	F27	F28	F29	F30	F31	F32	F33	F34	F35	F36	F37	F38	F39	F40	F41	F42	F43	F44	F45	F46	F47	F48
	Eigenvalue	79.2059	17.1476	2.05299	0.323721	0.207792	0.0209348	0.0135339	0.00479987	0.00459772	0.00315338	0.00251585	0.00221323	0.00163032	0.00117215	0.00111901	0.000954437	0.000688625	0.000616413	0.000556229	0.000543539	0.000443535	0.000424817	0.000398075	0.000246994	0.00024462	0.000212973	0.000176555	0.000138454	0.000121698	0.000107873	9.53598e-05	9.08838e-05	6.30009e-05	4.46497e-05	4.38113e-05	3.29342e-05	2.36974e-05	1.77461e-05	1.62199e-05	1.09078e-05	9.58937e-06	8.09626e-06	7.2179e-06	5.61323e-06	4.67588e-06	3.14682e-06	2.54573e-06	2.28065e-06
	Variability (%)	80.006	17.3208	2.07373	0.326991	0.209891	0.0211463	0.0136706	0.00484835	0.00464416	0.00318523	0.00254126	0.00223559	0.00164679	0.00118399	0.00113031	0.000964078	0.000695581	0.00062264	0.000561848	0.000549029	0.000448015	0.000429108	0.000402096	0.000249488	0.000247091	0.000215124	0.000178338	0.000139852	0.000122927	0.000108963	9.6323e-05	9.18018e-05	6.36372e-05	4.51007e-05	4.42539e-05	3.32668e-05	2.39368e-05	1.79253e-05	1.63838e-05	1.10179e-05	9.68623e-06	8.17804e-06	7.29081e-06	5.66993e-06	4.72311e-06	3.1786e-06	2.57144e-06	2.30368e-06
	Cumulative %	80.006	97.3267	99.4005	99.7275	99.9373	99.9585	99.9722	99.977	99.9817	99.9848	99.9874	99.9896	99.9913	99.9924	99.9936	99.9945	99.9952	99.9959	99.9964	99.997	99.9974	99.9978	99.9983	99.9985	99.9987	99.999	99.9991	99.9993	99.9994	99.9995	99.9996	99.9997	99.9998	99.9998	99.9999	99.9999	99.9999	99.9999	99.9999	100	100	100	100	100	100	100	100	100
	Eigenvectors:
		F1	F2	F3	F4	F5	F6	F7	F8	F9	F10	F11	F12	F13	F14	F15	F16	F17	F18	F19	F20	F21	F22	F23	F24	F25	F26	F27	F28	F29	F30	F31	F32	F33	F34	F35	F36	F37	F38	F39	F40	F41	F42	F43	F44	F45	F46	F47	F48
	Var1	-0.110855	-0.0102567	0.0374992	-0.0683634	0.0606464	0.963808	-0.0842127	-0.0793525	0.137724	-0.00269037	-0.0073154	0.0819913	-0.03503	0.00771835	0.00901942	0.0209935	0.0290355	0.002212	0.00211415	-0.00687063	0.0300848	-0.0181136	0.0324226	-0.00514919	0.0032843	0.0213632	-0.0330279	0.0201198	0.016457	0.0178353	-0.0109848	-0.00964988	0.00182383	0.00257561	0.0140499	-0.0240357	-0.00430535	0.00645062	-0.000106118	-0.0018379	-0.00334869	0.00293256	0.00587974	-0.00309779	0.0129281	0.0151742	0.0018933	0.000954704
	Var2	0.102148	-0.0995752	0.017657	0.0104041	0.102012	-0.0243383	0.0840685	-0.0536323	-0.0193976	0.136222	0.242637	0.134858	0.0550384	0.29201	0.154477	-0.0373241	0.399222	0.127875	0.0165415	0.228771	0.108275	-0.0360912	-0.0595281	-0.0598334	-0.180721	-0.0549152	-0.0751774	-0.00550173	-0.14425	0.122582	-0.0884673	-0.0746483	0.0727868	0.339327	-0.0684116	-0.130852	-0.0414176	0.106015	-0.00611262	-0.0251275	0.0919548	-0.175561	0.195997	0.0991849	0.0535094	-0.0341742	0.0878559	0.155146
	Var3	0.102643	-0.0972908	0.0170887	0.00580401	0.0944327	-0.00757597	0.107238	-0.0439045	0.0276555	0.0981368	0.347331	0.0562363	-0.0672983	0.360138	0.0951032	0.00699951	0.150011	0.0763364	-0.023217	0.0976197	0.0861045	-0.186783	-0.0273198	0.0915512	0.117164	0.0949993	-0.0117966	0.0128511	0.0663262	-0.030021	0.224492	-0.122221	0.0274603	-0.253017	-0.0517215	0.0155476	-0.0372056	-0.14582	0.164882	0.022864	-0.0600542	-0.0114086	-0.192753	-0.075469	0.0464399	0.07541	-0.135644	-0.0980976
	Var4	0.103173	-0.0946718	0.0169075	0.00564929	0.0914801	-0.00524252	0.117385	-0.110333	0.0469971	0.0772539	0.362388	0.0492297	-0.217678	0.238858	-0.017136	0.173465	-0.214815	0.0201166	0.00716308	-0.0893332	-0.101516	-0.156281	0.0400642	0.0630448	0.125804	-0.0088408	0.0363007	0.0360811	0.0332385	-0.12079	0.0177842	0.160347	-0.043778	-0.149061	0.0819539	0.122856	0.00299952	-0.00561595	-0.190982	0.110576	0.00644783	0.123382	0.0695087	-0.0705573	-0.137005	0.038591	0.0618115	0.0389633
	Var5	0.103885	-0.0910365	0.0146922	0.0110671	0.0931474	-0.0238031	0.0920426	-0.252598	0.0475437	0.0624974	0.171997	0.0881816	-0.153013	-0.0228759	-0.135309	0.362533	-0.228158	-0.0784789	0.0622329	-0.125137	-0.123583	0.138919	0.0835106	0.0210235	0.0120717	-0.127958	-0.0303675	0.0833328	-0.0106827	-0.0176962	-0.238422	0.0319391	-0.0684278	0.0838898	0.00665273	0.042398	-0.150708	0.0833763	-0.0165317	-0.00346744	-0.0658742	-0.0147619	0.0223004	0.153042	0.174072	-0.13311	0.0173772	-0.0374408
	Var6	0.104902	-0.0854707	0.0126202	0.0131925	0.0953039	-0.0356069	0.0479478	-0.314853	0.0607293	0.0754757	-0.0625312	0.0424169	0.139838	-0.0958509	-0.200777	0.304643	0.144544	-0.112487	0.0242443	-0.0966099	1.5957e-05	0.282045	0.167004	0.0721191	-0.0135246	-0.00736866	-0.00245034	0.0226305	0.0802569	0.0816847	-0.093791	-0.2072	0.0900531	0.0342245	-0.0396494	0.0786885	-0.0303141	-0.0411581	0.221195	-0.0384705	0.0299294	-0.157073	0.0124654	-0.0349169	-0.112597	0.130365	-0.127175	-0.0679436
	Var7	0.105937	-0.0792908	0.0118247	0.0109476	0.101328	-0.0147503	0.0335824	-0.243865	0.126735	0.114444	-0.139786	-0.119145	0.339772	-0.025726	-0.178575	0.0490434	0.326388	-0.0248073	-0.087409	-0.0775201	0.0195177	0.0642482	0.14572	0.0325182	0.0410487	0.116395	0.11148	-0.0632247	0.0646571	-0.0834795	0.0862141	0.0441308	0.0686625	-0.150749	0.00435161	-0.0371867	0.102888	-0.0834264	-0.0728192	0.107657	0.0242477	0.0892154	0.0544753	-0.111489	-0.12017	-0.137229	0.0878098	0.156436
	Var8	0.106895	-0.0729681	0.0115188	0.00650491	0.111495	0.00830676	0.069297	-0.164067	0.195301	0.115429	-0.0551757	-0.254222	0.265301	-0.011433	-0.116279	-0.168843	0.122308	0.0293675	-0.159441	0.0428252	-0.141512	-0.194071	-0.0365155	-0.0959119	7.45181e-05	0.0322092	0.0255771	-0.106654	-0.00597276	-0.15541	-0.0332538	0.212584	-0.13434	-0.0904444	-0.00416941	-0.0699151	-0.144298	0.0746892	-0.0547194	-0.0232561	-0.0255587	0.150296	-0.0470505	0.184834	0.195097	-0.0261955	-0.0561878	-0.0678111
	Var9	0.108082	-0.0641379	0.0124832	-0.00162405	0.120927	0.0122606	0.131624	-0.147429	0.180604	0.054861	0.0891854	-0.239067	0.0347155	-0.129432	-0.0214258	-0.277389	-0.140175	-0.0229488	-0.047741	0.208025	-0.260252	-0.122549	-0.0452508	-0.134687	-0.0982082	-0.0155367	-0.0918277	-0.0554236	-0.0425578	0.0496692	-0.12043	-0.0824831	-0.119837	0.112228	0.00962988	0.073638	-0.00070254	0.0507806	-0.0728655	-0.136982	-0.0289065	-0.0671863	-0.0817415	-0.069594	-0.117851	0.24222	-0.0136429	-0.162486
	Var10	0.1094	-0.0524827	0.0134509	-0.00966402	0.128784	0.00723208	0.172589	-0.146878	0.13288	-0.0376746	0.16306	-0.0795993	-0.125608	-0.311812	0.167435	-0.210187	-0.178316	0.0163514	0.138022	0.137333	-0.0744903	0.141619	0.089341	-0.0431337	-0.0164866	0.0139828	0.0180375	-0.00333839	-0.115774	0.105074	0.146786	-0.236164	-0.0710441	0.0362709	0.00292481	-0.0621316	0.210485	-0.0549165	-0.070678	0.0505167	-0.0425354	-0.0215299	0.0311035	-0.110647	-0.103861	-0.162801	0.109754	0.194868
	Var11	0.110616	-0.038551	0.012125	-0.0152572	0.139642	-0.0229942	0.16571	-0.122038	0.130626	-0.0584546	0.0528005	0.132759	-0.0909608	-0.321492	0.340984	-0.0720316	-0.0298705	0.11028	0.0956747	-0.137503	0.245015	0.157577	0.023375	0.0359038	-0.0162152	0.0270179	0.0707477	-0.0829987	-0.0467185	-0.103599	0.239834	0.0814345	-0.0167616	-0.0528244	0.0285807	-0.0941852	-0.0584032	0.0283956	0.125422	-0.0153801	0.119944	0.0644803	0.0602372	0.158727	0.0541269	-0.0654723	-0.0718486	-0.0277364
	Var12	0.11159	-0.0214232	0.0119216	-0.0146525	0.148161	-0.057108	0.126632	-0.0765327	0.166869	-0.0169268	-0.208772	0.28374	0.0334631	-0.072326	0.293322	-0.00545925	-0.00505052	-0.0116839	-0.0717376	-0.170619	0.304483	-0.0523233	-0.132927	-0.019433	-0.134209	-0.0182527	-0.0754409	-0.0303405	0.0609565	-0.0253676	-0.123663	0.247976	0.0673298	-0.0376327	0.0709748	0.0427751	-0.0759284	0.0123484	-0.0761414	-0.101226	-0.0177878	0.0333123	-0.177758	-0.056356	0.0222944	0.201815	0.0205303	-0.0652488
	Var13	0.112024	-0.0016374	0.018664	-0.00524896	0.143305	-0.0489493	0.0790306	0.0239472	0.236393	0.00504244	-0.323125	0.282243	0.10185	0.181635	0.0673604	0.0130199	-0.196898	-0.182673	-0.114983	0.0966865	0.0649485	-0.112952	-0.118716	-0.0382643	0.0224894	-0.0274911	-0.065834	0.184023	0.0235768	0.163447	-0.167868	-0.0375255	-0.0333474	-0.0786484	-0.00102133	-0.0221667	0.0691771	-0.050422	-0.0997837	0.0679822	-0.103489	-0.0802235	0.0444948	-0.11731	0.0332872	-0.149812	0.0573099	0.129491
	Var14	0.111644	0.0192925	0.0315906	0.00446789	0.128214	-0.00219798	0.0512524	0.205803	0.255271	0.092281	-0.177178	0.119098	0.0819049	0.223113	-0.115572	-0.0329111	-0.3133	-0.108616	-0.0618825	0.220652	-0.090885	0.0980014	-0.0100916	0.0799955	0.116128	0.058676	0.156283	0.077109	0.0296403	0.0698697	0.169087	-0.0759258	0.0278755	0.0727584	-0.0542066	-0.101516	0.0269145	0.0365599	0.173562	0.0356557	0.0788448	-0.0285195	0.108088	0.13438	-0.0763201	-0.0774261	-0.0547991	-0.0558123
	Var15	0.110355	0.0397163	0.0473555	0.011352	0.111358	0.0432112	0.0769396	0.343464	0.181606	0.213428	-0.0279757	-0.131478	-0.0129228	0.128492	-0.165301	-0.0418581	-0.141215	0.106777	0.0297951	0.00914812	0.118678	0.244452	0.0903139	0.0649173	-0.0288718	-0.065138	0.133587	-0.132518	0.0025352	-0.0765023	0.18545	0.058662	0.188715	0.178876	0.0345032	0.0718382	-0.122032	0.0184101	-0.0399909	-0.0780738	0.0514877	0.0971815	-0.193511	0.0712153	0.00295325	0.102459	0.00579552	0.0314158
	Var16	0.108297	0.058243	0.0675535	0.0263136	0.0949797	0.0421751	0.12902	0.37356	0.151303	0.172161	0.0299956	-0.27664	-0.0927952	-0.02288	-0.0837599	0.0287963	0.109379	0.139579	0.0516645	-0.225924	0.226817	0.0712353	0.0382658	-0.045463	-0.041277	-0.21629	-0.11969	-0.0133626	-0.0455341	-0.0954992	-0.129734	-0.0327589	-0.0320452	-0.0794519	-0.0269273	0.102767	-0.0487755	0.0107945	-0.0595021	0.0622664	-0.0191975	-0.128183	0.0961925	-0.166212	0.0155129	-0.132459	0.0384509	0.0247069
	Var17	0.105596	0.0747427	0.0925956	0.0558338	0.077722	0.0159597	0.140174	0.35538	0.145458	-0.0214949	0.0648099	-0.105733	-0.0534087	-0.210687	0.0365672	0.122196	0.220072	-0.094393	-0.0239945	-0.108276	-0.101218	-0.109168	-0.0776088	0.0376674	0.0777162	-0.0458559	-0.166591	0.131917	0.0122744	0.00580302	-0.180702	-0.100915	-0.119812	-0.167722	-0.0810007	-0.0973405	0.162256	-0.0277995	0.149404	0.0400036	-0.111489	-0.0623905	0.120445	0.03141	0.0214443	0.0806781	-0.0404768	0.011433
	Var18	0.102198	0.0897409	0.121004	0.09315	0.0611959	0.0104732	0.119625	0.252434	0.0648928	-0.209314	0.0812874	0.185111	0.0312871	-0.273925	-0.0162691	0.18745	0.22169	-0.15846	0.0060894	0.210973	-0.224145	-0.14377	0.019968	0.178443	0.0328318	0.129079	0.0182707	0.0642091	0.0325838	-0.0139772	0.0441565	-0.0373044	0.0565698	0.0537712	0.0926262	0.0157032	-0.0541062	-0.0728018	-0.064177	-0.0332228	0.00832347	0.166964	-0.0908694	0.0844514	0.100905	0.0735326	-0.0228782	-0.00593732
	Var19	0.0973795	0.106196	0.154668	0.125501	0.048193	0.0158991	0.110646	0.0601408	-0.00432662	-0.338553	0.0772204	0.227487	0.0442618	-0.0659541	-0.269002	0.0726109	0.0987338	0.0689545	0.0936246	0.138594	0.0621848	-0.131886	0.110489	0.0825048	-0.12099	0.0930035	0.148682	-0.139078	-0.0658414	-0.0224988	0.0515938	0.104622	-0.00658197	0.100837	0.0517786	0.13849	-0.0157075	0.0839943	-0.116466	0.029505	0.0303209	-0.0508848	0.0102552	-0.107626	-0.100737	-0.0650947	0.036913	-0.0586976
	Var20	0.0886175	0.129083	0.201038	0.157618	0.0360045	0.0110637	0.101608	-0.102238	0.00174302	-0.421213	0.0341062	0.0135028	-0.0326052	0.189311	-0.304442	-0.15993	-0.0541333	0.0685839	0.0267416	-0.229692	0.13741	-0.0244116	-0.0151712	-0.162356	0.000291973	0.0316605	0.0831682	-0.134737	-0.0972412	0.0254313	-0.0326552	0.0521658	-0.0576955	-0.0140551	-0.0750956	-0.0446529	0.121555	0.0333054	0.0442909	-0.0830948	-0.0910254	-0.117663	-0.0271023	0.0702981	-0.0175283	0.000563175	-0.00167925	0.0595054
	Var21	0.0680172	0.163804	0.277312	0.213117	0.0150945	0.0124499	0.0720076	-0.164613	0.0121823	-0.309305	-0.0951284	-0.269622	-0.149737	0.203884	0.0842828	-0.110801	-0.0258875	-0.111899	-0.0428022	-0.120137	-0.0551547	0.086876	-0.0753435	-0.0931924	0.135198	0.0496927	-0.142008	0.0884223	0.092372	-0.0239068	0.00313163	-0.112845	0.135372	0.0500248	0.0290495	-0.0830702	-0.194914	-0.03783	0.11375	0.0324475	0.167868	0.023759	0.0135357	-0.0690179	0.132609	0.000300461	0.0450349	-0.000298505
	Var22	0.0107589	0.197359	0.380029	0.280701	-0.0219301	0.012498	0.0144338	-0.167771	-0.094011	0.182014	-0.250415	-0.229019	-0.223215	0.0379741	0.264758	0.20977	0.0541892	0.0383842	-0.0475129	0.267911	0.00748712	-0.00444968	0.0909787	0.109733	-0.0292156	-0.0497249	-0.0666441	-0.0216282	0.0813706	0.0420808	0.0304504	0.0543621	0.0901218	0.0290285	-0.0340729	0.0781342	0.0694093	0.0626775	-0.0926252	0.0238799	-0.0575391	0.0572104	0.00921478	0.0568048	-0.12368	0.0191692	-0.0562647	-0.0507964
	Var23	-0.069196	0.146687	0.337894	0.223172	-0.0354217	-0.00574018	-0.0203014	-0.0972225	-0.142216	0.451552	-0.0935337	0.239047	-0.0971349	-0.108726	-0.119202	-0.081426	-0.00688824	0.0674704	-0.00492025	-0.0217285	0.0413448	-0.129128	0.0100758	0.00888326	0.00854904	-0.0424786	0.178391	-0.0450665	-0.203367	0.000351662	0.0209262	-0.0226528	-0.184726	-0.0841195	-0.0419609	-0.0411418	0.0987461	-0.0568618	0.0547853	-0.0839279	-0.0710046	-0.00607062	-0.0720102	0.0206797	0.125298	-0.0352465	0.0532494	0.00282062
	Var24	-0.0994136	0.0797228	0.223855	0.119338	-0.0267185	-0.00789324	-0.0124571	-0.0294994	-0.0188169	0.227835	0.118776	0.253804	0.146026	-0.0950629	-0.149511	-0.316308	-0.0165456	-0.0300002	0.125615	-0.180458	-0.105252	0.0454311	-0.213338	0.0863731	0.0708866	0.0771437	-0.143852	0.117156	-0.090016	-0.0450379	-0.0198971	-0.0782346	0.0440684	-0.0100846	0.0612437	0.0065726	-0.130809	-0.0299764	0.0643301	0.162442	0.13617	-0.0327779	0.0158702	-0.0618706	-0.0970183	0.107289	0.0413701	0.0500529
	Var25	-0.107156	0.0467747	0.157953	0.0641469	-0.0228565	-0.00563414	-0.00740554	-0.000976592	0.0367443	0.0547345	0.207115	0.0507486	0.278146	-0.0202143	0.0237299	-0.141861	-0.0429086	0.0177707	0.192861	-0.053537	-0.0745234	0.170776	-0.168095	0.112784	0.0554048	0.0263029	-0.228899	0.0989731	0.149143	0.0599988	-0.025755	0.127619	0.207857	-0.0216688	-0.0423978	0.112392	-0.0172865	0.0342543	-0.17786	-0.00551493	-0.104563	0.0102769	0.01379	0.114978	-0.0513507	-0.152486	-0.17196	-0.0694028
	Var26	-0.109627	0.0308755	0.1227	0.0378468	-0.0181222	-0.00339215	0.00195696	0.0228988	0.0290634	0.00805404	0.210836	-0.0813863	0.272575	0.00307343	0.0952709	0.0480232	-0.0935837	-0.00877003	0.1757	0.0550136	0.021786	0.0967747	0.0276381	0.022813	0.0231856	-0.0127825	-0.032738	0.0525483	0.20428	0.0935064	-0.0464187	0.220815	0.107857	0.0216416	-0.0970579	0.0153404	0.117649	0.0229304	0.0247557	-0.14821	-0.0911868	-0.00746939	-0.0434009	-0.103579	0.222897	-0.126287	0.200598	-0.0519698
	Var27	-0.110635	0.0223587	0.102379	0.0218375	-0.0113644	-0.00552029	0.013652	0.0312487	0.0143937	0.00384319	0.155652	-0.115238	0.215271	-0.0269295	0.0846547	0.108617	-0.121737	-0.094709	0.0792131	0.0745585	0.095443	-0.0450386	0.119895	-0.0505455	-0.0340765	0.0074284	0.111118	0.045139	0.0773186	-0.00876513	-0.0601552	0.123936	-0.00155324	0.0793139	-0.0152523	-0.151484	0.0964492	-0.0296557	0.258432	-0.0266437	0.0869946	-0.0711778	-0.124727	-0.123453	0.116159	0.161541	0.271619	0.0348379
	Var28	-0.111122	0.0173463	0.089897	0.0112934	-0.00269533	-0.00799222	0.0176332	0.0236962	0.00351381	0.0030793	0.105914	-0.0906398	0.160565	-0.0284667	0.0785798	0.104376	-0.134783	-0.111653	0.00171688	0.0392068	0.136715	-0.117564	0.06854	-0.0675956	-0.0720537	0.0237736	0.137836	0.0721408	-0.0505747	-0.0946143	-0.0875477	-0.0174742	-0.0619982	0.0703485	0.0446537	-0.170516	-0.055902	-0.0588777	0.116133	0.0942287	0.146944	-0.092334	-0.156811	0.0346828	-0.0743257	0.141807	-0.217732	-0.0282739
	Var29	-0.111393	0.0140433	0.0816088	0.00309389	0.0101007	-0.00481328	0.0129251	0.018073	-0.00180095	0.00996701	0.0820077	-0.0616149	0.116238	0.00245878	0.0700248	0.0971905	-0.123144	-0.0828385	-0.00131247	0.00244567	0.141284	-0.102737	-0.00852205	-0.072072	-0.044844	0.0204406	0.126264	0.0679619	-0.111718	-0.118145	-0.164782	-0.0716264	-0.0921229	0.0331654	0.0389136	-0.0515648	-0.109274	-0.051619	-0.0966504	0.0861059	0.0981489	-0.0187828	-0.0230415	0.0408336	-0.117803	-0.0170261	-0.261739	-0.0407342
	Var30	-0.111556	0.011476	0.0758757	-0.0059889	0.0276789	-0.00256356	0.00809363	0.0165301	-0.00238825	0.0146111	0.0628579	-0.0477799	0.077604	0.011869	0.0398388	0.0867435	-0.0743134	-0.0741514	0.00722862	0.00458142	0.111599	-0.0650972	-0.0345044	-0.0983461	0.0153573	0.00705234	0.100624	0.0186645	-0.0970281	-0.132122	-0.1688	-0.0276948	-0.0486703	0.0066096	0.0467621	0.00228503	-0.0226906	-0.050451	-0.0977559	0.0151289	0.0630722	0.104742	0.171423	-0.027638	-0.101425	0.00988322	0.0709217	0.137732
	Var31	-0.111653	0.00911961	0.0717694	-0.0169706	0.0476231	-0.00845039	0.0062595	0.016403	-0.00280913	0.00651613	0.0401567	-0.0268225	0.0460908	0.00184827	0.00830448	0.056946	-0.0200147	-0.0647049	-0.00899686	0.0351255	0.0633135	-0.033353	-0.0193525	-0.113795	0.0462604	-0.00636391	0.0410558	0.000549576	-0.0462746	-0.140784	-0.0757308	0.0369414	0.0356526	-0.00260332	0.0817233	-0.0311498	0.0441513	-0.0636275	-0.0277457	-0.103971	0.0804018	0.156018	0.193115	-0.0439344	-0.153034	-0.0022044	0.126027	0.236275
	Var32	-0.1117	0.0068406	0.0686817	-0.0296028	0.0679616	-0.0172864	0.00390206	0.0202099	-0.006852	-0.00872694	0.0194643	0.00609009	0.0238581	-0.00301856	-0.00219374	0.0209911	0.0171839	-0.0213014	-0.0369226	0.0582916	0.0190697	0.00171996	0.00331988	-0.0914107	0.0276022	-0.0190738	-0.0272187	0.00765046	-0.0259956	-0.12712	-0.00665298	0.0622171	0.0674767	0.00934264	0.116639	-0.0484877	-0.00107589	-0.0297236	-0.0181633	-0.213451	0.0168552	0.0885934	0.0830276	-0.0141963	-0.257919	-0.150951	-0.030953	0.00953106
	Var33	-0.111701	0.00471782	0.0666686	-0.0430266	0.0876865	-0.0223112	0.00258524	0.0272478	-0.0138237	-0.0193061	0.00750378	0.0380144	0.00598451	-0.0107755	-0.00411828	-0.00263356	0.0360118	0.022504	-0.0794817	0.0652628	-0.0125417	0.0353797	0.0193521	-0.0812896	-0.0276807	-0.0331324	-0.0813696	-0.00807577	-0.0175048	-0.0811917	0.0113344	0.0589146	0.00914913	0.0506536	0.118783	-0.0248477	-0.124286	0.0231975	0.00860862	-0.0732546	-0.157239	-0.00592767	0.0649976	0.0169299	-0.217087	-0.178716	-0.0897952	-0.201014
	Var34	-0.111668	0.00287113	0.0655689	-0.0560656	0.104684	-0.023585	0.00366562	0.0311776	-0.0241617	-0.0206202	0.00156335	0.0601189	-0.0130583	-0.023182	-0.0097497	-0.0194778	0.0365499	0.0263992	-0.122109	0.0634772	-0.0278799	0.0619636	0.0254401	-0.0991063	-0.0823256	-0.0365782	-0.112154	-0.0437212	0.0239205	-0.0400331	0.0127838	0.0490431	-0.0939162	0.093779	0.0610725	0.03698	-0.210094	0.0171508	0.0821725	0.25681	-0.221423	-0.0560679	0.0618354	0.028797	-0.062892	-0.093236	0.00208251	-0.0649497
	Var35	-0.111628	0.00132519	0.0649097	-0.0665759	0.11741	-0.0209666	0.00567889	0.0287853	-0.0372614	-0.0197444	-0.00107185	0.0625556	-0.0269721	-0.0194304	-0.00467281	-0.02668	0.0245476	0.0023922	-0.129916	0.0537227	-0.0370113	0.0763359	0.0226019	-0.0844183	-0.0984962	-0.0329931	-0.099856	-0.0977789	0.0819209	-0.0404021	-0.00738194	0.011415	-0.113102	0.112585	-0.00743441	0.109492	-0.177499	-0.0823132	0.0853385	0.353213	-0.0257744	-0.062198	-0.0757324	0.0171501	0.0247237	-0.0107815	0.115884	0.0722782
	Var36	-0.111593	8.57836e-05	0.0647802	-0.0730214	0.125418	-0.0155682	0.00993545	0.0252156	-0.0436587	-0.0264659	0.00153475	0.0412989	-0.0306665	-0.00298609	0.011571	-0.00868011	0.0127277	-0.0198792	-0.104683	0.0428455	-0.0465433	0.0671246	0.00501464	-0.031309	-0.0892896	-0.0290036	-0.0747908	-0.141486	0.107304	-0.0405649	-0.0448242	-0.0618023	0.00290259	0.0618082	-0.022932	0.145707	-0.0553043	-0.203797	0.0115821	0.154617	0.249352	-0.00744077	-0.166943	0.0475254	0.00920252	-0.0157928	0.125338	0.0219619
	Var37	-0.111568	-0.000741113	0.0652802	-0.0766566	0.127727	-0.0123773	0.0186719	0.0258691	-0.0420578	-0.039514	0.00833952	0.0171777	-0.0266496	0.0163605	0.0257677	0.0105592	0.0227637	-0.0284655	-0.0696375	0.0257583	-0.0477118	0.0499002	-0.0426301	0.00546807	-0.0826284	-0.0104166	-0.0665809	-0.109744	0.106173	-0.0117779	-0.0498409	-0.119805	0.0687615	-0.0949049	-0.0106365	0.101417	0.0316943	-0.114718	-0.0652354	-0.128473	0.303219	0.0513453	-0.156705	0.0700851	-0.090565	-0.114163	0.00913303	0.0238624
	Var38	-0.111566	-0.00110917	0.0658747	-0.0781039	0.123438	-0.0137548	0.0303	0.0274757	-0.0433906	-0.0447773	0.0195096	0.0214312	-0.0131695	0.0310801	0.0303001	0.00766931	0.0404327	-0.0344486	-0.0550334	-0.0114217	-0.0442143	0.0692997	-0.0936747	-0.00717329	-0.0683821	-0.0124004	-0.0209792	-0.0245955	0.0905542	0.0113422	-0.010378	-0.126226	0.00743352	-0.238081	-0.0540564	-0.000533594	-0.0314018	0.131715	-0.114168	-0.29436	0.0983436	-0.0202949	-0.112252	0.0421387	-0.151188	-0.00956405	-0.0391352	0.0221059
	Var39	-0.111598	-0.00104911	0.0658162	-0.0751457	0.114985	-0.0163636	0.0368558	0.0287929	-0.0423639	-0.0308146	0.0351285	0.0389348	0.00120164	0.0168608	0.0122351	-0.00144889	0.0244123	-0.0345694	-0.0678972	-0.0349784	-0.0310507	0.100966	-0.0815223	-0.0489342	-0.0516037	-0.0574953	0.0681696	0.0149519	0.012082	0.0358812	0.0106943	-0.0987517	-0.00839815	-0.275078	-0.117811	-0.00928334	-0.0792338	0.248347	0.0587109	-0.0892618	-0.0695392	-0.0123477	0.00128226	0.0706984	-0.0810272	0.176189	0.122527	-0.0689268
	Var40	-0.111653	-0.000669149	0.0650358	-0.0678013	0.10647	-0.0186377	0.0347016	0.0300381	-0.0199249	-0.0113626	0.0498657	0.0294653	0.00988208	0.0164331	-0.0129809	-0.0172214	-0.00464583	0.0180455	-0.0876322	-0.0290087	-0.0237416	0.069263	0.00349329	-0.0567108	-0.0714279	-0.0738613	0.0897235	-0.00475632	-0.0886761	0.142837	-0.022689	-0.0431851	0.0239856	-0.181342	-0.0366585	0.0972312	0.0792575	0.19668	0.315929	0.133313	0.0129774	0.268676	0.0690131	-0.0012193	-0.00329911	0.0101696	0.0979791	-0.142597
	Var41	-0.111708	0.000103143	0.0639204	-0.0593767	0.0980461	-0.0224341	0.0353789	0.0307347	0.00449961	-0.010466	0.0539017	-0.00394422	0.0122889	0.0701791	-0.0109059	-0.0334725	0.00459937	0.0992937	-0.102499	-0.0513946	-0.0149931	0.00716749	0.106572	0.00919908	-0.112125	-0.0176294	0.00944186	-0.0152011	-0.0849364	0.301111	-0.0933739	0.0243924	-0.0394736	0.0173766	0.125001	0.0887133	0.178564	0.034656	0.236664	-0.0651385	0.0396834	0.313822	0.0224647	-0.113519	-0.0739375	-0.104507	-0.169968	-0.069361
	Var42	-0.111771	0.00144966	0.0617943	-0.0524603	0.0883322	-0.0242067	0.0424318	0.0339261	-0.000179708	-0.0128254	0.0389075	-0.0319014	-0.005075	0.0886137	0.00546939	-0.029275	0.0198205	0.0951695	-0.099791	-0.109613	-0.0101955	-0.0116645	0.163259	0.0904479	-0.0864261	0.041308	-0.0411222	0.00100912	0.0428043	0.322291	-0.11657	0.0790582	-0.161029	0.072529	0.138951	-0.0875626	0.0938319	-0.121726	-0.033212	-0.155223	-0.119266	0.0112491	-0.0867933	0.112003	-0.0636179	-0.02389	-0.0470699	0.0538281
	Var43	-0.111846	0.00330675	0.0581136	-0.0489548	0.0758239	-0.0220902	0.041337	0.0303986	-0.00137654	-0.00534359	0.0135367	-0.0381976	-0.0317053	0.0268536	0.0174542	-0.00732602	0.00220398	0.0331225	-0.0952857	-0.149915	-0.0845435	-0.0158057	0.107719	0.0952191	-0.0423951	0.0529145	0.0168336	-0.00592552	0.132998	0.239483	0.034652	0.148226	-0.155709	-0.0421593	-0.00661984	-0.196137	0.0222244	-0.141537	-0.194553	0.0958442	-0.0228812	-0.150034	-0.0741567	0.183975	0.0655158	-0.0428925	0.138274	0.0182176
	Var44	-0.111897	0.00599857	0.054134	-0.0478109	0.0624944	-0.0206222	0.0361962	0.0162484	0.0185939	0.00541611	-0.00615572	-0.0364617	-0.0451626	-0.0245641	0.0230373	0.0209383	-0.00898169	0.0234295	-0.0868592	-0.143847	-0.122404	-0.0279087	0.0165788	0.0870977	-0.0528536	0.0747233	0.0782407	-0.00407043	0.101514	0.184196	0.202634	0.208835	-0.0231295	-0.0642565	-0.167325	-0.143221	-0.0391422	-0.071713	-0.1342	0.152071	0.18568	-0.184864	0.184142	-0.138996	-0.0784162	0.0771318	-0.120981	0.024701
	Var45	-0.111897	0.00938821	0.0512081	-0.0452915	0.0555437	-0.0200512	0.0355554	0.00815733	0.0219011	0.0210033	-0.00780043	-0.039435	-0.017722	-0.030577	0.0250214	0.0370038	-0.0187572	0.00832014	-0.0670398	-0.10438	-0.059362	-0.0327444	-0.00419252	0.10724	-0.0321497	0.110857	0.0763298	0.011994	0.0151308	0.0974683	0.154026	0.143393	0.00401899	0.081198	-0.117376	0.00688276	-0.0785826	0.0121648	0.0227935	-0.0790012	0.127358	-0.0427745	0.36043	-0.133096	-0.0230636	0.130251	-0.110314	0.00345105
	Var46	-0.111864	0.0122293	0.049607	-0.0406232	0.0560523	-0.0147343	0.0328936	0.0112235	0.0013128	0.0255468	0.0125139	-0.0433821	0.038513	-0.0365636	0.0277834	0.0410418	-0.0468899	-0.0476368	-0.0836449	-0.0696113	-0.0202418	-0.0276989	-0.017779	0.0767849	-0.00651368	0.109785	0.0680329	-0.0544327	-0.0593736	0.0435233	0.0786009	-0.0476397	-0.0548307	0.150009	0.0442737	0.162449	-0.10035	0.0512612	-0.0470924	-0.123045	-0.0544314	0.156163	0.230251	-0.00278836	0.289196	0.0892828	0.0527085	-0.0187312
	Var47	-0.111834	0.0137208	0.0488866	-0.0368581	0.0602885	-0.00528619	0.0239131	0.00958501	-0.0251961	0.0176632	0.0371277	-0.0510906	0.0642803	-0.0458787	0.0303551	0.0556522	-0.0591736	-0.0804457	-0.102569	-0.037868	0.0131416	-0.00667024	-0.0463747	0.0302075	-0.0101311	0.0779604	0.0932102	-0.152356	-0.0586312	0.0483802	0.0974237	-0.186547	-0.0358297	0.0496369	0.0295462	0.144143	-0.100332	0.0415954	-0.154749	0.0728493	-0.155416	0.0369525	-0.0171779	-0.0876982	0.243671	-0.0088	-0.0449315	0.0586129
	Var48	-0.111823	0.0140487	0.0479622	-0.0371108	0.0681142	-0.00142974	0.0132126	0.00484777	-0.0418211	0.00523484	0.048324	-0.0544718	0.0581129	-0.04175	0.0311869	0.0745873	-0.0458718	-0.0882777	-0.0740585	-0.00990269	0.0575651	-0.00313677	-0.0557524	-0.00770613	-4.84003e-05	0.0535182	0.112901	-0.171927	-0.0169305	0.0153258	0.0900991	-0.191063	0.0598587	-0.0411982	-0.049933	-0.0368581	-0.0338376	0.0752461	-0.0902545	0.108373	-0.157867	-0.156329	-0.147724	-0.0772535	0.0609509	-0.15725	-0.0380377	0.0459637
	Var49	-0.111827	0.0135515	0.0463733	-0.0429486	0.0794045	-0.00869349	0.00865715	0.00545618	-0.0390386	-0.00391303	0.0412176	-0.0324321	0.0358097	-0.0242191	0.0185127	0.0667253	-0.0246692	-0.0785404	-0.0514796	-0.00173952	0.0463856	-0.0115013	-0.033199	-0.0446876	0.0326644	0.034609	0.0948623	-0.105662	0.00880078	-0.0450835	0.0638524	-0.139732	0.152094	-0.0821762	-0.021479	-0.140403	0.0282995	0.11385	-0.0407844	-0.014846	-0.181084	-0.164457	-0.072506	0.021564	0.033092	-0.0928421	-0.00130978	0.0591435
	Var50	-0.111828	0.0123433	0.0445345	-0.0569844	0.0912793	-0.023818	0.0108027	0.00411601	-0.0212132	-0.00676657	0.0170598	0.0181968	-0.00527562	0.000563802	-0.0117928	0.032396	-0.00174836	-0.0282019	-0.0661373	0.000814314	-0.0161942	0.0140133	0.0165524	-0.0653407	0.0622856	0.00434912	0.0429261	-0.0113304	-0.00176804	-0.113276	0.0520857	-0.0905767	0.163414	-0.075036	0.0733779	-0.110901	0.030144	0.0975421	-0.0648608	-0.105509	-0.163133	-0.103831	0.0848845	0.0679455	0.0850725	0.0830283	-0.0519138	0.0946007
	Var51	-0.111792	0.0106543	0.0425522	-0.0828147	0.102199	-0.0403984	0.0167904	-0.00570497	-0.000426825	-0.00891219	-0.015691	0.0693207	-0.0548846	0.0186435	-0.0500204	-0.00353401	0.0150195	0.0529917	-0.0910012	0.0140895	-0.0708105	0.0574355	0.0714809	-0.0630146	0.0705536	-0.0219179	-0.0325033	0.0598423	-0.0333137	-0.175734	0.02492	-0.0300029	0.12637	-0.0126231	0.118276	-0.0739817	0.0437189	0.0238192	-0.0685635	-0.114053	-0.0291638	-0.102346	0.171168	0.0889027	0.141819	0.156631	0.00985917	-0.0158284
	Var52	-0.111671	0.00910263	0.0398895	-0.120857	0.113948	-0.0517125	0.0279519	-0.020663	0.00841655	-0.0069723	-0.0415854	0.089431	-0.0953313	0.0183949	-0.0782581	-0.0317153	0.0240382	0.107893	-0.0877703	0.0286315	-0.0907724	0.0720837	0.105312	-0.0288323	0.0770634	-0.0263296	-0.0970994	0.0988156	-0.0455326	-0.184385	-0.00732583	0.025258	0.103409	0.0630548	0.0738768	-0.0869595	0.107458	-0.0620985	-0.0389145	-0.0791392	0.0602948	-0.0578375	0.0799282	0.00708389	0.17078	0.117311	0.0901496	-0.0740774
	Var53	-0.111447	0.00888884	0.0351862	-0.163897	0.129304	-0.0526469	0.0457084	-0.0376685	-0.00258626	0.00355416	-0.0570017	0.0638262	-0.117595	0.0070763	-0.0892447	-0.043319	0.040512	0.0879312	-0.0195659	0.0342331	-0.0644476	0.0436145	0.0909234	0.0156019	0.102569	-0.00673502	-0.107441	0.104374	-0.035165	-0.140529	-0.0172185	0.0470629	0.07199	0.111294	-0.003985	-0.109109	0.141581	-0.0638126	-0.0151016	-0.0415212	0.0169111	0.0640951	-0.137244	-0.165036	0.135225	0.0062427	-0.0134524	0.070652
	Var54	-0.111173	0.0119428	0.0260374	-0.196747	0.147491	-0.0436673	0.0644925	-0.0508467	-0.0203305	0.014031	-0.0739447	0.00389644	-0.119186	-0.00400187	-0.0931712	-0.0298147	0.0648137	0.00877149	0.110063	0.0364287	0.00945856	-0.0173502	0.0206997	0.0270395	0.133492	0.0183318	-0.0669188	0.0760793	-0.0201259	-0.0792857	-0.0143447	0.0642278	0.00655803	0.10537	-0.0547171	-0.0772304	0.109644	0.0341575	-0.0100651	0.0374459	-0.0469656	0.10278	-0.227476	-0.206256	0.0314688	-0.0226057	-0.123261	0.0960926
	Var55	-0.110868	0.0206335	0.00952018	-0.201205	0.164267	-0.0309942	0.0731858	-0.0548561	-0.0269947	0.0138686	-0.0936259	-0.058901	-0.0996256	-0.00774619	-0.0874153	-0.0148436	0.0796319	-0.0660936	0.23394	0.0406782	0.087286	-0.0824492	-0.0627751	0.0144218	0.142995	0.0267366	-0.0142989	0.0465977	-0.00466521	-0.00537897	-0.000147676	0.0900838	-0.066479	0.0784382	-0.0664651	0.0192877	0.0464994	0.114176	0.0347035	0.111191	-0.0517115	0.00630989	-0.1043	-0.0815766	-0.0250852	0.0466583	-0.100313	-0.0866672
	Var56	-0.110115	0.0371859	-0.0172889	-0.161611	0.178498	-0.0212014	0.0569847	-0.0561974	-0.0187805	-0.00241822	-0.10531	-0.103411	-0.0551805	0.00391881	-0.0550454	-0.0120948	0.0700147	-0.0813177	0.28943	0.0410778	0.11476	-0.125719	-0.102098	0.0326298	0.119643	0.0196448	0.0278874	0.0417562	0.00187839	0.0491864	0.0268948	0.0770229	-0.0897321	0.0722102	-0.0750761	0.131743	-0.0112997	0.053921	0.0993317	0.0545063	0.0079482	-0.0979548	0.0614715	0.0947632	-0.0141934	0.00955649	-0.0199058	-0.11349
	Var57	-0.107569	0.0627627	-0.0558534	-0.0716778	0.193024	-0.0174394	0.0038207	-0.0588967	0.00294293	-0.0356492	-0.102539	-0.110424	0.0165678	0.0280443	0.00127941	-0.00146516	0.0289862	-0.0153759	0.269419	0.0226566	0.0708682	-0.147432	-0.0784978	0.0829244	0.0587116	-0.0195291	0.0582106	0.0537617	-0.0276348	0.0322769	0.0333285	-0.0152291	-0.0273053	0.0277088	-0.0841113	0.192083	-0.0123238	-0.0954015	0.0429836	-0.0412177	0.0460335	-0.0605755	0.103829	0.228898	-0.00501169	-0.0275042	0.0915804	0.0279904
	Var58	-0.101189	0.0957001	-0.102739	0.0545493	0.209215	-0.0195013	-0.0772867	-0.0564631	0.0336613	-0.0739947	-0.0816009	-0.0670344	0.0909817	0.0525057	0.0599244	0.0133501	-0.0201261	0.104273	0.189169	-0.00813116	-0.0254617	-0.136702	-0.00589422	0.120838	-0.0273836	-0.103777	0.0603746	0.0638684	-0.0944168	-0.0315296	0.0228381	-0.121962	0.0652667	-0.0797726	-0.0351274	0.141263	0.0173583	-0.171751	-0.0573895	-0.0190791	-0.0274491	0.0130611	0.0474937	0.171826	0.00938066	-0.00995883	0.106427	0.0182414
	Var59	-0.0897503	0.131136	-0.149379	0.179335	0.223813	-0.0226235	-0.153929	-0.0423135	0.0601038	-0.0908307	-0.0388914	-0.00118661	0.120869	0.0572819	0.0913594	0.0202276	-0.0381164	0.19135	0.0746032	-0.0207197	-0.110069	-0.0655985	0.0663523	0.121603	-0.0895866	-0.164591	0.0226922	0.0483142	-0.123061	-0.0707838	0.0172228	-0.119892	0.0573496	-0.113261	0.0269272	0.0148505	-0.0153718	-0.0887162	-0.0393818	0.0600544	-0.0608586	0.00202787	-0.0236259	-0.0854971	0.00123915	-0.0315027	0.00128474	-0.0815809
	Var60	-0.0736391	0.164512	-0.188642	0.260171	0.228632	-0.0208415	-0.188406	-0.0207752	0.0645671	-0.0582924	0.0227672	0.0430077	0.0828946	0.031489	0.0686161	0.0213836	-0.0212214	0.156375	-0.0159776	-0.0103265	-0.102306	0.0342794	0.0761116	0.0542228	-0.0754092	-0.109082	-0.020222	0.0184305	-0.0465789	-0.0547297	-0.0046202	-0.015435	-0.0556111	-0.0231827	0.00505374	-0.0591403	-0.0404731	0.0487982	0.017603	0.0608253	0.0185789	0.00534649	-0.026239	-0.21864	0.0401714	0.0656589	-0.0522792	-0.00949905
	Var61	-0.053829	0.193157	-0.217542	0.271509	0.212031	-0.0125305	-0.155543	-0.00255347	0.0332698	0.0198498	0.0810283	0.0475138	-0.00678604	-0.00499703	0.00438141	0.0067204	0.0110523	0.00733894	-0.0401956	0.00345455	-0.0104384	0.0851308	0.0157177	-0.0690935	0.00474919	0.0285561	-0.0325771	-0.0137147	0.086504	-0.0047164	-0.0134192	0.0723823	-0.111784	0.0624465	-0.0252672	-0.0512415	0.00591759	0.112959	0.0424293	-0.0139566	0.0328776	-0.00218706	0.0160833	-0.0534144	0.0553684	0.115418	-0.0746817	0.119707
	Var62	-0.0318978	0.214291	-0.233007	0.212599	0.166031	0.00104221	-0.0599889	0.00405518	-0.0200506	0.0938301	0.108463	0.0234292	-0.0907413	-0.0315801	-0.0500079	-0.0109072	0.0420583	-0.140488	-0.0346282	0.00996083	0.0717053	0.0682785	-0.0473505	-0.14924	0.077487	0.120184	-0.0135819	-0.0357037	0.14483	0.0308676	0.0161615	0.0889532	-0.0710289	0.0845181	0.0125682	-0.0305292	0.0513091	0.114318	0.0135199	-0.0595219	-0.0344699	-0.00555605	-0.0214041	0.1226	-0.0358836	-0.0380506	-0.0853941	0.0499567
	Var63	-0.0103461	0.225964	-0.231192	0.111416	0.0980456	0.017894	0.0656773	-0.00831998	-0.0678222	0.121596	0.0976657	-0.00519672	-0.103598	-0.0444094	-0.0649975	-0.0159937	0.0469906	-0.195791	-0.0610075	0.00560803	0.0876764	0.0260789	-0.0513055	-0.113369	0.0862775	0.122004	0.00242927	-0.0242555	0.0857911	0.0377408	0.0114108	0.0563479	0.00374441	0.0467883	0.0556308	-0.0211177	0.0676196	-0.0114996	-0.0214308	-0.0212209	-0.0103927	0.0431187	-0.018195	0.0937549	-0.0658361	-0.123814	0.0278342	-0.1035
	Var64	0.00871011	0.229338	-0.210872	0.0112449	0.0282092	0.0343785	0.180535	-0.030384	-0.101618	0.110417	0.0586216	-0.023933	-0.0532097	-0.0379601	-0.0560173	-0.0228889	0.0154695	-0.151234	-0.106096	-0.0096471	0.0498147	-0.0129341	-0.0161896	-0.0113797	0.0442025	0.076128	-0.00559129	0.00117949	-0.0206084	0.0449938	-0.0455224	0.0163345	0.108965	-0.0242778	0.0253813	-0.0200621	0.0134419	-0.161431	0.0023632	0.0198808	0.0865522	0.0592473	0.00670706	-0.0301991	-0.018238	-0.064793	0.118816	-0.0708681
	Var65	0.0247304	0.227432	-0.174148	-0.0589204	-0.0274711	0.0471993	0.256483	-0.0407844	-0.121912	0.080618	0.0104982	-0.0275677	0.0125705	-0.0128718	-0.0308729	-0.0264681	-0.0313999	-0.0455309	-0.110363	-0.0333127	-0.00109644	-0.0400666	0.0173678	0.0739242	-0.00688213	0.0303579	-0.00854192	0.00969972	-0.107753	0.0596672	-0.0739038	-0.00864336	0.170271	-0.0391809	-0.0504298	-0.00875065	-0.0803535	-0.10456	-0.0146293	-0.00558385	0.080639	-0.0106868	-0.038069	-0.0636308	-0.0138119	0.0454703	0.085164	0.0339366
	Var66	0.0380513	0.222414	-0.12479	-0.0953132	-0.0632957	0.0567217	0.288299	-0.035277	-0.131734	0.043664	-0.0277415	-0.010182	0.0781448	0.0149854	0.0145382	-0.00913406	-0.0622366	0.0570748	-0.0595334	-0.050676	-0.0475797	-0.0505003	0.0318933	0.0979109	-0.0532983	0.00144859	0.00291435	0.00115703	-0.119993	0.0489626	-0.0518524	-0.02474	0.118556	0.00868543	-0.0485416	0.0187532	-0.0911332	0.0562119	-0.0421645	-0.0464087	-0.0280952	-0.100044	-0.0280447	0.00200459	-0.0615129	0.128846	0.0447327	-0.0174582
	Var67	0.0486436	0.215475	-0.0695757	-0.109488	-0.080578	0.0595317	0.277182	-0.0265035	-0.132774	0.00751765	-0.0469586	0.0169018	0.1343	0.0384528	0.0597771	0.0160597	-0.0640331	0.109598	-0.000253375	-0.0320582	-0.0859516	-0.044046	0.0345121	0.0481229	-0.0799587	-0.0346018	0.000882351	0.00379038	-0.0357254	-0.00569648	-0.0139265	-0.0237677	0.0273223	0.0234942	0.0234775	0.027668	-0.0346263	0.123651	0.025072	-0.0325668	-0.0614057	-0.0654274	0.0357708	-0.0120305	-0.0148599	-0.000428819	-0.0148897	-0.0341361
	Var68	0.0562456	0.208049	-0.0178983	-0.114315	-0.0836383	0.0483131	0.221913	-0.0199455	-0.11791	-0.0200563	-0.041709	0.0369676	0.160802	0.0554361	0.0801815	0.0276674	-0.040162	0.11492	0.0351354	0.0109225	-0.100098	-0.00952863	0.039095	-0.0406018	-0.0458419	-0.0871258	-0.0132795	0.0277838	0.0772191	-0.0770033	0.0290627	-0.00894495	-0.0521447	0.00444993	0.0349821	0.00339313	0.00908231	0.0873217	0.0918884	0.0306527	0.0213513	0.066575	0.0408185	-0.0635028	0.114059	-0.197396	-0.13509	0.0843286
	Var69	0.0611423	0.201574	0.0230603	-0.117588	-0.0770857	0.0259637	0.13047	-0.0145003	-0.0772092	-0.0274634	-0.0127097	0.0510206	0.149187	0.0565083	0.072779	0.0371573	-0.00293993	0.0927453	0.0486459	0.0339148	-0.0769465	0.0583425	0.040598	-0.126831	0.0417757	-0.114377	-0.0203392	0.0456379	0.129819	-0.108608	0.0915776	0.00677539	-0.14921	-0.0170953	-0.00762267	-0.018149	0.0586201	0.00340245	0.0358178	0.0896273	0.0264493	0.0753092	0.00624765	0.0469586	0.0557212	-0.0809149	-0.1879	0.116027
	Var70	0.0641311	0.196651	0.0500405	-0.12417	-0.0662119	0.00161234	0.0210269	-0.0143073	-0.0110157	-0.0153923	0.0226878	0.0588017	0.115645	0.0458133	0.0467558	0.0561784	0.0219044	0.0567985	0.0326454	0.0299668	-0.0110924	0.122196	0.0408634	-0.17473	0.0845192	-0.0875366	-0.0198428	0.0477086	0.11029	-0.0771167	0.151339	-0.00225977	-0.232205	-0.0362864	-0.0121677	0.0146601	0.0759301	-0.0888801	-0.0756097	0.0742296	-0.0670103	0.00912948	-0.000250691	0.150489	-0.116066	0.177803	0.0188826	0.010966
	Var71	0.0661724	0.192925	0.0632768	-0.135003	-0.0552011	-0.0208761	-0.086687	-0.0199995	0.0651693	0.000873179	0.0523905	0.0576289	0.0792136	0.0312008	0.0119576	0.0572848	0.0343693	0.0262693	-0.0122317	0.0265976	0.0656136	0.129942	0.0442562	-0.148221	0.0552437	-0.044494	-0.0157476	0.0425677	0.0341934	-0.00768428	0.139536	-0.0629725	-0.223664	-0.0181228	-0.0142332	0.0617417	0.038819	-0.155992	-0.105864	-0.043511	-0.0671343	0.0187792	0.043317	0.0202279	-0.0910114	0.185873	0.201385	-0.165538
	Var72	0.0682183	0.189321	0.0654934	-0.146888	-0.0463755	-0.0390835	-0.169857	-0.0299252	0.130042	0.0101168	0.0801544	0.0448415	0.0381938	0.000711462	-0.0131007	0.0305607	0.0421132	0.000679251	-0.0567484	0.0246217	0.104852	0.067008	0.0522806	-0.0981082	0.0506193	-0.013609	-0.0072103	0.0349633	-0.057195	0.0798129	0.0473734	-0.113878	-0.114086	0.024648	-0.0875825	0.0917565	0.0251829	-0.106193	-0.124962	-0.144722	0.0573758	-0.0395898	0.0272452	-0.129005	0.0724951	0.0333193	-0.0206021	-0.211228
	Var73	0.0710578	0.18446	0.0607198	-0.156151	-0.0407834	-0.0506447	-0.206386	-0.0441841	0.163175	0.00635275	0.0968664	0.0184602	-0.00594819	-0.0407301	-0.00101136	0.00834906	0.0292011	-0.0156882	-0.0850317	-0.000446198	0.0921772	-0.0351045	0.0561766	-0.107778	0.077409	0.0281218	-0.00160943	0.0419137	-0.0902463	0.151521	-0.0429922	-0.0620118	0.0687695	0.0321611	-0.147687	0.165927	0.0248604	0.0935587	-0.161427	-0.0416257	0.160008	-0.0735729	-0.0701876	-0.0687471	0.119066	-0.0474775	-0.197436	0.01863
	Var74	0.0750931	0.177126	0.0537034	-0.160859	-0.0354624	-0.0523629	-0.20555	-0.0573438	0.158316	-0.0112247	0.0910703	-0.0158684	-0.0321582	-0.0580725	0.0379152	0.00804426	0.016548	-0.00429038	-0.111232	-0.0269728	0.0302455	-0.115053	0.0417854	-0.103586	0.0720994	0.0403579	-0.0105383	0.0449059	-0.0928851	0.135114	-0.0287727	0.0580055	0.234547	-0.0120946	-0.0496553	0.141376	0.00402628	0.207058	-0.0384994	0.205715	0.0477403	0.101575	-0.0336932	0.0881439	-0.0203928	-0.00480006	0.0628946	0.156802
	Var75	0.080291	0.166513	0.0478982	-0.160753	-0.0266947	-0.04033	-0.199263	-0.0595418	0.131045	-0.0177089	0.0765473	-0.0469148	-0.025332	-0.050529	0.0533149	0.013328	0.00878299	-0.0179311	-0.106328	-0.04709	-0.0348626	-0.134563	0.0283285	0.0321013	0.0452206	-0.0342581	-0.0358385	0.0125645	-0.130056	0.0243985	0.0695199	0.112869	0.227252	-0.00124052	0.137324	-0.112139	-0.0346686	0.0543126	0.177733	0.146276	-0.141302	0.0526685	0.00926256	0.112481	-0.107431	0.0147342	0.126721	0.0062469
	Var76	0.0862207	0.152498	0.0442705	-0.154695	-0.0153023	-0.0242281	-0.185814	-0.0410448	0.0955924	0.0120599	0.0628008	-0.0445868	-0.015151	-0.022285	0.0295775	0.00128929	-0.0227899	-0.0622222	-0.0584072	-0.104388	-0.0568855	-0.109829	0.0120029	0.219381	-0.00321996	-0.0779406	-0.0591529	-0.0615603	-0.115542	-0.0873774	0.0660195	0.051736	0.0192522	0.0872717	0.143522	-0.17141	-0.0539557	-0.124813	0.195534	-0.162683	-0.0444559	-0.216513	-0.056912	0.0187189	-0.0723039	-0.178899	-0.0728739	-0.0522286
	Var77	0.0922038	0.135796	0.0412585	-0.142098	-0.00150482	-0.0152873	-0.146788	-0.0223359	0.0586933	0.041811	0.0373199	-0.00368915	-0.04185	0.0365375	0.0174527	-0.0335916	-0.0332745	-0.0523439	-0.032311	-0.14215	-0.0769764	-0.0595657	-0.0526893	0.295427	-0.10177	0.00799841	-0.00388992	-0.137924	0.0876629	-0.183018	-0.0883565	-0.0559468	-0.171841	0.115201	-0.0039523	0.09082	0.0379337	-0.0317375	0.0843937	-0.140242	0.0749767	-0.0697831	-0.00856392	0.0411237	-0.0373942	-0.139099	0.0304691	0.0850409
	Var78	0.0976885	0.117253	0.0373389	-0.127114	0.0160903	-0.0121313	-0.0972992	-0.0342557	0.0255204	0.0356829	0.0172295	0.0216964	-0.0829624	0.0778713	0.043471	-0.100143	0.0177725	-0.0398534	0.012853	-0.0635428	-0.0536716	-0.00249801	-0.115573	0.197734	-0.202729	0.11015	0.1552	-0.0955246	0.328274	-0.205614	-0.160282	-0.112892	-0.0952759	0.0593669	-0.0339013	0.0581485	0.135904	0.147672	0.0590519	0.0225086	-0.0446924	0.117059	0.0581133	-0.0115686	0.0218215	0.0989602	0.0323445	0.147466
	Var79	0.102367	0.0975021	0.0339873	-0.113734	0.0343186	-0.00987855	-0.0686785	-0.0362614	-0.0194331	0.0155299	0.0277485	-0.00312686	-0.108933	0.0551554	0.0111473	-0.157842	0.0821125	-0.0905689	0.118835	0.0467224	0.0440218	0.0635909	-0.0646552	0.0146597	-0.223665	0.0682758	0.269831	0.0622468	0.258146	-0.0342751	-0.113252	-0.0863493	0.072059	-0.0267096	0.088386	-0.187916	-0.0463851	-0.0413408	-0.0375442	0.041218	-0.145422	0.0487321	0.138883	-0.164737	0.0316697	-0.0290204	-0.00582914	-0.13235
	Var80	0.106062	0.0774563	0.0324129	-0.0996376	0.0502535	0.00153169	-0.0747311	-0.000507305	-0.0741804	0.00582283	0.0226897	-0.0459313	-0.100839	0.0157289	-0.0794719	-0.113924	0.0813207	-0.138672	0.19635	0.0984385	0.015956	0.141246	0.0356831	-0.0582938	-0.197459	-0.0905826	0.187228	0.14728	-0.0487483	0.150138	-0.073577	0.0502816	0.0468822	-0.16861	0.185469	-0.133624	-0.242468	-0.212283	-0.119523	0.0261997	-0.0172389	0.102708	0.0723467	-0.0208857	0.13655	-0.028581	-0.0570633	-0.0963096
	Var81	0.108695	0.0584927	0.031261	-0.085826	0.065506	0.0142062	-0.0923541	0.0285557	-0.082963	0.027105	-0.0213454	-0.0254911	-0.0397281	0.0240341	-0.0747803	0.0447131	0.0164028	-0.146189	0.223574	0.0919404	-0.145749	0.108505	0.019928	-0.0283477	-0.192705	-0.141689	-0.0227729	-0.0128817	-0.172986	0.115586	0.0306454	0.178995	-0.0205765	-0.223548	0.0754648	-0.059411	-0.0732287	0.0964309	-0.0328821	-0.0174452	0.107584	0.00263105	-0.142078	0.0757213	0.0687386	0.131472	-0.091848	0.300139
	Var82	0.110401	0.0414201	0.0293842	-0.0752105	0.0799511	0.00898594	-0.0878776	0.0391886	-0.0509991	0.0614471	-0.0558874	0.0423685	0.00974454	0.0270585	-0.0010471	0.200197	-0.0581804	-0.0582272	0.208007	0.0187887	-0.185871	-0.0313087	-0.108047	-0.0971223	-0.110444	0.0182823	-0.159024	-0.288753	-0.0793419	-0.0035886	0.0770468	0.112426	0.0104237	-0.028498	-0.124046	-0.184787	0.0136114	0.157319	-0.0165756	-0.0263988	0.0261974	-0.0524713	-0.0194509	-0.154752	-0.142736	0.0154569	0.156908	-0.0196534
	Var83	0.111415	0.0264979	0.0275053	-0.0646245	0.0878939	-0.000530951	-0.068654	0.0462513	-0.0453167	0.0553235	-0.0581379	0.0365389	0.0214141	-0.00430119	0.0278351	0.199449	-0.0949211	0.182705	0.14833	-0.0166644	-0.0964544	-0.0460402	-0.171226	-0.199926	0.083292	0.242974	-0.124855	-0.341024	-0.0278887	0.0450427	-0.0804177	-0.0358025	0.0308171	0.00287153	-0.0959239	-0.165203	-0.0870647	-0.182918	0.0257914	-0.0193357	0.0232115	0.129596	0.116818	-0.129124	0.0600793	-0.0615681	-0.00739786	-0.195149
	Var84	0.111934	0.0136353	0.0270108	-0.054075	0.091023	0.00346129	-0.0675417	0.0512674	-0.0778357	0.0306249	-0.0429159	-0.0283664	0.0289836	-0.038336	0.0353599	0.0610628	-0.0732921	0.358326	0.0771286	0.0328214	-0.0215419	0.0502701	-0.0430163	-0.10412	0.186987	0.345883	0.0395488	-0.103987	0.0172676	0.134659	-0.231152	-0.0671228	0.0423146	-0.10246	0.168207	0.0362051	-0.060057	-0.145064	0.116765	-0.0191561	-0.0235801	-0.0306288	-0.00934224	0.12404	0.0671582	0.0660702	-0.095793	0.187412
	Var85	0.112101	0.00242949	0.0274421	-0.0462503	0.0975537	0.0122011	-0.0862946	0.0504073	-0.137336	0.00601114	-0.0198112	-0.0474082	0.00982354	-0.0876277	0.0276496	-0.0601951	-0.050919	0.27535	-0.0331405	0.116109	0.0393726	0.0651366	0.131122	0.101034	0.14219	0.266576	0.11855	0.176117	0.0847512	-0.00480324	-0.194564	0.0483505	-0.00583567	-0.0663139	0.125689	0.0712365	-0.087644	0.160649	-0.00953707	0.0353567	-0.0279964	-0.217602	-0.0472851	0.00209253	-0.169361	0.0392358	0.142991	0.0166316
	Var86	0.112056	-0.00688975	0.0270007	-0.0411688	0.102739	0.0213621	-0.0920541	0.0157584	-0.18252	-0.0463393	0.0341178	-0.00704564	-0.000907724	-0.123339	-0.0535602	-0.0975704	-0.0972907	0.0903537	-0.154833	0.191902	0.127484	0.00685384	0.139714	0.160462	0.0550074	0.0352046	-0.0299602	0.167932	0.0320722	-0.12618	-0.109321	0.0835012	-0.0839998	-0.112247	-0.307809	-0.0709587	-0.142703	0.119547	-0.0422471	-0.0220231	0.08548	0.0127722	0.056381	-0.115432	0.0183923	-0.112071	-0.00308747	-0.103394
	Var87	0.111893	-0.0148935	0.0264018	-0.0359459	0.103886	0.028322	-0.0695027	-0.038633	-0.187827	-0.0752101	0.0842515	0.00695131	0.0519405	-0.112776	-0.153919	-0.0689713	-0.157987	-0.00826078	-0.154832	0.181237	0.220235	-0.0334782	-0.000276513	0.150282	0.0172379	-0.204061	-0.177071	-0.123216	0.0354898	0.0165345	-0.0510563	-0.0036994	0.0282103	-0.0811771	-0.318229	-0.134901	-0.00286897	-0.140957	0.0429573	-0.0156959	-0.0220339	0.140124	0.14124	0.146203	0.0753563	0.0429871	-0.110712	0.134672
	Var88	0.111624	-0.0225324	0.0266752	-0.0276899	0.105501	0.0243228	-0.0463506	-0.0557891	-0.179716	-0.0299016	0.0460893	-0.0646275	0.109204	-0.0732745	-0.160447	0.0252374	-0.129724	0.000221415	-0.0710356	0.0775333	0.239665	-0.052973	-0.174311	0.166948	0.0266036	-0.221667	-0.164572	-0.15117	0.126776	0.122913	0.0768956	-0.0419909	0.0781682	0.0408951	0.250178	-0.0440382	0.150754	-0.0443446	-0.0406739	0.108007	-0.0399855	0.012782	0.0824614	0.0211712	-0.0186345	0.172947	0.0366687	-0.0544369
	Var89	0.111286	-0.0296115	0.0262013	-0.018152	0.103456	0.0194524	-0.0467864	-0.0261913	-0.157306	0.0140439	-0.014851	-0.130282	0.0922652	-0.0108221	-0.090162	0.128915	-0.0466405	0.0298349	-0.0723031	-0.0185701	0.13558	-0.0161717	-0.246292	0.0735816	-0.0705576	0.0615832	-0.163221	0.198126	-0.0125457	0.048019	0.23073	-0.0569788	-0.150796	0.00922547	0.402499	0.0165245	0.0962667	0.16536	-0.0505376	0.000881307	0.127593	-0.0298713	-0.0220617	-0.168138	0.0905342	-0.0149144	0.0225129	-0.0211677
	Var90	0.110924	-0.0356778	0.0251647	-0.00990711	0.0984084	0.0330162	-0.0492029	0.0129246	-0.129433	-0.0175556	-0.00289383	-0.104425	0.0365099	0.0335552	-0.0173655	0.136608	-0.00629272	0.0218236	-0.116694	-0.065804	-0.00297504	0.105747	-0.208897	-0.0376124	-0.23289	0.269111	-0.0812395	0.353732	-0.221522	-0.0733239	0.188729	0.00781276	-0.136697	0.0407805	-0.109832	-0.00397396	0.0145953	-0.00703242	0.0253906	-0.0615287	0.0171435	0.0471187	-0.0823393	0.122599	0.0198451	-0.113325	0.0525511	0.0730393
	Var91	0.11058	-0.0402716	0.0264774	-0.00265674	0.0973145	0.0570749	-0.0329237	0.0231088	-0.121567	-0.04993	0.0356976	-0.0484018	0.0149139	0.0139422	0.0640261	0.0441536	0.000930561	-0.010337	-0.125308	-0.0653009	-0.0895719	0.184279	-0.222523	-0.0162671	-0.140414	0.0735996	0.166809	0.132874	-0.202725	-0.109939	-0.0377436	0.160057	0.13605	0.141804	-0.263991	0.0889778	0.181856	-0.214224	0.0116028	0.0543257	-0.205539	0.0355806	-0.0946189	0.0226323	-0.0760881	0.0269642	0.0266919	-0.0994234
	Var92	0.110248	-0.0439465	0.0300597	-0.000435883	0.0982389	0.0637855	-0.0202835	0.0264008	-0.138634	-0.0395232	0.0352905	-0.00969036	0.0368608	0.00501064	0.14633	-0.044525	0.0576722	-0.0583585	-0.124072	0.00365296	-0.149981	0.168308	-0.214959	0.0108666	0.191856	-0.200511	0.264434	-0.112799	-0.106217	-0.0237457	-0.113171	0.199659	0.0523115	0.0533104	0.068464	0.154559	0.223863	-0.106173	-0.0190602	0.0636114	-0.0279603	-0.144543	0.0170402	-0.10566	0.0304372	0.0743333	-0.198436	-0.00066282
	Var93	0.109859	-0.0480319	0.0320909	-0.00486349	0.099262	0.0440132	-0.0327775	0.0453434	-0.162949	-0.0381079	-0.00296621	0.0212431	0.0815456	0.055513	0.176287	-0.0732337	0.114706	-0.144453	-0.0634518	0.000840805	-0.105933	0.100926	-0.0217532	0.0416979	0.373726	-0.181189	0.149676	-0.120896	-0.0935581	0.0563382	-0.0355792	0.0659298	-0.164994	-0.0177084	0.109365	0.0376374	-0.0801487	0.0991811	0.0122574	-0.0520672	0.179668	-0.0950321	0.0349707	-0.007144	0.0326172	-0.0974185	0.0668834	-0.0217071
	Var94	0.109399	-0.0525693	0.031491	-0.00468096	0.104364	0.0154783	-0.0512019	0.067317	-0.171527	-0.0256352	-0.034485	0.0193736	0.111299	0.101528	0.151732	-0.0812605	0.0595154	-0.198787	0.0531845	-0.154719	0.0189783	0.0280408	0.217278	0.114133	0.236977	0.0119874	-0.0411856	-0.0151097	-0.103327	0.0592445	0.00454839	-0.0911781	-0.123403	0.114965	-0.0617157	-0.0709977	-0.203722	0.0595004	-0.0386879	-0.0867298	-0.102807	0.193083	-0.10935	-0.0809242	-0.0901854	-0.0205944	0.196341	-0.0278795
	Var95	0.108995	-0.0562342	0.031355	0.00349141	0.108369	0.00805735	-0.0522341	0.0868468	-0.163133	0.0262193	-0.0362261	0.00844379	0.0946467	0.104349	0.109421	-0.0983542	-0.0357137	-0.170037	0.110226	-0.217594	0.0225567	-0.0134582	0.312932	0.0336079	-0.0224955	0.135946	-0.162718	-0.0240172	-0.070394	-0.0290901	-0.00424974	-0.119498	0.0316064	0.135577	-0.0354171	-0.0499783	0.0902883	0.0186816	-0.147401	0.0863229	-0.139821	0.144489	0.0303332	0.0617084	-0.0551395	0.183678	-0.183149	0.0248029
	Var96	0.108753	-0.0583753	0.0324454	0.00895322	0.105007	0.0219491	-0.0490044	0.0789981	-0.151743	0.0628676	-0.0206228	0.0329342	0.0410948	0.0486483	0.0659327	-0.109472	-0.0724882	-0.165143	0.0550747	-0.0749491	-0.0333854	-0.0905333	0.294612	-0.141316	-0.158952	0.140659	-0.12162	-0.0572265	-0.0111487	-0.119891	0.00154072	0.00482063	0.112499	-0.0921093	0.0622916	0.123586	0.278205	0.0531719	-0.0167506	0.117651	0.170161	-0.149393	0.14659	0.123001	0.0896943	-0.0273998	-0.0602781	-0.185284
	Var97	0.108562	-0.0600707	0.0329508	0.00939766	0.100986	0.0242712	-0.0549082	0.0426304	-0.145832	0.0540554	-0.0118183	0.0461152	-0.00480853	-0.0607529	0.0109453	-0.0780321	-0.0586233	-0.130341	-0.0144143	0.00188718	-0.0452386	-0.193202	0.179336	-0.220179	-0.11354	0.00544384	-0.0300727	0.0488428	0.123521	-0.0413852	0.122792	0.0990482	0.090158	-0.113889	0.0383818	0.283031	-0.0168081	-0.10019	0.178103	-0.135559	-0.0442052	-0.182294	-0.00415794	-0.0712191	0.110953	-0.128569	0.0504018	-0.00346548
	Var98	0.108322	-0.0620455	0.0329247	0.00947677	0.101164	0.0152195	-0.0505581	0.0200495	-0.132335	0.0492661	-0.00882513	0.0294252	-0.00599189	-0.12395	-0.0314747	-0.00510864	-0.0232788	0.0507663	-0.016707	-0.129602	-0.0739794	-0.223732	-0.00906651	-0.239989	0.0191986	-0.186103	0.0855414	0.167536	0.250345	0.103566	0.181934	-0.0206705	0.0898717	0.174606	-0.0789026	0.116388	-0.231739	-0.114031	0.101432	-0.18296	-0.145997	0.0266744	0.0179095	-0.125467	-0.138783	0.0623594	-0.0815263	0.278059
	Var99	0.108079	-0.063868	0.0335645	0.00884059	0.104822	0.0168148	-0.0350635	0.0322715	-0.0986945	0.0475873	-0.0128129	0.0384738	0.01599	-0.108699	-0.0371887	0.0507513	0.0196039	0.199174	0.00380172	-0.231418	-0.104464	-0.210097	-0.0647816	-0.140357	0.0407441	-0.227924	0.225227	0.140949	0.191873	0.0679145	-0.0162549	-0.179413	0.129899	0.197945	-0.0475471	-0.226258	0.108974	0.142134	-0.155347	0.0927845	0.221897	0.09816	-0.126241	0.15739	-0.00411	-0.0941215	0.075895	-0.229116
	Factor loadings:
		F1	F2	F3	F4	F5	F6	F7	F8	F9	F10	F11	F12	F13	F14	F15	F16	F17	F18	F19	F20	F21	F22	F23	F24	F25	F26	F27	F28	F29	F30	F31	F32	F33	F34	F35	F36	F37	F38	F39	F40	F41	F42	F43	F44	F45	F46	F47	F48
	Var1	-0.986586	-0.0424725	0.0537298	-0.0388963	0.0276452	0.139452	-0.00979692	-0.00549763	0.00933859	-0.000151078	-0.000366928	0.00385728	-0.00141441	0.000264251	0.000301714	0.000648574	0.000761939	5.49188e-05	4.98613e-05	-0.000160181	0.000633593	-0.000373341	0.000646891	-8.09248e-05	5.13675e-05	0.000311766	-0.000438855	0.000236743	0.000181548	0.000185241	-0.000107269	-9.19952e-05	1.44763e-05	1.72103e-05	9.29963e-05	-0.000137937	-2.09584e-05	2.71739e-05	-4.27379e-07	-6.07002e-06	-1.03698e-05	8.34427e-06	1.57966e-05	-7.33937e-06	2.79554e-05	2.69179e-05	3.02082e-06	1.44178e-06
	Var2	0.909098	-0.412337	0.0252994	0.00591957	0.0465016	-0.00352148	0.00978015	-0.0037157	-0.00131528	0.00764956	0.0121702	0.00634439	0.0022223	0.00999748	0.00516748	-0.00115309	0.0104763	0.00317484	0.000390123	0.00533354	0.00228029	-0.00074388	-0.00118769	-0.000940343	-0.00282654	-0.000801409	-0.000998912	-6.47368e-05	-0.00159132	0.00127316	-0.000863904	-0.000711644	0.000577731	0.0022674	-0.000452817	-0.00075094	-0.000201621	0.000446601	-2.4618e-05	-8.29883e-05	0.000284754	-0.00049954	0.000526569	0.000234991	0.000115708	-6.06225e-05	0.000140177	0.000234299
	Var3	0.913501	-0.402878	0.0244852	0.00330227	0.0430464	-0.00109616	0.0124756	-0.00304175	0.00187522	0.00551087	0.0174215	0.00264564	-0.00271732	0.01233	0.00318135	0.000216243	0.00393653	0.00189525	-0.000547561	0.0022759	0.00181338	-0.0038498	-0.000545081	0.00143882	0.00183249	0.00138638	-0.000156747	0.000151215	0.000731689	-0.000311803	0.00219221	-0.00116517	0.000217961	-0.00169067	-0.000342345	8.92248e-05	-0.000181117	-0.000614284	0.000664047	7.55127e-05	-0.000185968	-3.24621e-05	-0.000517852	-0.000178803	0.000100421	0.000133772	-0.000216425	-0.000148145
	Var4	0.918219	-0.392032	0.0242256	0.00321424	0.0417005	-0.000758534	0.013656	-0.007644	0.0031867	0.00433819	0.0181767	0.00231601	-0.00878922	0.00817773	-0.000573225	0.00535903	-0.0056371	0.000499449	0.000168938	-0.00208271	-0.00213795	-0.00322112	0.000799353	0.000990814	0.00196761	-0.000129019	0.000482342	0.000424553	0.000366676	-0.00125455	0.000173667	0.00152864	-0.00034748	-0.000996035	0.000542454	0.000705048	1.46017e-05	-2.36578e-05	-0.000769159	0.000365198	1.99668e-05	0.000351071	0.000186743	-0.000167166	-0.000296257	6.84576e-05	9.86224e-05	5.88416e-05
	Var5	0.924548	-0.376979	0.0210514	0.00629676	0.0424605	-0.00344404	0.0107078	-0.0175003	0.00322377	0.00350954	0.00862709	0.0041485	-0.00617826	-0.000783195	-0.0045263	0.0112001	-0.00598723	-0.00194845	0.00146773	-0.00291743	-0.00260269	0.00286327	0.00166619	0.000330406	0.000188806	-0.00186737	-0.000403506	0.000980547	-0.000117848	-0.000183796	-0.00232825	0.000304485	-0.000543132	0.000560555	4.40345e-05	0.000243315	-0.000733646	0.000351232	-6.65799e-05	-1.14519e-05	-0.000203991	-4.20035e-05	5.99127e-05	0.000362591	0.000376408	-0.000236127	2.77259e-05	-5.65423e-05
	Var6	0.933607	-0.353931	0.0180826	0.00750609	0.0434435	-0.00515192	0.00557802	-0.0218133	0.00411784	0.00423834	-0.00313646	0.00199551	0.00564627	-0.00328162	-0.0067163	0.00941164	0.00379307	-0.0027928	0.000571791	-0.00225236	3.36059e-07	0.00581325	0.00333203	0.00113343	-0.00021153	-0.000107535	-3.25586e-05	0.000266285	0.000885367	0.000848393	-0.000915891	-0.0019753	0.000714779	0.00022869	-0.00026244	0.00045158	-0.000147569	-0.000173383	0.000890841	-0.000127056	9.26815e-05	-0.000446935	3.34897e-05	-8.2726e-05	-0.000243478	0.000231258	-0.000202912	-0.000102607
	Var7	0.942817	-0.32834	0.0169428	0.00622879	0.0461895	-0.0021342	0.00390682	-0.0168952	0.00859344	0.00642659	-0.00701144	-0.0056052	0.0137191	-0.000880773	-0.00597362	0.00151515	0.00856497	-0.000615908	-0.0020615	-0.0018073	0.000411048	0.00132422	0.00290738	0.000511057	0.000642016	0.00169862	0.00148128	-0.000743942	0.000713275	-0.000867034	0.000841901	0.000420712	0.000544995	-0.00100731	2.88034e-05	-0.000213408	0.00050086	-0.000351443	-0.000293272	0.000355559	7.50873e-05	0.000253853	0.000146354	-0.000264143	-0.000259853	-0.000243434	0.000140104	0.000236247
	Var8	0.951339	-0.302158	0.0165044	0.00370107	0.0508241	0.0012019	0.00806169	-0.0113667	0.0132426	0.0064819	-0.00276752	-0.0119599	0.0107121	-0.000391429	-0.0038897	-0.00521624	0.00320958	0.000729127	-0.00376034	0.000998423	-0.00298028	-0.00400002	-0.00072855	-0.00150735	1.16549e-06	0.000470048	0.000339853	-0.00125495	-6.58895e-05	-0.00161412	-0.000324731	0.00202663	-0.00106629	-0.000604354	-2.75974e-05	-0.000401231	-0.000702443	0.000314636	-0.000220377	-7.68076e-05	-7.91468e-05	0.000427652	-0.000126407	0.000437914	0.000421873	-4.64689e-05	-8.96495e-05	-0.000102407
	Var9	0.961909	-0.265593	0.0178862	-0.000924024	0.0551237	0.00177398	0.0153125	-0.010214	0.0122461	0.00308071	0.00447338	-0.0112469	0.00140171	-0.00443131	-0.000716726	-0.00856964	-0.00367841	-0.000569766	-0.00112595	0.00484987	-0.00548097	-0.00252586	-0.000902837	-0.00211675	-0.00153601	-0.000226736	-0.00122015	-0.00065215	-0.000469484	0.000515874	-0.00117603	-0.000786336	-0.00095118	0.000749912	6.37403e-05	0.000422596	-3.41996e-06	0.000213919	-0.000293458	-0.000452411	-8.95139e-05	-0.000191171	-0.000219608	-0.000164884	-0.000254838	0.00042968	-2.17677e-05	-0.000245383
	Var10	0.973634	-0.217329	0.0192728	-0.00549849	0.0587054	0.0010464	0.0200782	-0.0101758	0.00901011	-0.00211562	0.00817878	-0.00374475	-0.00507169	-0.0106754	0.00560097	-0.00649351	-0.00467931	0.000405968	0.00325518	0.00320176	-0.00156879	0.00291893	0.00178252	-0.00067789	-0.000257855	0.000204059	0.000239672	-3.92817e-05	-0.00127718	0.00109132	0.0014334	-0.00225142	-0.000563899	0.000242364	1.93593e-05	-0.000356563	0.00102464	-0.000231342	-0.000284649	0.000166841	-0.000131718	-6.1261e-05	8.35632e-05	-0.000262148	-0.000224588	-0.000288798	0.000175117	0.000294285
	Var11	0.984457	-0.159638	0.017373	-0.0086808	0.0636547	-0.003327	0.0192779	-0.00845492	0.0088573	-0.00328252	0.00264838	0.00624565	-0.00367274	-0.0110068	0.0114064	-0.00222534	-0.000783851	0.00273801	0.00225644	-0.00320573	0.00516007	0.00324783	0.000466374	0.000564265	-0.000253611	0.000394288	0.000940053	-0.000976615	-0.000515382	-0.00107599	0.00234204	0.00077634	-0.000133042	-0.000352975	0.000189176	-0.000540513	-0.000284307	0.00011962	0.000505125	-5.07959e-05	0.000371428	0.000183472	0.000161834	0.00037606	0.000117043	-0.000116143	-0.000114637	-4.1887e-05
	Var12	0.993121	-0.0887128	0.0170816	-0.00833673	0.0675382	-0.0082629	0.0147317	-0.00530227	0.0113148	-0.000950524	-0.0104716	0.0133486	0.00135115	-0.00247621	0.00981206	-0.000168658	-0.000132534	-0.000290085	-0.0016919	-0.00397781	0.00641249	-0.00107844	-0.00265213	-0.00030541	-0.00209908	-0.000266373	-0.00100241	-0.000357005	0.000672451	-0.000263473	-0.0012076	0.00236403	0.000534417	-0.000251463	0.000469783	0.000245479	-0.000369619	5.20191e-05	-0.000306652	-0.000334317	-5.50829e-05	9.47867e-05	-0.000477566	-0.00013352	4.82089e-05	0.000358006	3.27568e-05	-9.85376e-05
	Var13	0.996987	-0.00678042	0.0267422	-0.00298647	0.0653244	-0.00708242	0.00919405	0.00165909	0.016029	0.000283158	-0.0162074	0.0132781	0.00411244	0.0062186	0.00225331	0.000402236	-0.00516693	-0.00453535	-0.00271183	0.00225414	0.00136783	-0.00232806	-0.00236861	-0.000601362	0.000351742	-0.000401194	-0.000874763	0.00216534	0.000260091	0.0016976	-0.00163927	-0.000357742	-0.000264689	-0.000525532	-6.76019e-06	-0.000127211	0.000336754	-0.000212408	-0.000401869	0.000224524	-0.000320473	-0.000228267	0.00011954	-0.000277934	7.19795e-05	-0.000265755	9.14398e-05	0.000195555
	Var14	0.993609	0.0798895	0.0452638	0.00254207	0.0584454	-0.000318024	0.00596247	0.0142583	0.0173091	0.00518203	-0.00888695	0.00560299	0.00330709	0.00763866	-0.00386607	-0.00101675	-0.00822152	-0.00269669	-0.00145947	0.00514427	-0.00191406	0.00201991	-0.000201346	0.00125721	0.00181628	0.000856293	0.00207659	0.000907314	0.000326982	0.00072568	0.00165117	-0.000723824	0.000221257	0.000486175	-0.000358795	-0.000582582	0.00013102	0.000154012	0.000699004	0.00011776	0.000244156	-8.11493e-05	0.00029039	0.000318377	-0.000165033	-0.000137348	-8.74338e-05	-8.42866e-05
	Var15	0.982132	0.164464	0.0678522	0.00645889	0.0507618	0.00625218	0.00895079	0.0237956	0.0123141	0.011985	-0.00140321	-0.00618536	-0.000521785	0.00439913	-0.00552958	-0.00129316	-0.00370573	0.00265101	0.000702703	0.000213279	0.0024994	0.00503842	0.00180193	0.00102024	-0.000451564	-0.000950597	0.00177503	-0.00155929	2.79674e-05	-0.000794567	0.00181097	0.000559243	0.00149789	0.00119526	0.000228377	0.000412267	-0.000594051	7.75547e-05	-0.000161059	-0.000257854	0.000159441	0.00027652	-0.000519891	0.000168725	6.38605e-06	0.000181756	9.24695e-06	4.74435e-05
	Var16	0.963818	0.241182	0.0967924	0.0149715	0.0432958	0.00610227	0.0150096	0.0258806	0.0102593	0.00966768	0.00150453	-0.0130145	-0.00374681	-0.000783335	-0.0028019	0.000889633	0.00287029	0.00346543	0.00121848	-0.00526717	0.00477682	0.00146824	0.000763473	-0.000714497	-0.000645586	-0.00315645	-0.00159037	-0.000157233	-0.000502317	-0.000991873	-0.00126688	-0.0003123	-0.000254352	-0.000530901	-0.000178232	0.000589763	-0.000237439	4.54729e-05	-0.000239639	0.000205647	-5.94484e-05	-0.000364732	0.000258432	-0.000393794	3.35447e-05	-0.000234972	6.13498e-05	3.73119e-05
	Var17	0.939776	0.309507	0.132673	0.0317675	0.035429	0.00230919	0.0163072	0.0246211	0.00986301	-0.00120705	0.00325075	-0.00497419	-0.00215649	-0.00721322	0.00122323	0.00377511	0.00577506	-0.00234356	-0.000565899	-0.00252433	-0.00213168	-0.00225007	-0.00154844	0.000591982	0.00121551	-0.000669202	-0.00221356	0.00155221	0.000135408	6.02713e-05	-0.0017646	-0.000962057	-0.000950984	-0.00112073	-0.000536145	-0.00055862	0.000789861	-0.000117109	0.00060171	0.000132119	-0.000345245	-0.000177525	0.000323591	7.44173e-05	4.63707e-05	0.000143117	-6.45822e-05	1.72659e-05
	Var18	0.90954	0.371614	0.173377	0.0529991	0.0278957	0.00151535	0.0139166	0.0174889	0.00440015	-0.011754	0.00407723	0.00870854	0.00126328	-0.00937831	-0.000544226	0.00579109	0.0058175	-0.00393419	0.000143616	0.00491861	-0.00472056	-0.00296326	0.000398397	0.00280442	0.0005135	0.00188373	0.00024277	0.000755525	0.000359453	-0.00014517	0.000431198	-0.000355634	0.000449012	0.000359301	0.000613094	9.01178e-05	-0.000263389	-0.000306685	-0.000258466	-0.000109725	2.57751e-05	0.000475078	-0.000244131	0.000200084	0.000218194	0.000130441	-3.65029e-05	-8.96643e-06
	Var19	0.866655	0.439756	0.221613	0.0714057	0.0219684	0.00230042	0.0128721	0.00416662	-0.000293373	-0.0190114	0.00387324	0.0107021	0.00178717	-0.00225805	-0.00899852	0.00224324	0.00259094	0.00171198	0.00220809	0.00323116	0.00130963	-0.00271831	0.00220445	0.00129665	-0.00189232	0.00135726	0.0019756	-0.00163648	-0.00072634	-0.000233677	0.000503826	0.000997396	-5.22432e-05	0.0006738	0.000342723	0.000794771	-7.64641e-05	0.000353835	-0.000469057	9.74458e-05	9.3894e-05	-0.000144787	2.75518e-05	-0.000254989	-0.000217831	-0.000115473	5.88959e-05	-8.8644e-05
	Var20	0.788675	0.534529	0.288053	0.0896791	0.0164124	0.00160079	0.0118206	-0.00708313	0.000118188	-0.0236532	0.00171071	0.000635241	-0.00131651	0.0064814	-0.0101841	-0.00494086	-0.00142055	0.00170278	0.000630687	-0.00535501	0.0028939	-0.00050315	-0.000302693	-0.00255159	4.56655e-06	0.000462041	0.00110509	-0.0015854	-0.00107273	0.000264134	-0.000318886	0.000497312	-0.000457947	-9.3917e-05	-0.000497059	-0.000256256	0.000591731	0.000140302	0.000178377	-0.000274436	-0.000281876	-0.000334797	-7.28134e-05	0.000166552	-3.79028e-05	9.99031e-07	-2.6793e-06	8.9864e-05
	Var21	0.605337	0.678308	0.39734	0.121256	0.0068807	0.00180136	0.00837703	-0.0114045	0.000826036	-0.017369	-0.00477147	-0.0126844	-0.00604597	0.00698033	0.00281939	-0.00342307	-0.000679331	-0.00277818	-0.00100947	-0.00280086	-0.00116157	0.00179061	-0.00150324	-0.00146462	0.00211453	0.000725194	-0.00188692	0.00104043	0.00101902	-0.0002483	3.05811e-05	-0.00107579	0.00107449	0.000334268	0.000192279	-0.000476726	-0.000948841	-0.000159363	0.000458117	0.000107164	0.000519831	6.76036e-05	3.63653e-05	-0.000163519	0.00028675	5.32996e-07	7.18547e-05	-4.50797e-07
	Var22	0.0957514	0.817258	0.544516	0.159709	-0.00999666	0.00180833	0.00167916	-0.0116234	-0.00637455	0.010221	-0.0125604	-0.0107742	-0.0090128	0.00130011	0.00885655	0.00648062	0.00142201	0.00095299	-0.00112057	0.00624606	0.000157681	-9.17127e-05	0.00181519	0.00172456	-0.000456942	-0.000725665	-0.000885527	-0.000254492	0.000897653	0.000437059	0.000297355	0.00051825	0.000715324	0.00019397	-0.000225529	0.000448399	0.000337884	0.000264036	-0.000373039	7.88681e-05	-0.00017818	0.000162786	2.47566e-05	0.000134583	-0.000267444	3.40048e-05	-8.97722e-05	-7.67117e-05
	Var23	-0.615828	0.607424	0.484143	0.126977	-0.0161467	-0.00083054	-0.00236177	-0.00673568	-0.00964313	0.0253569	-0.00469149	0.011246	-0.00392203	-0.00372243	-0.00398748	-0.00251557	-0.000180759	0.00167513	-0.000116042	-0.000506577	0.000870734	-0.00266146	0.000201031	0.00013961	0.00013371	-0.000619916	0.00237035	-0.000530281	-0.00224347	3.65243e-06	0.000204349	-0.000215956	-0.00146623	-0.00056209	-0.00027774	-0.000236106	0.000480696	-0.000239536	0.000220642	-0.000277188	-0.000219878	-1.72733e-05	-0.000193464	4.89948e-05	0.000270942	-6.25248e-05	8.49612e-05	4.25964e-06
	Var24	-0.884758	0.330129	0.320746	0.0678989	-0.0121794	-0.00114206	-0.0014492	-0.00204375	-0.00127591	0.0127941	0.00595759	0.0119402	0.00589613	-0.00325464	-0.00500137	-0.00977201	-0.000434183	-0.000744835	0.00296257	-0.00420719	-0.00221663	0.000936384	-0.00425649	0.00135744	0.00110869	0.0011258	-0.00191142	0.00137853	-0.000993027	-0.000467772	-0.000194299	-0.000745834	0.000349785	-6.7386e-05	0.000405373	3.7719e-05	-0.000636778	-0.000126279	0.000259083	0.000536495	0.000421674	-9.3266e-05	4.2637e-05	-0.000146585	-0.00020979	0.000190323	6.60074e-05	7.55889e-05
	Var25	-0.953662	0.193692	0.22632	0.0364973	-0.010419	-0.000815198	-0.000861526	-6.76593e-05	0.0024915	0.00307361	0.0103885	0.00238747	0.0112308	-0.000692071	0.000793801	-0.00438264	-0.00112599	0.000441206	0.00454854	-0.00124816	-0.00156948	0.00351988	-0.00335379	0.00177251	0.000866549	0.000383853	-0.00304147	0.00116458	0.00164529	0.000623159	-0.000251503	0.00121663	0.00164983	-0.000144792	-0.000280632	0.000644998	-8.41505e-05	0.0001443	-0.000716312	-1.82141e-05	-0.000323798	2.92418e-05	3.70484e-05	0.000272408	-0.00011104	-0.000270498	-0.000274368	-0.000104811
	Var26	-0.975655	0.127854	0.175807	0.0215335	-0.00826089	-0.000490806	0.000227663	0.00158645	0.00197069	0.000452274	0.0105752	-0.00382882	0.0110058	0.000105224	0.00318696	0.00148363	-0.00245579	-0.000217739	0.00414379	0.00128258	0.000458819	0.00199463	0.000551431	0.00035853	0.00036263	-0.000186543	-0.000435003	0.000618316	0.00225355	0.000971175	-0.00045329	0.00210509	0.000856095	0.00014461	-0.000642427	8.8036e-05	0.000572717	9.6597e-05	9.97009e-05	-0.000489491	-0.000282375	-2.12533e-05	-0.000116601	-0.000245402	0.000481988	-0.000224023	0.000320061	-7.84838e-05
	Var27	-0.984628	0.0925866	0.146691	0.0124248	-0.00518036	-0.000798723	0.00158821	0.00216494	0.000975988	0.000215814	0.00780722	-0.00542139	0.00869204	-0.000921977	0.00283183	0.0033556	-0.00319457	-0.0023514	0.0018682	0.00173825	0.00201006	-0.000928295	0.00239212	-0.000794375	-0.000532967	0.000108407	0.00147647	0.000531134	0.000852953	-9.10363e-05	-0.00058743	0.00118152	-1.23286e-05	0.000529979	-0.000100955	-0.00086934	0.000469514	-0.000124928	0.00104081	-8.7996e-05	0.000269394	-0.000202529	-0.000335094	-0.000292487	0.000251181	0.000286561	0.000433377	5.26116e-05
	Var28	-0.988961	0.0718305	0.128807	0.00642556	-0.00122864	-0.00115639	0.00205136	0.0016417	0.000238259	0.000172918	0.00531245	-0.00426415	0.00648316	-0.000974606	0.00262862	0.0032246	-0.00353693	-0.00277209	4.04917e-05	0.000914063	0.00287926	-0.00242312	0.0013675	-0.00106233	-0.00112694	0.000346942	0.00183148	0.000848854	-0.000557923	-0.000982682	-0.000854924	-0.000166586	-0.000492099	0.000470072	0.000295563	-0.000978563	-0.000272131	-0.000248029	0.000467715	0.000311208	0.000455038	-0.000262726	-0.00042129	8.21714e-05	-0.00016072	0.000251555	-0.000347399	-4.26987e-05
	Var29	-0.991369	0.0581528	0.116931	0.00176031	0.00460434	-0.000696427	0.00150365	0.00125212	-0.000122116	0.000559697	0.00411336	-0.00289867	0.00469335	8.41807e-05	0.00234244	0.0030026	-0.0032315	-0.00205669	-3.0954e-05	5.70182e-05	0.00297548	-0.00211752	-0.00017003	-0.00113269	-0.000701375	0.000298301	0.00167772	0.000799683	-0.00123243	-0.00122708	-0.00160913	-0.000682835	-0.000731208	0.000221612	0.00025757	-0.000295922	-0.000531944	-0.00021745	-0.00038925	0.000284381	0.000303935	-5.34446e-05	-6.19035e-05	9.6744e-05	-0.000254734	-3.02031e-05	-0.000417613	-6.1516e-05
	Var30	-0.992818	0.0475218	0.108717	-0.00340747	0.0126172	-0.000370918	0.000941575	0.00114522	-0.000161939	0.000820487	0.00315284	-0.00224781	0.00313343	0.000406356	0.00133267	0.00267985	-0.00195011	-0.00184101	0.000170483	0.000106811	0.00235031	-0.00134172	-0.000688426	-0.00154561	0.000240193	0.000102919	0.00133703	0.000219619	-0.00107038	-0.00137224	-0.00164837	-0.000264023	-0.000386311	4.41656e-05	0.000309519	1.31134e-05	-0.000110458	-0.00021253	-0.000393702	4.99661e-05	0.000195314	0.000298032	0.000460546	-6.54806e-05	-0.000219319	1.75321e-05	0.000113158	0.000208001
	Var31	-0.993682	0.037764	0.102833	-0.00965566	0.0217086	-0.00122268	0.000728201	0.00113642	-0.000190477	0.000365913	0.00201419	-0.00126187	0.00186102	6.32787e-05	0.000277798	0.00175929	-0.000525219	-0.00160647	-0.000212187	0.000818913	0.0013334	-0.000687442	-0.000386117	-0.0017884	0.000723527	-9.28723e-05	0.000545525	6.46667e-06	-0.000510485	-0.00146221	-0.000739529	0.000352174	0.000282986	-1.73955e-05	0.000540928	-0.000178764	0.000214928	-0.000268038	-0.000111743	-0.000343385	0.000248978	0.000443932	0.000518825	-0.00010409	-0.000330917	-3.91045e-06	0.000201081	0.000356818
	Var32	-0.994107	0.0283267	0.098409	-0.0168429	0.0309798	-0.00250114	0.000453948	0.00140016	-0.00046461	-0.000490061	0.000976297	0.000286508	0.000963324	-0.000103346	-7.3384e-05	0.000648498	0.000450933	-0.000528865	-0.000870801	0.001359	0.000401613	3.54502e-05	6.62376e-05	-0.00143661	0.000431708	-0.000278356	-0.000361665	9.00201e-05	-0.000286774	-0.00132029	-6.49679e-05	0.000593134	0.000535583	6.24279e-05	0.000772033	-0.000278263	-5.23745e-06	-0.000125214	-7.31509e-05	-0.000704964	5.21949e-05	0.000252083	0.000223063	-3.36343e-05	-0.000557719	-0.000267776	-4.93865e-05	1.43936e-05
	Var33	-0.994114	0.0195363	0.0955245	-0.0244806	0.0399712	-0.00322819	0.000300755	0.00188775	-0.000937335	-0.00108413	0.000376376	0.00178839	0.000241638	-0.000368918	-0.000137763	-8.13612e-05	0.000945009	0.000558722	-0.00187454	0.00152153	-0.000264131	0.000729214	0.000386109	-0.00127755	-0.000432934	-0.000483521	-0.00108119	-9.50246e-05	-0.000193107	-0.000843272	0.000110683	0.000561651	7.26194e-05	0.00033847	0.000786225	-0.000142597	-0.000605024	9.77222e-05	3.46704e-05	-0.000241937	-0.000486919	-1.68666e-05	0.000174624	4.01106e-05	-0.000469425	-0.000317029	-0.000143271	-0.000303567
	Var34	-0.993822	0.0118892	0.0939488	-0.0318993	0.0477193	-0.00341248	0.000426442	0.00216002	-0.00163832	-0.00115793	7.84149e-05	0.00282829	-0.000527256	-0.000793677	-0.000326143	-0.000601747	0.00095913	0.00065543	-0.00287989	0.0014799	-0.000587159	0.00127714	0.000507577	-0.00155756	-0.0012876	-0.000533808	-0.00149024	-0.000514451	0.000263883	-0.000415791	0.000124837	0.000467542	-0.000745442	0.000626636	0.000404239	0.000212222	-0.00102274	7.22498e-05	0.000330941	0.000848165	-0.000685673	-0.000159535	0.000166128	6.82265e-05	-0.000135996	-0.000165394	3.32272e-06	-9.80859e-05
	Var35	-0.993459	0.00548756	0.0930042	-0.0378793	0.0535205	-0.00303363	0.000660656	0.00199428	-0.00252656	-0.00110875	-5.3762e-05	0.00294293	-0.00108906	-0.000665234	-0.000156313	-0.000824251	0.000644171	5.93927e-05	-0.00306401	0.00125249	-0.000779467	0.00157336	0.000450949	-0.00132672	-0.00154051	-0.000481487	-0.00132683	-0.00115053	0.000903724	-0.000419624	-7.20863e-05	0.000108823	-0.000897724	0.000752297	-4.92085e-05	0.000628354	-0.000864067	-0.000346753	0.000343692	0.00116655	-7.98148e-05	-0.000176978	-0.000203464	4.06324e-05	5.34619e-05	-1.91255e-05	0.000184897	0.000109153
	Var36	-0.993148	0.000355227	0.0928187	-0.0415466	0.0571707	-0.00225254	0.00115584	0.00174697	-0.00296034	-0.00148619	7.69801e-05	0.00194291	-0.00123823	-0.000102234	0.000387069	-0.000268163	0.000333996	-0.000493555	-0.0024689	0.000998896	-0.000980215	0.00138351	0.000100051	-0.000492054	-0.00139652	-0.000423267	-0.000993776	-0.00166481	0.00118374	-0.000421315	-0.000437719	-0.00058918	2.30387e-05	0.000413005	-0.000151787	0.000836186	-0.000269221	-0.000858517	4.66456e-05	0.000510651	0.000772162	-2.11719e-05	-0.00044851	0.000112598	1.98993e-05	-2.80152e-05	0.000199981	3.31664e-05
	Var37	-0.992928	-0.00306892	0.0935351	-0.0436149	0.0582233	-0.00179085	0.0021722	0.00179224	-0.00285179	-0.00221891	0.000418296	0.000808125	-0.00107603	0.00056013	0.00086197	0.000326214	0.000597356	-0.000706733	-0.00164237	0.000600528	-0.00100482	0.0010285	-0.000850548	8.59363e-05	-0.00129234	-0.000152015	-0.000884687	-0.00129132	0.00117126	-0.000122327	-0.000486708	-0.00114214	0.000545781	-0.000634159	-7.04028e-05	0.000582014	0.000154288	-0.000483263	-0.000262729	-0.000424308	0.00093897	0.000146098	-0.000421007	0.000166047	-0.000195836	-0.000202516	1.45721e-05	3.60365e-05
	Var38	-0.992911	-0.00459305	0.0943869	-0.0444384	0.0562684	-0.00199017	0.00352496	0.00190354	-0.00294217	-0.00251446	0.000978566	0.00100823	-0.000531749	0.00106408	0.00101359	0.000236936	0.00106102	-0.000855279	-0.00129793	-0.000266285	-0.000931165	0.00142834	-0.00186898	-0.000112736	-0.00106952	-0.000180966	-0.000278759	-0.000289406	0.000998964	0.000117803	-0.000101343	-0.00120335	5.90022e-05	-0.00159087	-0.0003578	-3.0622e-06	-0.000152864	0.000554864	-0.000459802	-0.000972179	0.000304538	-5.7747e-05	-0.000301578	9.9836e-05	-0.000326926	-1.69659e-05	-6.24416e-05	3.33839e-05
	Var39	-0.993199	-0.00434431	0.0943032	-0.0427553	0.0524151	-0.00236764	0.00428763	0.00199481	-0.00287255	-0.00173039	0.00176199	0.00183169	4.85191e-05	0.000577258	0.000409282	-4.4762e-05	0.000640618	-0.000858278	-0.00160132	-0.000815483	-0.000653936	0.00208101	-0.00162652	-0.000769051	-0.000807099	-0.000839063	0.000905797	0.000175933	0.000133285	0.000372669	0.000104432	-0.00094143	-6.66587e-05	-0.00183808	-0.000779795	-5.32755e-05	-0.00038571	0.00104619	0.000236452	-0.000294804	-0.00021534	-3.51341e-05	3.44494e-06	0.0001675	-0.000175211	0.000312547	0.000195496	-0.000104092
	Var40	-0.993683	-0.00277092	0.093185	-0.0385765	0.0485335	-0.00269667	0.00403702	0.00208107	-0.00135104	-0.000638064	0.00250118	0.0013862	0.000399011	0.000562615	-0.000434231	-0.000532038	-0.000121914	0.000448029	-0.00206676	-0.000676306	-0.000500004	0.00142758	6.96974e-05	-0.000891268	-0.00111716	-0.0010779	0.00119219	-5.59659e-05	-0.000978245	0.00148353	-0.000221564	-0.000411696	0.000190381	-0.00121173	-0.000242643	0.000557993	0.000385825	0.000828537	0.00127237	0.00044029	4.01867e-05	0.00076449	0.000185412	-2.8888e-06	-7.13393e-06	1.80402e-05	0.000156329	-0.000215348
	Var41	-0.994178	0.000427111	0.0915867	-0.0337832	0.0446936	-0.00324596	0.00411581	0.00212933	0.000305103	-0.000587718	0.00270362	-0.000185556	0.000496192	0.0024027	-0.00036482	-0.0010341	0.000120695	0.00246523	-0.00241739	-0.00119821	-0.000315758	0.00014773	0.0021263	0.000144573	-0.00175367	-0.000257276	0.000125458	-0.000178866	-0.00093699	0.0031274	-0.000911818	0.00023254	-0.000313314	0.000116111	0.000827384	0.000509111	0.000869247	0.000145992	0.000953139	-0.000215132	0.000122886	0.000892948	6.03541e-05	-0.000268951	-0.000159881	-0.000185387	-0.000271189	-0.000104748
	Var42	-0.994738	0.00600298	0.0885405	-0.0298481	0.0402656	-0.00350243	0.00493632	0.00235044	-1.21853e-05	-0.000720211	0.00195153	-0.0015008	-0.000204914	0.00303385	0.00018296	-0.00090442	0.000520122	0.00236284	-0.00235352	-0.00255551	-0.000214721	-0.000240419	0.00325732	0.00142148	-0.00135173	0.000602832	-0.000546407	1.1874e-05	0.000472203	0.00334737	-0.00113834	0.000753685	-0.00127814	0.000484642	0.000919715	-0.000502507	0.000456774	-0.000512782	-0.000133758	-0.000512652	-0.000369326	3.20082e-05	-0.00023318	0.000265361	-0.000137566	-4.23792e-05	-7.51016e-05	8.12901e-05
	Var43	-0.9954	0.0136931	0.0832666	-0.0278536	0.0345637	-0.0031962	0.00480896	0.00210605	-9.33382e-05	-0.000300069	0.000678976	-0.00179701	-0.00128017	0.00091938	0.000583869	-0.00022633	5.78361e-05	0.000822355	-0.00224727	-0.00349511	-0.00178051	-0.000325773	0.0021492	0.00149647	-0.000663073	0.000772213	0.000223674	-6.97235e-05	0.00146719	0.00248732	0.000338385	0.00141308	-0.00123591	-0.00028171	-4.38168e-05	-0.0011256	0.000108189	-0.000596238	-0.000783543	0.000316544	-7.08556e-05	-0.000426905	-0.00019923	0.000435878	0.00014167	-7.60882e-05	0.00022062	2.75119e-05
	Var44	-0.995858	0.0248399	0.0775646	-0.0272027	0.0284876	-0.0029838	0.00421089	0.00112571	0.00126079	0.000304141	-0.00030876	-0.00171534	-0.00182354	-0.000840995	0.000770633	0.000646868	-0.000235695	0.0005817	-0.00204853	-0.00335365	-0.00257786	-0.000575228	0.000330778	0.00136883	-0.000826647	0.00109048	0.00103962	-4.78953e-05	0.00111987	0.00191309	0.00197876	0.00199089	-0.000183586	-0.000429365	-0.00110752	-0.00082192	-0.000190544	-0.000302099	-0.000540475	0.000502245	0.00057499	-0.000526012	0.000494719	-0.000329313	-0.000169566	0.000136826	-0.000193029	3.73029e-05
	Var45	-0.995861	0.0388762	0.0733723	-0.0257692	0.0253192	-0.00290118	0.00413635	0.000565149	0.00148504	0.00117944	-0.000391256	-0.00185522	-0.000715566	-0.00104686	0.000837004	0.00114319	-0.000492221	0.00020657	-0.0015811	-0.00243352	-0.00125018	-0.000674897	-8.36484e-05	0.00168539	-0.000502831	0.0016178	0.00101422	0.000141129	0.000166918	0.00101232	0.0015041	0.00136701	3.19e-05	0.000542568	-0.000776916	3.9499e-05	-0.00038254	5.12455e-05	9.17985e-05	-0.000260917	0.000394387	-0.00012171	0.000968337	-0.000315335	-4.98722e-05	0.000231055	-0.00017601	5.21171e-06
	Var46	-0.995562	0.0506411	0.0710781	-0.0231131	0.025551	-0.00213188	0.00382669	0.000777577	8.90164e-05	0.00143458	0.000627676	-0.00204091	0.00155505	-0.00125182	0.000929398	0.00126795	-0.00123047	-0.00118271	-0.00197272	-0.00162291	-0.000426298	-0.000570904	-0.000354724	0.00120675	-0.000101876	0.00160216	0.000903981	-0.00064049	-0.000654989	0.000452041	0.000767556	-0.000454164	-0.000435208	0.00100237	0.000293048	0.000932265	-0.000488504	0.000215943	-0.00018966	-0.000406379	-0.000168556	0.000444344	0.000618595	-6.60626e-06	0.000625351	0.000158381	8.40982e-05	-2.82875e-05
	Var47	-0.995293	0.0568172	0.070046	-0.020971	0.027482	-0.000764852	0.00278194	0.00066406	-0.00170846	0.000991878	0.00186226	-0.00240356	0.00259546	-0.00157074	0.00101542	0.00171932	-0.00155281	-0.00199728	-0.00241903	-0.000882851	0.000276766	-0.000137481	-0.000925259	0.000474741	-0.000158454	0.00113772	0.00123852	-0.00179272	-0.0006468	0.000502486	0.000951365	-0.00177841	-0.000284392	0.000331676	0.000195567	0.000827213	-0.000488416	0.000175225	-0.000623235	0.000240599	-0.000481272	0.000105144	-4.61504e-05	-0.000207777	0.00052691	-1.56106e-05	-7.16897e-05	8.85161e-05
	Var48	-0.995199	0.058175	0.0687215	-0.0211147	0.0310493	-0.000206867	0.00153709	0.000335859	-0.00283574	0.000293962	0.00242385	-0.00256263	0.00234644	-0.00142938	0.00104325	0.0023043	-0.00120375	-0.00219173	-0.00174663	-0.00023087	0.00121234	-6.46521e-05	-0.00111236	-0.00012111	-7.56996e-07	0.000781022	0.00150016	-0.00202301	-0.000186772	0.000159177	0.000879838	-0.00182146	0.000475117	-0.000275288	-0.000330508	-0.000211522	-0.000164722	0.000316982	-0.000363491	0.000357923	-0.000488862	-0.000444818	-0.000396878	-0.000183031	0.000131799	-0.00027895	-6.06905e-05	6.94135e-05
	Var49	-0.995233	0.0561162	0.0664448	-0.0244363	0.0361959	-0.00125785	0.00100713	0.00037801	-0.00264707	-0.000219736	0.0020674	-0.00152577	0.0014459	-0.000829184	0.00061928	0.00206141	-0.00064736	-0.00194997	-0.00121412	-4.0555e-05	0.000976893	-0.000237055	-0.00066238	-0.000702312	0.000510882	0.000505069	0.00126047	-0.00124329	9.70872e-05	-0.000468246	0.000623534	-0.00133211	0.00120722	-0.000549105	-0.00014217	-0.000805751	0.000137762	0.000479606	-0.000164255	-4.90317e-05	-0.000560757	-0.000467944	-0.000194796	5.10899e-05	7.15573e-05	-0.000164695	-2.0898e-06	8.93175e-05
	Var50	-0.99524	0.0511131	0.0638102	-0.0324221	0.041609	-0.0034462	0.00125674	0.000285162	-0.00143839	-0.000379976	0.000855688	0.000856067	-0.000213015	1.93027e-05	-0.000394488	0.00100084	-4.58799e-05	-0.000700187	-0.00155982	1.89848e-05	-0.000341053	0.00028883	0.00033025	-0.0010269	0.000974167	6.34693e-05	0.000570376	-0.000133321	-1.95044e-05	-0.00117651	0.000508629	-0.000863495	0.00129707	-0.000501394	0.000485689	-0.000636443	0.000146741	0.000410907	-0.00026122	-0.000348463	-0.000505169	-0.000295439	0.000228052	0.000160978	0.000183959	0.000147286	-8.28302e-05	0.000142864
	Var51	-0.99492	0.0441189	0.0609699	-0.0471186	0.0465866	-0.0058452	0.00195331	-0.000395246	-2.89415e-05	-0.000500463	-0.000787035	0.00326119	-0.00221609	0.000638293	-0.00167326	-0.000109179	0.000394137	0.00131566	-0.00214622	0.000328482	-0.00149129	0.00118381	0.00142617	-0.00099034	0.00110348	-0.000319861	-0.000431884	0.000704143	-0.000367505	-0.00182521	0.000243349	-0.000286026	0.00100304	-8.43481e-05	0.00078287	-0.000424569	0.000212824	0.000100341	-0.000276133	-0.000376683	-9.03108e-05	-0.000291214	0.000459862	0.000210631	0.000306666	0.000277852	1.57306e-05	-2.39038e-05
	Var52	-0.99385	0.0376936	0.0571547	-0.0687634	0.0519423	-0.00748223	0.0032518	-0.00143155	0.000570696	-0.000391529	-0.00208585	0.00420728	-0.00384921	0.000629781	-0.00261785	-0.000979811	0.000630801	0.00267873	-0.00207002	0.000667513	-0.00191169	0.00148572	0.00210117	-0.00045313	0.0012053	-0.000384244	-0.0012902	0.00116273	-0.000502301	-0.00191506	-7.15384e-05	0.000240792	0.000820793	0.000421335	0.000488991	-0.000499046	0.000523106	-0.000261596	-0.000156724	-0.000261372	0.000186713	-0.00016457	0.000214736	1.67833e-05	0.00036929	0.000208101	0.000143837	-0.00011187
	Var53	-0.99185	0.0368084	0.0504157	-0.0932516	0.058942	-0.00761742	0.0053175	-0.00260972	-0.000175365	0.000199584	-0.0028591	0.0030027	-0.00474817	0.000242269	-0.00298537	-0.0013383	0.0010631	0.00218313	-0.000461452	0.000798108	-0.00135728	0.000898942	0.00181409	0.0002452	0.00160421	-9.82881e-05	-0.00142762	0.00122813	-0.000387929	-0.00145956	-0.000168142	0.000448664	0.000571407	0.000743671	-2.63767e-05	-0.000626158	0.000689216	-0.000268817	-6.08201e-05	-0.000137132	5.23682e-05	0.000182376	-0.000368722	-0.000391007	0.000292407	1.10741e-05	-2.14638e-05	0.000106697
	Var54	-0.98941	0.0494549	0.037307	-0.111942	0.0672329	-0.00631817	0.00750276	-0.00352271	-0.00137854	0.000787912	-0.00370894	0.000183308	-0.00481238	-0.000137011	-0.00311672	-0.000921095	0.00170082	0.000217776	0.00259577	0.000849296	0.0001992	-0.000357606	0.000412996	0.000424953	0.00208786	0.000267526	-0.000889177	0.000895198	-0.000222022	-0.000823476	-0.00014008	0.000612303	5.20531e-05	0.00070409	-0.000362173	-0.000443212	0.000533749	0.000143892	-4.0536e-05	0.000123672	-0.000145437	0.000292449	-0.000611141	-0.000488667	6.80474e-05	-4.01009e-05	-0.000196667	0.000145117
	Var55	-0.986702	0.0854424	0.0136408	-0.114479	0.0748799	-0.00448451	0.00851409	-0.00380049	-0.00183042	0.000778789	-0.00469611	-0.002771	-0.0040226	-0.000265204	-0.00292418	-0.000458578	0.00208967	-0.00164095	0.00551736	0.000948369	0.00183827	-0.00169937	-0.00125248	0.000226653	0.00223649	0.000390182	-0.000189996	0.000548299	-5.14651e-05	-5.5867e-05	-1.4421e-06	0.000858796	-0.000527664	0.000524128	-0.000439934	0.000110689	0.000226359	0.000480979	0.000139765	0.000367229	-0.000160133	1.79541e-05	-0.000280215	-0.000193273	-5.42437e-05	8.27684e-05	-0.000160053	-0.000130883
	Var56	-0.979995	0.153986	-0.024772	-0.091951	0.0813669	-0.00306761	0.00662934	-0.00389341	-0.00127344	-0.000135795	-0.00528214	-0.00486496	-0.00222803	0.000134167	-0.00184136	-0.000373657	0.0018373	-0.00201893	0.00682606	0.000957684	0.00241688	-0.00259121	-0.00203704	0.000512811	0.00187125	0.000286688	0.000370552	0.00049133	2.07217e-05	0.00051086	0.000262634	0.000734282	-0.000712231	0.000482512	-0.000496929	0.000756051	-5.50071e-05	0.000227148	0.000400049	0.000180018	2.4613e-05	-0.00027872	0.00016515	0.000224515	-3.06914e-05	1.69525e-05	-3.17604e-05	-0.00017139
	Var57	-0.95734	0.259898	-0.0800282	-0.0407822	0.0879884	-0.00252328	0.000444483	-0.00408043	0.00019955	-0.00200188	-0.00514316	-0.00519491	0.000668962	0.000960145	4.27982e-05	-4.52647e-05	0.000760646	-0.000381747	0.00635413	0.000528213	0.0014925	-0.00303873	-0.00156617	0.00130324	0.000918269	-0.000285	0.000773468	0.000632594	-0.000304858	0.000335234	0.000325461	-0.000145184	-0.00021673	0.000185152	-0.000556734	0.00110233	-5.99921e-05	-0.000401889	0.000173112	-0.000136129	0.000142551	-0.000172361	0.000278948	0.000542312	-1.08372e-05	-4.87905e-05	0.00014612	4.22706e-05
	Var58	-0.900558	0.39629	-0.147207	0.0310366	0.0953691	-0.00282163	-0.00899118	-0.00391183	0.00228245	-0.00415516	-0.00409296	-0.00315363	0.00367359	0.00179762	0.00200456	0.000412436	-0.000528142	0.00258886	0.00446146	-0.000189569	-0.00053623	-0.00281757	-0.000117601	0.00189909	-0.000428289	-0.00151448	0.000802221	0.000751517	-0.00104157	-0.000327472	0.00022302	-0.0011627	0.000518042	-0.000533044	-0.000232509	0.000810686	8.45003e-05	-0.00072352	-0.000231131	-6.30123e-05	-8.50008e-05	3.71639e-05	0.000127597	0.000407095	2.02845e-05	-1.76662e-05	0.000169809	2.75478e-05
	Var59	-0.798757	0.543029	-0.214034	0.102035	0.102024	-0.00327337	-0.0179074	-0.00293153	0.00407543	-0.00510059	-0.00195072	-5.58242e-05	0.00488034	0.00196115	0.00305611	0.000624912	-0.00100024	0.00475078	0.00175948	-0.000483057	-0.00231808	-0.00135206	0.00132385	0.00191112	-0.00140116	-0.00240197	0.00030152	0.000568495	-0.00135757	-0.000735174	0.000168185	-0.00114297	0.000455201	-0.000756813	0.000178232	8.52244e-05	-7.48298e-05	-0.000373727	-0.000158606	0.000198341	-0.000188459	5.77009e-06	-6.34737e-05	-0.000202562	2.67952e-06	-5.58834e-05	2.04985e-06	-0.000123202
	Var60	-0.655371	0.681236	-0.270291	0.148028	0.10422	-0.00301552	-0.0219183	-0.00143933	0.00437806	-0.0032734	0.00114196	0.0020233	0.00334705	0.00107808	0.00229531	0.000660624	-0.000556885	0.00388243	-0.000376825	-0.000240751	-0.00215459	0.000706535	0.00151857	0.000852168	-0.00117942	-0.0015919	-0.000268698	0.000216865	-0.000513843	-0.000568433	-4.51174e-05	-0.000147147	-0.000441402	-0.000154908	3.34508e-05	-0.000339396	-0.000197023	0.000205568	7.08944e-05	0.000200887	5.75327e-05	1.52129e-05	-7.04941e-05	-0.000518008	8.68659e-05	0.000116474	-8.34133e-05	-1.43453e-05
	Var61	-0.479066	0.799854	-0.311699	0.154479	0.0966529	-0.00181302	-0.0180951	-0.000176907	0.00225591	0.00111467	0.00406424	0.00223529	-0.000274001	-0.000171082	0.000146565	0.00020762	0.00029003	0.000182209	-0.000947993	8.05391e-05	-0.000219836	0.00175464	0.000313596	-0.00108588	7.42789e-05	0.000416736	-0.000432865	-0.000161376	0.000954283	-4.89854e-05	-0.000131041	0.000690042	-0.000887262	0.000417271	-0.000167244	-0.000294066	2.88068e-05	0.000475851	0.00017088	-4.60943e-05	0.000101811	-6.22304e-06	4.32096e-05	-0.000126551	0.000119728	0.000204743	-0.000119157	0.000180779
	Var62	-0.283883	0.887372	-0.333859	0.120961	0.0756838	0.000150796	-0.00697883	0.000280947	-0.00135956	0.00526903	0.00544029	0.00110223	-0.00366388	-0.0010812	-0.00167284	-0.000336966	0.00110368	-0.00348798	-0.000816689	0.000232226	0.00151013	0.00140729	-0.000944729	-0.00234546	0.00121192	0.00175391	-0.000180468	-0.000420112	0.00159771	0.000320597	0.000157821	0.000848018	-0.000563778	0.000564754	8.31893e-05	-0.000175202	0.000249773	0.000481578	5.44498e-05	-0.000196582	-0.000106742	-1.58091e-05	-5.75046e-05	0.000290467	-7.75939e-05	-6.74991e-05	-0.000136249	7.54436e-05
	Var63	-0.0920775	0.935708	-0.331258	0.0633917	0.0446933	0.00258906	0.00764059	-0.000576417	-0.00459879	0.00682823	0.00489874	-0.00024448	-0.00418298	-0.00152043	-0.00217427	-0.000494109	0.00123311	-0.00486104	-0.00143883	0.000130745	0.00184649	0.000537515	-0.00102364	-0.00178171	0.00134941	0.00178047	3.22787e-05	-0.000285406	0.000946419	0.000391984	0.000111429	0.000537181	2.97205e-05	0.000312641	0.000368221	-0.000121191	0.000329172	-4.84432e-05	-8.63104e-05	-7.0086e-05	-3.21826e-05	0.00012269	-4.88829e-05	0.000222127	-0.000142362	-0.000219637	4.44104e-05	-0.000156304
	Var64	0.077518	0.94968	-0.302142	0.00639796	0.012859	0.00497419	0.0210026	-0.00210504	-0.00689036	0.00620048	0.00294036	-0.00112593	-0.00214846	-0.00129963	-0.00187386	-0.00070713	0.000405945	-0.00375479	-0.00250223	-0.000224912	0.00104911	-0.000266585	-0.000323012	-0.000178844	0.000691341	0.00111098	-7.42937e-05	1.38786e-05	-0.000227345	0.000467315	-0.000444537	0.000155722	0.000864886	-0.000162225	0.000167999	-0.000115133	6.54353e-05	-0.000680048	9.51754e-06	6.56601e-05	0.000268024	0.000168582	1.80193e-05	-7.15484e-05	-3.94374e-05	-0.000114938	0.000189575	-0.000107024
	Var65	0.220095	0.941786	-0.249523	-0.0335236	-0.0125225	0.00682922	0.029838	-0.00282559	-0.0082664	0.0045271	0.00052657	-0.00129692	0.000507562	-0.000440689	-0.00103274	-0.000817705	-0.000823987	-0.00113043	-0.00260285	-0.000776649	-2.30913e-05	-0.000825816	0.000346519	0.00116179	-0.000107639	0.00044303	-0.0001135	0.000114133	-0.00118869	0.000619715	-0.000721687	-8.23997e-05	0.00135149	-0.000261808	-0.000333796	-5.02185e-05	-0.000391161	-0.000440471	-5.89179e-05	-1.84417e-05	0.000249713	-3.0408e-05	-0.000102277	-0.000150756	-2.98666e-05	8.0661e-05	0.000135882	5.12504e-05
	Var66	0.338648	0.92101	-0.178802	-0.0542298	-0.0288529	0.008207	0.0335393	-0.00244403	-0.00893244	0.00245195	-0.00139146	-0.000479012	0.00315527	0.000513051	0.000486326	-0.000282187	-0.00163319	0.00141703	-0.00140407	-0.00118146	-0.00100204	-0.00104087	0.00063633	0.00153877	-0.000833603	2.11402e-05	3.87241e-05	1.36144e-05	-0.00132373	0.000508535	-0.00050635	-0.000235854	0.000941019	5.80364e-05	-0.000321298	0.000107621	-0.000443636	0.000236799	-0.000169813	-0.000153273	-8.70017e-05	-0.000284664	-7.53452e-05	4.74932e-06	-0.000133014	0.000228563	7.13726e-05	-2.63651e-05
	Var67	0.432917	0.892276	-0.0996899	-0.0622945	-0.0367309	0.00861357	0.0322461	-0.00183619	-0.00900294	0.000422153	-0.00235536	0.000795146	0.00542264	0.0013165	0.00199964	0.000496148	-0.00168034	0.00272105	-5.97572e-06	-0.000747403	-0.00181016	-0.000907836	0.00068858	0.0007563	-0.00125058	-0.000504965	1.17242e-05	4.46e-05	-0.00039411	-5.91647e-05	-0.000135996	-0.000226584	0.000216865	0.000156989	0.000155398	0.000158782	-0.000168561	0.000520893	0.000100975	-0.000107558	-0.000190153	-0.000186167	9.61024e-05	-2.85029e-05	-3.21328e-05	-7.60694e-07	-2.3757e-05	-5.15517e-05
	Var68	0.500573	0.861523	-0.0256451	-0.0650415	-0.0381259	0.00699036	0.0258163	-0.00138185	-0.00799506	-0.00112626	-0.00209205	0.00173914	0.00649272	0.00189795	0.00268219	0.000854755	-0.00105392	0.00285319	0.000828652	0.000254646	-0.0021081	-0.000196395	0.000780016	-0.000638098	-0.000716982	-0.00127148	-0.00017645	0.000326922	0.000851855	-0.000799771	0.000283804	-8.52748e-05	-0.000413888	2.97346e-05	0.000231547	1.94726e-05	4.42126e-05	0.000367852	0.000370071	0.000101236	6.61179e-05	0.000189432	0.000109664	-0.000150453	0.000246639	-0.000350166	-0.00021554	0.000127352
	Var69	0.544152	0.83471	0.0330414	-0.0669036	-0.035139	0.00375665	0.0151782	-0.0010046	-0.00523528	-0.0015422	-0.000637496	0.00240026	0.00602376	0.00193466	0.00243457	0.00114794	-7.71486e-05	0.00230265	0.00114729	0.000790687	-0.00162051	0.0012025	0.000810005	-0.00199328	0.000653385	-0.00166917	-0.000270255	0.000537004	0.00143211	-0.00112803	0.000894277	6.45919e-05	-0.00118433	-0.000114232	-5.04545e-05	-0.000104154	0.000285363	1.43332e-05	0.000144253	0.000296011	8.19048e-05	0.000214284	1.6785e-05	0.000111255	0.00012049	-0.000143537	-0.000299801	0.000175221
	Var70	0.570752	0.814323	0.0716993	-0.0706482	-0.0301822	0.000233287	0.00244617	-0.000991226	-0.000746933	-0.000864353	0.00113798	0.00276633	0.00466942	0.0015685	0.00156405	0.00173557	0.000574809	0.00141017	0.000769926	0.000698644	-0.000233608	0.00251858	0.000815299	-0.00274606	0.00132191	-0.00127747	-0.00026366	0.00056137	0.00121669	-0.000800949	0.00147786	-2.1543e-05	-0.00184308	-0.000242467	-8.05384e-05	8.4132e-05	0.000369628	-0.000374417	-0.00030451	0.000245158	-0.000207509	2.59769e-05	-6.73511e-07	0.000356542	-0.000250979	0.000315409	3.01279e-05	1.65606e-05
	Var71	0.588919	0.798896	0.0906646	-0.0768122	-0.025163	-0.00302054	-0.0100848	-0.00138559	0.0044189	4.90333e-05	0.00262782	0.00271115	0.00319843	0.00106821	0.000400001	0.00176975	0.000901908	0.000652205	-0.000288478	0.000620095	0.00138184	0.00267824	0.000882992	-0.00232944	0.00086403	-0.000649327	-0.000209245	0.000500878	0.00037721	-7.98104e-05	0.0013626	-0.000600335	-0.00177529	-0.000121098	-9.42097e-05	0.000354325	0.000188971	-0.000657132	-0.000426358	-0.000143703	-0.000207893	5.34342e-05	0.000116376	4.79245e-05	-0.000196801	0.000329726	0.000321316	-0.000249992
	Var72	0.607127	0.783971	0.0938407	-0.0835738	-0.0211399	-0.00565494	-0.0197604	-0.00207325	0.00881769	0.000568106	0.00402041	0.00210957	0.00154216	2.43581e-05	-0.000438238	0.000944142	0.00110512	1.68642e-05	-0.00133838	0.000574029	0.00220821	0.00138111	0.00104309	-0.00154187	0.000791702	-0.000198605	-9.58062e-05	0.0004114	-0.000630956	0.000828952	0.000462612	-0.00108563	-0.000905535	0.000164699	-0.00057971	0.000526575	0.00012259	-0.000447351	-0.000503274	-0.000477972	0.000177674	-0.000112648	7.31973e-05	-0.000305642	0.000156762	5.91061e-05	-3.28713e-05	-0.000318993
	Var73	0.632398	0.763841	0.0870009	-0.0888442	-0.0185908	-0.00732772	-0.02401	-0.00306112	0.0110643	0.000356738	0.00485865	0.000868459	-0.000240171	-0.00139446	-3.38316e-05	0.000257936	0.000766287	-0.000389502	-0.00200543	-1.04026e-05	0.00194128	-0.000723541	0.00112083	-0.00169384	0.0012107	0.000410398	-2.13852e-05	0.000493183	-0.000995566	0.00157372	-0.000419829	-0.000591177	0.000545844	0.000214902	-0.000977545	0.000952225	0.00012102	0.000394126	-0.000650131	-0.000137477	0.000495491	-0.000209344	-0.000188567	-0.000162877	0.000257466	-8.42217e-05	-0.000315016	2.81346e-05
	Var74	0.668311	0.733474	0.0769476	-0.0915231	-0.0161653	-0.00757632	-0.0239127	-0.00397284	0.0107349	-0.000630324	0.00456793	-0.00074653	-0.00129846	-0.00198821	0.00126832	0.000248519	0.000434247	-0.00010652	-0.00262336	-0.000628842	0.000636978	-0.00237137	0.000833695	-0.00162797	0.00112766	0.000588967	-0.000140027	0.000528391	-0.00102468	0.00140332	-0.000280972	0.000552984	0.00186167	-8.08167e-05	-0.000328669	0.000811334	1.95999e-05	0.000872252	-0.000155053	0.000679413	0.000147836	0.000289022	-9.05205e-05	0.000208833	-4.4097e-05	-8.51495e-06	0.00010035	0.000236799
	Var75	0.714571	0.689523	0.0686298	-0.0914627	-0.0121686	-0.00583531	-0.0231813	-0.00412512	0.00888569	-0.000994441	0.00383948	-0.00220711	-0.00102284	-0.00172995	0.00178347	0.000411753	0.00023048	-0.000445187	-0.0025077	-0.00109785	-0.000734216	-0.00277349	0.000565205	0.000504506	0.000707264	-0.000499949	-0.000476201	0.000147842	-0.00143473	0.000253407	0.000678878	0.00107602	0.00180377	-8.28921e-06	0.000908952	-0.000643546	-0.000168767	0.000228798	0.000715801	0.000483106	-0.000437566	0.000149863	2.48849e-05	0.000266492	-0.000232307	2.61374e-05	0.000202188	9.43396e-06
	Var76	0.767345	0.631489	0.0634319	-0.0880158	-0.00697543	-0.00350554	-0.0216168	-0.00284363	0.00648178	0.000677221	0.00314998	-0.00209759	-0.000611756	-0.000762966	0.000989413	3.98314e-05	-0.000598045	-0.00154483	-0.0013775	-0.00243368	-0.00119802	-0.00226369	0.00023948	0.00344779	-5.03613e-05	-0.00113743	-0.000785988	-0.000724357	-0.00127462	-0.000907518	0.000644696	0.000493214	0.000152811	0.000583153	0.000949972	-0.000983692	-0.000262656	-0.000525789	0.000787493	-0.000537292	-0.000137665	-0.000616065	-0.000152901	4.43493e-05	-0.000156348	-0.000317354	-0.000116273	-7.88746e-05
	Var77	0.820592	0.562328	0.0591163	-0.080849	-0.000685959	-0.0022119	-0.0170766	-0.00154746	0.00397979	0.00234789	0.0018719	-0.000173556	-0.00168979	0.00125092	0.000583819	-0.00103778	-0.000873179	-0.00129958	-0.00076204	-0.00331408	-0.00162114	-0.00122771	-0.00105125	0.00464295	-0.00159171	0.000116726	-5.16869e-05	-0.0016229	0.000967067	-0.00190086	-0.000862822	-0.000533358	-0.00136395	0.000769776	-2.61603e-05	0.000521201	0.000184661	-0.000133698	0.000339887	-0.000463176	0.000232178	-0.00019856	-2.3008e-05	9.74314e-05	-8.08604e-05	-0.000246752	4.86145e-05	0.000128427
	Var78	0.869405	0.485542	0.0535001	-0.0723236	0.00733465	-0.00175526	-0.0113193	-0.00237327	0.00173045	0.00200377	0.000864201	0.00102071	-0.00334979	0.00266606	0.00145417	-0.0030938	0.00046638	-0.000989467	0.000303133	-0.00148143	-0.00113034	-5.14868e-05	-0.0023059	0.00310759	-0.00317074	0.00160748	0.0020622	-0.001124	0.00362141	-0.00213555	-0.00156519	-0.00107623	-0.000756234	0.000396692	-0.000224393	0.000333705	0.00066158	0.000622085	0.000237826	7.43389e-05	-0.000138398	0.000333079	0.000156128	-2.74087e-05	4.71864e-05	0.000175548	5.16068e-05	0.0002227
	Var79	0.91104	0.403752	0.0486978	-0.0647106	0.0156439	-0.00142932	-0.00798974	-0.00251223	-0.00131769	0.000872083	0.00139182	-0.000147103	-0.0043984	0.00188834	0.000372895	-0.00487637	0.00215477	-0.00224861	0.00280266	0.00108928	0.00092711	0.00131068	-0.00128999	0.000230392	-0.00349819	0.00099639	0.00358536	0.000732436	0.00284778	-0.000355987	-0.00110593	-0.000823194	0.000571955	-0.000178475	0.000585028	-0.00107842	-0.000225802	-0.000174153	-0.000151206	0.00013613	-0.000450323	0.000138662	0.000373124	-0.000390299	6.8482e-05	-5.148e-05	-9.3006e-06	-0.000199873
	Var80	0.943929	0.320744	0.0464421	-0.0566903	0.0229077	0.000221618	-0.00869387	-3.51466e-05	-0.00502991	0.00032698	0.00113807	-0.00216084	-0.00407159	0.000538506	-0.00265846	-0.00351956	0.00213399	-0.00344291	0.00463082	0.00229499	0.000336038	0.00291124	0.000711943	-0.000916146	-0.00308832	-0.00132193	0.00248777	0.00173299	-0.000537774	0.00155936	-0.000718496	0.000479349	0.000372118	-0.00112666	0.00122762	-0.000766848	-0.00118033	-0.000894264	-0.000481366	8.65295e-05	-5.33832e-05	0.000292245	0.000194368	-4.9483e-05	0.000295273	-5.07006e-05	-9.10464e-05	-0.000145445
	Var81	0.967363	0.242216	0.0447916	-0.048832	0.0298604	0.00205548	-0.0107441	0.00197837	-0.00562543	0.00152208	-0.00107065	-0.00119923	-0.00160411	0.000822851	-0.00250152	0.00138136	0.000430437	-0.00362953	0.00527288	0.00214349	-0.0030695	0.00223642	0.000397599	-0.000445514	-0.00301397	-0.00206775	-0.000302592	-0.000151574	-0.00190832	0.0012005	0.000299259	0.00170641	-0.000163322	-0.00149376	0.000499503	-0.000340949	-0.000356477	0.000406225	-0.000132429	-5.7616e-05	0.000333151	7.48637e-06	-0.000381708	0.000179401	0.000148639	0.000233221	-0.000146547	0.000453264
	Var82	0.98254	0.171519	0.0421025	-0.0427921	0.0364451	0.00130016	-0.0102233	0.00271503	-0.00345807	0.00345056	-0.00280322	0.00199323	0.000393457	0.000926396	-3.50273e-05	0.00618487	-0.00152675	-0.00144564	0.00490574	0.000438039	-0.0039145	-0.000645307	-0.00215574	-0.00152638	-0.00172738	0.000266805	-0.00211301	-0.00339766	-0.000875273	-3.72719e-05	0.00075238	0.0010718	8.27362e-05	-0.000190425	-0.000821062	-0.00106046	6.62605e-05	0.000662722	-6.67564e-05	-8.71872e-05	8.11246e-05	-0.000149301	-5.22571e-05	-0.000366643	-0.00030865	2.74194e-05	0.000250352	-2.96802e-05
	Var83	0.991566	0.109727	0.0394102	-0.036769	0.0400658	-7.68227e-05	-0.00798689	0.00320434	-0.00307277	0.00310669	-0.0029161	0.00171897	0.000864642	-0.000147259	0.000931128	0.00616177	-0.00249089	0.00453615	0.0034983	-0.000388511	-0.00203136	-0.000948939	-0.00341627	-0.00314205	0.00130271	0.00354587	-0.001659	-0.0040127	-0.000307659	0.000467822	-0.000785297	-0.000341316	0.000244605	1.91877e-05	-0.000634921	-0.000948073	-0.000423831	-0.000770561	0.000103872	-6.38599e-05	7.18784e-05	0.00036875	0.000313846	-0.000305925	0.000129914	-0.000109217	-1.18035e-05	-0.00029471
	Var84	0.996187	0.0564634	0.0387017	-0.0307667	0.0414922	0.00050081	-0.00785749	0.00355186	-0.00527777	0.00171974	-0.00215259	-0.0013345	0.00117028	-0.0013125	0.00118284	0.00188647	-0.00192331	0.0088964	0.00181904	0.000765195	-0.000453678	0.00103612	-0.000858254	-0.00163635	0.00292453	0.00504767	0.000525501	-0.00122358	0.00019049	0.00139859	-0.00225726	-0.000639901	0.000335864	-0.000684644	0.00111336	0.000207775	-0.000292358	-0.000611096	0.00047026	-6.32667e-05	-7.30199e-05	-8.7151e-05	-2.5099e-05	0.000293879	0.000145221	0.000117204	-0.000152841	0.000283027
	Var85	0.997676	0.0100604	0.0393198	-0.0263148	0.0444691	0.00176537	-0.0100391	0.00349227	-0.00931225	0.000337555	-0.000993694	-0.00223032	0.000396647	-0.00300009	0.000924921	-0.00185967	-0.0013362	0.0068363	-0.000781603	0.00270695	0.000829198	0.00134254	0.00261613	0.00158786	0.0022239	0.0038903	0.00157522	0.00207231	0.000934947	-4.98874e-05	-0.00189997	0.00046094	-4.63195e-05	-0.000443112	0.000831936	0.000408814	-0.000426651	0.000676753	-3.84096e-05	0.000116772	-8.66957e-05	-0.000619162	-0.000127037	4.95768e-06	-0.000366223	6.96015e-05	0.000228147	2.51167e-05
	Var86	0.99727	-0.0285302	0.0386873	-0.0234236	0.0468328	0.00309086	-0.0107092	0.00109176	-0.0123761	-0.00260218	0.00171129	-0.000331462	-3.66513e-05	-0.00422271	-0.00179167	-0.00301434	-0.00255307	0.00224327	-0.00365166	0.004474	0.00268485	0.000141265	0.00278756	0.00252183	0.000860333	0.000513761	-0.000398094	0.00197599	0.00035381	-0.00131053	-0.00106754	0.000796042	-0.000666732	-0.000750038	-0.00203739	-0.00040722	-0.000694679	0.000503603	-0.000170146	-7.27355e-05	0.000264703	3.63418e-05	0.000151474	-0.000273485	3.9771e-05	-0.000198805	-4.92617e-06	-0.000156144
	Var87	0.995825	-0.0616734	0.0378293	-0.0204519	0.0473558	0.00409788	-0.00808563	-0.00267654	-0.0127359	-0.00422342	0.00422591	0.000327024	0.00209721	-0.00386108	-0.00514884	-0.0021308	-0.00414585	-0.000205096	-0.00365165	0.00422534	0.00463821	-0.000690022	-5.51694e-06	0.00236184	0.000269606	-0.00297799	-0.00235281	-0.00144984	0.000391511	0.00017173	-0.000498576	-3.52675e-05	0.000223914	-0.000542429	-0.00210636	-0.000774171	-1.39662e-05	-0.000593796	0.000173006	-5.18387e-05	-6.82317e-05	0.000398707	0.000379457	0.000346389	0.000162949	7.6256e-05	-0.000176645	0.000203379
	Var88	0.993431	-0.0933057	0.0382209	-0.0157546	0.0480919	0.00351923	-0.00539222	-0.00386513	-0.0121859	-0.00167912	0.00231176	-0.0030404	0.00440936	-0.00250868	-0.00536719	0.000779683	-0.00340418	5.49723e-06	-0.00167534	0.0018076	0.00504742	-0.00109183	-0.00347783	0.00262376	0.000416089	-0.00323492	-0.00218673	-0.00177877	0.00139855	0.0012766	0.000750903	-0.000400312	0.000620445	0.000273263	0.00165593	-0.000252728	0.000733869	-0.000186806	-0.00016381	0.000356713	-0.000123822	3.63699e-05	0.000221542	5.01595e-05	-4.02949e-05	0.000306795	5.85062e-05	-8.22095e-05
	Var89	0.990417	-0.12262	0.0375418	-0.0103278	0.0471596	0.00281454	-0.00544292	-0.00181456	-0.0106663	0.000788636	-0.0007449	-0.00612911	0.00372541	-0.000370515	-0.00301606	0.0039827	-0.00122392	0.000740731	-0.00170523	-0.000432942	0.00285535	-0.000333315	-0.00491397	0.00115641	-0.00110354	0.00089872	-0.00216879	0.00233127	-0.0001384	0.000498734	0.00225313	-0.000543196	-0.00119691	6.1645e-05	0.00266415	9.48315e-05	0.000468626	0.000696597	-0.000203535	2.91069e-06	0.000395113	-8.49957e-05	-5.92713e-05	-0.000398356	0.000195769	-2.6457e-05	3.59201e-05	-3.1967e-05
	Var90	0.987196	-0.147741	0.0360567	-0.00563679	0.0448587	0.00477708	-0.00572404	0.00089543	-0.00877641	-0.000985834	-0.000145149	-0.00491268	0.00147417	0.00114882	-0.000580903	0.00422037	-0.000165131	0.00054183	-0.00275218	-0.00153415	-6.26551e-05	0.00217956	-0.00416787	-0.000591118	-0.00364247	0.00392729	-0.00107946	0.00416223	-0.00244375	-0.000761556	0.00184298	7.44813e-05	-0.00108501	0.000272497	-0.000726978	-2.28059e-05	7.10498e-05	-2.96248e-05	0.000102258	-0.00020321	5.30877e-05	0.000134071	-0.000221214	0.000290464	4.29126e-05	-0.00020103	8.38471e-05	0.000110303
	Var91	0.984137	-0.166763	0.0379375	-0.00151159	0.0443601	0.0082581	-0.00383019	0.001601	-0.00824305	-0.00280382	0.00179053	-0.00227707	0.000602181	0.000477337	0.00214177	0.00136408	2.44195e-05	-0.000256643	-0.00295534	-0.00152242	-0.00188641	0.00379819	-0.00443973	-0.000255654	-0.00219613	0.00107408	0.00221645	0.00156348	-0.00223639	-0.00114185	-0.000368575	0.00152587	0.00107987	0.000947539	-0.00174736	0.000510629	0.000885274	-0.000902442	4.6729e-05	0.000179421	-0.000636485	0.000101241	-0.000254205	5.3621e-05	-0.000164531	4.78326e-05	4.25879e-05	-0.000150147
	Var92	0.981177	-0.181981	0.0430703	-0.000248002	0.0447814	0.00922904	-0.00235969	0.00182908	-0.00940027	-0.00221942	0.00177011	-0.000455883	0.00148834	0.000171548	0.00489497	-0.00137556	0.00151341	-0.0014489	-0.00292617	8.51649e-05	-0.00315864	0.00346901	-0.00428882	0.00017078	0.00300068	-0.00292618	0.00351364	-0.00132726	-0.00117175	-0.000246628	-0.00110514	0.00190341	0.000415213	0.000356222	0.000453164	0.000886987	0.00108976	-0.000447264	-7.67631e-05	0.000210089	-8.65837e-05	-0.000411281	4.57806e-05	-0.000250332	6.58167e-05	0.000131862	-0.000316612	-1.00098e-06
	Var93	0.97772	-0.198898	0.0459807	-0.00276715	0.0452478	0.00636822	-0.00381318	0.00314144	-0.011049	-0.00213994	-0.00014878	0.000999384	0.00329258	0.00190058	0.00589706	-0.00226248	0.00301007	-0.00358642	-0.00149648	1.96025e-05	-0.00223099	0.00208019	-0.000434015	0.000655326	0.0058452	-0.0026442	0.00198881	-0.00142254	-0.0010321	0.000585139	-0.000347439	0.000628528	-0.00130961	-0.000118328	0.000723891	0.000215995	-0.000390164	0.000417811	4.93656e-05	-0.000171962	0.000556372	-0.000270404	9.39529e-05	-1.69258e-05	7.05306e-05	-0.000172813	0.000106715	-3.27816e-05
	Var94	0.973629	-0.217688	0.0451211	-0.0026633	0.0475735	0.00223953	-0.00595659	0.0046638	-0.0116307	-0.00143954	-0.00172971	0.000911432	0.00449394	0.003476	0.00507567	-0.00251046	0.00156178	-0.00493543	0.00125433	-0.00360712	0.000399688	0.000577951	0.0043351	0.00179372	0.0037064	0.000174939	-0.00054725	-0.00017779	-0.00113987	0.000615325	4.44161e-05	-0.000869228	-0.000979486	0.000768203	-0.000408497	-0.000407444	-0.000991716	0.000250652	-0.000155812	-0.000286442	-0.00031836	0.000549396	-0.000293783	-0.000191728	-0.000195015	-3.65329e-05	0.000313269	-4.2103e-05
	Var95	0.970029	-0.232864	0.0449263	0.00198649	0.0493993	0.00116581	-0.00607667	0.00601684	-0.0110615	0.00147234	-0.00181704	0.000397238	0.00382157	0.00357259	0.00366029	-0.00303855	-0.000937186	-0.00422163	0.00259964	-0.00507297	0.00047505	-0.000277388	0.00624356	0.000528182	-0.000351836	0.00198394	-0.00216211	-0.000282601	-0.000776563	-0.000302135	-4.14997e-05	-0.00113921	0.000250869	0.000905934	-0.000234426	-0.000286817	0.000439523	7.86983e-05	-0.000593641	0.000285098	-0.000432979	0.000411128	8.14937e-05	0.000146201	-0.000119232	0.000325831	-0.00029222	3.74569e-05
	Var96	0.967876	-0.24173	0.0464886	0.00509407	0.0478668	0.00317578	-0.00570095	0.00547308	-0.0102892	0.00353033	-0.00103441	0.00154939	0.00165929	0.00166556	0.00220555	-0.00338201	-0.00190221	-0.00410011	0.00129891	-0.00174736	-0.000703106	-0.00186599	0.00587805	-0.00222093	-0.00248607	0.00205271	-0.00161601	-0.000673363	-0.000122989	-0.00124521	1.50455e-05	4.59565e-05	0.000892936	-0.000615479	0.000412309	0.000709237	0.0013543	0.000223992	-6.74612e-05	0.000388565	0.000526932	-0.000425081	0.000393832	0.000291416	0.000193953	-4.86052e-05	-9.61757e-05	-0.000279813
	Var97	0.966175	-0.24875	0.0472128	0.00534694	0.0460339	0.00351178	-0.00638777	0.00295348	-0.00988838	0.00303548	-0.000592787	0.00216949	-0.000194155	-0.00207998	0.000366137	-0.00241072	-0.00153837	-0.00323607	-0.000339955	4.39976e-05	-0.000952737	-0.00398211	0.00357808	-0.00346035	-0.00177581	7.94452e-05	-0.000399589	0.000574715	0.00136264	-0.000429835	0.00119909	0.000944256	0.000715612	-0.000761015	0.000254049	0.00162427	-8.18219e-05	-0.000422063	0.00071729	-0.000447708	-0.000136889	-0.000518697	-1.11708e-05	-0.000168734	0.000239922	-0.000228073	8.04179e-05	-5.2335e-06
	Var98	0.964042	-0.256928	0.0471753	0.00539194	0.0461149	0.00220209	-0.00588169	0.00138905	-0.00897317	0.00276653	-0.000442653	0.00138431	-0.000241936	-0.00424363	-0.00105288	-0.000157826	-0.000610874	0.00126041	-0.000394027	-0.00302154	-0.00155803	-0.00461137	-0.000180893	-0.00377167	0.000300273	-0.00271591	0.00113662	0.00197134	0.00276172	0.00107566	0.00177663	-0.000197058	0.000713339	0.00116673	-0.000522257	0.000667933	-0.0011281	-0.000480368	0.000408508	-0.00060426	-0.000452104	7.58992e-05	4.8116e-05	-0.000297259	-0.000300101	0.000110621	-0.000130078	0.000419919
	Var99	0.961878	-0.264475	0.0480921	0.00502998	0.0477822	0.00243292	-0.00407912	0.0022358	-0.00669212	0.00267226	-0.000642674	0.00181	0.000645632	-0.0037215	-0.00124402	0.00156791	0.00051444	0.00494502	8.96616e-05	-0.00539526	-0.00220004	-0.00433032	-0.00129251	-0.00220586	0.00063725	-0.00332623	0.00299268	0.0016585	0.00211668	0.000705373	-0.000158733	-0.0017104	0.00103105	0.00132268	-0.000314715	-0.00129845	0.000530486	0.000598754	-0.000625644	0.000306438	0.000687143	0.000279304	-0.000339162	0.000372891	-8.88738e-06	-0.000166965	0.000121093	-0.000346006
	Correlations between variables and factors:
		F1	F2	F3	F4	F5	F6	F7	F8	F9	F10	F11	F12	F13	F14	F15	F16	F17	F18	F19	F20	F21	F22	F23	F24	F25	F26	F27	F28	F29	F30	F31	F32	F33	F34	F35	F36	F37	F38	F39	F40	F41	F42	F43	F44	F45	F46	F47	F48
	Var1	-0.986586	-0.0424725	0.0537298	-0.0388963	0.0276452	0.139452	-0.00979692	-0.00549763	0.00933859	-0.000151078	-0.000366928	0.00385728	-0.00141441	0.000264251	0.000301714	0.000648574	0.000761939	5.49188e-05	4.98613e-05	-0.000160181	0.000633593	-0.000373341	0.000646891	-8.09248e-05	5.13675e-05	0.000311766	-0.000438855	0.000236743	0.000181548	0.000185241	-0.000107269	-9.19952e-05	1.44763e-05	1.72103e-05	9.29963e-05	-0.000137937	-2.09584e-05	2.71739e-05	-4.27379e-07	-6.07002e-06	-1.03698e-05	8.34427e-06	1.57966e-05	-7.33937e-06	2.79554e-05	2.69179e-05	3.02082e-06	1.44178e-06
	Var2	0.909098	-0.412337	0.0252994	0.00591957	0.0465016	-0.00352148	0.00978015	-0.0037157	-0.00131528	0.00764956	0.0121702	0.00634439	0.0022223	0.00999748	0.00516748	-0.00115309	0.0104763	0.00317484	0.000390123	0.00533354	0.00228029	-0.00074388	-0.00118769	-0.000940343	-0.00282654	-0.000801409	-0.000998912	-6.47368e-05	-0.00159132	0.00127316	-0.000863904	-0.000711644	0.000577731	0.0022674	-0.000452817	-0.00075094	-0.000201621	0.000446601	-2.4618e-05	-8.29883e-05	0.000284754	-0.00049954	0.000526569	0.000234991	0.000115708	-6.06225e-05	0.000140177	0.000234299
	Var3	0.913501	-0.402878	0.0244852	0.00330227	0.0430464	-0.00109616	0.0124756	-0.00304175	0.00187522	0.00551087	0.0174215	0.00264564	-0.00271732	0.01233	0.00318135	0.000216243	0.00393653	0.00189525	-0.000547561	0.0022759	0.00181338	-0.0038498	-0.000545081	0.00143882	0.00183249	0.00138638	-0.000156747	0.000151215	0.000731689	-0.000311803	0.00219221	-0.00116517	0.000217961	-0.00169067	-0.000342345	8.92248e-05	-0.000181117	-0.000614284	0.000664047	7.55127e-05	-0.000185968	-3.24621e-05	-0.000517852	-0.000178803	0.000100421	0.000133772	-0.000216425	-0.000148145
	Var4	0.918219	-0.392032	0.0242256	0.00321424	0.0417005	-0.000758534	0.013656	-0.007644	0.0031867	0.00433819	0.0181767	0.00231601	-0.00878922	0.00817773	-0.000573225	0.00535903	-0.0056371	0.000499449	0.000168938	-0.00208271	-0.00213795	-0.00322112	0.000799353	0.000990814	0.00196761	-0.000129019	0.000482342	0.000424553	0.000366676	-0.00125455	0.000173667	0.00152864	-0.00034748	-0.000996035	0.000542454	0.000705048	1.46017e-05	-2.36578e-05	-0.000769159	0.000365198	1.99668e-05	0.000351071	0.000186743	-0.000167166	-0.000296257	6.84576e-05	9.86224e-05	5.88416e-05
	Var5	0.924548	-0.376979	0.0210514	0.00629676	0.0424605	-0.00344404	0.0107078	-0.0175003	0.00322377	0.00350954	0.00862709	0.0041485	-0.00617826	-0.000783195	-0.0045263	0.0112001	-0.00598723	-0.00194845	0.00146773	-0.00291743	-0.00260269	0.00286327	0.00166619	0.000330406	0.000188806	-0.00186737	-0.000403506	0.000980547	-0.000117848	-0.000183796	-0.00232825	0.000304485	-0.000543132	0.000560555	4.40345e-05	0.000243315	-0.000733646	0.000351232	-6.65799e-05	-1.14519e-05	-0.000203991	-4.20035e-05	5.99127e-05	0.000362591	0.000376408	-0.000236127	2.77259e-05	-5.65423e-05
	Var6	0.933607	-0.353931	0.0180826	0.00750609	0.0434435	-0.00515192	0.00557802	-0.0218133	0.00411784	0.00423834	-0.00313646	0.00199551	0.00564627	-0.00328162	-0.0067163	0.00941164	0.00379307	-0.0027928	0.000571791	-0.00225236	3.36059e-07	0.00581325	0.00333203	0.00113343	-0.00021153	-0.000107535	-3.25586e-05	0.000266285	0.000885367	0.000848393	-0.000915891	-0.0019753	0.000714779	0.00022869	-0.00026244	0.00045158	-0.000147569	-0.000173383	0.000890841	-0.000127056	9.26815e-05	-0.000446935	3.34897e-05	-8.2726e-05	-0.000243478	0.000231258	-0.000202912	-0.000102607
	Var7	0.942817	-0.32834	0.0169428	0.00622879	0.0461895	-0.0021342	0.00390682	-0.0168952	0.00859344	0.00642659	-0.00701144	-0.0056052	0.0137191	-0.000880773	-0.00597362	0.00151515	0.00856497	-0.000615908	-0.0020615	-0.0018073	0.000411048	0.00132422	0.00290738	0.000511057	0.000642016	0.00169862	0.00148128	-0.000743942	0.000713275	-0.000867034	0.000841901	0.000420712	0.000544995	-0.00100731	2.88034e-05	-0.000213408	0.00050086	-0.000351443	-0.000293272	0.000355559	7.50873e-05	0.000253853	0.000146354	-0.000264143	-0.000259853	-0.000243434	0.000140104	0.000236247
	Var8	0.951339	-0.302158	0.0165044	0.00370107	0.0508241	0.0012019	0.00806169	-0.0113667	0.0132426	0.0064819	-0.00276752	-0.0119599	0.0107121	-0.000391429	-0.0038897	-0.00521624	0.00320958	0.000729127	-0.00376034	0.000998423	-0.00298028	-0.00400002	-0.00072855	-0.00150735	1.16549e-06	0.000470048	0.000339853	-0.00125495	-6.58895e-05	-0.00161412	-0.000324731	0.00202663	-0.00106629	-0.000604354	-2.75974e-05	-0.000401231	-0.000702443	0.000314636	-0.000220377	-7.68076e-05	-7.91468e-05	0.000427652	-0.000126407	0.000437914	0.000421873	-4.64689e-05	-8.96495e-05	-0.000102407
	Var9	0.961909	-0.265593	0.0178862	-0.000924024	0.0551237	0.00177398	0.0153125	-0.010214	0.0122461	0.00308071	0.00447338	-0.0112469	0.00140171	-0.00443131	-0.000716726	-0.00856964	-0.00367841	-0.000569766	-0.00112595	0.00484987	-0.00548097	-0.00252586	-0.000902837	-0.00211675	-0.00153601	-0.000226736	-0.00122015	-0.00065215	-0.000469484	0.000515874	-0.00117603	-0.000786336	-0.00095118	0.000749912	6.37403e-05	0.000422596	-3.41996e-06	0.000213919	-0.000293458	-0.000452411	-8.95139e-05	-0.000191171	-0.000219608	-0.000164884	-0.000254838	0.00042968	-2.17677e-05	-0.000245383
	Var10	0.973634	-0.217329	0.0192728	-0.00549849	0.0587054	0.0010464	0.0200782	-0.0101758	0.00901011	-0.00211562	0.00817878	-0.00374475	-0.00507169	-0.0106754	0.00560097	-0.00649351	-0.00467931	0.000405968	0.00325518	0.00320176	-0.00156879	0.00291893	0.00178252	-0.00067789	-0.000257855	0.000204059	0.000239672	-3.92817e-05	-0.00127718	0.00109132	0.0014334	-0.00225142	-0.000563899	0.000242364	1.93593e-05	-0.000356563	0.00102464	-0.000231342	-0.000284649	0.000166841	-0.000131718	-6.1261e-05	8.35632e-05	-0.000262148	-0.000224588	-0.000288798	0.000175117	0.000294285
	Var11	0.984457	-0.159638	0.017373	-0.0086808	0.0636547	-0.003327	0.0192779	-0.00845492	0.0088573	-0.00328252	0.00264838	0.00624565	-0.00367274	-0.0110068	0.0114064	-0.00222534	-0.000783851	0.00273801	0.00225644	-0.00320573	0.00516007	0.00324783	0.000466374	0.000564265	-0.000253611	0.000394288	0.000940053	-0.000976615	-0.000515382	-0.00107599	0.00234204	0.00077634	-0.000133042	-0.000352975	0.000189176	-0.000540513	-0.000284307	0.00011962	0.000505125	-5.07959e-05	0.000371428	0.000183472	0.000161834	0.00037606	0.000117043	-0.000116143	-0.000114637	-4.1887e-05
	Var12	0.993121	-0.0887128	0.0170816	-0.00833673	0.0675382	-0.0082629	0.0147317	-0.00530227	0.0113148	-0.000950524	-0.0104716	0.0133486	0.00135115	-0.00247621	0.00981206	-0.000168658	-0.000132534	-0.000290085	-0.0016919	-0.00397781	0.00641249	-0.00107844	-0.00265213	-0.00030541	-0.00209908	-0.000266373	-0.00100241	-0.000357005	0.000672451	-0.000263473	-0.0012076	0.00236403	0.000534417	-0.000251463	0.000469783	0.000245479	-0.000369619	5.20191e-05	-0.000306652	-0.000334317	-5.50829e-05	9.47867e-05	-0.000477566	-0.00013352	4.82089e-05	0.000358006	3.27568e-05	-9.85376e-05
	Var13	0.996987	-0.00678042	0.0267422	-0.00298647	0.0653244	-0.00708242	0.00919405	0.00165909	0.016029	0.000283158	-0.0162074	0.0132781	0.00411244	0.0062186	0.00225331	0.000402236	-0.00516693	-0.00453535	-0.00271183	0.00225414	0.00136783	-0.00232806	-0.00236861	-0.000601362	0.000351742	-0.000401194	-0.000874763	0.00216534	0.000260091	0.0016976	-0.00163927	-0.000357742	-0.000264689	-0.000525532	-6.76019e-06	-0.000127211	0.000336754	-0.000212408	-0.000401869	0.000224524	-0.000320473	-0.000228267	0.00011954	-0.000277934	7.19795e-05	-0.000265755	9.14398e-05	0.000195555
	Var14	0.993609	0.0798895	0.0452638	0.00254207	0.0584454	-0.000318024	0.00596247	0.0142583	0.0173091	0.00518203	-0.00888695	0.00560299	0.00330709	0.00763866	-0.00386607	-0.00101675	-0.00822152	-0.00269669	-0.00145947	0.00514427	-0.00191406	0.00201991	-0.000201346	0.00125721	0.00181628	0.000856293	0.00207659	0.000907314	0.000326982	0.00072568	0.00165117	-0.000723824	0.000221257	0.000486175	-0.000358795	-0.000582582	0.00013102	0.000154012	0.000699004	0.00011776	0.000244156	-8.11493e-05	0.00029039	0.000318377	-0.000165033	-0.000137348	-8.74338e-05	-8.42866e-05
	Var15	0.982132	0.164464	0.0678522	0.00645889	0.0507618	0.00625218	0.00895079	0.0237956	0.0123141	0.011985	-0.00140321	-0.00618536	-0.000521785	0.00439913	-0.00552958	-0.00129316	-0.00370573	0.00265101	0.000702703	0.000213279	0.0024994	0.00503842	0.00180193	0.00102024	-0.000451564	-0.000950597	0.00177503	-0.00155929	2.79674e-05	-0.000794567	0.00181097	0.000559243	0.00149789	0.00119526	0.000228377	0.000412267	-0.000594051	7.75547e-05	-0.000161059	-0.000257854	0.000159441	0.00027652	-0.000519891	0.000168725	6.38605e-06	0.000181756	9.24695e-06	4.74435e-05
	Var16	0.963818	0.241182	0.0967924	0.0149715	0.0432958	0.00610227	0.0150096	0.0258806	0.0102593	0.00966768	0.00150453	-0.0130145	-0.00374681	-0.000783335	-0.0028019	0.000889633	0.00287029	0.00346543	0.00121848	-0.00526717	0.00477682	0.00146824	0.000763473	-0.000714497	-0.000645586	-0.00315645	-0.00159037	-0.000157233	-0.000502317	-0.000991873	-0.00126688	-0.0003123	-0.000254352	-0.000530901	-0.000178232	0.000589763	-0.000237439	4.54729e-05	-0.000239639	0.000205647	-5.94484e-05	-0.000364732	0.000258432	-0.000393794	3.35447e-05	-0.000234972	6.13498e-05	3.73119e-05
	Var17	0.939776	0.309507	0.132673	0.0317675	0.035429	0.00230919	0.0163072	0.0246211	0.00986301	-0.00120705	0.00325075	-0.00497419	-0.00215649	-0.00721322	0.00122323	0.00377511	0.00577506	-0.00234356	-0.000565899	-0.00252433	-0.00213168	-0.00225007	-0.00154844	0.000591982	0.00121551	-0.000669202	-0.00221356	0.00155221	0.000135408	6.02713e-05	-0.0017646	-0.000962057	-0.000950984	-0.00112073	-0.000536145	-0.00055862	0.000789861	-0.000117109	0.00060171	0.000132119	-0.000345245	-0.000177525	0.000323591	7.44173e-05	4.63707e-05	0.000143117	-6.45822e-05	1.72659e-05
	Var18	0.90954	0.371614	0.173377	0.0529991	0.0278957	0.00151535	0.0139166	0.0174889	0.00440015	-0.011754	0.00407723	0.00870854	0.00126328	-0.00937831	-0.000544226	0.00579109	0.0058175	-0.00393419	0.000143616	0.00491861	-0.00472056	-0.00296326	0.000398397	0.00280442	0.0005135	0.00188373	0.00024277	0.000755525	0.000359453	-0.00014517	0.000431198	-0.000355634	0.000449012	0.000359301	0.000613094	9.01178e-05	-0.000263389	-0.000306685	-0.000258466	-0.000109725	2.57751e-05	0.000475078	-0.000244131	0.000200084	0.000218194	0.000130441	-3.65029e-05	-8.96643e-06
	Var19	0.866655	0.439756	0.221613	0.0714057	0.0219684	0.00230042	0.0128721	0.00416662	-0.000293373	-0.0190114	0.00387324	0.0107021	0.00178717	-0.00225805	-0.00899852	0.00224324	0.00259094	0.00171198	0.00220809	0.00323116	0.00130963	-0.00271831	0.00220445	0.00129665	-0.00189232	0.00135726	0.0019756	-0.00163648	-0.00072634	-0.000233677	0.000503826	0.000997396	-5.22432e-05	0.0006738	0.000342723	0.000794771	-7.64641e-05	0.000353835	-0.000469057	9.74458e-05	9.3894e-05	-0.000144787	2.75518e-05	-0.000254989	-0.000217831	-0.000115473	5.88959e-05	-8.8644e-05
	Var20	0.788675	0.534529	0.288053	0.0896791	0.0164124	0.00160079	0.0118206	-0.00708313	0.000118188	-0.0236532	0.00171071	0.000635241	-0.00131651	0.0064814	-0.0101841	-0.00494086	-0.00142055	0.00170278	0.000630687	-0.00535501	0.0028939	-0.00050315	-0.000302693	-0.00255159	4.56655e-06	0.000462041	0.00110509	-0.0015854	-0.00107273	0.000264134	-0.000318886	0.000497312	-0.000457947	-9.3917e-05	-0.000497059	-0.000256256	0.000591731	0.000140302	0.000178377	-0.000274436	-0.000281876	-0.000334797	-7.28134e-05	0.000166552	-3.79028e-05	9.99031e-07	-2.6793e-06	8.9864e-05
	Var21	0.605337	0.678308	0.39734	0.121256	0.0068807	0.00180136	0.00837703	-0.0114045	0.000826036	-0.017369	-0.00477147	-0.0126844	-0.00604597	0.00698033	0.00281939	-0.00342307	-0.000679331	-0.00277818	-0.00100947	-0.00280086	-0.00116157	0.00179061	-0.00150324	-0.00146462	0.00211453	0.000725194	-0.00188692	0.00104043	0.00101902	-0.0002483	3.05811e-05	-0.00107579	0.00107449	0.000334268	0.000192279	-0.000476726	-0.000948841	-0.000159363	0.000458117	0.000107164	0.000519831	6.76036e-05	3.63653e-05	-0.000163519	0.00028675	5.32996e-07	7.18547e-05	-4.50797e-07
	Var22	0.0957514	0.817258	0.544516	0.159709	-0.00999666	0.00180833	0.00167916	-0.0116234	-0.00637455	0.010221	-0.0125604	-0.0107742	-0.0090128	0.00130011	0.00885655	0.00648062	0.00142201	0.00095299	-0.00112057	0.00624606	0.000157681	-9.17127e-05	0.00181519	0.00172456	-0.000456942	-0.000725665	-0.000885527	-0.000254492	0.000897653	0.000437059	0.000297355	0.00051825	0.000715324	0.00019397	-0.000225529	0.000448399	0.000337884	0.000264036	-0.000373039	7.88681e-05	-0.00017818	0.000162786	2.47566e-05	0.000134583	-0.000267444	3.40048e-05	-8.97722e-05	-7.67117e-05
	Var23	-0.615828	0.607424	0.484143	0.126977	-0.0161467	-0.00083054	-0.00236177	-0.00673568	-0.00964313	0.0253569	-0.00469149	0.011246	-0.00392203	-0.00372243	-0.00398748	-0.00251557	-0.000180759	0.00167513	-0.000116042	-0.000506577	0.000870734	-0.00266146	0.000201031	0.00013961	0.00013371	-0.000619916	0.00237035	-0.000530281	-0.00224347	3.65243e-06	0.000204349	-0.000215956	-0.00146623	-0.00056209	-0.00027774	-0.000236106	0.000480696	-0.000239536	0.000220642	-0.000277188	-0.000219878	-1.72733e-05	-0.000193464	4.89948e-05	0.000270942	-6.25248e-05	8.49612e-05	4.25964e-06
	Var24	-0.884758	0.330129	0.320746	0.0678989	-0.0121794	-0.00114206	-0.0014492	-0.00204375	-0.00127591	0.0127941	0.00595759	0.0119402	0.00589613	-0.00325464	-0.00500137	-0.00977201	-0.000434183	-0.000744835	0.00296257	-0.00420719	-0.00221663	0.000936384	-0.00425649	0.00135744	0.00110869	0.0011258	-0.00191142	0.00137853	-0.000993027	-0.000467772	-0.000194299	-0.000745834	0.000349785	-6.7386e-05	0.000405373	3.7719e-05	-0.000636778	-0.000126279	0.000259083	0.000536495	0.000421674	-9.3266e-05	4.2637e-05	-0.000146585	-0.00020979	0.000190323	6.60074e-05	7.55889e-05
	Var25	-0.953662	0.193692	0.22632	0.0364973	-0.010419	-0.000815198	-0.000861526	-6.76593e-05	0.0024915	0.00307361	0.0103885	0.00238747	0.0112308	-0.000692071	0.000793801	-0.00438264	-0.00112599	0.000441206	0.00454854	-0.00124816	-0.00156948	0.00351988	-0.00335379	0.00177251	0.000866549	0.000383853	-0.00304147	0.00116458	0.00164529	0.000623159	-0.000251503	0.00121663	0.00164983	-0.000144792	-0.000280632	0.000644998	-8.41505e-05	0.0001443	-0.000716312	-1.82141e-05	-0.000323798	2.92418e-05	3.70484e-05	0.000272408	-0.00011104	-0.000270498	-0.000274368	-0.000104811
	Var26	-0.975655	0.127854	0.175807	0.0215335	-0.00826089	-0.000490806	0.000227663	0.00158645	0.00197069	0.000452274	0.0105752	-0.00382882	0.0110058	0.000105224	0.00318696	0.00148363	-0.00245579	-0.000217739	0.00414379	0.00128258	0.000458819	0.00199463	0.000551431	0.00035853	0.00036263	-0.000186543	-0.000435003	0.000618316	0.00225355	0.000971175	-0.00045329	0.00210509	0.000856095	0.00014461	-0.000642427	8.8036e-05	0.000572717	9.6597e-05	9.97009e-05	-0.000489491	-0.000282375	-2.12533e-05	-0.000116601	-0.000245402	0.000481988	-0.000224023	0.000320061	-7.84838e-05
	Var27	-0.984628	0.0925866	0.146691	0.0124248	-0.00518036	-0.000798723	0.00158821	0.00216494	0.000975988	0.000215814	0.00780722	-0.00542139	0.00869204	-0.000921977	0.00283183	0.0033556	-0.00319457	-0.0023514	0.0018682	0.00173825	0.00201006	-0.000928295	0.00239212	-0.000794375	-0.000532967	0.000108407	0.00147647	0.000531134	0.000852953	-9.10363e-05	-0.00058743	0.00118152	-1.23286e-05	0.000529979	-0.000100955	-0.00086934	0.000469514	-0.000124928	0.00104081	-8.7996e-05	0.000269394	-0.000202529	-0.000335094	-0.000292487	0.000251181	0.000286561	0.000433377	5.26116e-05
	Var28	-0.988961	0.0718305	0.128807	0.00642556	-0.00122864	-0.00115639	0.00205136	0.0016417	0.000238259	0.000172918	0.00531245	-0.00426415	0.00648316	-0.000974606	0.00262862	0.0032246	-0.00353693	-0.00277209	4.04917e-05	0.000914063	0.00287926	-0.00242312	0.0013675	-0.00106233	-0.00112694	0.000346942	0.00183148	0.000848854	-0.000557923	-0.000982682	-0.000854924	-0.000166586	-0.000492099	0.000470072	0.000295563	-0.000978563	-0.000272131	-0.000248029	0.000467715	0.000311208	0.000455038	-0.000262726	-0.00042129	8.21714e-05	-0.00016072	0.000251555	-0.000347399	-4.26987e-05
	Var29	-0.991369	0.0581528	0.116931	0.00176031	0.00460434	-0.000696427	0.00150365	0.00125212	-0.000122116	0.000559697	0.00411336	-0.00289867	0.00469335	8.41807e-05	0.00234244	0.0030026	-0.0032315	-0.00205669	-3.0954e-05	5.70182e-05	0.00297548	-0.00211752	-0.00017003	-0.00113269	-0.000701375	0.000298301	0.00167772	0.000799683	-0.00123243	-0.00122708	-0.00160913	-0.000682835	-0.000731208	0.000221612	0.00025757	-0.000295922	-0.000531944	-0.00021745	-0.00038925	0.000284381	0.000303935	-5.34446e-05	-6.19035e-05	9.6744e-05	-0.000254734	-3.02031e-05	-0.000417613	-6.1516e-05
	Var30	-0.992818	0.0475218	0.108717	-0.00340747	0.0126172	-0.000370918	0.000941575	0.00114522	-0.000161939	0.000820487	0.00315284	-0.00224781	0.00313343	0.000406356	0.00133267	0.00267985	-0.00195011	-0.00184101	0.000170483	0.000106811	0.00235031	-0.00134172	-0.000688426	-0.00154561	0.000240193	0.000102919	0.00133703	0.000219619	-0.00107038	-0.00137224	-0.00164837	-0.000264023	-0.000386311	4.41656e-05	0.000309519	1.31134e-05	-0.000110458	-0.00021253	-0.000393702	4.99661e-05	0.000195314	0.000298032	0.000460546	-6.54806e-05	-0.000219319	1.75321e-05	0.000113158	0.000208001
	Var31	-0.993682	0.037764	0.102833	-0.00965566	0.0217086	-0.00122268	0.000728201	0.00113642	-0.000190477	0.000365913	0.00201419	-0.00126187	0.00186102	6.32787e-05	0.000277798	0.00175929	-0.000525219	-0.00160647	-0.000212187	0.000818913	0.0013334	-0.000687442	-0.000386117	-0.0017884	0.000723527	-9.28723e-05	0.000545525	6.46667e-06	-0.000510485	-0.00146221	-0.000739529	0.000352174	0.000282986	-1.73955e-05	0.000540928	-0.000178764	0.000214928	-0.000268038	-0.000111743	-0.000343385	0.000248978	0.000443932	0.000518825	-0.00010409	-0.000330917	-3.91045e-06	0.000201081	0.000356818
	Var32	-0.994107	0.0283267	0.098409	-0.0168429	0.0309798	-0.00250114	0.000453948	0.00140016	-0.00046461	-0.000490061	0.000976297	0.000286508	0.000963324	-0.000103346	-7.3384e-05	0.000648498	0.000450933	-0.000528865	-0.000870801	0.001359	0.000401613	3.54502e-05	6.62376e-05	-0.00143661	0.000431708	-0.000278356	-0.000361665	9.00201e-05	-0.000286774	-0.00132029	-6.49679e-05	0.000593134	0.000535583	6.24279e-05	0.000772033	-0.000278263	-5.23745e-06	-0.000125214	-7.31509e-05	-0.000704964	5.21949e-05	0.000252083	0.000223063	-3.36343e-05	-0.000557719	-0.000267776	-4.93865e-05	1.43936e-05
	Var33	-0.994114	0.0195363	0.0955245	-0.0244806	0.0399712	-0.00322819	0.000300755	0.00188775	-0.000937335	-0.00108413	0.000376376	0.00178839	0.000241638	-0.000368918	-0.000137763	-8.13612e-05	0.000945009	0.000558722	-0.00187454	0.00152153	-0.000264131	0.000729214	0.000386109	-0.00127755	-0.000432934	-0.000483521	-0.00108119	-9.50246e-05	-0.000193107	-0.000843272	0.000110683	0.000561651	7.26194e-05	0.00033847	0.000786225	-0.000142597	-0.000605024	9.77222e-05	3.46704e-05	-0.000241937	-0.000486919	-1.68666e-05	0.000174624	4.01106e-05	-0.000469425	-0.000317029	-0.000143271	-0.000303567
	Var34	-0.993822	0.0118892	0.0939488	-0.0318993	0.0477193	-0.00341248	0.000426442	0.00216002	-0.00163832	-0.00115793	7.84149e-05	0.00282829	-0.000527256	-0.000793677	-0.000326143	-0.000601747	0.00095913	0.00065543	-0.00287989	0.0014799	-0.000587159	0.00127714	0.000507577	-0.00155756	-0.0012876	-0.000533808	-0.00149024	-0.000514451	0.000263883	-0.000415791	0.000124837	0.000467542	-0.000745442	0.000626636	0.000404239	0.000212222	-0.00102274	7.22498e-05	0.000330941	0.000848165	-0.000685673	-0.000159535	0.000166128	6.82265e-05	-0.000135996	-0.000165394	3.32272e-06	-9.80859e-05
	Var35	-0.993459	0.00548756	0.0930042	-0.0378793	0.0535205	-0.00303363	0.000660656	0.00199428	-0.00252656	-0.00110875	-5.3762e-05	0.00294293	-0.00108906	-0.000665234	-0.000156313	-0.000824251	0.000644171	5.93927e-05	-0.00306401	0.00125249	-0.000779467	0.00157336	0.000450949	-0.00132672	-0.00154051	-0.000481487	-0.00132683	-0.00115053	0.000903724	-0.000419624	-7.20863e-05	0.000108823	-0.000897724	0.000752297	-4.92085e-05	0.000628354	-0.000864067	-0.000346753	0.000343692	0.00116655	-7.98148e-05	-0.000176978	-0.000203464	4.06324e-05	5.34619e-05	-1.91255e-05	0.000184897	0.000109153
	Var36	-0.993148	0.000355227	0.0928187	-0.0415466	0.0571707	-0.00225254	0.00115584	0.00174697	-0.00296034	-0.00148619	7.69801e-05	0.00194291	-0.00123823	-0.000102234	0.000387069	-0.000268163	0.000333996	-0.000493555	-0.0024689	0.000998896	-0.000980215	0.00138351	0.000100051	-0.000492054	-0.00139652	-0.000423267	-0.000993776	-0.00166481	0.00118374	-0.000421315	-0.000437719	-0.00058918	2.30387e-05	0.000413005	-0.000151787	0.000836186	-0.000269221	-0.000858517	4.66456e-05	0.000510651	0.000772162	-2.11719e-05	-0.00044851	0.000112598	1.98993e-05	-2.80152e-05	0.000199981	3.31664e-05
	Var37	-0.992928	-0.00306892	0.0935351	-0.0436149	0.0582233	-0.00179085	0.0021722	0.00179224	-0.00285179	-0.00221891	0.000418296	0.000808125	-0.00107603	0.00056013	0.00086197	0.000326214	0.000597356	-0.000706733	-0.00164237	0.000600528	-0.00100482	0.0010285	-0.000850548	8.59363e-05	-0.00129234	-0.000152015	-0.000884687	-0.00129132	0.00117126	-0.000122327	-0.000486708	-0.00114214	0.000545781	-0.000634159	-7.04028e-05	0.000582014	0.000154288	-0.000483263	-0.000262729	-0.000424308	0.00093897	0.000146098	-0.000421007	0.000166047	-0.000195836	-0.000202516	1.45721e-05	3.60365e-05
	Var38	-0.992911	-0.00459305	0.0943869	-0.0444384	0.0562684	-0.00199017	0.00352496	0.00190354	-0.00294217	-0.00251446	0.000978566	0.00100823	-0.000531749	0.00106408	0.00101359	0.000236936	0.00106102	-0.000855279	-0.00129793	-0.000266285	-0.000931165	0.00142834	-0.00186898	-0.000112736	-0.00106952	-0.000180966	-0.000278759	-0.000289406	0.000998964	0.000117803	-0.000101343	-0.00120335	5.90022e-05	-0.00159087	-0.0003578	-3.0622e-06	-0.000152864	0.000554864	-0.000459802	-0.000972179	0.000304538	-5.7747e-05	-0.000301578	9.9836e-05	-0.000326926	-1.69659e-05	-6.24416e-05	3.33839e-05
	Var39	-0.993199	-0.00434431	0.0943032	-0.0427553	0.0524151	-0.00236764	0.00428763	0.00199481	-0.00287255	-0.00173039	0.00176199	0.00183169	4.85191e-05	0.000577258	0.000409282	-4.4762e-05	0.000640618	-0.000858278	-0.00160132	-0.000815483	-0.000653936	0.00208101	-0.00162652	-0.000769051	-0.000807099	-0.000839063	0.000905797	0.000175933	0.000133285	0.000372669	0.000104432	-0.00094143	-6.66587e-05	-0.00183808	-0.000779795	-5.32755e-05	-0.00038571	0.00104619	0.000236452	-0.000294804	-0.00021534	-3.51341e-05	3.44494e-06	0.0001675	-0.000175211	0.000312547	0.000195496	-0.000104092
	Var40	-0.993683	-0.00277092	0.093185	-0.0385765	0.0485335	-0.00269667	0.00403702	0.00208107	-0.00135104	-0.000638064	0.00250118	0.0013862	0.000399011	0.000562615	-0.000434231	-0.000532038	-0.000121914	0.000448029	-0.00206676	-0.000676306	-0.000500004	0.00142758	6.96974e-05	-0.000891268	-0.00111716	-0.0010779	0.00119219	-5.59659e-05	-0.000978245	0.00148353	-0.000221564	-0.000411696	0.000190381	-0.00121173	-0.000242643	0.000557993	0.000385825	0.000828537	0.00127237	0.00044029	4.01867e-05	0.00076449	0.000185412	-2.8888e-06	-7.13393e-06	1.80402e-05	0.000156329	-0.000215348
	Var41	-0.994178	0.000427111	0.0915867	-0.0337832	0.0446936	-0.00324596	0.00411581	0.00212933	0.000305103	-0.000587718	0.00270362	-0.000185556	0.000496192	0.0024027	-0.00036482	-0.0010341	0.000120695	0.00246523	-0.00241739	-0.00119821	-0.000315758	0.00014773	0.0021263	0.000144573	-0.00175367	-0.000257276	0.000125458	-0.000178866	-0.00093699	0.0031274	-0.000911818	0.00023254	-0.000313314	0.000116111	0.000827384	0.000509111	0.000869247	0.000145992	0.000953139	-0.000215132	0.000122886	0.000892948	6.03541e-05	-0.000268951	-0.000159881	-0.000185387	-0.000271189	-0.000104748
	Var42	-0.994738	0.00600298	0.0885405	-0.0298481	0.0402656	-0.00350243	0.00493632	0.00235044	-1.21853e-05	-0.000720211	0.00195153	-0.0015008	-0.000204914	0.00303385	0.00018296	-0.00090442	0.000520122	0.00236284	-0.00235352	-0.00255551	-0.000214721	-0.000240419	0.00325732	0.00142148	-0.00135173	0.000602832	-0.000546407	1.1874e-05	0.000472203	0.00334737	-0.00113834	0.000753685	-0.00127814	0.000484642	0.000919715	-0.000502507	0.000456774	-0.000512782	-0.000133758	-0.000512652	-0.000369326	3.20082e-05	-0.00023318	0.000265361	-0.000137566	-4.23792e-05	-7.51016e-05	8.12901e-05
	Var43	-0.9954	0.0136931	0.0832666	-0.0278536	0.0345637	-0.0031962	0.00480896	0.00210605	-9.33382e-05	-0.000300069	0.000678976	-0.00179701	-0.00128017	0.00091938	0.000583869	-0.00022633	5.78361e-05	0.000822355	-0.00224727	-0.00349511	-0.00178051	-0.000325773	0.0021492	0.00149647	-0.000663073	0.000772213	0.000223674	-6.97235e-05	0.00146719	0.00248732	0.000338385	0.00141308	-0.00123591	-0.00028171	-4.38168e-05	-0.0011256	0.000108189	-0.000596238	-0.000783543	0.000316544	-7.08556e-05	-0.000426905	-0.00019923	0.000435878	0.00014167	-7.60882e-05	0.00022062	2.75119e-05
	Var44	-0.995858	0.0248399	0.0775646	-0.0272027	0.0284876	-0.0029838	0.00421089	0.00112571	0.00126079	0.000304141	-0.00030876	-0.00171534	-0.00182354	-0.000840995	0.000770633	0.000646868	-0.000235695	0.0005817	-0.00204853	-0.00335365	-0.00257786	-0.000575228	0.000330778	0.00136883	-0.000826647	0.00109048	0.00103962	-4.78953e-05	0.00111987	0.00191309	0.00197876	0.00199089	-0.000183586	-0.000429365	-0.00110752	-0.00082192	-0.000190544	-0.000302099	-0.000540475	0.000502245	0.00057499	-0.000526012	0.000494719	-0.000329313	-0.000169566	0.000136826	-0.000193029	3.73029e-05
	Var45	-0.995861	0.0388762	0.0733723	-0.0257692	0.0253192	-0.00290118	0.00413635	0.000565149	0.00148504	0.00117944	-0.000391256	-0.00185522	-0.000715566	-0.00104686	0.000837004	0.00114319	-0.000492221	0.00020657	-0.0015811	-0.00243352	-0.00125018	-0.000674897	-8.36484e-05	0.00168539	-0.000502831	0.0016178	0.00101422	0.000141129	0.000166918	0.00101232	0.0015041	0.00136701	3.19e-05	0.000542568	-0.000776916	3.9499e-05	-0.00038254	5.12455e-05	9.17985e-05	-0.000260917	0.000394387	-0.00012171	0.000968337	-0.000315335	-4.98722e-05	0.000231055	-0.00017601	5.21171e-06
	Var46	-0.995562	0.0506411	0.0710781	-0.0231131	0.025551	-0.00213188	0.00382669	0.000777577	8.90164e-05	0.00143458	0.000627676	-0.00204091	0.00155505	-0.00125182	0.000929398	0.00126795	-0.00123047	-0.00118271	-0.00197272	-0.00162291	-0.000426298	-0.000570904	-0.000354724	0.00120675	-0.000101876	0.00160216	0.000903981	-0.00064049	-0.000654989	0.000452041	0.000767556	-0.000454164	-0.000435208	0.00100237	0.000293048	0.000932265	-0.000488504	0.000215943	-0.00018966	-0.000406379	-0.000168556	0.000444344	0.000618595	-6.60626e-06	0.000625351	0.000158381	8.40982e-05	-2.82875e-05
	Var47	-0.995293	0.0568172	0.070046	-0.020971	0.027482	-0.000764852	0.00278194	0.00066406	-0.00170846	0.000991878	0.00186226	-0.00240356	0.00259546	-0.00157074	0.00101542	0.00171932	-0.00155281	-0.00199728	-0.00241903	-0.000882851	0.000276766	-0.000137481	-0.000925259	0.000474741	-0.000158454	0.00113772	0.00123852	-0.00179272	-0.0006468	0.000502486	0.000951365	-0.00177841	-0.000284392	0.000331676	0.000195567	0.000827213	-0.000488416	0.000175225	-0.000623235	0.000240599	-0.000481272	0.000105144	-4.61504e-05	-0.000207777	0.00052691	-1.56106e-05	-7.16897e-05	8.85161e-05
	Var48	-0.995199	0.058175	0.0687215	-0.0211147	0.0310493	-0.000206867	0.00153709	0.000335859	-0.00283574	0.000293962	0.00242385	-0.00256263	0.00234644	-0.00142938	0.00104325	0.0023043	-0.00120375	-0.00219173	-0.00174663	-0.00023087	0.00121234	-6.46521e-05	-0.00111236	-0.00012111	-7.56996e-07	0.000781022	0.00150016	-0.00202301	-0.000186772	0.000159177	0.000879838	-0.00182146	0.000475117	-0.000275288	-0.000330508	-0.000211522	-0.000164722	0.000316982	-0.000363491	0.000357923	-0.000488862	-0.000444818	-0.000396878	-0.000183031	0.000131799	-0.00027895	-6.06905e-05	6.94135e-05
	Var49	-0.995233	0.0561162	0.0664448	-0.0244363	0.0361959	-0.00125785	0.00100713	0.00037801	-0.00264707	-0.000219736	0.0020674	-0.00152577	0.0014459	-0.000829184	0.00061928	0.00206141	-0.00064736	-0.00194997	-0.00121412	-4.0555e-05	0.000976893	-0.000237055	-0.00066238	-0.000702312	0.000510882	0.000505069	0.00126047	-0.00124329	9.70872e-05	-0.000468246	0.000623534	-0.00133211	0.00120722	-0.000549105	-0.00014217	-0.000805751	0.000137762	0.000479606	-0.000164255	-4.90317e-05	-0.000560757	-0.000467944	-0.000194796	5.10899e-05	7.15573e-05	-0.000164695	-2.0898e-06	8.93175e-05
	Var50	-0.99524	0.0511131	0.0638102	-0.0324221	0.041609	-0.0034462	0.00125674	0.000285162	-0.00143839	-0.000379976	0.000855688	0.000856067	-0.000213015	1.93027e-05	-0.000394488	0.00100084	-4.58799e-05	-0.000700187	-0.00155982	1.89848e-05	-0.000341053	0.00028883	0.00033025	-0.0010269	0.000974167	6.34693e-05	0.000570376	-0.000133321	-1.95044e-05	-0.00117651	0.000508629	-0.000863495	0.00129707	-0.000501394	0.000485689	-0.000636443	0.000146741	0.000410907	-0.00026122	-0.000348463	-0.000505169	-0.000295439	0.000228052	0.000160978	0.000183959	0.000147286	-8.28302e-05	0.000142864
	Var51	-0.99492	0.0441189	0.0609699	-0.0471186	0.0465866	-0.0058452	0.00195331	-0.000395246	-2.89415e-05	-0.000500463	-0.000787035	0.00326119	-0.00221609	0.000638293	-0.00167326	-0.000109179	0.000394137	0.00131566	-0.00214622	0.000328482	-0.00149129	0.00118381	0.00142617	-0.00099034	0.00110348	-0.000319861	-0.000431884	0.000704143	-0.000367505	-0.00182521	0.000243349	-0.000286026	0.00100304	-8.43481e-05	0.00078287	-0.000424569	0.000212824	0.000100341	-0.000276133	-0.000376683	-9.03108e-05	-0.000291214	0.000459862	0.000210631	0.000306666	0.000277852	1.57306e-05	-2.39038e-05
	Var52	-0.99385	0.0376936	0.0571547	-0.0687634	0.0519423	-0.00748223	0.0032518	-0.00143155	0.000570696	-0.000391529	-0.00208585	0.00420728	-0.00384921	0.000629781	-0.00261785	-0.000979811	0.000630801	0.00267873	-0.00207002	0.000667513	-0.00191169	0.00148572	0.00210117	-0.00045313	0.0012053	-0.000384244	-0.0012902	0.00116273	-0.000502301	-0.00191506	-7.15384e-05	0.000240792	0.000820793	0.000421335	0.000488991	-0.000499046	0.000523106	-0.000261596	-0.000156724	-0.000261372	0.000186713	-0.00016457	0.000214736	1.67833e-05	0.00036929	0.000208101	0.000143837	-0.00011187
	Var53	-0.99185	0.0368084	0.0504157	-0.0932516	0.058942	-0.00761742	0.0053175	-0.00260972	-0.000175365	0.000199584	-0.0028591	0.0030027	-0.00474817	0.000242269	-0.00298537	-0.0013383	0.0010631	0.00218313	-0.000461452	0.000798108	-0.00135728	0.000898942	0.00181409	0.0002452	0.00160421	-9.82881e-05	-0.00142762	0.00122813	-0.000387929	-0.00145956	-0.000168142	0.000448664	0.000571407	0.000743671	-2.63767e-05	-0.000626158	0.000689216	-0.000268817	-6.08201e-05	-0.000137132	5.23682e-05	0.000182376	-0.000368722	-0.000391007	0.000292407	1.10741e-05	-2.14638e-05	0.000106697
	Var54	-0.98941	0.0494549	0.037307	-0.111942	0.0672329	-0.00631817	0.00750276	-0.00352271	-0.00137854	0.000787912	-0.00370894	0.000183308	-0.00481238	-0.000137011	-0.00311672	-0.000921095	0.00170082	0.000217776	0.00259577	0.000849296	0.0001992	-0.000357606	0.000412996	0.000424953	0.00208786	0.000267526	-0.000889177	0.000895198	-0.000222022	-0.000823476	-0.00014008	0.000612303	5.20531e-05	0.00070409	-0.000362173	-0.000443212	0.000533749	0.000143892	-4.0536e-05	0.000123672	-0.000145437	0.000292449	-0.000611141	-0.000488667	6.80474e-05	-4.01009e-05	-0.000196667	0.000145117
	Var55	-0.986702	0.0854424	0.0136408	-0.114479	0.0748799	-0.00448451	0.00851409	-0.00380049	-0.00183042	0.000778789	-0.00469611	-0.002771	-0.0040226	-0.000265204	-0.00292418	-0.000458578	0.00208967	-0.00164095	0.00551736	0.000948369	0.00183827	-0.00169937	-0.00125248	0.000226653	0.00223649	0.000390182	-0.000189996	0.000548299	-5.14651e-05	-5.5867e-05	-1.4421e-06	0.000858796	-0.000527664	0.000524128	-0.000439934	0.000110689	0.000226359	0.000480979	0.000139765	0.000367229	-0.000160133	1.79541e-05	-0.000280215	-0.000193273	-5.42437e-05	8.27684e-05	-0.000160053	-0.000130883
	Var56	-0.979995	0.153986	-0.024772	-0.091951	0.0813669	-0.00306761	0.00662934	-0.00389341	-0.00127344	-0.000135795	-0.00528214	-0.00486496	-0.00222803	0.000134167	-0.00184136	-0.000373657	0.0018373	-0.00201893	0.00682606	0.000957684	0.00241688	-0.00259121	-0.00203704	0.000512811	0.00187125	0.000286688	0.000370552	0.00049133	2.07217e-05	0.00051086	0.000262634	0.000734282	-0.000712231	0.000482512	-0.000496929	0.000756051	-5.50071e-05	0.000227148	0.000400049	0.000180018	2.4613e-05	-0.00027872	0.00016515	0.000224515	-3.06914e-05	1.69525e-05	-3.17604e-05	-0.00017139
	Var57	-0.95734	0.259898	-0.0800282	-0.0407822	0.0879884	-0.00252328	0.000444483	-0.00408043	0.00019955	-0.00200188	-0.00514316	-0.00519491	0.000668962	0.000960145	4.27982e-05	-4.52647e-05	0.000760646	-0.000381747	0.00635413	0.000528213	0.0014925	-0.00303873	-0.00156617	0.00130324	0.000918269	-0.000285	0.000773468	0.000632594	-0.000304858	0.000335234	0.000325461	-0.000145184	-0.00021673	0.000185152	-0.000556734	0.00110233	-5.99921e-05	-0.000401889	0.000173112	-0.000136129	0.000142551	-0.000172361	0.000278948	0.000542312	-1.08372e-05	-4.87905e-05	0.00014612	4.22706e-05
	Var58	-0.900558	0.39629	-0.147207	0.0310366	0.0953691	-0.00282163	-0.00899118	-0.00391183	0.00228245	-0.00415516	-0.00409296	-0.00315363	0.00367359	0.00179762	0.00200456	0.000412436	-0.000528142	0.00258886	0.00446146	-0.000189569	-0.00053623	-0.00281757	-0.000117601	0.00189909	-0.000428289	-0.00151448	0.000802221	0.000751517	-0.00104157	-0.000327472	0.00022302	-0.0011627	0.000518042	-0.000533044	-0.000232509	0.000810686	8.45003e-05	-0.00072352	-0.000231131	-6.30123e-05	-8.50008e-05	3.71639e-05	0.000127597	0.000407095	2.02845e-05	-1.76662e-05	0.000169809	2.75478e-05
	Var59	-0.798757	0.543029	-0.214034	0.102035	0.102024	-0.00327337	-0.0179074	-0.00293153	0.00407543	-0.00510059	-0.00195072	-5.58242e-05	0.00488034	0.00196115	0.00305611	0.000624912	-0.00100024	0.00475078	0.00175948	-0.000483057	-0.00231808	-0.00135206	0.00132385	0.00191112	-0.00140116	-0.00240197	0.00030152	0.000568495	-0.00135757	-0.000735174	0.000168185	-0.00114297	0.000455201	-0.000756813	0.000178232	8.52244e-05	-7.48298e-05	-0.000373727	-0.000158606	0.000198341	-0.000188459	5.77009e-06	-6.34737e-05	-0.000202562	2.67952e-06	-5.58834e-05	2.04985e-06	-0.000123202
	Var60	-0.655371	0.681236	-0.270291	0.148028	0.10422	-0.00301552	-0.0219183	-0.00143933	0.00437806	-0.0032734	0.00114196	0.0020233	0.00334705	0.00107808	0.00229531	0.000660624	-0.000556885	0.00388243	-0.000376825	-0.000240751	-0.00215459	0.000706535	0.00151857	0.000852168	-0.00117942	-0.0015919	-0.000268698	0.000216865	-0.000513843	-0.000568433	-4.51174e-05	-0.000147147	-0.000441402	-0.000154908	3.34508e-05	-0.000339396	-0.000197023	0.000205568	7.08944e-05	0.000200887	5.75327e-05	1.52129e-05	-7.04941e-05	-0.000518008	8.68659e-05	0.000116474	-8.34133e-05	-1.43453e-05
	Var61	-0.479066	0.799854	-0.311699	0.154479	0.0966529	-0.00181302	-0.0180951	-0.000176907	0.00225591	0.00111467	0.00406424	0.00223529	-0.000274001	-0.000171082	0.000146565	0.00020762	0.00029003	0.000182209	-0.000947993	8.05391e-05	-0.000219836	0.00175464	0.000313596	-0.00108588	7.42789e-05	0.000416736	-0.000432865	-0.000161376	0.000954283	-4.89854e-05	-0.000131041	0.000690042	-0.000887262	0.000417271	-0.000167244	-0.000294066	2.88068e-05	0.000475851	0.00017088	-4.60943e-05	0.000101811	-6.22304e-06	4.32096e-05	-0.000126551	0.000119728	0.000204743	-0.000119157	0.000180779
	Var62	-0.283883	0.887372	-0.333859	0.120961	0.0756838	0.000150796	-0.00697883	0.000280947	-0.00135956	0.00526903	0.00544029	0.00110223	-0.00366388	-0.0010812	-0.00167284	-0.000336966	0.00110368	-0.00348798	-0.000816689	0.000232226	0.00151013	0.00140729	-0.000944729	-0.00234546	0.00121192	0.00175391	-0.000180468	-0.000420112	0.00159771	0.000320597	0.000157821	0.000848018	-0.000563778	0.000564754	8.31893e-05	-0.000175202	0.000249773	0.000481578	5.44498e-05	-0.000196582	-0.000106742	-1.58091e-05	-5.75046e-05	0.000290467	-7.75939e-05	-6.74991e-05	-0.000136249	7.54436e-05
	Var63	-0.0920775	0.935708	-0.331258	0.0633917	0.0446933	0.00258906	0.00764059	-0.000576417	-0.00459879	0.00682823	0.00489874	-0.00024448	-0.00418298	-0.00152043	-0.00217427	-0.000494109	0.00123311	-0.00486104	-0.00143883	0.000130745	0.00184649	0.000537515	-0.00102364	-0.00178171	0.00134941	0.00178047	3.22787e-05	-0.000285406	0.000946419	0.000391984	0.000111429	0.000537181	2.97205e-05	0.000312641	0.000368221	-0.000121191	0.000329172	-4.84432e-05	-8.63104e-05	-7.0086e-05	-3.21826e-05	0.00012269	-4.88829e-05	0.000222127	-0.000142362	-0.000219637	4.44104e-05	-0.000156304
	Var64	0.077518	0.94968	-0.302142	0.00639796	0.012859	0.00497419	0.0210026	-0.00210504	-0.00689036	0.00620048	0.00294036	-0.00112593	-0.00214846	-0.00129963	-0.00187386	-0.00070713	0.000405945	-0.00375479	-0.00250223	-0.000224912	0.00104911	-0.000266585	-0.000323012	-0.000178844	0.000691341	0.00111098	-7.42937e-05	1.38786e-05	-0.000227345	0.000467315	-0.000444537	0.000155722	0.000864886	-0.000162225	0.000167999	-0.000115133	6.54353e-05	-0.000680048	9.51754e-06	6.56601e-05	0.000268024	0.000168582	1.80193e-05	-7.15484e-05	-3.94374e-05	-0.000114938	0.000189575	-0.000107024
	Var65	0.220095	0.941786	-0.249523	-0.0335236	-0.0125225	0.00682922	0.029838	-0.00282559	-0.0082664	0.0045271	0.00052657	-0.00129692	0.000507562	-0.000440689	-0.00103274	-0.000817705	-0.000823987	-0.00113043	-0.00260285	-0.000776649	-2.30913e-05	-0.000825816	0.000346519	0.00116179	-0.000107639	0.00044303	-0.0001135	0.000114133	-0.00118869	0.000619715	-0.000721687	-8.23997e-05	0.00135149	-0.000261808	-0.000333796	-5.02185e-05	-0.000391161	-0.000440471	-5.89179e-05	-1.84417e-05	0.000249713	-3.0408e-05	-0.000102277	-0.000150756	-2.98666e-05	8.0661e-05	0.000135882	5.12504e-05
	Var66	0.338648	0.92101	-0.178802	-0.0542298	-0.0288529	0.008207	0.0335393	-0.00244403	-0.00893244	0.00245195	-0.00139146	-0.000479012	0.00315527	0.000513051	0.000486326	-0.000282187	-0.00163319	0.00141703	-0.00140407	-0.00118146	-0.00100204	-0.00104087	0.00063633	0.00153877	-0.000833603	2.11402e-05	3.87241e-05	1.36144e-05	-0.00132373	0.000508535	-0.00050635	-0.000235854	0.000941019	5.80364e-05	-0.000321298	0.000107621	-0.000443636	0.000236799	-0.000169813	-0.000153273	-8.70017e-05	-0.000284664	-7.53452e-05	4.74932e-06	-0.000133014	0.000228563	7.13726e-05	-2.63651e-05
	Var67	0.432917	0.892276	-0.0996899	-0.0622945	-0.0367309	0.00861357	0.0322461	-0.00183619	-0.00900294	0.000422153	-0.00235536	0.000795146	0.00542264	0.0013165	0.00199964	0.000496148	-0.00168034	0.00272105	-5.97572e-06	-0.000747403	-0.00181016	-0.000907836	0.00068858	0.0007563	-0.00125058	-0.000504965	1.17242e-05	4.46e-05	-0.00039411	-5.91647e-05	-0.000135996	-0.000226584	0.000216865	0.000156989	0.000155398	0.000158782	-0.000168561	0.000520893	0.000100975	-0.000107558	-0.000190153	-0.000186167	9.61024e-05	-2.85029e-05	-3.21328e-05	-7.60694e-07	-2.3757e-05	-5.15517e-05
	Var68	0.500573	0.861523	-0.0256451	-0.0650415	-0.0381259	0.00699036	0.0258163	-0.00138185	-0.00799506	-0.00112626	-0.00209205	0.00173914	0.00649272	0.00189795	0.00268219	0.000854755	-0.00105392	0.00285319	0.000828652	0.000254646	-0.0021081	-0.000196395	0.000780016	-0.000638098	-0.000716982	-0.00127148	-0.00017645	0.000326922	0.000851855	-0.000799771	0.000283804	-8.52748e-05	-0.000413888	2.97346e-05	0.000231547	1.94726e-05	4.42126e-05	0.000367852	0.000370071	0.000101236	6.61179e-05	0.000189432	0.000109664	-0.000150453	0.000246639	-0.000350166	-0.00021554	0.000127352
	Var69	0.544152	0.83471	0.0330414	-0.0669036	-0.035139	0.00375665	0.0151782	-0.0010046	-0.00523528	-0.0015422	-0.000637496	0.00240026	0.00602376	0.00193466	0.00243457	0.00114794	-7.71486e-05	0.00230265	0.00114729	0.000790687	-0.00162051	0.0012025	0.000810005	-0.00199328	0.000653385	-0.00166917	-0.000270255	0.000537004	0.00143211	-0.00112803	0.000894277	6.45919e-05	-0.00118433	-0.000114232	-5.04545e-05	-0.000104154	0.000285363	1.43332e-05	0.000144253	0.000296011	8.19048e-05	0.000214284	1.6785e-05	0.000111255	0.00012049	-0.000143537	-0.000299801	0.000175221
	Var70	0.570752	0.814323	0.0716993	-0.0706482	-0.0301822	0.000233287	0.00244617	-0.000991226	-0.000746933	-0.000864353	0.00113798	0.00276633	0.00466942	0.0015685	0.00156405	0.00173557	0.000574809	0.00141017	0.000769926	0.000698644	-0.000233608	0.00251858	0.000815299	-0.00274606	0.00132191	-0.00127747	-0.00026366	0.00056137	0.00121669	-0.000800949	0.00147786	-2.1543e-05	-0.00184308	-0.000242467	-8.05384e-05	8.4132e-05	0.000369628	-0.000374417	-0.00030451	0.000245158	-0.000207509	2.59769e-05	-6.73511e-07	0.000356542	-0.000250979	0.000315409	3.01279e-05	1.65606e-05
	Var71	0.588919	0.798896	0.0906646	-0.0768122	-0.025163	-0.00302054	-0.0100848	-0.00138559	0.0044189	4.90333e-05	0.00262782	0.00271115	0.00319843	0.00106821	0.000400001	0.00176975	0.000901908	0.000652205	-0.000288478	0.000620095	0.00138184	0.00267824	0.000882992	-0.00232944	0.00086403	-0.000649327	-0.000209245	0.000500878	0.00037721	-7.98104e-05	0.0013626	-0.000600335	-0.00177529	-0.000121098	-9.42097e-05	0.000354325	0.000188971	-0.000657132	-0.000426358	-0.000143703	-0.000207893	5.34342e-05	0.000116376	4.79245e-05	-0.000196801	0.000329726	0.000321316	-0.000249992
	Var72	0.607127	0.783971	0.0938407	-0.0835738	-0.0211399	-0.00565494	-0.0197604	-0.00207325	0.00881769	0.000568106	0.00402041	0.00210957	0.00154216	2.43581e-05	-0.000438238	0.000944142	0.00110512	1.68642e-05	-0.00133838	0.000574029	0.00220821	0.00138111	0.00104309	-0.00154187	0.000791702	-0.000198605	-9.58062e-05	0.0004114	-0.000630956	0.000828952	0.000462612	-0.00108563	-0.000905535	0.000164699	-0.00057971	0.000526575	0.00012259	-0.000447351	-0.000503274	-0.000477972	0.000177674	-0.000112648	7.31973e-05	-0.000305642	0.000156762	5.91061e-05	-3.28713e-05	-0.000318993
	Var73	0.632398	0.763841	0.0870009	-0.0888442	-0.0185908	-0.00732772	-0.02401	-0.00306112	0.0110643	0.000356738	0.00485865	0.000868459	-0.000240171	-0.00139446	-3.38316e-05	0.000257936	0.000766287	-0.000389502	-0.00200543	-1.04026e-05	0.00194128	-0.000723541	0.00112083	-0.00169384	0.0012107	0.000410398	-2.13852e-05	0.000493183	-0.000995566	0.00157372	-0.000419829	-0.000591177	0.000545844	0.000214902	-0.000977545	0.000952225	0.00012102	0.000394126	-0.000650131	-0.000137477	0.000495491	-0.000209344	-0.000188567	-0.000162877	0.000257466	-8.42217e-05	-0.000315016	2.81346e-05
	Var74	0.668311	0.733474	0.0769476	-0.0915231	-0.0161653	-0.00757632	-0.0239127	-0.00397284	0.0107349	-0.000630324	0.00456793	-0.00074653	-0.00129846	-0.00198821	0.00126832	0.000248519	0.000434247	-0.00010652	-0.00262336	-0.000628842	0.000636978	-0.00237137	0.000833695	-0.00162797	0.00112766	0.000588967	-0.000140027	0.000528391	-0.00102468	0.00140332	-0.000280972	0.000552984	0.00186167	-8.08167e-05	-0.000328669	0.000811334	1.95999e-05	0.000872252	-0.000155053	0.000679413	0.000147836	0.000289022	-9.05205e-05	0.000208833	-4.4097e-05	-8.51495e-06	0.00010035	0.000236799
	Var75	0.714571	0.689523	0.0686298	-0.0914627	-0.0121686	-0.00583531	-0.0231813	-0.00412512	0.00888569	-0.000994441	0.00383948	-0.00220711	-0.00102284	-0.00172995	0.00178347	0.000411753	0.00023048	-0.000445187	-0.0025077	-0.00109785	-0.000734216	-0.00277349	0.000565205	0.000504506	0.000707264	-0.000499949	-0.000476201	0.000147842	-0.00143473	0.000253407	0.000678878	0.00107602	0.00180377	-8.28921e-06	0.000908952	-0.000643546	-0.000168767	0.000228798	0.000715801	0.000483106	-0.000437566	0.000149863	2.48849e-05	0.000266492	-0.000232307	2.61374e-05	0.000202188	9.43396e-06
	Var76	0.767345	0.631489	0.0634319	-0.0880158	-0.00697543	-0.00350554	-0.0216168	-0.00284363	0.00648178	0.000677221	0.00314998	-0.00209759	-0.000611756	-0.000762966	0.000989413	3.98314e-05	-0.000598045	-0.00154483	-0.0013775	-0.00243368	-0.00119802	-0.00226369	0.00023948	0.00344779	-5.03613e-05	-0.00113743	-0.000785988	-0.000724357	-0.00127462	-0.000907518	0.000644696	0.000493214	0.000152811	0.000583153	0.000949972	-0.000983692	-0.000262656	-0.000525789	0.000787493	-0.000537292	-0.000137665	-0.000616065	-0.000152901	4.43493e-05	-0.000156348	-0.000317354	-0.000116273	-7.88746e-05
	Var77	0.820592	0.562328	0.0591163	-0.080849	-0.000685959	-0.0022119	-0.0170766	-0.00154746	0.00397979	0.00234789	0.0018719	-0.000173556	-0.00168979	0.00125092	0.000583819	-0.00103778	-0.000873179	-0.00129958	-0.00076204	-0.00331408	-0.00162114	-0.00122771	-0.00105125	0.00464295	-0.00159171	0.000116726	-5.16869e-05	-0.0016229	0.000967067	-0.00190086	-0.000862822	-0.000533358	-0.00136395	0.000769776	-2.61603e-05	0.000521201	0.000184661	-0.000133698	0.000339887	-0.000463176	0.000232178	-0.00019856	-2.3008e-05	9.74314e-05	-8.08604e-05	-0.000246752	4.86145e-05	0.000128427
	Var78	0.869405	0.485542	0.0535001	-0.0723236	0.00733465	-0.00175526	-0.0113193	-0.00237327	0.00173045	0.00200377	0.000864201	0.00102071	-0.00334979	0.00266606	0.00145417	-0.0030938	0.00046638	-0.000989467	0.000303133	-0.00148143	-0.00113034	-5.14868e-05	-0.0023059	0.00310759	-0.00317074	0.00160748	0.0020622	-0.001124	0.00362141	-0.00213555	-0.00156519	-0.00107623	-0.000756234	0.000396692	-0.000224393	0.000333705	0.00066158	0.000622085	0.000237826	7.43389e-05	-0.000138398	0.000333079	0.000156128	-2.74087e-05	4.71864e-05	0.000175548	5.16068e-05	0.0002227
	Var79	0.91104	0.403752	0.0486978	-0.0647106	0.0156439	-0.00142932	-0.00798974	-0.00251223	-0.00131769	0.000872083	0.00139182	-0.000147103	-0.0043984	0.00188834	0.000372895	-0.00487637	0.00215477	-0.00224861	0.00280266	0.00108928	0.00092711	0.00131068	-0.00128999	0.000230392	-0.00349819	0.00099639	0.00358536	0.000732436	0.00284778	-0.000355987	-0.00110593	-0.000823194	0.000571955	-0.000178475	0.000585028	-0.00107842	-0.000225802	-0.000174153	-0.000151206	0.00013613	-0.000450323	0.000138662	0.000373124	-0.000390299	6.8482e-05	-5.148e-05	-9.3006e-06	-0.000199873
	Var80	0.943929	0.320744	0.0464421	-0.0566903	0.0229077	0.000221618	-0.00869387	-3.51466e-05	-0.00502991	0.00032698	0.00113807	-0.00216084	-0.00407159	0.000538506	-0.00265846	-0.00351956	0.00213399	-0.00344291	0.00463082	0.00229499	0.000336038	0.00291124	0.000711943	-0.000916146	-0.00308832	-0.00132193	0.00248777	0.00173299	-0.000537774	0.00155936	-0.000718496	0.000479349	0.000372118	-0.00112666	0.00122762	-0.000766848	-0.00118033	-0.000894264	-0.000481366	8.65295e-05	-5.33832e-05	0.000292245	0.000194368	-4.9483e-05	0.000295273	-5.07006e-05	-9.10464e-05	-0.000145445
	Var81	0.967363	0.242216	0.0447916	-0.048832	0.0298604	0.00205548	-0.0107441	0.00197837	-0.00562543	0.00152208	-0.00107065	-0.00119923	-0.00160411	0.000822851	-0.00250152	0.00138136	0.000430437	-0.00362953	0.00527288	0.00214349	-0.0030695	0.00223642	0.000397599	-0.000445514	-0.00301397	-0.00206775	-0.000302592	-0.000151574	-0.00190832	0.0012005	0.000299259	0.00170641	-0.000163322	-0.00149376	0.000499503	-0.000340949	-0.000356477	0.000406225	-0.000132429	-5.7616e-05	0.000333151	7.48637e-06	-0.000381708	0.000179401	0.000148639	0.000233221	-0.000146547	0.000453264
	Var82	0.98254	0.171519	0.0421025	-0.0427921	0.0364451	0.00130016	-0.0102233	0.00271503	-0.00345807	0.00345056	-0.00280322	0.00199323	0.000393457	0.000926396	-3.50273e-05	0.00618487	-0.00152675	-0.00144564	0.00490574	0.000438039	-0.0039145	-0.000645307	-0.00215574	-0.00152638	-0.00172738	0.000266805	-0.00211301	-0.00339766	-0.000875273	-3.72719e-05	0.00075238	0.0010718	8.27362e-05	-0.000190425	-0.000821062	-0.00106046	6.62605e-05	0.000662722	-6.67564e-05	-8.71872e-05	8.11246e-05	-0.000149301	-5.22571e-05	-0.000366643	-0.00030865	2.74194e-05	0.000250352	-2.96802e-05
	Var83	0.991566	0.109727	0.0394102	-0.036769	0.0400658	-7.68227e-05	-0.00798689	0.00320434	-0.00307277	0.00310669	-0.0029161	0.00171897	0.000864642	-0.000147259	0.000931128	0.00616177	-0.00249089	0.00453615	0.0034983	-0.000388511	-0.00203136	-0.000948939	-0.00341627	-0.00314205	0.00130271	0.00354587	-0.001659	-0.0040127	-0.000307659	0.000467822	-0.000785297	-0.000341316	0.000244605	1.91877e-05	-0.000634921	-0.000948073	-0.000423831	-0.000770561	0.000103872	-6.38599e-05	7.18784e-05	0.00036875	0.000313846	-0.000305925	0.000129914	-0.000109217	-1.18035e-05	-0.00029471
	Var84	0.996187	0.0564634	0.0387017	-0.0307667	0.0414922	0.00050081	-0.00785749	0.00355186	-0.00527777	0.00171974	-0.00215259	-0.0013345	0.00117028	-0.0013125	0.00118284	0.00188647	-0.00192331	0.0088964	0.00181904	0.000765195	-0.000453678	0.00103612	-0.000858254	-0.00163635	0.00292453	0.00504767	0.000525501	-0.00122358	0.00019049	0.00139859	-0.00225726	-0.000639901	0.000335864	-0.000684644	0.00111336	0.000207775	-0.000292358	-0.000611096	0.00047026	-6.32667e-05	-7.30199e-05	-8.7151e-05	-2.5099e-05	0.000293879	0.000145221	0.000117204	-0.000152841	0.000283027
	Var85	0.997676	0.0100604	0.0393198	-0.0263148	0.0444691	0.00176537	-0.0100391	0.00349227	-0.00931225	0.000337555	-0.000993694	-0.00223032	0.000396647	-0.00300009	0.000924921	-0.00185967	-0.0013362	0.0068363	-0.000781603	0.00270695	0.000829198	0.00134254	0.00261613	0.00158786	0.0022239	0.0038903	0.00157522	0.00207231	0.000934947	-4.98874e-05	-0.00189997	0.00046094	-4.63195e-05	-0.000443112	0.000831936	0.000408814	-0.000426651	0.000676753	-3.84096e-05	0.000116772	-8.66957e-05	-0.000619162	-0.000127037	4.95768e-06	-0.000366223	6.96015e-05	0.000228147	2.51167e-05
	Var86	0.99727	-0.0285302	0.0386873	-0.0234236	0.0468328	0.00309086	-0.0107092	0.00109176	-0.0123761	-0.00260218	0.00171129	-0.000331462	-3.66513e-05	-0.00422271	-0.00179167	-0.00301434	-0.00255307	0.00224327	-0.00365166	0.004474	0.00268485	0.000141265	0.00278756	0.00252183	0.000860333	0.000513761	-0.000398094	0.00197599	0.00035381	-0.00131053	-0.00106754	0.000796042	-0.000666732	-0.000750038	-0.00203739	-0.00040722	-0.000694679	0.000503603	-0.000170146	-7.27355e-05	0.000264703	3.63418e-05	0.000151474	-0.000273485	3.9771e-05	-0.000198805	-4.92617e-06	-0.000156144
	Var87	0.995825	-0.0616734	0.0378293	-0.0204519	0.0473558	0.00409788	-0.00808563	-0.00267654	-0.0127359	-0.00422342	0.00422591	0.000327024	0.00209721	-0.00386108	-0.00514884	-0.0021308	-0.00414585	-0.000205096	-0.00365165	0.00422534	0.00463821	-0.000690022	-5.51694e-06	0.00236184	0.000269606	-0.00297799	-0.00235281	-0.00144984	0.000391511	0.00017173	-0.000498576	-3.52675e-05	0.000223914	-0.000542429	-0.00210636	-0.000774171	-1.39662e-05	-0.000593796	0.000173006	-5.18387e-05	-6.82317e-05	0.000398707	0.000379457	0.000346389	0.000162949	7.6256e-05	-0.000176645	0.000203379
	Var88	0.993431	-0.0933057	0.0382209	-0.0157546	0.0480919	0.00351923	-0.00539222	-0.00386513	-0.0121859	-0.00167912	0.00231176	-0.0030404	0.00440936	-0.00250868	-0.00536719	0.000779683	-0.00340418	5.49723e-06	-0.00167534	0.0018076	0.00504742	-0.00109183	-0.00347783	0.00262376	0.000416089	-0.00323492	-0.00218673	-0.00177877	0.00139855	0.0012766	0.000750903	-0.000400312	0.000620445	0.000273263	0.00165593	-0.000252728	0.000733869	-0.000186806	-0.00016381	0.000356713	-0.000123822	3.63699e-05	0.000221542	5.01595e-05	-4.02949e-05	0.000306795	5.85062e-05	-8.22095e-05
	Var89	0.990417	-0.12262	0.0375418	-0.0103278	0.0471596	0.00281454	-0.00544292	-0.00181456	-0.0106663	0.000788636	-0.0007449	-0.00612911	0.00372541	-0.000370515	-0.00301606	0.0039827	-0.00122392	0.000740731	-0.00170523	-0.000432942	0.00285535	-0.000333315	-0.00491397	0.00115641	-0.00110354	0.00089872	-0.00216879	0.00233127	-0.0001384	0.000498734	0.00225313	-0.000543196	-0.00119691	6.1645e-05	0.00266415	9.48315e-05	0.000468626	0.000696597	-0.000203535	2.91069e-06	0.000395113	-8.49957e-05	-5.92713e-05	-0.000398356	0.000195769	-2.6457e-05	3.59201e-05	-3.1967e-05
	Var90	0.987196	-0.147741	0.0360567	-0.00563679	0.0448587	0.00477708	-0.00572404	0.00089543	-0.00877641	-0.000985834	-0.000145149	-0.00491268	0.00147417	0.00114882	-0.000580903	0.00422037	-0.000165131	0.00054183	-0.00275218	-0.00153415	-6.26551e-05	0.00217956	-0.00416787	-0.000591118	-0.00364247	0.00392729	-0.00107946	0.00416223	-0.00244375	-0.000761556	0.00184298	7.44813e-05	-0.00108501	0.000272497	-0.000726978	-2.28059e-05	7.10498e-05	-2.96248e-05	0.000102258	-0.00020321	5.30877e-05	0.000134071	-0.000221214	0.000290464	4.29126e-05	-0.00020103	8.38471e-05	0.000110303
	Var91	0.984137	-0.166763	0.0379375	-0.00151159	0.0443601	0.0082581	-0.00383019	0.001601	-0.00824305	-0.00280382	0.00179053	-0.00227707	0.000602181	0.000477337	0.00214177	0.00136408	2.44195e-05	-0.000256643	-0.00295534	-0.00152242	-0.00188641	0.00379819	-0.00443973	-0.000255654	-0.00219613	0.00107408	0.00221645	0.00156348	-0.00223639	-0.00114185	-0.000368575	0.00152587	0.00107987	0.000947539	-0.00174736	0.000510629	0.000885274	-0.000902442	4.6729e-05	0.000179421	-0.000636485	0.000101241	-0.000254205	5.3621e-05	-0.000164531	4.78326e-05	4.25879e-05	-0.000150147
	Var92	0.981177	-0.181981	0.0430703	-0.000248002	0.0447814	0.00922904	-0.00235969	0.00182908	-0.00940027	-0.00221942	0.00177011	-0.000455883	0.00148834	0.000171548	0.00489497	-0.00137556	0.00151341	-0.0014489	-0.00292617	8.51649e-05	-0.00315864	0.00346901	-0.00428882	0.00017078	0.00300068	-0.00292618	0.00351364	-0.00132726	-0.00117175	-0.000246628	-0.00110514	0.00190341	0.000415213	0.000356222	0.000453164	0.000886987	0.00108976	-0.000447264	-7.67631e-05	0.000210089	-8.65837e-05	-0.000411281	4.57806e-05	-0.000250332	6.58167e-05	0.000131862	-0.000316612	-1.00098e-06
	Var93	0.97772	-0.198898	0.0459807	-0.00276715	0.0452478	0.00636822	-0.00381318	0.00314144	-0.011049	-0.00213994	-0.00014878	0.000999384	0.00329258	0.00190058	0.00589706	-0.00226248	0.00301007	-0.00358642	-0.00149648	1.96025e-05	-0.00223099	0.00208019	-0.000434015	0.000655326	0.0058452	-0.0026442	0.00198881	-0.00142254	-0.0010321	0.000585139	-0.000347439	0.000628528	-0.00130961	-0.000118328	0.000723891	0.000215995	-0.000390164	0.000417811	4.93656e-05	-0.000171962	0.000556372	-0.000270404	9.39529e-05	-1.69258e-05	7.05306e-05	-0.000172813	0.000106715	-3.27816e-05
	Var94	0.973629	-0.217688	0.0451211	-0.0026633	0.0475735	0.00223953	-0.00595659	0.0046638	-0.0116307	-0.00143954	-0.00172971	0.000911432	0.00449394	0.003476	0.00507567	-0.00251046	0.00156178	-0.00493543	0.00125433	-0.00360712	0.000399688	0.000577951	0.0043351	0.00179372	0.0037064	0.000174939	-0.00054725	-0.00017779	-0.00113987	0.000615325	4.44161e-05	-0.000869228	-0.000979486	0.000768203	-0.000408497	-0.000407444	-0.000991716	0.000250652	-0.000155812	-0.000286442	-0.00031836	0.000549396	-0.000293783	-0.000191728	-0.000195015	-3.65329e-05	0.000313269	-4.2103e-05
	Var95	0.970029	-0.232864	0.0449263	0.00198649	0.0493993	0.00116581	-0.00607667	0.00601684	-0.0110615	0.00147234	-0.00181704	0.000397238	0.00382157	0.00357259	0.00366029	-0.00303855	-0.000937186	-0.00422163	0.00259964	-0.00507297	0.00047505	-0.000277388	0.00624356	0.000528182	-0.000351836	0.00198394	-0.00216211	-0.000282601	-0.000776563	-0.000302135	-4.14997e-05	-0.00113921	0.000250869	0.000905934	-0.000234426	-0.000286817	0.000439523	7.86983e-05	-0.000593641	0.000285098	-0.000432979	0.000411128	8.14937e-05	0.000146201	-0.000119232	0.000325831	-0.00029222	3.74569e-05
	Var96	0.967876	-0.24173	0.0464886	0.00509407	0.0478668	0.00317578	-0.00570095	0.00547308	-0.0102892	0.00353033	-0.00103441	0.00154939	0.00165929	0.00166556	0.00220555	-0.00338201	-0.00190221	-0.00410011	0.00129891	-0.00174736	-0.000703106	-0.00186599	0.00587805	-0.00222093	-0.00248607	0.00205271	-0.00161601	-0.000673363	-0.000122989	-0.00124521	1.50455e-05	4.59565e-05	0.000892936	-0.000615479	0.000412309	0.000709237	0.0013543	0.000223992	-6.74612e-05	0.000388565	0.000526932	-0.000425081	0.000393832	0.000291416	0.000193953	-4.86052e-05	-9.61757e-05	-0.000279813
	Var97	0.966175	-0.24875	0.0472128	0.00534694	0.0460339	0.00351178	-0.00638777	0.00295348	-0.00988838	0.00303548	-0.000592787	0.00216949	-0.000194155	-0.00207998	0.000366137	-0.00241072	-0.00153837	-0.00323607	-0.000339955	4.39976e-05	-0.000952737	-0.00398211	0.00357808	-0.00346035	-0.00177581	7.94452e-05	-0.000399589	0.000574715	0.00136264	-0.000429835	0.00119909	0.000944256	0.000715612	-0.000761015	0.000254049	0.00162427	-8.18219e-05	-0.000422063	0.00071729	-0.000447708	-0.000136889	-0.000518697	-1.11708e-05	-0.000168734	0.000239922	-0.000228073	8.04179e-05	-5.2335e-06
	Var98	0.964042	-0.256928	0.0471753	0.00539194	0.0461149	0.00220209	-0.00588169	0.00138905	-0.00897317	0.00276653	-0.000442653	0.00138431	-0.000241936	-0.00424363	-0.00105288	-0.000157826	-0.000610874	0.00126041	-0.000394027	-0.00302154	-0.00155803	-0.00461137	-0.000180893	-0.00377167	0.000300273	-0.00271591	0.00113662	0.00197134	0.00276172	0.00107566	0.00177663	-0.000197058	0.000713339	0.00116673	-0.000522257	0.000667933	-0.0011281	-0.000480368	0.000408508	-0.00060426	-0.000452104	7.58992e-05	4.8116e-05	-0.000297259	-0.000300101	0.000110621	-0.000130078	0.000419919
	Var99	0.961878	-0.264475	0.0480921	0.00502998	0.0477822	0.00243292	-0.00407912	0.0022358	-0.00669212	0.00267226	-0.000642674	0.00181	0.000645632	-0.0037215	-0.00124402	0.00156791	0.00051444	0.00494502	8.96616e-05	-0.00539526	-0.00220004	-0.00433032	-0.00129251	-0.00220586	0.00063725	-0.00332623	0.00299268	0.0016585	0.00211668	0.000705373	-0.000158733	-0.0017104	0.00103105	0.00132268	-0.000314715	-0.00129845	0.000530486	0.000598754	-0.000625644	0.000306438	0.000687143	0.000279304	-0.000339162	0.000372891	-8.88738e-06	-0.000166965	0.000121093	-0.000346006
	Contribution of the variables (%):
		F1	F2	F3	F4	F5	F6	F7	F8	F9	F10	F11	F12	F13	F14	F15	F16	F17	F18	F19	F20	F21	F22	F23	F24	F25	F26	F27	F28	F29	F30	F31	F32	F33	F34	F35	F36	F37	F38	F39	F40	F41	F42	F43	F44	F45	F46	F47	F48
	Var1	1.22889	0.0105199	0.140619	0.467355	0.367799	92.8925	0.709179	0.629682	1.89679	0.000723812	0.00535151	0.672258	0.12271	0.00595729	0.00813499	0.0440728	0.0843058	0.000489295	0.000446965	0.00472055	0.0905093	0.0328103	0.105123	0.00265142	0.00107866	0.0456388	0.109084	0.0404808	0.0270832	0.0318098	0.0120665	0.00931201	0.000332634	0.000663374	0.0197399	0.0577716	0.0018536	0.00416105	1.1261e-06	0.000337788	0.00112137	0.000859989	0.00345714	0.000959632	0.0167135	0.0230257	0.000358458	9.1146e-05
	Var2	1.04343	0.991521	0.0311768	0.0108245	1.04065	0.0592354	0.706752	0.287642	0.0376267	1.85565	5.88727	1.81867	0.302923	8.527	2.3863	0.139309	15.9378	1.6352	0.0273621	5.2336	1.17234	0.130258	0.354359	0.358003	3.26601	0.301568	0.565164	0.0030269	2.08081	1.50264	0.782647	0.557237	0.529792	11.5143	0.468014	1.71223	0.171542	1.12393	0.00373641	0.0631391	0.845569	3.08217	3.84148	0.983764	0.286326	0.116787	0.771867	2.40703
	Var3	1.05356	0.94655	0.0292025	0.00336865	0.891753	0.00573953	1.15	0.19276	0.0764827	0.963083	12.0639	0.316252	0.452907	12.97	0.904461	0.00489932	2.25032	0.582724	0.0539028	0.952961	0.741398	3.48879	0.0746374	0.838162	1.37275	0.902487	0.0139161	0.0165152	0.439917	0.0901258	5.03965	1.49381	0.0754067	6.40178	0.267511	0.0241726	0.138426	2.12636	2.71862	0.0522762	0.360651	0.0130157	3.71536	0.569557	0.215666	0.568667	1.83993	0.962313
	Var4	1.06447	0.896275	0.0285865	0.00319145	0.836861	0.0027484	1.37792	1.21734	0.220872	0.596817	13.1325	0.242356	4.73836	5.70533	0.0293642	3.00902	4.61455	0.0404678	0.00513098	0.798042	1.03055	2.44238	0.160514	0.397465	1.58266	0.00781597	0.131774	0.130185	0.11048	1.45902	0.0316277	2.57113	0.191651	2.22193	0.671644	1.50935	0.000899715	0.00315389	3.64739	1.2227	0.00415745	1.52231	0.483146	0.497834	1.87704	0.148926	0.382066	0.151814
	Var5	1.0792	0.828764	0.0215862	0.012248	0.867643	0.0566586	0.847185	6.38058	0.22604	0.390592	2.95831	0.777599	2.34131	0.0523306	1.83086	13.143	5.20559	0.615894	0.387294	1.56592	1.52727	1.92985	0.697403	0.0441989	0.0145727	1.63733	0.0922186	0.694436	0.011412	0.0313156	5.68453	0.102011	0.468236	0.703749	0.00442588	0.179759	2.27129	0.69516	0.0273298	0.00120231	0.433942	0.0217914	0.049731	2.34219	3.03009	1.77182	0.0301968	0.140181
	Var6	1.10045	0.730525	0.015927	0.0174043	0.908283	0.126785	0.229899	9.91323	0.368805	0.569659	0.391015	0.17992	1.95547	0.918739	4.03113	9.28076	2.08929	1.26534	0.0587788	0.933347	2.54627e-08	7.95494	2.78903	0.520116	0.0182916	0.00542972	0.000600414	0.0512139	0.644117	0.667239	0.879675	4.29318	0.810956	0.117132	0.157208	0.619188	0.0918944	0.169399	4.89273	0.147998	0.0895768	2.4672	0.0155386	0.121919	1.26781	1.69951	1.61735	0.461633
	Var7	1.12227	0.628702	0.0139825	0.011985	1.02673	0.0217571	0.112778	5.94702	1.60617	1.30974	1.95402	1.41956	11.5445	0.0661825	3.18892	0.240526	10.6529	0.0615403	0.764034	0.600936	0.0380941	0.412783	2.12343	0.105743	0.1685	1.35477	1.24279	0.399736	0.418054	0.696883	0.743287	0.194753	0.471453	2.27252	0.00189365	0.138285	1.0586	0.695996	0.530264	1.15901	0.0587953	0.795939	0.296756	1.24298	1.44408	1.88317	0.771057	2.44723
	Var8	1.14265	0.532434	0.0132683	0.00423139	1.24311	0.00690023	0.480207	2.69179	3.81423	1.33238	0.304436	6.46291	7.03847	0.0130714	1.35207	2.85081	1.49594	0.086245	2.54214	0.1834	2.00256	3.76637	0.133338	0.919909	5.55295e-07	0.103743	0.0654187	1.1375	0.00356739	2.41524	0.110582	4.5192	1.80471	0.818019	0.0017384	0.488813	2.08219	0.557847	0.299421	0.0540845	0.0653246	2.2589	0.221375	3.41637	3.80627	0.0686204	0.315707	0.459835
	Var9	1.16818	0.411366	0.015583	0.000263752	1.46234	0.0150323	1.73249	2.17352	3.26178	0.300973	0.795403	5.71531	0.120516	1.67525	0.0459065	7.69446	1.96489	0.0526648	0.227921	4.32743	6.77309	1.50181	0.204764	1.81407	0.964486	0.0241388	0.843232	0.307178	0.181117	0.246703	1.45034	0.680346	1.43608	1.25951	0.00927345	0.542255	4.93562e-05	0.257867	0.530938	1.87642	0.0835586	0.4514	0.668168	0.484332	1.38888	5.86703	0.0186129	2.64016
	Var10	1.19683	0.275444	0.0180927	0.00933933	1.65854	0.0052303	2.97869	2.15731	1.7657	0.141938	2.65884	0.633605	1.57773	9.72269	2.80346	4.41786	3.17967	0.026737	1.90501	1.88603	0.554881	2.00561	0.798182	0.186051	0.0271807	0.0195518	0.0325353	0.00111449	1.34035	1.10406	2.15461	5.57735	0.504726	0.131558	0.000855449	0.386034	4.43039	0.301582	0.499539	0.255194	0.180926	0.0463537	0.0967429	1.22428	1.07872	2.65043	1.2046	3.79734
	Var11	1.22359	0.148618	0.0147015	0.0232782	1.94998	0.0528732	2.74597	1.48932	1.70632	0.341694	0.27879	1.7625	0.827386	10.3357	11.627	0.518855	0.0892246	1.21618	0.915365	1.8907	6.00321	2.48305	0.0546391	0.128908	0.0262934	0.0729967	0.500523	0.688878	0.218262	1.07327	5.75204	0.663158	0.028095	0.279042	0.0816854	0.887085	0.341093	0.080631	1.57307	0.0236549	1.43866	0.415771	0.362852	2.51942	0.292972	0.428663	0.516222	0.0769308
	Var12	1.24522	0.0458954	0.0142124	0.0214695	2.19518	0.326133	1.60356	0.585725	2.78454	0.0286517	4.35857	8.05085	0.111978	0.523105	8.60376	0.00298034	0.00255078	0.0136514	0.514628	2.9111	9.27097	0.273773	1.76695	0.0377642	1.80121	0.0333162	0.569133	0.0920543	0.371569	0.0643515	1.52927	6.1492	0.45333	0.141622	0.503742	0.182971	0.576512	0.0152484	0.579751	1.02466	0.0316405	0.110971	3.15978	0.3176	0.049704	4.07294	0.0421492	0.425741
	Var13	1.25494	0.000268109	0.0348343	0.00275516	2.05363	0.239604	0.624583	0.0573467	5.58819	0.00254262	10.441	7.96609	1.03735	3.29914	0.453743	0.0169518	3.87688	3.33695	1.32212	0.934827	0.421831	1.27581	1.40936	0.146415	0.0505774	0.075576	0.433412	3.38646	0.0555866	2.67151	2.81798	0.140816	0.111205	0.618558	0.000104311	0.049136	0.478547	0.254238	0.995678	0.462157	1.07101	0.643581	0.197979	1.37616	0.110804	2.24436	0.328442	1.6768
	Var14	1.24645	0.03722	0.0997965	0.0019962	1.64388	0.000483113	0.262681	4.2355	6.51635	0.851579	3.13921	1.41844	0.670842	4.97794	1.3357	0.108314	9.8157	1.17975	0.382944	4.86875	0.826009	0.960427	0.0101841	0.639928	1.34858	0.344287	2.44242	0.59458	0.0878549	0.488178	2.85904	0.576473	0.0777046	0.529379	0.293836	1.03054	0.0724391	0.133663	3.01238	0.127133	0.62165	0.0813364	1.1683	1.8058	0.582476	0.59948	0.300294	0.311501
	Var15	1.21782	0.157739	0.224255	0.0128868	1.24007	0.186721	0.59197	11.7968	3.29808	4.55515	0.078264	1.72863	0.0166998	1.65101	2.73244	0.17521	1.99418	1.14012	0.0887747	0.00836881	1.40845	5.97567	0.81566	0.421425	0.0833578	0.424296	1.78455	1.75611	0.000642722	0.58526	3.43919	0.344124	3.56135	3.19968	0.119047	0.516073	1.48918	0.0338933	0.159927	0.609552	0.265099	0.944425	3.74467	0.507162	0.000872171	1.04979	0.00335881	0.0986951
	Var16	1.17282	0.339225	0.456347	0.0692403	0.902114	0.177874	1.66463	13.9547	2.28927	2.96393	0.0899738	7.65299	0.861094	0.0523492	0.701571	0.0829229	1.19638	1.94824	0.266922	5.10415	5.14459	0.507447	0.146427	0.206688	0.170379	4.67813	1.43258	0.017856	0.207336	0.91201	1.68309	0.107314	0.102689	0.631261	0.0725079	1.05611	0.237905	0.0116521	0.35405	0.38771	0.0368545	1.6431	0.925299	2.76265	0.024065	1.75453	0.147847	0.0610431
	Var17	1.11504	0.558647	0.857394	0.311742	0.604071	0.0254713	1.96489	12.6295	2.11581	0.0462032	0.420032	1.11794	0.285249	4.43888	0.133716	1.49318	4.84318	0.891004	0.0575737	1.17236	1.02451	1.19176	0.602313	0.141883	0.603981	0.210276	2.77525	1.7402	0.0150662	0.0033675	3.26533	1.01839	1.43549	2.81308	0.656111	0.947517	2.63269	0.0772814	2.23216	0.160028	1.24299	0.389257	1.45071	0.0986587	0.0459859	0.650895	0.163837	0.0130714
	Var18	1.04445	0.805343	1.46419	0.867693	0.374494	0.0109687	1.43101	6.37228	0.421107	4.38124	0.660764	3.4266	0.0978881	7.50351	0.0264683	3.51377	4.91462	2.51096	0.00370808	4.45097	5.02411	2.06699	0.039872	3.18419	0.107793	1.66614	0.0333819	0.412281	0.10617	0.0195362	0.194979	0.139162	0.320015	0.289134	0.857962	0.024659	0.292748	0.53001	0.411868	0.110375	0.00692802	2.7877	0.825725	0.713204	1.01817	0.540705	0.052341	0.00352518
	Var19	0.948277	1.12777	2.39222	1.57505	0.232257	0.025278	1.22426	0.361692	0.00187196	11.4618	0.596298	5.17501	0.195911	0.434994	7.23618	0.527235	0.974836	0.475472	0.876556	1.92082	0.386695	1.73939	1.22078	0.680704	1.46385	0.864965	2.21063	1.93427	0.433509	0.0506198	0.266192	1.09458	0.00433224	1.01682	0.268102	1.91795	0.0246726	0.705505	1.35644	0.0870543	0.0919359	0.258926	0.0105169	1.15833	1.01479	0.423732	0.136257	0.344541
	Var20	0.785307	1.66625	4.04164	2.48435	0.129633	0.0122405	1.03242	1.04525	0.000303811	17.7421	0.116323	0.0182327	0.10631	3.58387	9.26851	2.55775	0.293041	0.470375	0.0715111	5.27582	1.88816	0.0595928	0.0230165	2.63594	8.52483e-06	0.100239	0.691695	1.8154	0.945585	0.0646751	0.106636	0.272127	0.332877	0.0197547	0.563935	0.199388	1.47757	0.110925	0.196168	0.690475	0.828563	1.38446	0.0734534	0.494183	0.030724	3.17166e-05	0.000281988	0.35409
	Var21	0.462634	2.68319	7.69021	4.5419	0.0227843	0.0154999	0.518509	2.70973	0.0148408	9.56697	0.904941	7.26961	2.24212	4.15687	0.710359	1.22768	0.0670163	1.25213	0.183203	1.44329	0.304205	0.754743	0.567664	0.868483	1.82784	0.246936	2.01663	0.781849	0.853258	0.0571534	0.000980708	1.27341	1.83256	0.250248	0.0843875	0.690065	3.79915	0.143111	1.29391	0.105284	2.81796	0.0564488	0.0183216	0.476347	1.75851	9.02769e-06	0.202814	8.91052e-06
	Var22	0.0115753	3.89507	14.4422	7.8793	0.0480928	0.0156201	0.0208335	2.81472	0.883807	3.3129	6.27075	5.24495	4.9825	0.144203	7.00966	4.40034	0.293646	0.147335	0.225747	7.17763	0.0056057	0.00197996	0.827713	1.20412	0.0853553	0.247257	0.444144	0.0467781	0.662117	0.177079	0.0927225	0.295524	0.812194	0.0842656	0.116096	0.610495	0.481765	0.392847	0.857943	0.0570252	0.331075	0.327303	0.00849121	0.322678	1.52968	0.0367458	0.316571	0.258027
	Var23	0.478808	2.1517	11.4172	4.98059	0.125469	0.00329497	0.0412147	0.945221	2.02253	20.3899	0.874856	5.71437	0.943518	1.18214	1.4209	0.66302	0.00474478	0.455225	0.00242089	0.0472129	0.17094	1.66739	0.0101522	0.00789123	0.00730861	0.180444	3.18232	0.203099	4.1358	1.23666e-05	0.0437906	0.0513151	3.41238	0.70761	0.176072	0.169265	0.97508	0.323326	0.300143	0.704389	0.504165	0.00368525	0.518547	0.0427649	1.56997	0.124232	0.28355	0.000795588
	Var24	0.988307	0.635572	5.01112	1.42415	0.071388	0.00623033	0.0155179	0.0870216	0.0354076	5.19089	1.41077	6.44167	2.13237	0.903696	2.23535	10.0051	0.0273755	0.0900012	1.57791	3.25652	1.10779	0.206398	4.55132	0.746031	0.502491	0.595115	2.06935	1.37255	0.810289	0.202841	0.0395893	0.612066	0.194203	0.01017	0.375079	0.00431991	1.7111	0.0898585	0.413836	2.63873	1.85423	0.107439	0.0251862	0.382797	0.941254	1.15109	0.171149	0.250529
	Var25	1.14824	0.218787	2.49493	0.411482	0.052242	0.00317436	0.0054842	9.53732e-05	0.135015	0.299586	4.28967	0.257542	7.73655	0.0408617	0.0563107	2.01245	0.184115	0.0315799	3.71955	0.286622	0.555374	2.91644	2.82558	1.27201	0.306969	0.0691842	5.23947	0.979568	2.22435	0.359986	0.0663318	1.62867	4.32047	0.0469538	0.179757	1.2632	0.0298822	0.117335	3.1634	0.00304144	1.09335	0.0105615	0.0190163	1.32198	0.263689	2.32518	2.95701	0.481675
	Var26	1.20181	0.0953294	1.50552	0.143238	0.0328416	0.00115067	0.000382968	0.0524354	0.0844681	0.00648676	4.4452	0.662373	7.42969	0.000944595	0.907655	0.230623	0.875791	0.00769135	3.08704	0.30265	0.047463	0.936533	0.0763865	0.0520433	0.0537572	0.0163393	0.107178	0.276132	4.17304	0.874344	0.21547	4.87592	1.16332	0.0468357	0.942023	0.0235328	1.38414	0.0525805	0.0612842	2.19661	0.831502	0.00557918	0.188364	1.07286	4.96832	1.59483	4.02396	0.270086
	Var27	1.22401	0.0499912	1.04814	0.0476878	0.0129149	0.00304735	0.0186378	0.0976478	0.0207179	0.00147701	2.42275	1.32799	4.63416	0.0725196	0.716643	1.17976	1.48198	0.896979	0.627471	0.555897	0.910936	0.202848	1.43748	0.255485	0.116121	0.00551812	1.23473	0.203753	0.597817	0.00768276	0.361865	1.53601	0.000241257	0.629069	0.0232634	2.29474	0.930244	0.087946	6.67872	0.0709887	0.756806	0.506628	1.55569	1.52405	1.3493	2.60954	7.37767	0.121368
	Var28	1.23481	0.0300895	0.808147	0.0127541	0.000726479	0.00638757	0.031093	0.056151	0.00123469	0.00094821	1.12177	0.821558	2.57811	0.0810351	0.617479	1.08944	1.81664	1.24665	0.000294766	0.153717	1.86911	1.38213	0.469774	0.456917	0.519174	0.0565185	1.89987	0.520429	0.25578	0.895186	0.766461	0.0305346	0.384378	0.494891	0.199395	2.90757	0.312504	0.346659	1.34869	0.887904	2.15926	0.852557	2.45896	0.12029	0.552432	2.01092	4.74073	0.0799414
	Var29	1.24083	0.0197214	0.666	0.000957216	0.0102025	0.00231676	0.0167059	0.0326635	0.000324342	0.00993414	0.672526	0.37964	1.35112	0.000604561	0.490347	0.944599	1.51644	0.686222	0.000172258	0.000598131	1.99611	1.05549	0.00726254	0.519438	0.201098	0.0417816	1.59425	0.461881	1.24809	1.39584	2.71531	0.513034	0.848663	0.109994	0.151427	0.265893	1.19407	0.266452	0.934129	0.741423	0.963321	0.0352795	0.0530909	0.166738	1.38774	0.0289888	6.85073	0.165927
	Var30	1.24446	0.0131699	0.575713	0.0035867	0.0766121	0.000657182	0.00655068	0.0273243	0.000570373	0.0213485	0.395112	0.228292	0.602238	0.0140874	0.158713	0.752443	0.552248	0.549843	0.00522529	0.00209894	1.24544	0.423764	0.119055	0.967195	0.0235846	0.00497356	1.01252	0.0348365	0.941445	1.74561	2.84934	0.0767004	0.23688	0.00436868	0.21867	0.000522137	0.0514865	0.254531	0.955621	0.0228884	0.39781	1.09709	2.93857	0.0763858	1.0287	0.00976781	0.502988	1.89702
	Var31	1.24663	0.00831673	0.515085	0.0288001	0.226796	0.00714092	0.00391814	0.0269059	0.000789122	0.004246	0.161256	0.0719447	0.212436	0.00034161	0.00689643	0.324284	0.0400589	0.418672	0.00809436	0.12338	0.40086	0.111242	0.0374519	1.29493	0.214002	0.00404994	0.168558	3.02034e-05	0.214134	1.98201	0.573515	0.136467	0.127111	0.000677729	0.66787	0.0970313	0.194933	0.404846	0.0769822	1.081	0.646446	2.43416	3.72933	0.193023	2.34193	0.000485939	1.58829	5.58258
	Var32	1.2477	0.00467938	0.471718	0.0876326	0.461878	0.0298818	0.00152261	0.0408439	0.00469499	0.00761595	0.037886	0.00370892	0.056921	0.00091117	0.00048125	0.0440626	0.0295285	0.045375	0.136328	0.33979	0.0363653	0.000295825	0.00110216	0.835592	0.0761883	0.0363811	0.0740856	0.00585295	0.067577	1.61595	0.00442622	0.387096	0.45531	0.00872849	1.36046	0.235106	0.000115755	0.0883494	0.0329906	4.55615	0.0284097	0.784878	0.689358	0.0201535	6.65223	2.27862	0.0958086	0.00908411
	Var33	1.24771	0.00222578	0.444471	0.185129	0.768892	0.0497791	0.000668345	0.074244	0.0191094	0.0372724	0.00563067	0.144509	0.00358144	0.0116112	0.00169603	0.000693566	0.129685	0.050643	0.631733	0.425923	0.0157294	0.125172	0.0374502	0.6608	0.0766218	0.109776	0.662102	0.0065218	0.0306418	0.659209	0.0128468	0.347094	0.00837065	0.256579	1.41093	0.061741	1.5447	0.0538126	0.00741083	0.536623	2.47242	0.00351373	0.422469	0.028662	4.71269	3.19393	0.806318	4.04064
	Var34	1.24698	0.000824336	0.429928	0.314335	1.09587	0.0556252	0.00134368	0.0972041	0.0583787	0.0425193	0.000244406	0.361428	0.0170518	0.0537406	0.00950567	0.0379386	0.13359	0.0696917	1.49107	0.402936	0.077729	0.383949	0.06472	0.982205	0.677751	0.133797	1.25785	0.191154	0.0572189	0.160265	0.0163427	0.240522	0.882025	0.879451	0.372985	0.136752	4.41393	0.0294151	0.675231	6.59516	4.90279	0.31436	0.382361	0.0829265	0.39554	0.869295	0.000433686	0.421847
	Var35	1.24607	0.000175613	0.421326	0.443235	1.37851	0.0439598	0.00322498	0.0828594	0.138841	0.0389842	0.000114886	0.391321	0.0727496	0.0377541	0.00218352	0.0711823	0.0602587	0.000572262	1.68782	0.288613	0.136983	0.582716	0.0510846	0.712645	0.970149	0.108854	0.997123	0.956072	0.671103	0.163233	0.0054493	0.0130302	1.2792	1.26753	0.00552704	1.19884	3.1506	0.677546	0.728267	12.476	0.0664319	0.386859	0.57354	0.0294125	0.061126	0.011624	1.34291	0.522414
	Var36	1.24529	7.35882e-07	0.419647	0.533212	1.57296	0.0242368	0.00987132	0.0635829	0.190608	0.0700446	0.000235544	0.17056	0.0940436	0.000891672	0.0133889	0.00753443	0.0161994	0.0395183	1.09586	0.183574	0.216628	0.450572	0.00251466	0.0980255	0.797263	0.0841209	0.559367	2.00183	1.15142	0.164551	0.200921	0.381953	0.000842502	0.382025	0.0525875	2.12304	0.305857	4.15333	0.0134144	2.39063	6.21765	0.0055365	2.78698	0.225866	0.00846863	0.0249411	1.57095	0.0482324
	Var37	1.24474	5.49248e-05	0.42615	0.587623	1.63141	0.0153197	0.034864	0.0669209	0.176886	0.156136	0.00695477	0.0295073	0.0710199	0.0267666	0.0663975	0.0111496	0.0518184	0.0810287	0.484938	0.0663492	0.227641	0.249003	0.181733	0.00298998	0.682746	0.0108505	0.443302	1.20438	1.12726	0.0138718	0.248412	1.43533	0.472815	0.900695	0.0113134	1.02854	0.100453	1.31603	0.425566	1.65054	9.19419	0.263634	2.45566	0.491192	0.820201	1.30331	0.00834122	0.0569413
	Var38	1.24469	0.000123027	0.433947	0.610022	1.5237	0.0189194	0.0918087	0.0754912	0.188275	0.2005	0.0380624	0.0459298	0.0173437	0.0965976	0.0918096	0.00588184	0.16348	0.118671	0.302867	0.0130455	0.19549	0.480244	0.877495	0.00514561	0.467611	0.0153769	0.0440128	0.0604937	0.820007	0.0128646	0.0107702	1.59329	0.00552573	5.66828	0.292209	2.84722e-05	0.0986073	1.73488	1.30344	8.66475	0.967147	0.0411883	1.26005	0.177567	2.28579	0.0091471	0.153157	0.0488671
	Var39	1.24542	0.000110062	0.433177	0.564688	1.32216	0.0267769	0.135835	0.0829033	0.17947	0.0949538	0.123401	0.151592	0.000144395	0.0284286	0.0149697	0.000209929	0.0595958	0.119504	0.461003	0.122349	0.0964145	1.01941	0.664588	0.239455	0.266294	0.330571	0.46471	0.0223558	0.0145975	0.128746	0.0114368	0.97519	0.0070529	7.56678	1.38795	0.00861804	0.6278	6.16764	0.344697	0.796766	0.48357	0.0152466	0.000164419	0.499827	0.656541	3.10427	1.50128	0.475091
	Var40	1.24663	4.47761e-05	0.422965	0.459701	1.13359	0.0347365	0.12042	0.0902287	0.0397001	0.0129108	0.248659	0.0868205	0.00976556	0.0270046	0.0168504	0.0296577	0.00215837	0.0325641	0.767941	0.0841504	0.0563662	0.479736	0.00122031	0.321611	0.510194	0.54555	0.805031	0.00226226	0.786345	2.04025	0.0514792	0.186495	0.0575308	3.28848	0.134384	0.94539	0.628176	3.86832	9.98111	1.77722	0.0168413	7.2187	0.476281	0.00014867	0.00108841	0.0103422	0.95999	2.0334
	Var41	1.24787	1.06384e-06	0.408581	0.352559	0.961303	0.0503287	0.125166	0.094462	0.00202465	0.0109537	0.29054	0.00155569	0.0151018	0.49251	0.0118939	0.112041	0.00211542	0.985924	1.0506	0.26414	0.0224793	0.0051373	1.13576	0.0084623	1.2572	0.0310796	0.00891486	0.0231073	0.721419	9.06681	0.871868	0.0594987	0.155816	0.0301945	1.56253	0.787005	3.1885	0.120104	5.60096	0.424302	0.157477	9.84844	0.0504664	1.28865	0.546676	1.09217	2.8889	0.481095
	Var42	1.24928	0.000210151	0.381853	0.275209	0.780257	0.0585962	0.180046	0.115098	3.22949e-06	0.0164492	0.151379	0.10177	0.00257556	0.78524	0.00299143	0.0857023	0.0392852	0.905724	0.995825	1.2015	0.0103949	0.0136062	2.66536	0.818082	0.746946	0.170635	0.169103	0.000101832	0.183221	10.3871	1.35886	0.62502	2.59303	0.526045	1.93072	0.76672	0.880443	1.48171	0.110303	2.40941	1.42243	0.0126543	0.753307	1.25448	0.404724	0.0570733	0.221557	0.289746
	Var43	1.25094	0.00109346	0.337719	0.239657	0.574926	0.0487976	0.170875	0.0924076	0.000189486	0.00285539	0.0183241	0.145906	0.100522	0.0721117	0.0304649	0.00536706	0.000485752	0.10971	0.907937	2.24746	0.71476	0.0249821	1.16034	0.906667	0.179735	0.279994	0.0283369	0.00351118	1.76884	5.73521	0.120076	2.1971	2.42454	0.17774	0.00438223	3.84699	0.0493926	2.00326	3.78509	0.918611	0.052355	2.25101	0.549921	3.38468	0.429232	0.183977	1.91196	0.0331883
	Var44	1.2521	0.00359829	0.293049	0.228588	0.390555	0.0425275	0.131016	0.0264012	0.0345734	0.00293343	0.00378929	0.132945	0.203966	0.0603395	0.0530716	0.0438414	0.00806708	0.0548941	0.754451	2.06921	1.49827	0.0778894	0.0274857	0.758601	0.27935	0.558357	0.612161	0.00165684	1.03051	3.39281	4.10604	4.36121	0.0534972	0.41289	2.79976	2.05122	0.153211	0.514276	1.80095	2.31257	3.44771	3.41749	3.39084	1.93199	0.61491	0.594931	1.46364	0.0610138
	Var45	1.2521	0.00881385	0.262227	0.205132	0.30851	0.0402051	0.126419	0.00665421	0.0479659	0.044114	0.00608466	0.155512	0.031407	0.0934954	0.062607	0.136928	0.0351834	0.00692248	0.449433	1.08953	0.352385	0.107219	0.00175772	1.15004	0.10336	1.22893	0.582624	0.0143856	0.0228942	0.950007	2.37239	2.05615	0.00161523	0.659311	1.37772	0.00473724	0.617523	0.0147982	0.0519543	0.624119	1.62202	0.182966	12.991	1.77146	0.0531929	1.69653	1.21692	0.00119098
	Var46	1.25135	0.0149556	0.246085	0.165024	0.314187	0.0217099	0.108199	0.0125967	0.000172345	0.065264	0.0156598	0.188201	0.148325	0.13369	0.0771918	0.168443	0.219866	0.226927	0.699647	0.484573	0.0409731	0.0767228	0.0316093	0.589593	0.0042428	1.20528	0.462847	0.296292	0.352522	0.189428	0.61781	0.226955	0.30064	2.25028	0.196016	2.63896	1.00701	0.262771	0.22177	1.514	0.296278	2.43868	5.30154	0.000777497	8.36343	0.797142	0.277819	0.0350858
	Var47	1.25067	0.0188259	0.23899	0.135852	0.36347	0.00279438	0.0571837	0.00918723	0.0634846	0.031199	0.137846	0.261025	0.413195	0.210486	0.092143	0.309717	0.350152	0.647151	1.05203	0.143398	0.0172702	0.00444921	0.215061	0.0912491	0.010264	0.607783	0.868814	2.32123	0.343762	0.234064	0.949138	3.47999	0.128377	0.246382	0.087298	2.07772	1.00665	0.173018	2.39472	0.530703	2.41541	0.136548	0.029508	0.769097	5.93757	0.00774399	0.201884	0.343547
	Var48	1.25044	0.0197365	0.230037	0.137721	0.463955	0.000204415	0.0174573	0.00235009	0.174901	0.00274036	0.233521	0.296718	0.337711	0.174306	0.0972622	0.556326	0.210422	0.779296	0.548466	0.00980632	0.331374	0.00098393	0.310833	0.00593845	2.34259e-07	0.28642	1.27466	2.95591	0.0286643	0.0234881	0.811784	3.6505	0.358306	0.169729	0.249331	0.135852	0.114499	0.566198	0.814587	1.17447	2.4922	2.44389	2.18224	0.59681	0.371501	2.47276	0.144687	0.211266
	Var49	1.25052	0.0183642	0.215048	0.184459	0.630508	0.00755767	0.00749462	0.00297699	0.152401	0.00153118	0.169889	0.105184	0.128234	0.0586566	0.0342722	0.445226	0.0608569	0.616859	0.265015	0.000302593	0.215162	0.013228	0.110217	0.199698	0.106696	0.119778	0.899886	1.11645	0.00774537	0.203253	0.407713	1.95251	2.31325	0.675294	0.0461349	1.97131	0.0800864	1.29618	0.166337	0.0220403	3.27913	2.70461	0.525712	0.0465005	0.109508	0.861965	0.000171553	0.349796
	Var50	1.25054	0.0152357	0.198333	0.324722	0.833191	0.0567298	0.0116699	0.00169416	0.0449998	0.00457865	0.0291035	0.0331122	0.00278322	3.17873e-05	0.013907	0.10495	0.000305677	0.0795346	0.437414	6.63107e-05	0.0262251	0.0196373	0.0273981	0.42694	0.38795	0.00189149	0.184265	0.0128378	0.000312596	1.28315	0.271292	0.820414	2.67043	0.56304	0.538432	1.22991	0.090866	0.951446	0.420692	1.11321	2.66124	1.07808	0.720539	0.461659	0.723732	0.689369	0.269504	0.894929
	Var51	1.24974	0.0113513	0.181069	0.685828	1.04446	0.163203	0.0281916	0.00325467	1.8218e-05	0.00794271	0.0246208	0.480535	0.301232	0.034758	0.250204	0.00124892	0.0225585	0.280812	0.828122	0.0198515	0.501412	0.329884	0.510951	0.397084	0.497782	0.0480395	0.105646	0.35811	0.11098	3.08824	0.0621005	0.0900171	1.59694	0.0159343	1.39892	0.54733	0.191135	0.0567354	0.470095	1.30081	0.085053	1.04747	2.92984	0.79037	2.01126	2.45333	0.00972031	0.0250539
	Var52	1.24705	0.00828578	0.159117	1.46064	1.29841	0.267419	0.078131	0.0426958	0.00708383	0.00486129	0.172935	0.79979	0.908806	0.0338372	0.612432	0.100586	0.0577833	1.16409	0.770362	0.0819763	0.823964	0.519607	1.10906	0.0831303	0.593877	0.0693249	0.942829	0.976452	0.207322	3.3998	0.00536677	0.0637967	1.06935	0.397591	0.545778	0.756196	1.15472	0.385622	0.151434	0.626302	0.363547	0.334517	0.638852	0.00501815	2.91657	1.37618	0.812696	0.548746
	Var53	1.24204	0.00790115	0.123807	2.68622	1.67194	0.27717	0.208925	0.141892	0.000668873	0.00126321	0.324919	0.407378	1.38286	0.0050074	0.796462	0.187653	0.164122	0.773189	0.0382824	0.117191	0.415349	0.190223	0.826706	0.024342	1.05204	0.00453605	1.15436	1.08939	0.123658	1.97484	0.0296476	0.221491	0.518257	1.23863	0.00158802	1.19048	2.00452	0.407204	0.0228058	0.172401	0.0285986	0.410818	1.88359	2.72368	1.82857	0.00389713	0.0180968	0.499171
	Var54	1.23593	0.0142632	0.0677945	3.87093	2.17537	0.190683	0.415929	0.258539	0.0413328	0.019687	0.546782	0.00151822	1.42052	0.0016015	0.868087	0.0888917	0.420082	0.00769391	1.21138	0.132705	0.00894644	0.0301029	0.0428476	0.0731133	1.78202	0.0336053	0.447812	0.578807	0.0405051	0.628622	0.0205771	0.412521	0.00430077	1.11029	0.299396	0.596453	1.20219	0.116673	0.0101305	0.14022	0.220577	1.05637	5.17454	4.25415	0.0990285	0.0511017	1.51932	0.923378
	Var55	1.22918	0.042574	0.00906338	4.04836	2.69836	0.096064	0.535616	0.300919	0.0728714	0.0192337	0.876581	0.346932	0.992525	0.00600035	0.764144	0.0220333	0.634124	0.436837	5.47279	0.165472	0.761885	0.679787	0.394071	0.0207988	2.04477	0.0714844	0.0204459	0.217135	0.00217642	0.00289333	2.18083e-06	0.811509	0.441945	0.615256	0.441761	0.0372017	0.216219	1.30362	0.120433	1.23634	0.267408	0.00398147	1.08785	0.665474	0.0629267	0.217699	1.00628	0.751121
	Var56	1.21252	0.138279	0.0298907	2.61181	3.18615	0.04495	0.324726	0.315815	0.0352706	0.000584781	1.10901	1.06938	0.304488	0.00153571	0.303	0.0146285	0.490205	0.661256	8.37696	0.168739	1.31699	1.58053	1.0424	0.10647	1.43144	0.0385917	0.0777709	0.174358	0.000352834	0.241931	0.0723329	0.593252	0.805184	0.521431	0.563641	1.73562	0.0127684	0.290747	0.986679	0.297094	0.00631739	0.959514	0.377875	0.898007	0.0201452	0.00913265	0.0396241	1.28799
	Var57	1.15711	0.393916	0.31196	0.513771	3.72582	0.0304131	0.00145978	0.346882	0.000866083	0.127087	1.05142	1.21935	0.0274492	0.0786482	0.000163689	0.00021467	0.08402	0.0236417	7.25868	0.051332	0.50223	2.17361	0.616191	0.687646	0.344706	0.0381386	0.338848	0.289032	0.0763685	0.10418	0.111079	0.0231925	0.0745579	0.076778	0.707471	3.68958	0.0151876	0.910145	0.184759	0.16989	0.211909	0.366939	1.07804	5.23945	0.0025117	0.0756482	0.838696	0.0783465
	Var58	1.02392	0.91585	1.05552	0.297562	4.3771	0.0380302	0.597323	0.318809	0.113308	0.547521	0.665871	0.449361	0.827767	0.275685	0.359094	0.0178224	0.040506	1.08729	3.57849	0.00661157	0.0648298	1.86874	0.00347419	1.46018	0.0749864	1.07697	0.364509	0.407918	0.891453	0.0994115	0.0521579	1.48748	0.425975	0.636367	0.123393	1.99553	0.0301311	2.94984	0.329356	0.0364011	0.0753452	0.0170592	0.225565	2.95243	0.00879968	0.00991783	1.13268	0.0332749
	Var59	0.805511	1.71967	2.2314	3.2161	5.00925	0.0511823	2.36941	0.179043	0.361246	0.825021	0.151254	0.000140805	1.46092	0.328122	0.834655	0.0409157	0.145286	3.6615	0.556563	0.0429306	1.21152	0.430317	0.440262	1.47874	0.802576	2.70901	0.0514936	0.233426	1.5144	0.501034	0.0296626	1.43742	0.328898	1.2828	0.0725076	0.0220537	0.0236292	0.787056	0.155093	0.360653	0.370376	0.000411226	0.0558183	0.730975	0.00015355	0.0992418	0.000165056	0.665544
	Var60	0.542272	2.7064	3.55858	6.76891	5.22727	0.0434366	3.54968	0.043161	0.416891	0.3398	0.0518345	0.184966	0.687151	0.0991558	0.470816	0.0457258	0.0450348	2.44532	0.0255285	0.0106636	1.04665	0.117507	0.579298	0.294012	0.568655	1.18989	0.0408929	0.0339684	0.21696	0.299534	0.00213463	0.023824	0.309259	0.053744	0.00255403	0.349757	0.163807	0.238127	0.0309867	0.369972	0.0345175	0.00285849	0.0688485	4.78036	0.161374	0.431109	0.273312	0.00902319
	Var61	0.289756	3.73094	4.73244	7.3717	4.49573	0.0157013	2.41935	0.000652019	0.110688	0.0394016	0.656559	0.225756	0.00460503	0.00249703	0.00191967	0.00451638	0.0122152	0.005386	0.161568	0.00119339	0.0108961	0.724724	0.0247045	0.477391	0.00225548	0.081545	0.106127	0.0188094	0.748294	0.00222444	0.0180074	0.52392	1.24956	0.389957	0.063843	0.262569	0.00350179	1.27597	0.180025	0.0194786	0.108094	0.000478323	0.0258673	0.285309	0.306566	1.33214	0.557736	1.43297
	Var62	0.101747	4.59207	5.42924	4.51981	2.75662	0.00010862	0.359867	0.00164445	0.0402028	0.88041	1.17641	0.0548926	0.823399	0.09973	0.250079	0.0118967	0.17689	1.97367	0.119911	0.00992182	0.514165	0.466195	0.224207	2.22726	0.600424	1.44441	0.0184468	0.127475	2.09757	0.0952808	0.0261193	0.791267	0.50451	0.714331	0.015796	0.0932029	0.263263	1.30687	0.0182786	0.354285	0.118817	0.00308696	0.0458136	1.50307	0.128763	0.144785	0.729216	0.249567
	Var63	0.0107041	5.10597	5.34498	1.24135	0.961294	0.0320196	0.43135	0.0069222	0.459986	1.47857	0.95386	0.00270059	1.07325	0.19722	0.422467	0.0255799	0.220812	3.83341	0.372192	0.003145	0.768715	0.0680111	0.263225	1.28525	0.744381	1.48849	0.000590134	0.058833	0.736012	0.142437	0.0130207	0.317508	0.00140206	0.218914	0.309479	0.0445957	0.457241	0.013224	0.0459279	0.0450326	0.0108007	0.185922	0.0331057	0.878999	0.433439	1.53299	0.0774743	1.07123
	Var64	0.0075866	5.25959	4.44668	0.0126448	0.0795761	0.118188	3.25927	0.092319	1.03262	1.2192	0.343649	0.0572788	0.283127	0.144097	0.313793	0.0523904	0.0239304	2.28717	1.12565	0.00930665	0.24815	0.016729	0.0262103	0.0129499	0.195386	0.579547	0.00312625	0.000139119	0.0424708	0.202445	0.207229	0.0266815	1.18733	0.058941	0.0644209	0.0402486	0.0180685	2.60601	0.000558471	0.0395246	0.749129	0.351024	0.00449846	0.0911983	0.0332623	0.419813	1.41172	0.502229
	Var65	0.0611591	5.17252	3.03274	0.347161	0.075466	0.222778	6.57835	0.166337	1.48625	0.649927	0.0110212	0.0759976	0.0158017	0.0165684	0.0953134	0.0700561	0.0985956	0.207306	1.21799	0.110974	0.000120218	0.160533	0.030164	0.546479	0.00473637	0.0921599	0.00729644	0.00940846	1.16106	0.356018	0.546176	0.00747077	2.89922	0.153514	0.254316	0.00765738	0.645668	1.09328	0.0214015	0.00311794	0.650265	0.0114207	0.144925	0.404888	0.019077	0.206755	0.72529	0.115169
	Var66	0.14479	4.94682	1.55724	0.90846	0.400635	0.321736	8.31161	0.124446	1.73539	0.190655	0.0769588	0.0103673	0.610661	0.0224562	0.021136	0.0083431	0.38734	0.325753	0.354423	0.256805	0.226383	0.255028	0.101719	0.958654	0.284071	0.000209842	0.000849341	0.000133872	1.43984	0.239733	0.268867	0.0612068	1.40556	0.00754367	0.235629	0.0351682	0.830526	0.315978	0.177784	0.215376	0.0789343	1.00087	0.0786503	0.000401837	0.378384	1.66012	0.200102	0.030479
	Var67	0.23662	4.64297	0.484078	1.19875	0.649281	0.354402	7.68298	0.0702437	1.7629	0.00565151	0.220511	0.0285671	1.80364	0.147862	0.35733	0.0257914	0.410024	1.20116	6.41988e-06	0.102773	0.738768	0.194005	0.119109	0.231581	0.639339	0.119729	7.78544e-05	0.0014367	0.12763	0.00324499	0.0193948	0.0564903	0.0746507	0.0551977	0.0551195	0.0765519	0.119898	1.52896	0.0628604	0.10606	0.377065	0.428075	0.127955	0.0144732	0.0220818	1.83886e-05	0.0221703	0.116527
	Var68	0.316357	4.32843	0.0320347	1.3068	0.699537	0.233415	4.92454	0.0397823	1.39028	0.0402256	0.173964	0.13666	2.58572	0.307316	0.642907	0.0765484	0.161299	1.32066	0.12345	0.01193	1.00196	0.00907949	0.152842	0.16485	0.210148	0.759091	0.0176346	0.0771942	0.596279	0.592951	0.0844643	0.00800121	0.271907	0.00198019	0.122375	0.00115133	0.00824883	0.762508	0.844348	0.0939586	0.0455878	0.443223	0.166615	0.403261	1.30094	3.89652	1.82492	0.711132
	Var69	0.373838	4.06321	0.0531777	1.3827	0.594221	0.0674113	1.70223	0.0210258	0.596126	0.0754237	0.0161536	0.26031	2.22568	0.319318	0.529678	0.138067	0.000864319	0.860169	0.236642	0.115021	0.592076	0.340384	0.16482	1.60861	0.174521	1.30822	0.0413683	0.208281	1.68529	1.17957	0.838646	0.0045906	2.22636	0.029225	0.0058105	0.0329386	0.343632	0.00115767	0.128292	0.803306	0.0699566	0.567147	0.00390331	0.220511	0.310485	0.654722	3.53064	1.34622
	Var70	0.41128	3.86714	0.250405	1.54181	0.438401	0.000259963	0.0442129	0.0204699	0.0121345	0.0236923	0.0514736	0.345764	1.33738	0.209886	0.218611	0.315601	0.0479804	0.322607	0.106572	0.0898009	0.012304	1.49318	0.166982	3.05305	0.714349	0.766266	0.0393738	0.227611	1.2164	0.594698	2.29036	0.000510655	5.39191	0.13167	0.0148054	0.0214919	0.576538	0.789967	0.571683	0.551004	0.449038	0.00833473	6.2846e-06	2.26469	1.34713	3.16138	0.0356554	0.0120253
	Var71	0.437879	3.72201	0.400395	1.82259	0.304716	0.0435813	0.751464	0.0399979	0.424704	7.62442e-05	0.274477	0.332109	0.62748	0.0973491	0.0142985	0.328155	0.118125	0.0690075	0.0149613	0.0707434	0.430515	1.68849	0.195861	2.19694	0.305187	0.197972	0.0247988	0.181201	0.116919	0.00590482	1.94704	0.396553	5.00254	0.0328437	0.0202584	0.381204	0.150691	2.43334	1.12073	0.18932	0.450701	0.0352659	0.187637	0.040917	0.828308	3.45489	4.05557	2.74028
	Var72	0.465374	3.58424	0.428939	2.15759	0.215069	0.152752	2.88514	0.0895518	1.69109	0.0102349	0.642473	0.201076	0.145877	5.06178e-05	0.0171628	0.0933958	0.177352	4.61382e-05	0.322038	0.0606231	1.0994	0.449008	0.273327	0.962522	0.256231	0.0185206	0.00519884	0.122243	0.327127	0.63701	0.224424	1.29682	1.30156	0.0607526	0.76707	0.841925	0.0634178	1.1277	1.56156	2.09445	0.329198	0.156735	0.0742299	1.66424	0.525555	0.111018	0.0424445	4.46174
	Var73	0.504922	3.40254	0.368689	2.4383	0.166328	0.256488	4.25953	0.195224	2.66261	0.00403574	0.938311	0.0340778	0.0035381	0.165894	0.000102285	0.00697068	0.0852707	0.0246121	0.723039	1.99093e-05	0.849664	0.123232	0.315581	1.16161	0.599215	0.0790834	0.000259027	0.175676	0.814439	2.29586	0.184833	0.384546	0.472924	0.103434	2.18116	2.75317	0.061804	0.875324	2.60587	0.17327	2.56024	0.541297	0.49263	0.472617	1.41768	0.225412	3.89809	0.0347075
	Var74	0.563897	3.13738	0.288405	2.58756	0.125758	0.274187	4.22507	0.328831	2.50641	0.0125995	0.82938	0.0251806	0.103415	0.337242	0.143756	0.00647102	0.0273837	0.00184073	1.23726	0.0727532	0.0914789	1.32373	0.174602	1.07301	0.519832	0.162876	0.0111056	0.201654	0.862764	1.82558	0.0827869	0.336464	5.50125	0.0146279	0.246565	1.99872	0.00162109	4.28728	0.148221	4.23186	0.227914	1.03175	0.113523	0.776934	0.0415866	0.00230405	0.395573	2.45868
	Var75	0.644664	2.77265	0.229424	2.58415	0.0712606	0.162651	3.97056	0.354522	1.71727	0.0313605	0.585948	0.2201	0.064171	0.255318	0.284248	0.0177634	0.00771409	0.0321524	1.13057	0.221747	0.12154	1.81072	0.0802502	0.10305	0.20449	0.117362	0.12844	0.0157867	1.69145	0.0595286	0.483302	1.27395	5.16436	0.000153889	1.8858	1.25751	0.120192	0.294986	3.1589	2.13968	1.99663	0.277397	0.00857951	1.26519	1.15415	0.0217096	1.60583	0.00390238
	Var76	0.743402	2.32556	0.195988	2.39304	0.023416	0.0587001	3.45269	0.168467	0.913791	0.014544	0.394393	0.198798	0.0229553	0.0496621	0.0874828	0.000166228	0.051938	0.38716	0.34114	1.08968	0.323596	1.20624	0.0144069	4.81279	0.00103682	0.607473	0.349906	0.378967	1.33499	0.76348	0.435858	0.267661	0.0370647	0.761635	2.05985	2.93813	0.291121	1.55783	3.82335	2.64658	0.197633	4.68779	0.323898	0.0350398	0.522786	3.2005	0.53106	0.272782
	Var77	0.850153	1.84406	0.170227	2.0192	0.000226447	0.0233702	2.15467	0.0498894	0.344491	0.174816	0.139277	0.00136098	0.175143	0.133499	0.0304596	0.11284	0.11072	0.273989	0.1044	2.02067	0.592536	0.354807	0.277617	8.72773	1.03571	0.00639746	0.00151315	1.9023	0.768478	3.34955	0.780688	0.313005	2.95292	1.32712	0.00156206	0.824828	0.143896	0.100727	0.71223	1.96679	0.562151	0.486969	0.00733408	0.169116	0.139833	1.93486	0.0928367	0.723196
	Var78	0.954304	1.37484	0.139419	1.61581	0.0258898	0.0147167	0.946714	0.117345	0.065129	0.127327	0.0296855	0.0470733	0.688277	0.606395	0.188973	1.00285	0.0315862	0.158829	0.0165201	0.403768	0.288064	0.000624008	1.33572	3.90986	4.10989	1.2133	2.40869	0.912495	10.7764	4.22773	2.56902	1.27446	0.907749	0.352443	0.11493	0.338125	1.84699	2.18071	0.348713	0.0506637	0.199741	1.37029	0.337715	0.0133834	0.047618	0.979312	0.104617	2.17462
	Var79	1.04789	0.950665	0.115513	1.29354	0.117776	0.00975857	0.471673	0.131489	0.0377646	0.0241179	0.0769979	0.000977724	1.18664	0.304211	0.0124263	2.49141	0.674247	0.820273	1.41217	0.218298	0.193792	0.40438	0.41803	0.0214906	5.00258	0.466159	7.28089	0.387467	6.66395	0.117478	1.28261	0.745621	0.519251	0.0713402	0.781209	3.53126	0.215157	0.170907	0.140957	0.169892	2.11474	0.237482	1.92884	2.71382	0.100297	0.0842182	0.00339789	1.75166
	Var80	1.12492	0.599947	0.10506	0.992766	0.252541	0.000234606	0.558474	2.57358e-05	0.550273	0.00339053	0.0514822	0.210968	1.01685	0.0247398	0.631579	1.29786	0.661305	1.923	3.85533	0.969013	0.0254594	1.99505	0.127328	0.339816	3.89899	0.820521	3.50542	2.16915	0.237639	2.25413	0.541357	0.252824	0.219794	2.84295	3.43989	1.78555	5.87906	4.5064	1.42857	0.0686423	0.029718	1.0549	0.523405	0.0436214	1.86459	0.0816873	0.325622	0.927554
	Var81	1.18147	0.34214	0.0977252	0.736611	0.429104	0.0201817	0.852929	0.0815429	0.688286	0.0734682	0.0455626	0.0649798	0.157832	0.057764	0.559209	0.199926	0.0269052	2.13712	4.99853	0.845304	2.12426	1.17734	0.0397124	0.0803595	3.71352	2.00758	0.0518603	0.0165938	2.99241	1.33602	0.0939139	3.20391	0.0423392	4.99737	0.569494	0.352966	0.536244	0.929891	0.108123	0.0304334	1.15743	0.000692242	2.0186	0.573371	0.472499	1.72848	0.843605	9.00833
	Var82	1.21883	0.171562	0.0863432	0.565662	0.639217	0.0080747	0.772248	0.153574	0.260091	0.377575	0.31234	0.179509	0.00949561	0.0732165	0.000109643	4.00787	0.338496	0.33904	4.32668	0.0353017	3.45481	0.0980238	1.16742	0.943274	1.21979	0.0334243	2.52886	8.33785	0.629514	0.00128781	0.593621	1.26397	0.0108654	0.0812138	1.53874	3.41462	0.0185271	2.47492	0.0274749	0.0696899	0.0686301	0.275324	0.0378338	2.39482	2.03737	0.0238915	2.46201	0.0386256
	Var83	1.24133	0.0702139	0.0756539	0.417632	0.772533	2.81909e-05	0.471337	0.213918	0.205361	0.306069	0.338002	0.133509	0.0458564	0.00185002	0.0774794	3.97799	0.901002	3.33812	2.20019	0.0277701	0.930345	0.21197	2.93183	3.99706	0.693756	5.90365	1.55887	11.6297	0.0777782	0.202884	0.6467	0.128182	0.0949695	0.000824567	0.920139	2.72921	0.758026	3.3459	0.0665196	0.037387	0.0538774	1.6795	1.36465	1.66731	0.360952	0.379063	0.00547283	3.80831
	Var84	1.25292	0.0185922	0.0729581	0.29241	0.828519	0.00119805	0.456188	0.262835	0.60584	0.0937883	0.184178	0.0804654	0.084005	0.146965	0.125032	0.372867	0.537173	12.8397	0.594883	0.107724	0.0464054	0.252709	0.18504	1.0841	3.4964	11.9635	0.156411	1.08134	0.029817	1.8133	5.34314	0.450547	0.179053	1.04981	2.82935	0.131081	0.360685	2.10435	1.36341	0.0366956	0.0556022	0.0938123	0.00872775	1.53859	0.451022	0.436527	0.91763	3.51234
	Var85	1.25667	0.00059024	0.0753069	0.213909	0.951672	0.0148868	0.744676	0.25409	1.88611	0.00361338	0.0392483	0.224754	0.0096502	0.767862	0.0764499	0.362345	0.259274	7.58177	0.109829	1.34813	0.15502	0.424277	1.71931	1.02079	2.0218	7.10626	1.40541	3.10172	0.718277	0.00230711	3.78553	0.233777	0.0034055	0.439753	1.57977	0.507463	0.768148	2.58082	0.00909556	0.12501	0.0783799	4.73504	0.223588	0.00043787	2.86833	0.153945	2.04464	0.0276611
	Var86	1.25565	0.00474686	0.0729037	0.169487	1.05553	0.0456341	0.847396	0.0248326	3.33137	0.214733	0.116403	0.0049641	8.23962e-05	1.52124	0.28687	0.951998	0.946548	0.81638	2.39732	3.68266	1.62522	0.00469752	1.95201	2.57482	0.302581	0.123936	0.0897616	2.8201	0.102863	1.59213	1.1951	0.697245	0.705596	1.25993	9.47462	0.503513	2.03642	1.42914	0.178481	0.0485017	0.730684	0.0163128	0.317882	1.33246	0.0338275	1.25598	0.00095325	1.06904
	Var87	1.25201	0.0221816	0.0697058	0.129211	1.07924	0.0802138	0.483063	0.149251	3.52789	0.565657	0.709832	0.00483207	0.269782	1.27184	2.36912	0.475704	2.496	0.00682404	2.39731	3.28468	4.85036	0.112079	7.64594e-06	2.25847	0.0297144	4.1641	3.13541	1.51823	0.125952	0.0273389	0.260674	0.00136855	0.0795819	0.658972	10.127	1.81982	0.000823102	1.98688	0.184533	0.0246361	0.0485492	1.96347	1.99487	2.13754	0.567858	0.184789	1.22572	1.81366
	Var88	1.246	0.0507708	0.0711566	0.076673	1.11305	0.0591596	0.214838	0.311242	3.22979	0.0894107	0.212422	0.417672	1.19256	0.536915	2.57431	0.0636926	1.68284	4.90247e-06	0.504606	0.601141	5.74394	0.280614	3.03845	2.78717	0.0707752	4.91364	2.70838	2.28525	1.60722	1.51076	0.591293	0.176324	0.611027	0.167241	6.25889	0.193936	2.27267	0.196644	0.165437	1.16655	0.159884	0.0163381	0.679988	0.0448222	0.0347246	2.99105	0.13446	0.296337
	Var89	1.23845	0.0876842	0.0686506	0.0329494	1.07031	0.0378395	0.218897	0.0685985	2.47451	0.0197232	0.0220552	1.69734	0.851286	0.0117119	0.812919	1.66191	0.217534	0.0890122	0.522774	0.034485	1.83819	0.0261523	6.06597	0.541425	0.497838	0.379249	2.66412	3.92538	0.0157395	0.230582	5.32362	0.324658	2.27394	0.00851093	16.2005	0.027306	0.926728	2.7344	0.255405	7.76703e-05	1.628	0.0892297	0.0486719	2.82702	0.819644	0.0222439	0.0506832	0.044807
	Var90	1.23041	0.127291	0.0633263	0.00981508	0.968422	0.109007	0.242092	0.0167045	1.6753	0.0308199	0.000837424	1.09046	0.133297	0.112595	0.0301561	1.86618	0.00395983	0.0476271	1.36175	0.433016	0.000885086	1.11825	4.36378	0.14147	5.42375	7.24207	0.659985	12.5126	4.90718	0.537639	3.56185	0.00610392	1.8686	0.166305	1.2063	0.00157924	0.0213022	0.0049455	0.0644681	0.378579	0.0293899	0.222017	0.677977	1.50304	0.0393828	1.28425	0.276162	0.533474
	Var91	1.22279	0.16218	0.0701052	0.000705825	0.947012	0.325754	0.108397	0.0534016	1.47786	0.249301	0.127432	0.234274	0.0222424	0.0194386	0.409935	0.194954	8.65943e-05	0.0106853	1.57022	0.426421	0.802313	3.39588	4.95164	0.0264618	1.97162	0.541691	2.78251	1.76556	4.10975	1.20866	0.142458	2.56183	1.85096	2.01083	6.96911	0.791706	3.30715	4.5892	0.0134624	0.295128	4.22461	0.126598	0.895273	0.0512221	0.57894	0.0727069	0.0712458	0.988502
	Var92	1.21545	0.19313	0.0903584	1.89994e-05	0.965088	0.406859	0.0411421	0.0697003	1.92194	0.156208	0.124542	0.00939031	0.135872	0.00251065	2.14125	0.198248	0.332608	0.340571	1.53938	0.00133441	2.24943	2.83277	4.62073	0.0118084	3.68085	4.02047	6.99251	1.27236	1.1282	0.0563859	1.28078	3.98637	0.273649	0.2842	0.468731	2.38885	5.01144	1.12727	0.0363292	0.40464	0.0781777	2.08926	0.029037	1.1164	0.0926421	0.552545	3.93769	4.3933e-05
	Var93	1.2069	0.230706	0.102983	0.00236535	0.985294	0.193717	0.107436	0.205602	2.65525	0.145221	0.00087984	0.0451271	0.664969	0.308169	3.1077	0.536318	1.31574	2.08666	0.402613	7.06953e-05	1.12219	1.0186	0.04732	0.173872	13.9671	3.28294	2.2403	1.4616	0.875311	0.317399	0.126588	0.434674	2.72231	0.0313588	1.19608	0.141658	0.642382	0.983689	0.0150245	0.2711	3.22806	0.90311	0.122295	0.00510368	0.106388	0.949036	0.44734	0.0471197
	Var94	1.19682	0.276353	0.0991681	0.00219113	1.08918	0.0239577	0.262164	0.453158	2.94217	0.0657162	0.118921	0.0375337	1.23874	1.0308	2.30226	0.660326	0.354208	3.95164	0.282859	2.39381	0.0360176	0.0786286	4.72099	1.30264	5.61583	0.0143697	0.169626	0.0228303	1.06765	0.350991	0.00206879	0.831344	1.52282	1.3217	0.380883	0.504067	4.15025	0.354029	0.149675	0.752206	1.05693	3.7281	1.19575	0.654872	0.813341	0.0424129	3.85498	0.0777265
	Var95	1.18799	0.316229	0.0983136	0.00121899	1.17439	0.00649209	0.27284	0.754237	2.66123	0.0687451	0.131233	0.00712976	0.8958	1.08888	1.19728	0.967355	0.127547	2.89126	1.21499	4.73472	0.0508803	0.0181122	9.79262	0.112949	0.0506045	1.84814	2.64773	0.0576824	0.495532	0.0846235	0.00180603	1.42799	0.0998963	1.83812	0.125437	0.249783	0.815197	0.0349003	2.17269	0.745165	1.95499	2.0877	0.0920105	0.380793	0.304036	3.37376	3.35435	0.0615186
	Var96	1.18272	0.340767	0.10527	0.00801602	1.10265	0.0481761	0.240143	0.62407	2.30261	0.395234	0.0425301	0.108466	0.168878	0.236666	0.434712	1.1984	0.525454	2.72722	0.303322	0.561736	0.111459	0.819628	8.67964	1.99703	2.52658	1.97849	1.47913	0.327487	0.0124294	1.43739	0.000237382	0.00232385	1.26559	0.848413	0.388024	1.52734	7.7398	0.282725	0.0280581	1.38418	2.89547	2.23182	2.14887	1.51291	0.804507	0.0750749	0.363345	3.43303
	Var97	1.17857	0.360848	0.108576	0.00883161	1.01983	0.0589093	0.301491	0.181735	2.12671	0.292198	0.0139673	0.212661	0.0023122	0.369091	0.0119799	0.608901	0.343669	1.69889	0.0207773	0.000356146	0.204653	3.73271	3.21613	4.8479	1.28914	0.00296354	0.090437	0.238561	1.52574	0.171274	1.50778	0.981054	0.812847	1.29708	0.147316	8.01064	0.0282513	1.00381	3.17205	1.83761	0.19541	3.3231	0.00172885	0.507216	1.23105	1.65301	0.254035	0.00120096
	Var98	1.17337	0.384965	0.108403	0.00898091	1.02342	0.0231632	0.255612	0.0401984	1.75126	0.242715	0.0077883	0.0865841	0.00359028	1.53635	0.0990655	0.00260982	0.0541901	0.257722	0.0279124	1.67968	0.547295	5.00562	0.00822016	5.75947	0.0368588	3.46344	0.731733	2.80684	6.26726	1.0726	3.30999	0.0427268	0.807692	3.04874	0.622562	1.35462	5.37028	1.30031	1.02885	3.34744	2.13151	0.0711525	0.0320751	1.57419	1.92606	0.38887	0.664654	7.73166
	Var99	1.16811	0.407913	0.112658	0.0078156	1.09876	0.0282738	0.122945	0.104145	0.97406	0.226455	0.0164171	0.148024	0.0255681	1.18155	0.1383	0.25757	0.0384314	3.96702	0.0014453	5.35542	1.09127	4.41407	0.419666	1.97001	0.166008	5.19493	5.07271	1.98666	3.68152	0.461238	0.0264223	3.21889	1.68737	3.91823	0.226072	5.11926	1.18754	2.0202	2.41326	0.860896	4.92384	0.963538	1.59369	2.47715	0.00168921	0.885886	0.576006	5.24939
	Squared cosines of the variables:
		F1	F2	F3	F4	F5	F6	F7	F8	F9	F10	F11	F12	F13	F14	F15	F16	F17	F18	F19	F20	F21	F22	F23	F24	F25	F26	F27	F28	F29	F30	F31	F32	F33	F34	F35	F36	F37	F38	F39	F40	F41	F42	F43	F44	F45	F46	F47	F48
	Var1	0.973352	0.00180391	0.00288689	0.00151293	0.000764257	0.0194469	9.59797e-05	3.02239e-05	8.72092e-05	2.28245e-08	1.34636e-07	1.48786e-05	2.00057e-06	6.98286e-08	9.10311e-08	4.20648e-07	5.80551e-07	3.01608e-09	2.48615e-09	2.5658e-08	4.0144e-07	1.39384e-07	4.18468e-07	6.54883e-09	2.63862e-09	9.71983e-08	1.92593e-07	5.60472e-08	3.29596e-08	3.43142e-08	1.15066e-08	8.46311e-09	2.09563e-10	2.96195e-10	8.64831e-09	1.90266e-08	4.39256e-10	7.38422e-10	1.82653e-13	3.68451e-11	1.07532e-10	6.96269e-11	2.49533e-10	5.38663e-11	7.81504e-10	7.24576e-10	9.12536e-12	2.07872e-12
	Var2	0.826458	0.170022	0.000640057	3.50413e-05	0.0021624	1.24009e-05	9.56513e-05	1.38064e-05	1.72997e-06	5.85157e-05	0.000148115	4.02513e-05	4.93861e-06	9.99496e-05	2.67029e-05	1.32962e-06	0.000109752	1.00796e-05	1.52196e-07	2.84467e-05	5.19974e-06	5.53357e-07	1.41062e-06	8.84245e-07	7.98931e-06	6.42257e-07	9.97826e-07	4.19085e-09	2.5323e-06	1.62095e-06	7.4633e-07	5.06438e-07	3.33773e-07	5.14108e-06	2.05043e-07	5.6391e-07	4.0651e-08	1.99453e-07	6.06044e-10	6.88707e-09	8.10848e-08	2.4954e-07	2.77274e-07	5.52209e-08	1.33883e-08	3.67509e-09	1.96496e-08	5.48959e-08
	Var3	0.834485	0.16231	0.000599524	1.0905e-05	0.00185299	1.20156e-06	0.000155641	9.25224e-06	3.51646e-06	3.03696e-05	0.00030351	6.99939e-06	7.38382e-06	0.000152028	1.0121e-05	4.67609e-08	1.54963e-05	3.59199e-06	2.99823e-07	5.17971e-06	3.28836e-06	1.4821e-05	2.97113e-07	2.07021e-06	3.35802e-06	1.92205e-06	2.45696e-08	2.28658e-08	5.35368e-07	9.72213e-08	4.8058e-06	1.35763e-06	4.75069e-08	2.85837e-06	1.172e-07	7.96106e-09	3.28033e-08	3.77345e-07	4.40959e-07	5.70217e-09	3.45841e-08	1.05379e-09	2.68171e-07	3.19706e-08	1.00843e-08	1.78949e-08	4.68397e-08	2.1947e-08
	Var4	0.843127	0.153689	0.000586878	1.03314e-05	0.00173893	5.75374e-07	0.000186486	5.84307e-05	1.01551e-05	1.88199e-05	0.000330394	5.36391e-06	7.72504e-05	6.68753e-05	3.28587e-07	2.87192e-05	3.17769e-05	2.49449e-07	2.854e-08	4.33767e-06	4.57084e-06	1.03756e-05	6.38965e-07	9.81712e-07	3.8715e-06	1.66459e-08	2.32654e-07	1.80246e-07	1.34451e-07	1.57389e-06	3.01601e-08	2.33674e-06	1.20742e-07	9.92087e-07	2.94256e-07	4.97093e-07	2.13209e-10	5.59692e-10	5.91606e-07	1.33369e-07	3.98674e-10	1.2325e-07	3.4873e-08	2.79445e-08	8.77683e-08	4.68644e-09	9.72637e-09	3.46233e-09
	Var5	0.854789	0.142113	0.000443163	3.96492e-05	0.0018029	1.18614e-05	0.000114657	0.000306259	1.03927e-05	1.23168e-05	7.44267e-05	1.72101e-05	3.81708e-05	6.13395e-07	2.04874e-05	0.000125442	3.5847e-05	3.79645e-06	2.15424e-06	8.51137e-06	6.77398e-06	8.19833e-06	2.77619e-06	1.09168e-07	3.56477e-08	3.48706e-06	1.62817e-07	9.61472e-07	1.38881e-08	3.37811e-08	5.42075e-06	9.27112e-08	2.94993e-07	3.14222e-07	1.93904e-09	5.92021e-08	5.38236e-07	1.23364e-07	4.43288e-09	1.31145e-10	4.16123e-08	1.76429e-09	3.58953e-09	1.31472e-07	1.41683e-07	5.57561e-08	7.68728e-10	3.19703e-09
	Var6	0.871621	0.125267	0.00032698	5.63414e-05	0.00188734	2.65423e-05	3.11144e-05	0.000475822	1.69566e-05	1.79635e-05	9.83736e-06	3.98204e-06	3.18804e-05	1.0769e-05	4.51086e-05	8.85791e-05	1.43874e-05	7.79971e-06	3.26945e-07	5.0731e-06	1.12936e-13	3.37939e-05	1.11024e-05	1.28465e-06	4.47448e-08	1.15638e-08	1.06006e-09	7.09075e-08	7.83875e-07	7.1977e-07	8.38856e-07	3.90181e-06	5.10909e-07	5.2299e-08	6.88749e-08	2.03925e-07	2.17766e-08	3.00616e-08	7.93598e-07	1.61432e-08	8.58985e-09	1.99751e-07	1.12156e-09	6.84359e-09	5.92814e-08	5.34805e-08	4.11734e-08	1.05282e-08
	Var7	0.888903	0.107807	0.000287059	3.87978e-05	0.00213347	4.55481e-06	1.52632e-05	0.000285449	7.38472e-05	4.13011e-05	4.91603e-05	3.14183e-05	0.000188212	7.75761e-07	3.56842e-05	2.29567e-06	7.33588e-05	3.79342e-07	4.24978e-06	3.26632e-06	1.68961e-07	1.75357e-06	8.45285e-06	2.6118e-07	4.12184e-07	2.88529e-06	2.1942e-06	5.5345e-07	5.08761e-07	7.51748e-07	7.08797e-07	1.76999e-07	2.9702e-07	1.01467e-06	8.29634e-10	4.5543e-08	2.50861e-07	1.23512e-07	8.60085e-08	1.26422e-07	5.6381e-09	6.44413e-08	2.14195e-08	6.97713e-08	6.75236e-08	5.926e-08	1.9629e-08	5.58126e-08
	Var8	0.905045	0.0912996	0.000272396	1.36979e-05	0.00258309	1.44455e-06	6.49908e-05	0.000129202	0.000175367	4.2015e-05	7.65916e-06	0.000143039	0.000114749	1.53217e-07	1.51298e-05	2.72092e-05	1.03014e-05	5.31626e-07	1.41401e-05	9.96848e-07	8.88205e-06	1.60002e-05	5.30785e-07	2.27212e-06	1.35836e-12	2.20945e-07	1.155e-07	1.57491e-06	4.34142e-09	2.60539e-06	1.05451e-07	4.10722e-06	1.13698e-06	3.65243e-07	7.61617e-10	1.60986e-07	4.93426e-07	9.89959e-08	4.8566e-08	5.89941e-09	6.26421e-09	1.82887e-07	1.59786e-08	1.91768e-07	1.77977e-07	2.15936e-09	8.03704e-09	1.04872e-08
	Var9	0.925268	0.0705394	0.000319918	8.53821e-07	0.00303862	3.14699e-06	0.000234474	0.000104326	0.000149967	9.4908e-06	2.00111e-05	0.000126493	1.9648e-06	1.96365e-05	5.13697e-07	7.34388e-05	1.35307e-05	3.24633e-07	1.26776e-06	2.35213e-05	3.00411e-05	6.37996e-06	8.15114e-07	4.48063e-06	2.35932e-06	5.14091e-08	1.48877e-06	4.25299e-07	2.20415e-07	2.66126e-07	1.38304e-06	6.18325e-07	9.04743e-07	5.62368e-07	4.06283e-09	1.78587e-07	1.16961e-11	4.57613e-08	8.61178e-08	2.04675e-07	8.01274e-09	3.65465e-08	4.82277e-08	2.71867e-08	6.49425e-08	1.84625e-07	4.73834e-10	6.02127e-08
	Var10	0.947963	0.0472319	0.000371442	3.02333e-05	0.00344633	1.09496e-06	0.000403134	0.000103548	8.11821e-05	4.47583e-06	6.68925e-05	1.40232e-05	2.5722e-05	0.000113965	3.13709e-05	4.21657e-05	2.1896e-05	1.6481e-07	1.05962e-05	1.02513e-05	2.46109e-06	8.52015e-06	3.17736e-06	4.59535e-07	6.64894e-08	4.164e-08	5.74427e-08	1.54305e-09	1.63118e-06	1.19099e-06	2.05463e-06	5.0689e-06	3.17982e-07	5.87403e-08	3.74784e-10	1.27137e-07	1.04989e-06	5.3519e-08	8.10249e-08	2.7836e-08	1.73497e-08	3.75291e-09	6.98281e-09	6.87214e-08	5.04396e-08	8.34042e-08	3.06658e-08	8.66038e-08
	Var11	0.969155	0.0254844	0.000301821	7.53563e-05	0.00405192	1.10689e-05	0.000371637	7.14856e-05	7.84518e-05	1.07749e-05	7.01393e-06	3.90082e-05	1.3489e-05	0.000121151	0.000130107	4.95215e-06	6.14423e-07	7.49669e-06	5.09153e-06	1.02767e-05	2.66264e-05	1.05484e-05	2.17505e-07	3.18395e-07	6.43188e-08	1.55463e-07	8.83699e-07	9.53778e-07	2.65619e-07	1.15776e-06	5.48514e-06	6.02703e-07	1.77001e-08	1.24591e-07	3.57875e-08	2.92154e-07	8.08302e-08	1.43088e-08	2.55152e-07	2.58022e-09	1.37959e-07	3.36619e-08	2.61903e-08	1.41421e-07	1.3699e-08	1.34892e-08	1.31416e-08	1.75452e-09
	Var12	0.98629	0.00786995	0.00029178	6.95011e-05	0.00456141	6.82754e-05	0.000217024	2.8114e-05	0.000128025	9.03496e-07	0.000109655	0.000178184	1.8256e-06	6.1316e-06	9.62765e-05	2.84454e-08	1.75653e-08	8.41492e-08	2.86251e-06	1.5823e-05	4.112e-05	1.16303e-06	7.0338e-06	9.32752e-08	4.40612e-06	7.09544e-08	1.00483e-06	1.27453e-07	4.52191e-07	6.94179e-08	1.4583e-06	5.58862e-06	2.85602e-07	6.32338e-08	2.20696e-07	6.02601e-08	1.36618e-07	2.70599e-09	9.40353e-08	1.11768e-07	3.03412e-09	8.98451e-09	2.2807e-07	1.78276e-08	2.3241e-09	1.28168e-07	1.07301e-09	9.70965e-09
	Var13	0.993983	4.59741e-05	0.000715146	8.91902e-06	0.00426728	5.01606e-05	8.45306e-05	2.75257e-06	0.000256929	8.01785e-08	0.000262679	0.000176308	1.69121e-05	3.8671e-05	5.07741e-06	1.61794e-07	2.66972e-05	2.05694e-05	7.354e-06	5.08115e-06	1.87097e-06	5.41984e-06	5.6103e-06	3.61637e-07	1.23722e-07	1.60956e-07	7.65211e-07	4.68869e-06	6.76475e-08	2.88183e-06	2.68722e-06	1.27979e-07	7.00601e-08	2.76184e-07	4.57002e-11	1.61826e-08	1.13403e-07	4.51172e-08	1.61499e-07	5.04111e-08	1.02703e-07	5.2106e-08	1.42899e-08	7.72472e-08	5.18105e-09	7.06258e-08	8.36125e-09	3.82418e-08
	Var14	0.987258	0.00638234	0.00204881	6.46212e-06	0.00341586	1.01139e-07	3.55511e-05	0.000203298	0.000299603	2.68535e-05	7.89779e-05	3.13935e-05	1.09369e-05	5.83491e-05	1.49465e-05	1.03379e-06	6.75933e-05	7.27215e-06	2.13005e-06	2.64635e-05	3.66364e-06	4.08006e-06	4.05402e-08	1.58058e-06	3.29889e-06	7.33238e-07	4.31222e-06	8.23218e-07	1.06917e-07	5.26612e-07	2.72638e-06	5.23921e-07	4.89545e-08	2.36366e-07	1.28734e-07	3.39401e-07	1.71662e-08	2.37198e-08	4.88606e-07	1.38673e-08	5.96123e-08	6.58521e-09	8.43265e-08	1.01364e-07	2.72359e-08	1.88645e-08	7.64467e-09	7.10423e-09
	Var15	0.964583	0.0270484	0.00460393	4.17173e-05	0.00257676	3.90897e-05	8.01167e-05	0.000566229	0.000151637	0.000143641	1.969e-06	3.82587e-05	2.72259e-07	1.93524e-05	3.05762e-05	1.67227e-06	1.37324e-05	7.02788e-06	4.93791e-07	4.54877e-08	6.24699e-06	2.53856e-05	3.24694e-06	1.04089e-06	2.0391e-07	9.03635e-07	3.15072e-06	2.4314e-06	7.82177e-10	6.31337e-07	3.2796e-06	3.12753e-07	2.24368e-06	1.42865e-06	5.2156e-08	1.69964e-07	3.52897e-07	6.01472e-09	2.59401e-08	6.64885e-08	2.54213e-08	7.6463e-08	2.70286e-07	2.84682e-08	4.07817e-11	3.30351e-08	8.55061e-11	2.25089e-09
	Var16	0.928945	0.0581689	0.00936876	0.000224145	0.00187452	3.72377e-05	0.000225289	0.000669807	0.000105254	9.3464e-05	2.2636e-06	0.000169378	1.40386e-05	6.13614e-07	7.85062e-06	7.91447e-07	8.23856e-06	1.20092e-05	1.4847e-06	2.7743e-05	2.2818e-05	2.15572e-06	5.8289e-07	5.10506e-07	4.16781e-07	9.96315e-06	2.52928e-06	2.47223e-08	2.52322e-07	9.83812e-07	1.60499e-06	9.75312e-08	6.46951e-08	2.81856e-07	3.17667e-08	3.47821e-07	5.63773e-08	2.06779e-09	5.74268e-08	4.22905e-08	3.53411e-09	1.3303e-07	6.67872e-08	1.55074e-07	1.12525e-09	5.52119e-08	3.7638e-09	1.39218e-09
	Var17	0.88318	0.0957945	0.0176022	0.00100917	0.00125521	5.33237e-06	0.000265926	0.000606199	9.72789e-05	1.45696e-06	1.05674e-05	2.47426e-05	4.65047e-06	5.20305e-05	1.49629e-06	1.42514e-05	3.33513e-05	5.49226e-06	3.20242e-07	6.37224e-06	4.54406e-06	5.06281e-06	2.39766e-06	3.50443e-07	1.47746e-06	4.47832e-07	4.89985e-06	2.40937e-06	1.83352e-08	3.63263e-09	3.11381e-06	9.25554e-07	9.04371e-07	1.25603e-06	2.87451e-07	3.12057e-07	6.2388e-07	1.37144e-08	3.62055e-07	1.74555e-08	1.19194e-07	3.15153e-08	1.04711e-07	5.53794e-09	2.15025e-09	2.04825e-08	4.17086e-09	2.98112e-10
	Var18	0.827262	0.138097	0.0300597	0.0028089	0.00077817	2.29629e-06	0.000193671	0.000305861	1.93613e-05	0.000138157	1.66238e-05	7.58386e-05	1.59589e-06	8.79527e-05	2.96182e-07	3.35367e-05	3.38433e-05	1.54779e-05	2.06254e-08	2.41927e-05	2.22837e-05	8.78092e-06	1.58721e-07	7.86474e-06	2.63682e-07	3.54842e-06	5.89375e-08	5.70818e-07	1.29207e-07	2.10743e-08	1.85932e-07	1.26476e-07	2.01612e-07	1.29097e-07	3.75885e-07	8.12122e-09	6.93737e-08	9.40559e-08	6.68048e-08	1.20395e-08	6.64354e-10	2.25699e-07	5.96e-08	4.00338e-08	4.76085e-08	1.7015e-08	1.33246e-09	8.03969e-11
	Var19	0.751092	0.193385	0.0491121	0.00509877	0.000482612	5.29192e-06	0.000165691	1.73607e-05	8.60676e-08	0.000361433	1.5002e-05	0.000114535	3.19398e-06	5.0988e-06	8.09733e-05	5.03212e-06	6.71296e-06	2.93087e-06	4.87566e-06	1.04404e-05	1.71513e-06	7.38922e-06	4.85961e-06	1.68129e-06	3.58088e-06	1.84214e-06	3.90298e-06	2.67807e-06	5.2757e-07	5.46051e-08	2.5384e-07	9.94799e-07	2.72935e-09	4.54006e-07	1.17459e-07	6.3166e-07	5.84676e-09	1.25199e-07	2.20014e-07	9.49568e-09	8.81608e-09	2.09634e-08	7.59101e-10	6.50196e-08	4.74503e-08	1.33341e-08	3.46873e-09	7.85775e-09
	Var20	0.622009	0.285722	0.0829744	0.00804234	0.000269367	2.56253e-06	0.000139727	5.01708e-05	1.39684e-08	0.000559474	2.92652e-06	4.03531e-07	1.73319e-06	4.20085e-05	0.000103715	2.44121e-05	2.01795e-06	2.89945e-06	3.97766e-07	2.86761e-05	8.37465e-06	2.5316e-07	9.1623e-08	6.51061e-06	2.08534e-11	2.13482e-07	1.22122e-06	2.51349e-06	1.15075e-06	6.97669e-08	1.01688e-07	2.47319e-07	2.09715e-07	8.8204e-09	2.47067e-07	6.56669e-08	3.50146e-07	1.96848e-08	3.18184e-08	7.53154e-08	7.94539e-08	1.12089e-07	5.3018e-09	2.77396e-08	1.43662e-09	9.98064e-13	7.17865e-12	8.07554e-09
	Var21	0.366433	0.460102	0.157879	0.0147031	4.73441e-05	3.24489e-06	7.01746e-05	0.000130064	6.82336e-07	0.000301683	2.27669e-05	0.000160893	3.65537e-05	4.87249e-05	7.94896e-06	1.17174e-05	4.61491e-07	7.7183e-06	1.01903e-06	7.84484e-06	1.34925e-06	3.20628e-06	2.25973e-06	2.1451e-06	4.47126e-06	5.25907e-07	3.56046e-06	1.0825e-06	1.03839e-06	6.1653e-08	9.35201e-10	1.15732e-06	1.15453e-06	1.11735e-07	3.69713e-08	2.27267e-07	9.00299e-07	2.53966e-08	2.09871e-07	1.14841e-08	2.70224e-07	4.57024e-09	1.32244e-09	2.67385e-08	8.22258e-08	2.84085e-13	5.1631e-09	2.03218e-13
	Var22	0.00916832	0.66791	0.296497	0.0255069	9.99333e-05	3.27004e-06	2.81959e-06	0.000135103	4.06349e-05	0.000104468	0.000157763	0.000116083	8.12306e-05	1.69028e-06	7.84385e-05	4.19985e-05	2.02212e-06	9.08191e-07	1.25567e-06	3.90132e-05	2.48632e-08	8.41121e-09	3.29492e-06	2.97411e-06	2.08796e-07	5.2659e-07	7.84158e-07	6.47661e-08	8.05781e-07	1.91021e-07	8.842e-08	2.68583e-07	5.11689e-07	3.76243e-08	5.08634e-08	2.01061e-07	1.14166e-07	6.9715e-08	1.39158e-07	6.22018e-09	3.1748e-08	2.64993e-08	6.12887e-10	1.81127e-08	7.15261e-08	1.15632e-09	8.05905e-09	5.88469e-09
	Var23	0.379245	0.368964	0.234394	0.0161232	0.000260716	6.89797e-07	5.57797e-06	4.53694e-05	9.299e-05	0.000642972	2.20101e-05	0.000126472	1.53824e-05	1.38565e-05	1.59e-05	6.32811e-06	3.26738e-08	2.80607e-06	1.34657e-08	2.5662e-07	7.58177e-07	7.08337e-06	4.04133e-08	1.94908e-08	1.78783e-08	3.84296e-07	5.61855e-06	2.81198e-07	5.03317e-06	1.33402e-11	4.17586e-08	4.66371e-08	2.14983e-06	3.15946e-07	7.71393e-08	5.5746e-08	2.31069e-07	5.73777e-08	4.86831e-08	7.68332e-08	4.83463e-08	2.98367e-10	3.74282e-08	2.40049e-09	7.34097e-08	3.90935e-09	7.21841e-09	1.81446e-11
	Var24	0.782797	0.108985	0.102878	0.00461026	0.000148339	1.30431e-06	2.10018e-06	4.17692e-06	1.62794e-06	0.000163688	3.54929e-05	0.000142569	3.47643e-05	1.05927e-05	2.50137e-05	9.54921e-05	1.88515e-07	5.54779e-07	8.7768e-06	1.77005e-05	4.91346e-06	8.76815e-07	1.81177e-05	1.84265e-06	1.22919e-06	1.26743e-06	3.65354e-06	1.90035e-06	9.86102e-07	2.18811e-07	3.77523e-08	5.56268e-07	1.22349e-07	4.54087e-09	1.64327e-07	1.42273e-09	4.05487e-07	1.59463e-08	6.71239e-08	2.87827e-07	1.77809e-07	8.69855e-09	1.81792e-09	2.14873e-08	4.40119e-08	3.62227e-08	4.35698e-09	5.71368e-09
	Var25	0.909472	0.0375167	0.0512206	0.00133205	0.000108555	6.64547e-07	7.42228e-07	4.57779e-09	6.20759e-06	9.44708e-06	0.000107922	5.70001e-06	0.00012613	4.78962e-07	6.3012e-07	1.92076e-05	1.26786e-06	1.94663e-07	2.06892e-05	1.5579e-06	2.46328e-06	1.23895e-05	1.12479e-05	3.14179e-06	7.50907e-07	1.47343e-07	9.25055e-06	1.35625e-06	2.70698e-06	3.88327e-07	6.32539e-08	1.48019e-06	2.72193e-06	2.09647e-08	7.87542e-08	4.16023e-07	7.0813e-09	2.08224e-08	5.13102e-07	3.31753e-10	1.04845e-07	8.55085e-10	1.37258e-09	7.4206e-08	1.23298e-08	7.31693e-08	7.52775e-08	1.09853e-08
	Var26	0.951903	0.0163467	0.0309081	0.000463691	6.82422e-05	2.40891e-07	5.18306e-08	2.51683e-06	3.8836e-06	2.04552e-07	0.000111835	1.46599e-05	0.000121128	1.10721e-08	1.01567e-05	2.20115e-06	6.03092e-06	4.74105e-08	1.7171e-05	1.64502e-06	2.10515e-07	3.97855e-06	3.04076e-07	1.28544e-07	1.31501e-07	3.47983e-08	1.89228e-07	3.82315e-07	5.07849e-06	9.43181e-07	2.05471e-07	4.43142e-06	7.32899e-07	2.0912e-08	4.12713e-07	7.75033e-09	3.28005e-07	9.33097e-09	9.94027e-09	2.39601e-07	7.97358e-08	4.51704e-10	1.35959e-08	6.0222e-08	2.32312e-07	5.01865e-08	1.02439e-07	6.1597e-09
	Var27	0.969492	0.00857228	0.0215182	0.000154375	2.68361e-05	6.37959e-07	2.52242e-06	4.68697e-06	9.52553e-07	4.65758e-08	6.09527e-05	2.93915e-05	7.55516e-05	8.50041e-07	8.01927e-06	1.12601e-05	1.02053e-05	5.5291e-06	3.49018e-06	3.02151e-06	4.04032e-06	8.61731e-07	5.72226e-06	6.31031e-07	2.84054e-07	1.17521e-08	2.17997e-06	2.82103e-07	7.27529e-07	8.28762e-09	3.45074e-07	1.39598e-06	1.51994e-10	2.80878e-07	1.0192e-08	7.55752e-07	2.20444e-07	1.56069e-08	1.08328e-06	7.74329e-09	7.25729e-08	4.10179e-08	1.12288e-07	8.55485e-08	6.30917e-08	8.21174e-08	1.87816e-07	2.76798e-09
	Var28	0.978043	0.00515963	0.0165912	4.12878e-05	1.50957e-06	1.33723e-06	4.2081e-06	2.69517e-06	5.67674e-08	2.99006e-08	2.82221e-05	1.8183e-05	4.20314e-05	9.49856e-07	6.90962e-06	1.0398e-05	1.25098e-05	7.68449e-06	1.63958e-09	8.35511e-07	8.29015e-06	5.87152e-06	1.87005e-06	1.12855e-06	1.27e-06	1.20369e-07	3.35432e-06	7.20553e-07	3.11278e-07	9.65664e-07	7.30895e-07	2.7751e-08	2.42161e-07	2.20967e-07	8.73576e-08	9.57585e-07	7.40552e-08	6.15183e-08	2.18758e-07	9.68505e-08	2.0706e-07	6.90252e-08	1.77485e-07	6.75214e-09	2.5831e-08	6.328e-08	1.20686e-07	1.82318e-09
	Var29	0.982813	0.00338175	0.0136729	3.09871e-06	2.12e-05	4.85011e-07	2.26096e-06	1.5678e-06	1.49123e-08	3.13261e-07	1.69197e-05	8.40231e-06	2.20276e-05	7.08639e-09	5.48701e-06	9.0156e-06	1.04426e-05	4.22996e-06	9.58151e-10	3.25107e-09	8.85346e-06	4.48389e-06	2.89104e-08	1.28298e-06	4.91926e-07	8.89835e-08	2.81473e-06	6.39492e-07	1.51889e-06	1.50573e-06	2.58931e-06	4.66264e-07	5.34665e-07	4.91121e-08	6.63422e-08	8.75696e-08	2.82965e-07	4.72847e-08	1.51515e-07	8.08727e-08	9.23764e-08	2.85632e-09	3.83205e-09	9.35941e-09	6.48892e-08	9.12226e-10	1.74401e-07	3.78422e-09
	Var30	0.985689	0.00225832	0.0118193	1.16109e-05	0.000159194	1.3758e-07	8.86564e-07	1.31153e-06	2.62241e-08	6.73198e-07	9.94042e-06	5.05264e-06	9.81839e-06	1.65126e-07	1.77601e-06	7.1816e-06	3.80292e-06	3.3893e-06	2.90646e-08	1.14086e-08	5.52396e-06	1.80022e-06	4.7393e-07	2.38891e-06	5.76927e-08	1.05923e-08	1.78765e-06	4.82325e-08	1.14572e-06	1.88305e-06	2.71712e-06	6.97082e-08	1.49236e-07	1.9506e-09	9.58021e-08	1.71961e-10	1.2201e-08	4.51692e-08	1.55001e-07	2.49661e-09	3.81475e-08	8.88234e-08	2.12103e-07	4.28771e-09	4.81009e-08	3.07375e-10	1.28047e-08	4.32644e-08
	Var31	0.987404	0.00142612	0.0105746	9.32318e-05	0.000471265	1.49494e-06	5.30277e-07	1.29145e-06	3.62816e-08	1.33892e-07	4.05696e-06	1.5923e-06	3.46339e-06	4.0042e-09	7.71715e-08	3.09509e-06	2.75855e-07	2.58075e-06	4.50232e-08	6.70619e-07	1.77795e-06	4.72576e-07	1.49087e-07	3.19838e-06	5.23492e-07	8.62526e-09	2.97597e-07	4.18178e-11	2.60595e-07	2.13805e-06	5.46903e-07	1.24026e-07	8.00809e-08	3.02604e-10	2.92603e-07	3.19565e-08	4.61941e-08	7.18443e-08	1.24865e-08	1.17913e-07	6.19901e-08	1.97076e-07	2.6918e-07	1.08348e-08	1.09506e-07	1.52916e-11	4.04335e-08	1.27319e-07
	Var32	0.988249	0.0008024	0.00968433	0.000283685	0.000959747	6.25572e-06	2.06069e-07	1.96045e-06	2.15862e-07	2.40159e-07	9.53156e-07	8.2087e-08	9.27993e-07	1.06803e-08	5.38522e-09	4.20549e-07	2.03341e-07	2.79698e-07	7.58295e-07	1.84689e-06	1.61293e-07	1.25672e-09	4.38742e-09	2.06386e-06	1.86372e-07	7.74819e-08	1.30802e-07	8.10363e-09	8.22395e-08	1.74318e-06	4.22083e-09	3.51808e-07	2.86849e-07	3.89725e-09	5.96034e-07	7.74302e-08	2.74309e-11	1.56785e-08	5.35105e-09	4.96975e-07	2.72431e-09	6.35458e-08	4.97572e-08	1.13126e-09	3.1105e-07	7.17042e-08	2.43903e-09	2.07177e-10
	Var33	0.988263	0.000381668	0.00912494	0.000599301	0.0015977	1.04212e-05	9.04533e-08	3.56362e-06	8.78596e-07	1.17534e-06	1.41659e-07	3.19833e-06	5.83888e-08	1.36101e-07	1.89786e-08	6.61965e-09	8.93043e-07	3.1217e-07	3.51389e-06	2.31506e-06	6.97652e-08	5.31753e-07	1.4908e-07	1.63213e-06	1.87432e-07	2.33793e-07	1.16897e-06	9.02967e-09	3.72903e-08	7.11108e-07	1.22507e-08	3.15452e-07	5.27358e-09	1.14562e-07	6.18149e-07	2.03339e-08	3.66054e-07	9.54962e-09	1.20203e-09	5.85336e-08	2.3709e-07	2.84481e-10	3.04934e-08	1.60886e-09	2.20359e-07	1.00507e-07	2.05267e-08	9.21528e-08
	Var34	0.987683	0.000141354	0.00882637	0.00101757	0.00227713	1.16451e-05	1.81853e-07	4.66567e-06	2.68409e-06	1.34079e-06	6.14889e-09	7.99924e-06	2.77999e-07	6.29923e-07	1.06369e-07	3.621e-07	9.19931e-07	4.29589e-07	8.29378e-06	2.19011e-06	3.44755e-07	1.63108e-06	2.57634e-07	2.42598e-06	1.65791e-06	2.84951e-07	2.2208e-06	2.6466e-07	6.9634e-08	1.72883e-07	1.55843e-08	2.18596e-07	5.55684e-07	3.92672e-07	1.6341e-07	4.50382e-08	1.04599e-06	5.22003e-09	1.09522e-07	7.19385e-07	4.70147e-07	2.54514e-08	2.75985e-08	4.65485e-09	1.8495e-08	2.73551e-08	1.10405e-11	9.62083e-09
	Var35	0.986961	3.01133e-05	0.00864979	0.00143484	0.00286444	9.20291e-06	4.36466e-07	3.97714e-06	6.38353e-06	1.22932e-06	2.89035e-09	8.66084e-06	1.18605e-06	4.42536e-07	2.44337e-08	6.7939e-07	4.14956e-07	3.5275e-09	9.38815e-06	1.56872e-06	6.0757e-07	2.47548e-06	2.03355e-07	1.76019e-06	2.37318e-06	2.3183e-07	1.76047e-06	1.32372e-06	8.16716e-07	1.76084e-07	5.19644e-09	1.18424e-08	8.05908e-07	5.6595e-07	2.42147e-09	3.94828e-07	7.46611e-07	1.20238e-07	1.18124e-07	1.36085e-06	6.3704e-09	3.13211e-08	4.13976e-08	1.65099e-09	2.85818e-09	3.65786e-10	3.41867e-08	1.19144e-08
	Var36	0.986343	1.26186e-07	0.00861532	0.00172612	0.00326849	5.07394e-06	1.33598e-06	3.05189e-06	8.76361e-06	2.20877e-06	5.92594e-09	3.77489e-06	1.53321e-06	1.04518e-08	1.49822e-07	7.19114e-08	1.11553e-07	2.43596e-07	6.09548e-06	9.97793e-07	9.60821e-07	1.9141e-06	1.00102e-08	2.42117e-07	1.95026e-06	1.79155e-07	9.87591e-07	2.77161e-06	1.40125e-06	1.77506e-07	1.91598e-07	3.47133e-07	5.30784e-10	1.70573e-07	2.30393e-08	6.99207e-07	7.24801e-08	7.37052e-07	2.17581e-09	2.60765e-07	5.96234e-07	4.48249e-10	2.01162e-07	1.26784e-08	3.95983e-10	7.84851e-10	3.99922e-08	1.10001e-09
	Var37	0.985906	9.41828e-06	0.00874882	0.00190226	0.00338996	3.20715e-06	4.71846e-06	3.21212e-06	8.13272e-06	4.92354e-06	1.74971e-07	6.53066e-07	1.15785e-06	3.13746e-07	7.42992e-07	1.06416e-07	3.56834e-07	4.99472e-07	2.69737e-06	3.60633e-07	1.00967e-06	1.05781e-06	7.23433e-07	7.38505e-09	1.67013e-06	2.31086e-08	7.82672e-07	1.66752e-06	1.37185e-06	1.49639e-08	2.36885e-07	1.30448e-06	2.97877e-07	4.02158e-07	4.95656e-09	3.3874e-07	2.38047e-08	2.33543e-07	6.90266e-08	1.80037e-07	8.81665e-07	2.13445e-08	1.77247e-07	2.75717e-08	3.83516e-08	4.10129e-08	2.12345e-10	1.29863e-09
	Var38	0.985871	2.10961e-05	0.00890889	0.00197477	0.00316614	3.96076e-06	1.24253e-05	3.62348e-06	8.65634e-06	6.32253e-06	9.57592e-07	1.01653e-06	2.82757e-07	1.13227e-06	1.02735e-06	5.61385e-08	1.12577e-06	7.31503e-07	1.68464e-06	7.09075e-08	8.67069e-07	2.04016e-06	3.49309e-06	1.27093e-08	1.14387e-06	3.27486e-08	7.77068e-08	8.37558e-08	9.97928e-07	1.38775e-08	1.02704e-08	1.44804e-06	3.48125e-09	2.53087e-06	1.28021e-07	9.3771e-12	2.33674e-08	3.07874e-07	2.11418e-07	9.45131e-07	9.27433e-08	3.33471e-09	9.0949e-08	9.96722e-09	1.06881e-07	2.87842e-10	3.89895e-09	1.11449e-09
	Var39	0.986445	1.8873e-05	0.00889309	0.00182801	0.00274734	5.6057e-06	1.83838e-05	3.97925e-06	8.25153e-06	2.99425e-06	3.10459e-06	3.35509e-06	2.3541e-09	3.33227e-07	1.67511e-07	2.00364e-09	4.10392e-07	7.36641e-07	2.56423e-06	6.65012e-07	4.27632e-07	4.33062e-06	2.64556e-06	5.91439e-07	6.51409e-07	7.04027e-07	8.20468e-07	3.09524e-08	1.77648e-08	1.38882e-07	1.09061e-08	8.8629e-07	4.44339e-09	3.37855e-06	6.0808e-07	2.83828e-09	1.48772e-07	1.09451e-06	5.59096e-08	8.69094e-08	4.63714e-08	1.23441e-09	1.18676e-11	2.80564e-08	3.06991e-08	9.76857e-08	3.82186e-08	1.08351e-08
	Var40	0.987406	7.67801e-06	0.00868344	0.00148815	0.0023555	7.27204e-06	1.62975e-05	4.33086e-06	1.8253e-06	4.07125e-07	6.25588e-06	1.92154e-06	1.5921e-07	3.16536e-07	1.88557e-07	2.83064e-07	1.48631e-08	2.0073e-07	4.27151e-06	4.5739e-07	2.50004e-07	2.038e-06	4.85773e-09	7.94359e-07	1.24804e-06	1.16187e-06	1.42132e-06	3.13219e-09	9.56963e-07	2.20087e-06	4.90905e-08	1.69494e-07	3.62449e-08	1.4683e-06	5.88756e-08	3.11356e-07	1.48861e-07	6.86474e-07	1.61893e-06	1.93855e-07	1.61497e-09	5.84445e-07	3.43775e-08	8.34519e-12	5.0893e-11	3.25449e-10	2.44388e-08	4.63746e-08
	Var41	0.988389	1.82424e-07	0.00838813	0.00114131	0.00199751	1.05362e-05	1.69399e-05	4.53405e-06	9.30878e-08	3.45412e-07	7.30954e-06	3.4431e-08	2.46207e-07	5.77298e-06	1.33093e-07	1.06936e-06	1.45673e-08	6.07736e-06	5.84376e-06	1.4357e-06	9.97034e-08	2.18241e-08	4.52116e-06	2.09013e-08	3.07535e-06	6.61911e-08	1.57396e-08	3.19929e-08	8.77949e-07	9.78064e-06	8.31412e-07	5.40747e-08	9.81655e-08	1.34818e-08	6.84564e-07	2.59194e-07	7.55591e-07	2.13137e-08	9.08473e-07	4.62819e-08	1.51011e-08	7.97355e-07	3.64261e-09	7.23347e-08	2.55619e-08	3.43685e-08	7.35435e-08	1.09721e-08
	Var42	0.989503	3.60357e-05	0.00783941	0.000890907	0.00162132	1.2267e-05	2.43672e-05	5.52455e-06	1.48483e-10	5.18704e-07	3.80848e-06	2.2524e-06	4.19898e-08	9.20422e-06	3.34742e-08	8.17975e-07	2.70527e-07	5.583e-06	5.53907e-06	6.53064e-06	4.6105e-08	5.78013e-08	1.06101e-05	2.02061e-06	1.82718e-06	3.63406e-07	2.98561e-07	1.40991e-10	2.22976e-07	1.12049e-05	1.29581e-06	5.68042e-07	1.63363e-06	2.34878e-07	8.45876e-07	2.52513e-07	2.08642e-07	2.62946e-07	1.78912e-08	2.62812e-07	1.36402e-07	1.02452e-09	5.4373e-08	7.04166e-08	1.89244e-08	1.79599e-09	5.64025e-09	6.60809e-09
	Var43	0.99082	0.000187501	0.00693333	0.000775821	0.00119465	1.02157e-05	2.31261e-05	4.43544e-06	8.71201e-09	9.00413e-08	4.61008e-07	3.22924e-06	1.63884e-06	8.4526e-07	3.40904e-07	5.12252e-08	3.34501e-09	6.76268e-07	5.05021e-06	1.22158e-05	3.17021e-06	1.06128e-07	4.61904e-06	2.23941e-06	4.39666e-07	5.96312e-07	5.00303e-08	4.86136e-09	2.15263e-06	6.18674e-06	1.14505e-07	1.99681e-06	1.52748e-06	7.93605e-08	1.91992e-09	1.26697e-06	1.17048e-08	3.555e-07	6.13939e-07	1.002e-07	5.02052e-09	1.82247e-07	3.96927e-08	1.8999e-07	2.00704e-08	5.78941e-09	4.86733e-08	7.56907e-10
	Var44	0.991733	0.000617019	0.00601626	0.000739988	0.000811543	8.90307e-06	1.77316e-05	1.26722e-06	1.58959e-06	9.2502e-08	9.53329e-08	2.94239e-06	3.3253e-06	7.07272e-07	5.93875e-07	4.18438e-07	5.55519e-08	3.38374e-07	4.19648e-06	1.12469e-05	6.64534e-06	3.30887e-07	1.09414e-07	1.8737e-06	6.83346e-07	1.18915e-06	1.0808e-06	2.29396e-09	1.2541e-06	3.65993e-06	3.91551e-06	3.96363e-06	3.37037e-08	1.84354e-07	1.22661e-06	6.75553e-07	3.63071e-08	9.12637e-08	2.92114e-07	2.5225e-07	3.30614e-07	2.76688e-07	2.44747e-07	1.08447e-07	2.87525e-08	1.87214e-08	3.72603e-08	1.39151e-09
	Var45	0.991738	0.00151136	0.00538349	0.000664054	0.000641061	8.41687e-06	1.71094e-05	3.19393e-07	2.20534e-06	1.39108e-06	1.53081e-07	3.44184e-06	5.12035e-07	1.09591e-06	7.00576e-07	1.30689e-06	2.42282e-07	4.26711e-08	2.49988e-06	5.92201e-06	1.56295e-06	4.55486e-07	6.99706e-09	2.84053e-06	2.52839e-07	2.61729e-06	1.02865e-06	1.99174e-08	2.78617e-08	1.0248e-06	2.2623e-06	1.8687e-06	1.01761e-09	2.94381e-07	6.03599e-07	1.56017e-09	1.46337e-07	2.6261e-09	8.42697e-09	6.80775e-08	1.55541e-07	1.48134e-08	9.37677e-07	9.94359e-08	2.48724e-09	5.33866e-08	3.09795e-08	2.7162e-11
	Var46	0.991143	0.00256452	0.0050521	0.000534217	0.000652856	4.54493e-06	1.46436e-05	6.04626e-07	7.92392e-09	2.05802e-06	3.93978e-07	4.16533e-06	2.41817e-06	1.56705e-06	8.63781e-07	1.60769e-06	1.51405e-06	1.39881e-06	3.89164e-06	2.63384e-06	1.8173e-07	3.25931e-07	1.25829e-07	1.45626e-06	1.03787e-08	2.56692e-06	8.17181e-07	4.10228e-07	4.29011e-07	2.04341e-07	5.89142e-07	2.06265e-07	1.89406e-07	1.00474e-06	8.58774e-08	8.69118e-07	2.38636e-07	4.66316e-08	3.59709e-08	1.65144e-07	2.84112e-08	1.97442e-07	3.8266e-07	4.36427e-11	3.91064e-07	2.50846e-08	7.07251e-09	8.00182e-10
	Var47	0.990608	0.00322819	0.00490645	0.000439782	0.000755263	5.84999e-07	7.7392e-06	4.40975e-07	2.91884e-06	9.83822e-07	3.46801e-06	5.77709e-06	6.7364e-06	2.46722e-06	1.03109e-06	2.95606e-06	2.41123e-06	3.98912e-06	5.8517e-06	7.79425e-07	7.65995e-08	1.8901e-08	8.56104e-07	2.25379e-07	2.51078e-08	1.29441e-06	1.53393e-06	3.21383e-06	4.1835e-07	2.52492e-07	9.05096e-07	3.16275e-06	8.08786e-08	1.10009e-07	3.82464e-08	6.84281e-07	2.3855e-07	3.07039e-08	3.88422e-07	5.78878e-08	2.31623e-07	1.10553e-08	2.12986e-09	4.31712e-08	2.77634e-07	2.43689e-10	5.13941e-09	7.8351e-09
	Var48	0.990421	0.00338433	0.00472264	0.000445831	0.000964062	4.2794e-08	2.36266e-06	1.12801e-07	8.04144e-06	8.64138e-08	5.87504e-06	6.56705e-06	5.50577e-06	2.04314e-06	1.08837e-06	5.30978e-06	1.44902e-06	4.80368e-06	3.05073e-06	5.33011e-08	1.46976e-06	4.1799e-09	1.23735e-06	1.46676e-08	5.73042e-13	6.09996e-07	2.25048e-06	4.09256e-06	3.48838e-08	2.53373e-08	7.74115e-07	3.31771e-06	2.25736e-07	7.57837e-08	1.09235e-07	4.47418e-08	2.71332e-08	1.00478e-07	1.32126e-07	1.28109e-07	2.38986e-07	1.97863e-07	1.57512e-07	3.35003e-08	1.73709e-08	7.78132e-08	3.68334e-09	4.81823e-09
	Var49	0.990488	0.00314902	0.00441491	0.000597131	0.00131015	1.58219e-06	1.01432e-06	1.42892e-07	7.00697e-06	4.82839e-08	4.27414e-06	2.32797e-06	2.09062e-06	6.87546e-07	3.83508e-07	4.2494e-06	4.19076e-07	3.8024e-06	1.47409e-06	1.64471e-09	9.5432e-07	5.61949e-08	4.38748e-07	4.93242e-07	2.61e-07	2.55095e-07	1.58879e-06	1.54577e-06	9.42593e-09	2.19255e-07	3.88794e-07	1.77452e-06	1.45737e-06	3.01517e-07	2.02123e-08	6.49234e-07	1.89784e-08	2.30022e-07	2.69798e-08	2.40411e-09	3.14448e-07	2.18972e-07	3.79454e-08	2.61018e-09	5.12045e-09	2.71245e-08	4.36727e-12	7.97761e-09
	Var50	0.990503	0.00261255	0.00407175	0.00105119	0.00173131	1.18763e-05	1.5794e-06	8.13172e-08	2.06896e-06	1.44382e-07	7.32201e-07	7.32851e-07	4.53754e-08	3.72596e-10	1.5562e-07	1.00168e-06	2.10496e-09	4.90262e-07	2.43302e-06	3.60424e-10	1.16317e-07	8.34225e-08	1.09065e-07	1.05451e-06	9.49002e-07	4.02835e-09	3.25329e-07	1.77744e-08	3.80421e-10	1.38418e-06	2.58703e-07	7.45623e-07	1.68239e-06	2.51396e-07	2.35894e-07	4.0506e-07	2.15329e-08	1.68844e-07	6.82361e-08	1.21426e-07	2.55196e-07	8.72841e-08	5.20078e-08	2.5914e-08	3.38408e-08	2.16932e-08	6.86084e-09	2.04102e-08
	Var51	0.989866	0.00194648	0.00371732	0.00222017	0.00217031	3.41664e-05	3.81543e-06	1.5622e-07	8.37611e-10	2.50464e-07	6.19424e-07	1.06354e-05	4.91104e-06	4.07418e-07	2.7998e-06	1.19202e-08	1.55344e-07	1.73096e-06	4.60626e-06	1.079e-07	2.22394e-06	1.4014e-06	2.03397e-06	9.80773e-07	1.21767e-06	1.02311e-07	1.86524e-07	4.95817e-07	1.3506e-07	3.33137e-06	5.92189e-08	8.18109e-08	1.00608e-06	7.11461e-09	6.12885e-07	1.80259e-07	4.52939e-08	1.00683e-08	7.62492e-08	1.4189e-07	8.15605e-09	8.48059e-08	2.11473e-07	4.43653e-08	9.40443e-08	7.72019e-08	2.47453e-10	5.7139e-10
	Var52	0.987738	0.00142081	0.00326666	0.00472841	0.00269801	5.59837e-05	1.05742e-05	2.04934e-06	3.25694e-07	1.53295e-07	4.35078e-06	1.77012e-05	1.48164e-05	3.96624e-07	6.85315e-06	9.6003e-07	3.9791e-07	7.17558e-06	4.28498e-06	4.45573e-07	3.65457e-06	2.20738e-06	4.41489e-06	2.05327e-07	1.45274e-06	1.47643e-07	1.66461e-06	1.35193e-06	2.52306e-07	3.66746e-06	5.11774e-09	5.79809e-08	6.73701e-07	1.77523e-07	2.39113e-07	2.49047e-07	2.73639e-07	6.84327e-08	2.45625e-08	6.83156e-08	3.48618e-08	2.70834e-08	4.61117e-08	2.8168e-10	1.36375e-07	4.33059e-08	2.0689e-08	1.2515e-08
	Var53	0.983766	0.00135486	0.00254174	0.00869585	0.00347416	5.80251e-05	2.82758e-05	6.81061e-06	3.07529e-08	3.98337e-08	8.17447e-06	9.01622e-06	2.25451e-05	5.86944e-08	8.91245e-06	1.79103e-06	1.13019e-06	4.76604e-06	2.12938e-07	6.36976e-07	1.84222e-06	8.08097e-07	3.29091e-06	6.01232e-08	2.5735e-06	9.66056e-09	2.03809e-06	1.50829e-06	1.50489e-07	2.13031e-06	2.82719e-08	2.013e-07	3.26506e-07	5.53047e-07	6.95733e-10	3.92073e-07	4.75019e-07	7.22628e-08	3.69909e-09	1.88051e-08	2.74243e-09	3.32609e-08	1.35956e-07	1.52886e-07	8.55017e-08	1.22635e-10	4.60696e-10	1.13843e-08
	Var54	0.978932	0.00244579	0.00139181	0.012531	0.00452026	3.99193e-05	5.62915e-05	1.24095e-05	1.90036e-06	6.20805e-07	1.37562e-05	3.36018e-08	2.3159e-05	1.8772e-08	9.71394e-06	8.48415e-07	2.89279e-06	4.74263e-08	6.73805e-06	7.21304e-07	3.96806e-08	1.27882e-07	1.70566e-07	1.80585e-07	4.35916e-06	7.15702e-08	7.90635e-07	8.0138e-07	4.92937e-08	6.78113e-07	1.96223e-08	3.74915e-07	2.70952e-09	4.95743e-07	1.31169e-07	1.96437e-07	2.84888e-07	2.07049e-08	1.64317e-09	1.52948e-08	2.11519e-08	8.55261e-08	3.73493e-07	2.38795e-07	4.63046e-09	1.60808e-09	3.86778e-08	2.1059e-08
	Var55	0.973581	0.00730041	0.00018607	0.0131054	0.00560699	2.01108e-05	7.24898e-05	1.44437e-05	3.35042e-06	6.06512e-07	2.20535e-05	7.67842e-06	1.61813e-05	7.03334e-08	8.55081e-06	2.10294e-07	4.36673e-06	2.69272e-06	3.04413e-05	8.99404e-07	3.37923e-06	2.88785e-06	1.5687e-06	5.13717e-08	5.0019e-06	1.52242e-07	3.60983e-08	3.00631e-07	2.64865e-09	3.12112e-09	2.07964e-12	7.3753e-07	2.78429e-07	2.7471e-07	1.93542e-07	1.22521e-08	5.12383e-08	2.31341e-07	1.95342e-08	1.34857e-07	2.56427e-08	3.2235e-10	7.85202e-08	3.73545e-08	2.94238e-09	6.8506e-09	2.56171e-08	1.71304e-08
	Var56	0.96039	0.0237116	0.000613653	0.00845498	0.00662058	9.41021e-06	4.39481e-05	1.51587e-05	1.62164e-06	1.84403e-08	2.7901e-05	2.36679e-05	4.96413e-06	1.80009e-08	3.39059e-06	1.3962e-07	3.37567e-06	4.07607e-06	4.65951e-05	9.17159e-07	5.84131e-06	6.71435e-06	4.14954e-06	2.62975e-07	3.50158e-06	8.21899e-08	1.37309e-07	2.41405e-07	4.2939e-10	2.60978e-07	6.89765e-08	5.3917e-07	5.07273e-07	2.32817e-07	2.46939e-07	5.71613e-07	3.02578e-09	5.15962e-08	1.60039e-07	3.24063e-08	6.05798e-10	7.76847e-08	2.72746e-08	5.04072e-08	9.41964e-10	2.87388e-10	1.00872e-09	2.93744e-08
	Var57	0.9165	0.067547	0.00640451	0.00166318	0.00774197	6.36694e-06	1.97565e-07	1.66499e-05	3.98201e-08	4.00752e-06	2.64521e-05	2.6987e-05	4.4751e-07	9.21878e-07	1.83169e-09	2.04889e-09	5.78582e-07	1.45731e-07	4.03749e-05	2.79009e-07	2.22757e-06	9.23387e-06	2.4529e-06	1.69844e-06	8.43218e-07	8.12249e-08	5.98253e-07	4.00175e-07	9.29386e-08	1.12382e-07	1.05925e-07	2.10783e-08	4.69721e-08	3.42812e-08	3.09953e-07	1.21513e-06	3.59906e-09	1.61515e-07	2.99679e-08	1.85312e-08	2.03207e-08	2.97083e-08	7.78121e-08	2.94102e-07	1.17444e-10	2.38051e-09	2.13509e-08	1.78681e-09
	Var58	0.811004	0.157046	0.0216698	0.000963271	0.00909527	7.96157e-06	8.08413e-05	1.53024e-05	5.20958e-06	1.72654e-05	1.67523e-05	9.94541e-06	1.34952e-05	3.23145e-06	4.01828e-06	1.70104e-07	2.78934e-07	6.7022e-06	1.99046e-05	3.59364e-08	2.87543e-07	7.93872e-06	1.38299e-08	3.60656e-06	1.83431e-07	2.29366e-06	6.43559e-07	5.64777e-07	1.08488e-06	1.07238e-07	4.97377e-08	1.35187e-06	2.68368e-07	2.84136e-07	5.40602e-08	6.57211e-07	7.14029e-09	5.23481e-07	5.34213e-08	3.97055e-09	7.22513e-09	1.38116e-09	1.62811e-08	1.65727e-07	4.11462e-10	3.12096e-10	2.88349e-08	7.58882e-10
	Var59	0.638012	0.294881	0.0458105	0.0104112	0.0104088	1.07149e-05	0.000320674	8.59385e-06	1.66091e-05	2.6016e-05	3.80532e-06	3.11634e-09	2.38177e-05	3.84609e-06	9.33984e-06	3.90515e-07	1.00047e-06	2.25699e-05	3.09577e-06	2.33344e-07	5.3735e-06	1.82806e-06	1.75258e-06	3.65239e-06	1.96326e-06	5.76945e-06	9.09146e-08	3.23187e-07	1.84299e-06	5.40481e-07	2.82862e-08	1.30638e-06	2.07208e-07	5.72767e-07	3.17666e-08	7.2632e-09	5.5995e-09	1.39672e-07	2.51559e-08	3.93392e-08	3.55168e-08	3.32939e-11	4.02891e-09	4.10313e-08	7.17981e-12	3.12296e-09	4.20188e-12	1.51787e-08
	Var60	0.429512	0.464083	0.0730572	0.0219124	0.0108619	9.09339e-06	0.000480411	2.07167e-06	1.91674e-05	1.07152e-05	1.30408e-06	4.09373e-06	1.12027e-05	1.16226e-06	5.26846e-06	4.36424e-07	3.10121e-07	1.50733e-05	1.41997e-07	5.79608e-08	4.64224e-06	4.99191e-07	2.30604e-06	7.2619e-07	1.39104e-06	2.53415e-06	7.21985e-08	4.70306e-08	2.64035e-07	3.23116e-07	2.03558e-09	2.16521e-08	1.94836e-07	2.39965e-08	1.11896e-09	1.1519e-07	3.88181e-08	4.22581e-08	5.02602e-09	4.03557e-08	3.31002e-09	2.31431e-10	4.96942e-09	2.68333e-07	7.54568e-09	1.35662e-08	6.95778e-09	2.05787e-10
	Var61	0.229504	0.639767	0.0971564	0.0238637	0.00934177	3.28704e-06	0.000327433	3.12961e-08	5.08912e-06	1.24248e-06	1.6518e-05	4.99652e-06	7.50767e-08	2.92691e-08	2.14813e-08	4.3106e-08	8.41172e-08	3.32e-08	8.98691e-07	6.48654e-09	4.8328e-08	3.07875e-06	9.83426e-08	1.17912e-06	5.51735e-09	1.73669e-07	1.87372e-07	2.60423e-08	9.10656e-07	2.39957e-09	1.71718e-08	4.76158e-07	7.87233e-07	1.74115e-07	2.79705e-08	8.64749e-08	8.29832e-10	2.26435e-07	2.91999e-08	2.12468e-09	1.03655e-08	3.87262e-11	1.86707e-09	1.60151e-08	1.43347e-08	4.19199e-08	1.41984e-08	3.2681e-08
	Var62	0.0805894	0.787428	0.111462	0.0146316	0.00572804	2.27394e-08	4.87041e-05	7.89314e-08	1.84841e-06	2.77626e-05	2.95968e-05	1.2149e-06	1.3424e-05	1.16899e-06	2.7984e-06	1.13546e-07	1.21811e-06	1.2166e-05	6.66981e-07	5.39289e-08	2.2805e-06	1.98048e-06	8.92513e-07	5.50118e-06	1.46875e-06	3.07621e-06	3.25688e-08	1.76494e-07	2.55269e-06	1.02782e-07	2.49073e-08	7.19134e-07	3.17846e-07	3.18947e-07	6.92045e-09	3.06956e-08	6.23864e-08	2.31918e-07	2.96479e-09	3.86446e-08	1.13938e-08	2.49929e-10	3.30678e-09	8.43709e-08	6.02082e-09	4.55613e-09	1.85639e-08	5.69174e-09
	Var63	0.00847826	0.87555	0.109732	0.00401851	0.00199749	6.70325e-06	5.83786e-05	3.32257e-07	2.11488e-05	4.66247e-05	2.39977e-05	5.97703e-08	1.74974e-05	2.31172e-06	4.72743e-06	2.44144e-07	1.52057e-06	2.36297e-05	2.07024e-06	1.70943e-08	3.40952e-06	2.88922e-07	1.04784e-06	3.17448e-06	1.8209e-06	3.17008e-06	1.04191e-09	8.14564e-08	8.95708e-07	1.53651e-07	1.24165e-08	2.88563e-07	8.83309e-10	9.77445e-08	1.35587e-07	1.46872e-08	1.08354e-07	2.34675e-09	7.44949e-09	4.91205e-09	1.03572e-09	1.50528e-08	2.38954e-09	4.93402e-08	2.02671e-08	4.82405e-08	1.97229e-09	2.44309e-08
	Var64	0.00600904	0.901893	0.0912899	4.09339e-05	0.000165353	2.47426e-05	0.000441107	4.43119e-06	4.7477e-05	3.84459e-05	8.6457e-06	1.26771e-06	4.61587e-06	1.68903e-06	3.51137e-06	5.00033e-07	1.64791e-07	1.40984e-05	6.26117e-06	5.05852e-08	1.10063e-06	7.10677e-08	1.04337e-07	3.19853e-08	4.77953e-07	1.23428e-06	5.51956e-09	1.92615e-10	5.16859e-08	2.18383e-07	1.97613e-07	2.42492e-08	7.48028e-07	2.6317e-08	2.82237e-08	1.32555e-08	4.28177e-09	4.62465e-07	9.05836e-11	4.31125e-09	7.18367e-08	2.84198e-08	3.24695e-10	5.11917e-09	1.55531e-09	1.32108e-08	3.59386e-08	1.14541e-08
	Var65	0.0484416	0.886962	0.0622618	0.00112383	0.000156812	4.66382e-05	0.000890308	7.98395e-06	6.83334e-05	2.04946e-05	2.77276e-07	1.682e-06	2.57619e-07	1.94207e-07	1.06656e-06	6.68641e-07	6.78954e-07	1.27786e-06	6.77481e-06	6.03184e-07	5.33208e-10	6.81973e-07	1.20075e-07	1.34977e-06	1.15861e-08	1.96276e-07	1.28822e-08	1.30264e-08	1.41299e-06	3.84047e-07	5.20833e-07	6.78972e-09	1.82653e-06	6.85435e-08	1.11419e-07	2.5219e-09	1.53007e-07	1.94015e-07	3.47132e-09	3.40098e-10	6.23563e-08	9.24647e-10	1.04605e-08	2.27273e-08	8.92015e-10	6.5062e-09	1.84639e-08	2.62661e-09
	Var66	0.114683	0.84826	0.03197	0.00294087	0.000832489	6.73549e-05	0.00112489	5.97326e-06	7.97884e-05	6.01207e-06	1.93617e-06	2.29452e-07	9.95572e-06	2.63221e-07	2.36513e-07	7.96297e-08	2.66732e-06	2.00799e-06	1.9714e-06	1.39584e-06	1.00409e-06	1.0834e-06	4.04916e-07	2.36781e-06	6.94894e-07	4.46907e-10	1.49956e-09	1.85351e-10	1.75226e-06	2.58608e-07	2.56391e-07	5.5627e-08	8.85516e-07	3.36823e-09	1.03232e-07	1.15824e-08	1.96813e-07	5.60737e-08	2.88365e-08	2.34928e-08	7.5693e-09	8.10334e-08	5.67691e-09	2.2556e-11	1.76928e-08	5.22409e-08	5.09405e-09	6.95118e-10
	Var67	0.187417	0.796156	0.00993807	0.00388061	0.00134916	7.41936e-05	0.00103981	3.3716e-06	8.10529e-05	1.78213e-07	5.54774e-06	6.32256e-07	2.94051e-05	1.73317e-06	3.99855e-06	2.46163e-07	2.82353e-06	7.40413e-06	3.57093e-11	5.58612e-07	3.27669e-06	8.24166e-07	4.74142e-07	5.7199e-07	1.56395e-06	2.54989e-07	1.37456e-10	1.98916e-09	1.55323e-07	3.50046e-09	1.84949e-08	5.13405e-08	4.70306e-08	2.46456e-08	2.41486e-08	2.52117e-08	2.84127e-08	2.71329e-07	1.01959e-08	1.15688e-08	3.61582e-08	3.4658e-08	9.23567e-09	8.12413e-10	1.03252e-09	5.78656e-13	5.64395e-10	2.65757e-09
	Var68	0.250573	0.742221	0.00065767	0.00423039	0.00145358	4.88651e-05	0.000666484	1.9095e-06	6.3921e-05	1.26846e-06	4.37668e-06	3.02461e-06	4.21554e-05	3.60222e-06	7.19417e-06	7.30606e-07	1.11074e-06	8.14072e-06	6.86664e-07	6.48444e-08	4.44407e-06	3.85712e-08	6.08424e-07	4.0717e-07	5.14063e-07	1.61666e-06	3.11348e-08	1.06878e-07	7.25657e-07	6.39633e-07	8.05449e-08	7.2718e-09	1.71304e-07	8.84147e-10	5.3614e-08	3.79183e-10	1.95476e-09	1.35315e-07	1.36953e-07	1.02488e-08	4.37158e-09	3.58845e-08	1.20261e-08	2.2636e-08	6.08306e-08	1.22616e-07	4.64575e-08	1.62184e-08
	Var69	0.296102	0.696741	0.00109173	0.00447609	0.00123475	1.41125e-05	0.000230379	1.00921e-06	2.74082e-05	2.37839e-06	4.06401e-07	5.76126e-06	3.62856e-05	3.7429e-06	5.92712e-06	1.31776e-06	5.95191e-09	5.3022e-06	1.31627e-06	6.25186e-07	2.62606e-06	1.44601e-06	6.56107e-07	3.97318e-06	4.26913e-07	2.78614e-06	7.30378e-08	2.88373e-07	2.05095e-06	1.27244e-06	7.99731e-07	4.17211e-09	1.40263e-06	1.30489e-08	2.54566e-09	1.08481e-08	8.14318e-08	2.05441e-10	2.08088e-08	8.76227e-08	6.70839e-09	4.59177e-08	2.81737e-10	1.23778e-08	1.45179e-08	2.06029e-08	8.98805e-08	3.07024e-08
	Var70	0.325758	0.663122	0.00514079	0.00499117	0.000910964	5.44228e-08	5.98374e-06	9.8253e-07	5.5791e-07	7.47106e-07	1.295e-06	7.65256e-06	2.18035e-05	2.46019e-06	2.44627e-06	3.01221e-06	3.30405e-07	1.98859e-06	5.92786e-07	4.88103e-07	5.45727e-08	6.34326e-06	6.64713e-07	7.54082e-06	1.74744e-06	1.63194e-06	6.95165e-08	3.15136e-07	1.48032e-06	6.41519e-07	2.18408e-06	4.64103e-10	3.39695e-06	5.87903e-08	6.48643e-09	7.0782e-09	1.36625e-07	1.40188e-07	9.27266e-08	6.01022e-08	4.30599e-08	6.74802e-10	4.53616e-13	1.27122e-07	6.29904e-08	9.94827e-08	9.0769e-10	2.74255e-10
	Var71	0.346826	0.638234	0.00822006	0.00590011	0.000633176	9.12368e-06	0.000101703	1.91985e-06	1.95267e-05	2.40427e-09	6.90542e-06	7.35034e-06	1.02299e-05	1.14108e-06	1.60001e-07	3.13203e-06	8.13438e-07	4.25372e-07	8.32193e-08	3.84518e-07	1.90949e-06	7.17298e-06	7.79675e-07	5.4263e-06	7.46547e-07	4.21626e-07	4.37835e-08	2.50879e-07	1.42287e-07	6.36971e-09	1.85669e-06	3.60403e-07	3.15164e-06	1.46646e-08	8.87548e-09	1.25546e-07	3.57099e-08	4.31822e-07	1.81781e-07	2.06506e-08	4.32194e-08	2.85522e-09	1.35434e-08	2.29676e-09	3.87307e-08	1.08719e-07	1.03244e-07	6.24962e-08
	Var72	0.368603	0.614611	0.00880607	0.00698458	0.000446897	3.19784e-05	0.000390472	4.29837e-06	7.77517e-05	3.22744e-07	1.61637e-05	4.45029e-06	2.37825e-06	5.93318e-10	1.92053e-07	8.91404e-07	1.22129e-06	2.84402e-10	1.79127e-06	3.2951e-07	4.8762e-06	1.90746e-06	1.08805e-06	2.37737e-06	6.26791e-07	3.94439e-08	9.17882e-09	1.6925e-07	3.98106e-07	6.87162e-07	2.1401e-07	1.1786e-06	8.19993e-07	2.71259e-08	3.36063e-07	2.77281e-07	1.50284e-08	2.00123e-07	2.53284e-07	2.28457e-07	3.1568e-08	1.26897e-08	5.35784e-09	9.34173e-08	2.45743e-08	3.49353e-09	1.08052e-09	1.01757e-07
	Var73	0.399928	0.583453	0.00756915	0.00789329	0.000345618	5.36955e-05	0.000576482	9.37048e-06	0.000122419	1.27262e-07	2.36065e-05	7.54221e-07	5.76823e-08	1.94453e-06	1.14457e-09	6.65308e-08	5.87195e-07	1.51712e-07	4.02175e-06	1.08215e-10	3.76856e-06	5.23512e-07	1.25625e-06	2.86909e-06	1.4658e-06	1.68426e-07	4.57326e-10	2.4323e-07	9.91153e-07	2.47661e-06	1.76257e-07	3.4949e-07	2.97946e-07	4.61828e-08	9.55595e-07	9.06733e-07	1.46459e-08	1.55335e-07	4.2267e-07	1.88998e-08	2.45511e-07	4.38248e-08	3.55576e-08	2.65291e-08	6.62889e-08	7.0933e-09	9.92349e-08	7.91556e-10
	Var74	0.44664	0.537984	0.00592093	0.00837647	0.000261316	5.74006e-05	0.000571818	1.57835e-05	0.000115238	3.97309e-07	2.08659e-05	5.57306e-07	1.68599e-06	3.95299e-06	1.60864e-06	6.17618e-08	1.88571e-07	1.13465e-08	6.88202e-06	3.95442e-07	4.05741e-07	5.62341e-06	6.95047e-07	2.65028e-06	1.27161e-06	3.46882e-07	1.96075e-08	2.79197e-07	1.04996e-06	1.96931e-06	7.89454e-08	3.05791e-07	3.46583e-06	6.53134e-09	1.08023e-07	6.58263e-07	3.84157e-10	7.60824e-07	2.40413e-08	4.61602e-07	2.18555e-08	8.35335e-08	8.19397e-09	4.36111e-08	1.94454e-09	7.25044e-11	1.00702e-08	5.60738e-08
	Var75	0.510612	0.475442	0.00471005	0.00836543	0.000148074	3.40508e-05	0.000537373	1.70166e-05	7.89554e-05	9.88914e-07	1.47416e-05	4.87132e-06	1.04619e-06	2.99272e-06	3.18075e-06	1.69541e-07	5.31212e-08	1.98192e-07	6.28857e-06	1.20528e-06	5.39074e-07	7.69223e-06	3.19456e-07	2.54526e-07	5.00223e-07	2.49949e-07	2.26768e-07	2.18572e-08	2.05845e-06	6.42152e-08	4.60876e-07	1.15781e-06	3.25359e-06	6.8711e-11	8.26194e-07	4.14151e-07	2.84823e-08	5.23485e-08	5.12371e-07	2.33391e-07	1.91464e-07	2.24588e-08	6.19261e-10	7.10179e-08	5.39668e-08	6.83161e-10	4.08801e-08	8.89995e-11
	Var76	0.588818	0.398778	0.00402361	0.00774678	4.86566e-05	1.22888e-05	0.000467284	8.08621e-06	4.20135e-05	4.58628e-07	9.92235e-06	4.39987e-06	3.74245e-07	5.82117e-07	9.78937e-07	1.58654e-09	3.57658e-07	2.38651e-06	1.89752e-06	5.92281e-06	1.43526e-06	5.12429e-06	5.73505e-08	1.18873e-05	2.53626e-09	1.29375e-06	6.17778e-07	5.24694e-07	1.62465e-06	8.23589e-07	4.15633e-07	2.43261e-07	2.33511e-08	3.40068e-07	9.02446e-07	9.6765e-07	6.89882e-08	2.76454e-07	6.20145e-07	2.88683e-07	1.89517e-08	3.79536e-07	2.33786e-08	1.96686e-09	2.44449e-08	1.00714e-07	1.35193e-08	6.2212e-09
	Var77	0.673371	0.316212	0.00349474	0.00653656	4.7054e-07	4.89251e-06	0.000291611	2.39462e-06	1.58387e-05	5.51259e-06	3.50401e-06	3.01217e-08	2.85538e-06	1.56481e-06	3.40844e-07	1.07698e-06	7.62442e-07	1.6889e-06	5.80705e-07	1.09831e-05	2.62811e-06	1.50728e-06	1.10512e-06	2.15569e-05	2.53355e-06	1.36249e-08	2.67154e-09	2.63381e-06	9.35219e-07	3.61326e-06	7.44462e-07	2.8447e-07	1.86036e-06	5.92554e-07	6.84361e-10	2.7165e-07	3.40997e-08	1.78751e-08	1.15523e-07	2.14532e-07	5.39067e-08	3.94262e-08	5.29367e-10	9.49288e-09	6.53841e-09	6.08866e-08	2.36337e-09	1.64935e-08
	Var78	0.755865	0.235751	0.00286226	0.00523071	5.37971e-05	3.08093e-06	0.000128127	5.63242e-06	2.99445e-06	4.01509e-06	7.46843e-07	1.04184e-06	1.12211e-05	7.10788e-06	2.11462e-06	9.5716e-06	2.1751e-07	9.79046e-07	9.18895e-08	2.19464e-06	1.27767e-06	2.65089e-09	5.31718e-06	9.6571e-06	1.00536e-05	2.584e-06	4.25267e-06	1.26338e-06	1.31146e-05	4.56058e-06	2.44981e-06	1.15827e-06	5.7189e-07	1.57365e-07	5.03524e-08	1.11359e-07	4.37688e-07	3.86989e-07	5.65611e-08	5.52628e-09	1.91539e-08	1.10942e-07	2.43759e-08	7.51238e-10	2.22656e-09	3.08172e-08	2.66326e-09	4.95955e-08
	Var79	0.829994	0.163016	0.00237148	0.00418747	0.00024473	2.04294e-06	6.38359e-05	6.3113e-06	1.73631e-06	7.60528e-07	1.93715e-06	2.16393e-08	1.9346e-05	3.56582e-06	1.39051e-07	2.3779e-05	4.64303e-06	5.05627e-06	7.85492e-06	1.18654e-06	8.59534e-07	1.71788e-06	1.66407e-06	5.30804e-08	1.22373e-05	9.92792e-07	1.28548e-05	5.36462e-07	8.10987e-06	1.26727e-07	1.22309e-06	6.77649e-07	3.27132e-07	3.18532e-08	3.42258e-07	1.16299e-06	5.09867e-08	3.03292e-08	2.28631e-08	1.85314e-08	2.02791e-07	1.92271e-08	1.39221e-07	1.52333e-07	4.68978e-09	2.65019e-09	8.65011e-11	3.99493e-08
	Var80	0.891002	0.102876	0.00215687	0.00321379	0.000524762	4.91144e-08	7.55834e-05	1.23529e-09	2.53e-05	1.06916e-07	1.29521e-06	4.66922e-06	1.65778e-05	2.89989e-07	7.06741e-06	1.23873e-05	4.55391e-06	1.18536e-05	2.14445e-05	5.26696e-06	1.12921e-07	8.47529e-06	5.06863e-07	8.39324e-07	9.53769e-06	1.74749e-06	6.18899e-06	3.00326e-06	2.89201e-07	2.4316e-06	5.16237e-07	2.29776e-07	1.38472e-07	1.26937e-06	1.50706e-06	5.88056e-07	1.39318e-06	7.99709e-07	2.31713e-07	7.48735e-09	2.84977e-09	8.5407e-08	3.77788e-08	2.44857e-09	8.71861e-08	2.57055e-09	8.28945e-09	2.11542e-08
	Var81	0.935792	0.0586687	0.00200629	0.00238456	0.000891644	4.225e-06	0.000115435	3.91395e-06	3.16455e-05	2.31673e-06	1.14629e-06	1.43816e-06	2.57316e-06	6.77083e-07	6.25758e-06	1.90817e-06	1.85276e-07	1.31735e-05	2.78033e-05	4.59455e-06	9.42186e-06	5.00155e-06	1.58085e-07	1.98483e-07	9.08401e-06	4.2756e-06	9.15621e-08	2.29747e-08	3.6417e-06	1.4412e-06	8.95561e-08	2.91183e-06	2.6674e-08	2.23131e-06	2.49503e-07	1.16247e-07	1.27076e-07	1.65019e-07	1.75375e-08	3.3196e-09	1.1099e-07	5.60457e-11	1.45701e-07	3.21846e-08	2.20935e-08	5.43922e-08	2.14759e-08	2.05448e-07
	Var82	0.965385	0.0294188	0.00177262	0.00183116	0.00132824	1.69043e-06	0.000104515	7.37136e-06	1.19582e-05	1.19064e-05	7.85802e-06	3.97295e-06	1.54809e-07	8.5821e-07	1.22691e-09	3.82526e-05	2.33097e-06	2.08989e-06	2.40663e-05	1.91878e-07	1.53233e-05	4.16421e-07	4.64721e-06	2.32982e-06	2.98384e-06	7.11847e-08	4.46483e-06	1.15441e-05	7.66103e-07	1.3892e-09	5.66076e-07	1.14874e-06	6.84527e-09	3.62617e-08	6.74143e-07	1.12458e-06	4.39045e-09	4.39201e-07	4.45642e-09	7.60161e-09	6.5812e-09	2.22909e-08	2.7308e-09	1.34427e-07	9.52649e-08	7.51821e-10	6.26761e-08	8.80913e-10
	Var83	0.983203	0.01204	0.00155317	0.00135196	0.00160526	5.90172e-09	6.37903e-05	1.02678e-05	9.4419e-06	9.65152e-06	8.50361e-06	2.95487e-06	7.47605e-07	2.16851e-08	8.66999e-07	3.79675e-05	6.20452e-06	2.05766e-05	1.22381e-05	1.50941e-07	4.12641e-06	9.00485e-07	1.16709e-05	9.87247e-06	1.69706e-06	1.25732e-05	2.75227e-06	1.61018e-05	9.46542e-08	2.18857e-07	6.16692e-07	1.16497e-07	5.98316e-08	3.68167e-10	4.03125e-07	8.98842e-07	1.79632e-07	5.93765e-07	1.07894e-08	4.07809e-09	5.1665e-09	1.35977e-07	9.84994e-08	9.35901e-08	1.68777e-08	1.19284e-08	1.39323e-10	8.68542e-08
	Var84	0.992388	0.00318811	0.00149782	0.000946593	0.0017216	2.5081e-07	6.17402e-05	1.26157e-05	2.78548e-05	2.9575e-06	4.63364e-06	1.78089e-06	1.36955e-06	1.72266e-06	1.39912e-06	3.55878e-06	3.6991e-06	7.91459e-05	3.30891e-06	5.85523e-07	2.05824e-07	1.07355e-06	7.36599e-07	2.67765e-06	8.55289e-06	2.5479e-05	2.76152e-07	1.49715e-06	3.62866e-08	1.95606e-06	5.0952e-06	4.09474e-07	1.12805e-07	4.68738e-07	1.23958e-06	4.31704e-08	8.54729e-08	3.73439e-07	2.21145e-07	4.00267e-09	5.3319e-09	7.59529e-09	6.2996e-10	8.63646e-08	2.10893e-08	1.37367e-08	2.33604e-08	8.01041e-08
	Var85	0.995358	0.000101212	0.00154604	0.000692468	0.0019775	3.11652e-06	0.000100784	1.2196e-05	8.67181e-05	1.13943e-07	9.87428e-07	4.97433e-06	1.57329e-07	9.00052e-06	8.55479e-07	3.45836e-06	1.78543e-06	4.6735e-05	6.10904e-07	7.32759e-06	6.8757e-07	1.8024e-06	6.84415e-06	2.52129e-06	4.94571e-06	1.51344e-05	2.48132e-06	4.29445e-06	8.74126e-07	2.48875e-09	3.60987e-06	2.12466e-07	2.1455e-09	1.96348e-07	6.92117e-07	1.67129e-07	1.82031e-07	4.57995e-07	1.4753e-09	1.36358e-08	7.51614e-09	3.83361e-07	1.61384e-08	2.45786e-11	1.34119e-07	4.84437e-09	5.2051e-08	6.30851e-10
	Var86	0.994548	0.000813972	0.00149671	0.000548664	0.00219331	9.55343e-06	0.000114686	1.19193e-06	0.000153167	6.77135e-06	2.92852e-06	1.09867e-07	1.34332e-09	1.78313e-05	3.21009e-06	9.08622e-06	6.51817e-06	5.03227e-06	1.33346e-05	2.00167e-05	7.20842e-06	1.99558e-08	7.77048e-06	6.35963e-06	7.40174e-07	2.6395e-07	1.58479e-07	3.90454e-06	1.25182e-07	1.71748e-06	1.13964e-06	6.33683e-07	4.44532e-07	5.62556e-07	4.15096e-06	1.65828e-07	4.82579e-07	2.53616e-07	2.89496e-08	5.29045e-09	7.00679e-08	1.32073e-09	2.29444e-08	7.47941e-08	1.58173e-09	3.95234e-08	2.42672e-11	2.4381e-08
	Var87	0.991667	0.00380361	0.00143105	0.000418282	0.00224257	1.67926e-05	6.53774e-05	7.16385e-06	0.000162202	1.78373e-05	1.78583e-05	1.06945e-07	4.3983e-06	1.4908e-05	2.65105e-05	4.5403e-06	1.7188e-05	4.20643e-08	1.33345e-05	1.78535e-05	2.1513e-05	4.76131e-07	3.04366e-11	5.57829e-06	7.26872e-08	8.86841e-06	5.53572e-06	2.10204e-06	1.53281e-07	2.94913e-08	2.48578e-07	1.24379e-09	5.01373e-08	2.94229e-07	4.43677e-06	5.99341e-07	1.95054e-10	3.52594e-07	2.99312e-08	2.68725e-09	4.65556e-09	1.58967e-07	1.43988e-07	1.19985e-07	2.65524e-08	5.81498e-09	3.12036e-08	4.13632e-08
	Var88	0.986904	0.00870595	0.00146084	0.000248206	0.00231283	1.2385e-05	2.9076e-05	1.49392e-05	0.000148497	2.81946e-06	5.34423e-06	9.24405e-06	1.94425e-05	6.29347e-06	2.88067e-05	6.07906e-07	1.15885e-05	3.02195e-11	2.80677e-06	3.26743e-06	2.54764e-05	1.1921e-06	1.20953e-05	6.88414e-06	1.7313e-07	1.04647e-05	4.78179e-06	3.16402e-06	1.95595e-06	1.6297e-06	5.63855e-07	1.6025e-07	3.84952e-07	7.46726e-08	2.7421e-06	6.38712e-08	5.38564e-07	3.48966e-08	2.68337e-08	1.27245e-07	1.53319e-08	1.32277e-09	4.90809e-08	2.51597e-09	1.62368e-09	9.4123e-08	3.42298e-09	6.75841e-09
	Var89	0.980926	0.0150357	0.00140939	0.000106664	0.00222402	7.92164e-06	2.96253e-05	3.29264e-06	0.000113771	6.21947e-07	5.54876e-07	3.7566e-05	1.38787e-05	1.37281e-07	9.09662e-06	1.58619e-05	1.49799e-06	5.48683e-07	2.90782e-06	1.87439e-07	8.153e-06	1.11099e-07	2.41471e-05	1.33729e-06	1.21781e-06	8.07697e-07	4.70364e-06	5.43484e-06	1.91545e-08	2.48736e-07	5.07659e-06	2.95061e-07	1.4326e-06	3.80011e-09	7.09768e-06	8.99302e-09	2.19611e-07	4.85248e-07	4.14265e-08	8.47209e-12	1.56115e-07	7.22426e-09	3.51309e-09	1.58687e-07	3.83256e-08	6.99975e-10	1.29026e-09	1.02189e-09
	Var90	0.974556	0.0218273	0.00130008	3.17734e-05	0.00201231	2.28205e-05	3.27646e-05	8.01794e-07	7.70254e-05	9.71868e-07	2.10683e-08	2.41345e-05	2.17317e-06	1.31979e-06	3.37449e-07	1.78116e-05	2.72684e-08	2.9358e-07	7.57447e-06	2.35361e-06	3.92567e-09	4.7505e-06	1.73711e-05	3.49421e-07	1.32676e-05	1.54236e-05	1.16524e-06	1.73242e-05	5.97192e-06	5.79967e-07	3.39657e-06	5.54747e-09	1.17724e-06	7.42547e-08	5.28497e-07	5.20109e-10	5.04808e-09	8.77631e-10	1.04567e-08	4.12945e-08	2.81831e-09	1.79751e-08	4.89357e-08	8.43692e-08	1.84149e-09	4.04131e-08	7.03034e-09	1.21667e-08
	Var91	0.968525	0.0278099	0.00143925	2.2849e-06	0.00196782	6.81962e-05	1.46704e-05	2.56321e-06	6.79478e-05	7.8614e-06	3.206e-06	5.18503e-06	3.62622e-07	2.27851e-07	4.58719e-06	1.86071e-06	5.9631e-10	6.58655e-08	8.73401e-06	2.31776e-06	3.55854e-06	1.44262e-05	1.97112e-05	6.5359e-08	4.82297e-06	1.15365e-06	4.91266e-06	2.44448e-06	5.00146e-06	1.30382e-06	1.35848e-07	2.32829e-06	1.16612e-06	8.97831e-07	3.05326e-06	2.60742e-07	7.83709e-07	8.14402e-07	2.1836e-09	3.21919e-08	4.05114e-07	1.02497e-08	6.46199e-08	2.87521e-09	2.70705e-08	2.28795e-09	1.81373e-09	2.25442e-08
	Var92	0.962709	0.0331171	0.00185505	6.1505e-08	0.00200538	8.51752e-05	5.56814e-06	3.34552e-06	8.83652e-05	4.92583e-06	3.13329e-06	2.07829e-07	2.21515e-06	2.94287e-08	2.39607e-05	1.89215e-06	2.29042e-06	2.09932e-06	8.56249e-06	7.25306e-09	9.97701e-06	1.20341e-05	1.8394e-05	2.91659e-08	9.0041e-06	8.56251e-06	1.23456e-05	1.76162e-06	1.37299e-06	6.08252e-08	1.22134e-06	3.62297e-06	1.72401e-07	1.26894e-07	2.05358e-07	7.86747e-07	1.18758e-06	2.00045e-07	5.89258e-09	4.41373e-08	7.49674e-09	1.69152e-07	2.09586e-09	6.26659e-08	4.33183e-09	1.73876e-08	1.00243e-07	1.00196e-12
	Var93	0.955937	0.0395605	0.00211422	7.65713e-06	0.00204736	4.05543e-05	1.45403e-05	9.86863e-06	0.000122081	4.57936e-06	2.21355e-08	9.98768e-07	1.08411e-05	3.61222e-06	3.47753e-05	5.11882e-06	9.06054e-06	1.28624e-05	2.23945e-06	3.84256e-10	4.9773e-06	4.3272e-06	1.88369e-07	4.29452e-07	3.41663e-05	6.99177e-06	3.95536e-06	2.02363e-06	1.06523e-06	3.42388e-07	1.20714e-07	3.95048e-07	1.71508e-06	1.40016e-08	5.24018e-07	4.66538e-08	1.52228e-07	1.74566e-07	2.43696e-09	2.95709e-08	3.0955e-07	7.31181e-08	8.82715e-09	2.86481e-10	4.97457e-09	2.98644e-08	1.13881e-08	1.07463e-09
	Var94	0.947954	0.0473879	0.00203591	7.09316e-06	0.00226324	5.01551e-06	3.5481e-05	2.1751e-05	0.000135272	2.07228e-06	2.99188e-06	8.30708e-07	2.01955e-05	1.20825e-05	2.57624e-05	6.3024e-06	2.43916e-06	2.43584e-05	1.57334e-06	1.30113e-05	1.59751e-07	3.34027e-07	1.87931e-05	3.21743e-06	1.37374e-05	3.06036e-08	2.99483e-07	3.16094e-08	1.29931e-06	3.78625e-07	1.97279e-09	7.55557e-07	9.59393e-07	5.90136e-07	1.6687e-07	1.6601e-07	9.83501e-07	6.28263e-08	2.42773e-08	8.20489e-08	1.01353e-07	3.01836e-07	8.63082e-08	3.67595e-08	3.80308e-08	1.33466e-09	9.81373e-08	1.77267e-09
	Var95	0.940956	0.0542256	0.00201837	3.94613e-06	0.0024403	1.35911e-06	3.69259e-05	3.62024e-05	0.000122356	2.16779e-06	3.30162e-06	1.57798e-07	1.46044e-05	1.27634e-05	1.33977e-05	9.23279e-06	8.78317e-07	1.78221e-05	6.75812e-06	2.5735e-05	2.25672e-07	7.69439e-08	3.8982e-05	2.78976e-07	1.23789e-07	3.93603e-06	4.6747e-06	7.98635e-08	6.0305e-07	9.12858e-08	1.72222e-09	1.29781e-06	6.29355e-08	8.20717e-07	5.49557e-08	8.22639e-08	1.9318e-07	6.19343e-09	3.52409e-07	8.12808e-08	1.87471e-07	1.69026e-07	6.64122e-09	2.13748e-08	1.42164e-08	1.06166e-07	8.53926e-08	1.40302e-09
	Var96	0.936784	0.0584334	0.00216119	2.59495e-05	0.00229123	1.00856e-05	3.25008e-05	2.99546e-05	0.000105867	1.24632e-05	1.06999e-06	2.40061e-06	2.75325e-06	2.77409e-06	4.86446e-06	1.1438e-05	3.61841e-06	1.68109e-05	1.68717e-06	3.05325e-06	4.94358e-07	3.48192e-06	3.45515e-05	4.93253e-06	6.18052e-06	4.21364e-06	2.61149e-06	4.53418e-07	1.51263e-08	1.55055e-06	2.26367e-10	2.112e-09	7.97334e-07	3.78814e-07	1.69998e-07	5.03016e-07	1.83413e-06	5.01725e-08	4.55101e-09	1.50983e-07	2.77657e-07	1.80694e-07	1.55104e-07	8.49233e-08	3.76178e-08	2.36247e-09	9.24977e-09	7.82953e-08
	Var97	0.933495	0.0618767	0.00222904	2.85897e-05	0.00211912	1.23326e-05	4.08036e-05	8.72303e-06	9.77801e-05	9.21411e-06	3.51396e-07	4.70669e-06	3.76962e-08	4.32631e-06	1.34056e-07	5.81157e-06	2.36659e-06	1.04722e-05	1.1557e-07	1.93579e-09	9.07709e-07	1.58572e-05	1.28026e-05	1.1974e-05	3.1535e-06	6.31153e-09	1.59671e-07	3.30297e-07	1.85678e-06	1.84758e-07	1.43781e-06	8.91619e-07	5.12101e-07	5.79143e-07	6.45411e-08	2.63824e-06	6.69482e-09	1.78137e-07	5.14505e-07	2.00443e-07	1.87386e-08	2.69047e-07	1.24786e-10	2.84712e-08	5.75626e-08	5.20171e-08	6.46703e-09	2.73895e-11
	Var98	0.929377	0.0660121	0.00222551	2.90731e-05	0.00212659	4.84918e-06	3.45943e-05	1.92947e-06	8.05178e-05	7.65371e-06	1.95942e-07	1.91631e-06	5.85329e-08	1.80084e-05	1.10855e-06	2.49091e-08	3.73166e-07	1.58863e-06	1.55257e-07	9.12969e-06	2.42744e-06	2.12647e-05	3.27224e-08	1.42255e-05	9.01638e-08	7.37619e-06	1.29191e-06	3.88617e-06	7.62711e-06	1.15705e-06	3.1564e-06	3.88317e-08	5.08853e-07	1.36125e-06	2.72753e-07	4.46135e-07	1.27262e-06	2.30754e-07	1.66879e-07	3.65131e-07	2.04398e-07	5.76069e-09	2.31515e-09	8.8363e-08	9.00604e-08	1.2237e-08	1.69203e-08	1.76332e-07
	Var99	0.925208	0.0699472	0.00231285	2.53007e-05	0.00228313	5.91908e-06	1.66392e-05	4.99882e-06	4.47845e-05	7.14098e-06	4.1303e-07	3.27611e-06	4.16841e-07	1.38495e-05	1.54758e-06	2.45834e-06	2.64648e-07	2.44533e-05	8.03921e-09	2.91088e-05	4.84019e-06	1.87517e-05	1.67059e-06	4.86581e-06	4.06088e-07	1.10638e-05	8.95612e-06	2.75061e-06	4.48032e-06	4.97551e-07	2.51962e-08	2.92545e-06	1.06306e-06	1.74948e-06	9.90454e-08	1.68599e-06	2.81416e-07	3.58507e-07	3.9143e-07	9.39045e-08	4.72165e-07	7.80105e-08	1.15031e-07	1.39048e-07	7.89855e-11	2.78772e-08	1.46635e-08	1.1972e-07
	Values in bold correspond for each variable to the factor for which the squared cosine is the largest
	Factor scores:
		F1	F2	F3	F4	F5	F6	F7	F8	F9	F10	F11	F12	F13	F14	F15	F16	F17	F18	F19	F20	F21	F22	F23	F24	F25	F26	F27	F28	F29	F30	F31	F32	F33	F34	F35	F36	F37	F38	F39	F40	F41	F42	F43	F44	F45	F46	F47	F48
	MET_1.961%.0	-12.8265	-0.382044	0.944684	-0.4389	-0.0899442	0.0195984	0.0738206	0.00177984	0.0770808	0.100729	-0.0373872	-0.00403475	-0.00119691	-0.0367176	-0.0404784	0.0621024	-0.0219847	-0.041071	0.0292421	0.0107587	-0.0240436	-0.054118	-0.00505434	0.016965	0.0172067	-0.00237501	-0.0135161	0.00532475	0.00197435	-0.00194906	0.00656101	-0.00716032	0.00226343	-0.00538368	-0.00494346	-1.51897e-05	0.00587586	0.00590247	-0.00785021	0.00294186	-0.00176318	0.00211009	0.00147818	0.00116755	-0.000320032	-0.000730069	-0.000217308	-0.00243978
	MET_16.666%.0	-8.88003	2.57341	-0.953852	0.495636	0.750093	0.2284	0.0437569	0.0523705	-0.135234	0.035435	0.138064	-0.0213025	0.0277976	-0.0417279	0.028158	0.0238413	-0.00394925	-0.0208795	-0.0808731	0.00252787	-0.0286837	0.00665197	-0.010335	-0.00137521	-0.00877439	0.000344148	-0.0068204	-0.000806025	-0.0085669	0.00347415	0.00846635	-0.0146548	0.00803155	0.00131465	-0.000929582	-0.00417368	-4.2774e-05	0.00279215	-0.00114843	-0.00287652	8.83561e-05	0.000216058	-0.00129444	-0.00106935	0.000944064	-0.00109859	-0.000260977	0.000218031
	MET_2.1739%.0	-12.9127	-0.382501	0.820698	-0.45925	-0.12906	0.0237218	0.038197	-0.0290584	-0.0222454	0.0284342	0.0373095	-0.0780262	-0.0148807	-0.0220094	-0.000661442	-0.0117678	0.00071802	0.0394898	-0.00188974	0.0470219	0.0461537	0.015699	0.0344974	0.0139835	0.0102207	0.00654931	-0.0136128	-0.014219	-0.016097	-0.0179901	-0.00687861	-0.00336633	0.000435246	-0.00304538	-0.00171439	0.00594783	-0.00328454	0.000131671	0.00470494	0.000708627	0.00310153	-0.00157958	-0.000431787	0.000459385	-0.00401049	-0.00356901	-3.48028e-05	-0.00235625
	MET_2.439%.0	-12.7188	-0.443433	0.624815	-0.596283	-0.0762413	0.0378822	-0.00317346	0.101437	-0.0076279	-0.0348552	0.09692	-0.0630975	0.0428675	0.074181	0.00210239	0.0163712	0.0212495	0.00351809	0.0166377	-0.024733	0.00525551	0.0018672	-0.00606717	0.0055838	-0.00917466	0.0172805	-0.00354727	-0.00336163	0.0139496	-0.00283644	0.00274171	0.0205319	0.00501854	-0.0135643	0.000125446	-0.000479862	-0.000501074	-0.00144046	-0.00262729	-0.00609557	-0.00589252	-0.00436392	0.00448213	0.00113769	-0.000949775	0.00154513	-5.80245e-05	-0.000465071
	MET_2.7777%.0	-12.5675	-0.317669	0.579524	-0.489898	-0.0137088	0.0436725	0.0403172	0.0244288	0.0854786	-0.0189335	0.0432079	-0.0561656	0.0499312	-0.0348105	-0.0146873	-0.0323024	-0.0365292	0.00158023	0.0383669	0.012908	-0.025602	0.0152722	-0.0264058	-0.0431016	-0.0133209	-0.0122811	0.027093	-0.0155043	-0.00731643	0.00494025	-0.013406	-0.00334425	-0.00772115	-0.00403812	0.000311906	-0.000481703	0.00019339	0.00224602	0.000734533	0.00113625	0.00119158	0.00254816	0.00227534	-0.00585794	0.000138245	-0.000154866	0.000808642	0.000358991
	MET_3.2258%.0	-12.7126	-0.253356	0.700924	-0.368886	-0.0566019	0.0124899	0.0181976	-0.107955	-0.0168394	0.0667129	-0.00257215	0.00243489	0.0785362	-0.00300979	-0.0413138	-0.0260094	0.0077213	0.00555837	0.0127752	-0.0318647	0.0370289	-0.00582765	0.0138977	-0.0127898	-0.000664491	0.00731648	-0.00557896	0.00647962	-0.0154942	0.018668	0.0137463	-0.00539463	-0.0137943	0.00377635	-0.00438794	-0.00748861	0.00353371	-0.000322676	0.00626814	0.0002762	-0.00323805	-0.00449846	-0.00366653	0.00176431	0.00472525	0.000403628	-0.000700585	0.000146411
	MET_3.8461%.0	-12.8745	-0.943732	0.981232	-0.787342	-0.164692	-0.0520612	0.0915354	0.0022512	0.0369636	-0.0112297	-0.0468505	-0.0819375	-0.00490184	-0.00592351	0.0595885	-0.00653506	0.0417477	-0.0608654	-0.00586471	0.0365186	0.0080841	0.00108685	-0.0244226	-0.0108568	0.0172686	0.00398883	-0.00113529	0.0172519	0.00888648	0.00181351	0.0131028	0.0110541	0.00479997	0.0141347	0.00273979	0.00214614	-0.0050024	-0.00342397	0.000995452	-0.000249403	0.00587445	-0.000672599	0.000567476	0.000488509	0.00181629	-0.000397978	0.00117707	0.00195299
	MET_4.762%.0	-12.3697	0.108183	0.483335	-0.198419	-0.0170349	0.035461	-0.0312789	-0.106179	-0.103461	-0.0931534	-0.036068	-0.0271822	-0.0594979	0.0195208	-0.0209856	0.0806273	0.0426496	0.00209681	0.0170184	-0.0287587	0.0092509	-0.00969788	0.01581	-0.0145849	-0.0104649	0.00244143	0.0254167	0.0017872	-0.014349	-0.0187455	-0.00940131	-0.0168018	0.0091121	0.0059472	0.00725249	-0.00129417	0.000277331	0.00252417	-0.00117495	-0.0006857	-0.000974157	0.00190269	-0.000437978	0.000525387	7.73418e-05	0.00237894	-0.000250854	0.00126813
	MET_6.25%.0	-11.2888	0.340359	0.0890723	-0.303451	0.271174	0.116405	-0.14355	0.0514186	-0.106123	0.0295772	-0.0352442	0.0348592	0.0222349	-0.0106562	0.0737055	0.00604041	-0.0270955	0.0021565	0.0233076	0.00278671	0.00658779	-0.0295493	-0.010175	0.0328285	-0.015875	0.0134891	0.0103491	-0.00470578	0.0114655	0.000966204	-0.0128458	0.00791662	-0.0135139	0.00500357	-0.00964035	0.00197029	-0.00452157	-0.000338837	0.00127393	5.49954e-05	0.000366491	0.00264898	-0.00550804	-0.00129134	-0.00202309	0.00165594	-0.00277123	0.00163009
	MET_9.091%.0	-11.8323	1.11449	-0.0684363	0.281963	0.196965	0.0387858	-0.0660011	6.60647e-06	-0.0507141	-0.0305521	-0.0239394	-0.0198454	0.0463823	0.00955937	-0.00360635	-0.0210855	-0.0701899	0.0105491	0.00506861	-0.0113804	0.025195	0.0127493	-0.00387884	0.0173243	0.0066812	-0.0252167	-0.0107964	0.0104038	0.0108095	0.000896406	-0.00720183	-0.0120116	0.0169287	0.000186877	0.00201388	-0.00163952	0.0070123	-0.0123032	-0.000816404	0.00523165	-5.4055e-05	0.00075918	0.00185248	0.00133407	-0.000470292	0.00136533	0.00247868	0.00152886
	Met_0%	-14.4789	-0.473295	0.921106	-0.420404	-0.836503	-0.0629798	0.0220198	0.173769	0.0022585	-0.0220989	-0.0187425	0.146682	-0.0478519	-0.046413	-0.0461782	0.00693639	0.0123592	-0.00927983	-0.0425485	-0.00996175	0.0170511	0.0153774	-0.00362523	-0.0206292	-0.022578	-0.00815575	-0.0195319	-0.000186568	-0.00311226	0.000937976	-0.00881186	0.00986363	-0.00349867	0.00107087	-0.00083225	0.000917271	-0.000331472	0.000337044	-0.0014796	0.00195215	0.000791664	-0.0013452	-0.00189474	0.000808333	-0.00189607	0.00189674	0.00189707	-0.000216233
	Met_100%	6.3753	19.0603	-5.76598	-1.45652	-0.609308	-0.00726739	0.0784348	-0.0194415	0.0119007	-0.0018854	-0.0127076	-0.00264416	0.0028721	0.00316657	-0.000534002	0.000327112	-0.00190553	0.00491602	0.000772668	-0.00108191	-0.00241996	-0.00122678	0.0019316	0.00265427	-5.75612e-05	-0.000212302	-0.000197032	0.000297571	-0.00109606	0.000376746	-0.000636074	-0.00012576	0.000178168	0.000175144	-0.000257027	4.7767e-05	0.000141704	-0.000195668	-0.000156127	-1.07227e-05	2.76963e-05	-3.81351e-05	7.52771e-06	0.00010819	-0.000129041	0.000129206	1.23015e-05	1.69054e-06
	Met_1%	-14.3621	-0.114091	1.18718	-0.124793	-0.697634	-0.07582	0.0703314	-0.0745824	0.00326169	0.108488	0.036748	0.0255035	-0.116052	0.0597265	-0.0210735	-0.0247467	-0.0136805	0.0287555	-0.0191021	-0.0121018	-0.0508343	0.027168	0.00261314	0.0120191	0.0148812	0.00453829	0.0116166	-0.00543805	0.00526034	0.0098871	-0.00556376	0.000126584	-0.00146579	0.00514188	-0.00431193	0.00238812	0.001972	-0.00560957	-0.000631804	-0.00285284	-0.00021751	0.00273083	0.000937161	0.00129375	0.00181037	-0.00174889	-0.00152473	0.00119377
	Met_5	-13.5514	0.208134	0.444908	-0.0198073	-0.458558	-0.083505	-0.0322703	-0.0946681	0.0150841	-0.108995	-0.0183981	0.0858001	-0.00361868	-0.0169948	0.0443159	-0.0533726	-0.0077706	-0.00801619	-0.0179734	-0.0134182	0.00604954	0.00570174	0.00775328	0.0166766	0.0117229	-0.00256346	0.00934874	0.00487202	0.0184953	-0.00112579	0.0178394	-0.00527454	0.00336811	-0.0143441	0.0144735	-0.00481821	-0.00188111	0.00787414	0.00376543	0.000425659	-0.000666215	0.00209629	7.25241e-05	-0.00287477	-0.000210199	-0.000826011	-0.00153493	-0.00131086
	Met_10%	-12.9976	1.86313	-0.375078	0.875716	-0.0856875	-0.0651118	-0.148035	0.0394148	0.0658853	-0.0449345	-0.0594716	0.0184783	0.079713	0.0641607	0.0329536	-0.0283441	0.0400431	0.0439302	-0.00270624	0.0286566	-0.0545491	-0.0258591	0.0216331	0.00305923	-0.00733128	-0.0217299	-0.011474	-0.00729549	-0.0140479	0.00156623	0.00141573	-0.00334532	0.000822946	0.00817746	0.00302121	0.00525074	-0.00376317	0.00172466	-0.00354411	0.000751823	-0.000803066	-0.00181326	-0.000622856	0.000986847	0.00108961	0.000275221	0.000861437	-0.00101317
	Met_20%	-11.4042	3.63928	-1.25147	1.72631	0.430812	-0.0846604	0.0206056	-0.0778952	0.176432	-0.071211	-0.056502	-0.0106533	0.00124552	-0.0394937	0.00134385	0.0616351	-0.0223838	0.0302619	-0.0143067	-0.0192351	0.00348562	0.0192531	-0.0114624	0.000194055	-0.00472257	0.0222227	-0.000911031	0.0124237	-0.00257801	-0.00312149	0.00199949	0.0130053	-0.00611004	-0.00283563	-0.0104617	-0.00189495	0.00146388	-0.00044624	0.000301338	-0.00332093	0.00366489	-0.000761087	0.0014951	0.000435439	-0.000771352	-0.000972769	-9.97447e-05	0.000797328
	Met_30%	-9.75048	5.44915	-2.35617	2.15255	0.530926	-0.0390392	-0.00546794	0.0634454	-0.073577	0.0828888	0.0278704	0.00796665	-0.0652534	0.0149897	-0.034552	-0.0381108	0.0291286	-0.0459726	0.0432195	0.0152752	0.0273524	-0.00237483	0.00115633	-0.0143915	0.0123112	-0.00139106	0.00564349	-0.00666519	0.00993163	5.13016e-05	-0.00172716	0.00519891	-0.00339756	-0.000538364	0.00613321	0.00231206	-0.00104578	0.000495335	0.00153885	0.00218128	-0.00171584	0.000243278	0.000227391	-5.80288e-05	0.000167735	0.000262032	-9.12079e-05	-0.000754735
	EtH_7.33%.0	5.84111	-3.95583	-1.03211	0.220255	-0.525863	-0.236683	-0.0759772	0.0916282	0.0125057	0.00141018	-0.01003	-0.0634882	-0.044181	0.0618927	0.0504767	0.0297365	-0.0135967	-0.043703	-0.00303915	-0.0393438	-0.0103509	0.0131428	-0.00828294	0.0138989	0.0114048	-0.00480444	-0.0036477	-0.00749778	-0.020326	-0.000342361	0.00920925	-0.0125564	-0.011546	-0.00610948	-0.00279926	0.00159352	0.00533236	0.000330869	0.00385236	0.00338479	0.00072051	-0.00428309	-0.00254289	-0.0038473	-0.00229782	0.000215649	0.00133637	0.000689007
	EtOH_11.99%.0	5.38173	-3.82406	-0.991615	0.088369	-0.31007	-0.1931	-0.0749621	0.0114758	-0.00874677	0.0678285	0.00917806	0.00899168	-0.0288365	-0.0519491	0.0432464	0.0204928	-0.00788272	0.0365864	-0.0139761	0.0345347	0.0311747	-0.0242719	0.0109484	-0.0110285	0.0217734	-0.0189436	0.0208058	0.00670644	-0.0109403	0.0159023	0.0031966	-0.00349873	-0.00153041	-0.00973704	-0.000306803	-0.00311098	-0.00891633	-0.00194111	-0.00681133	-0.00282065	-0.00397241	-0.00209246	0.00339633	0.000710368	-0.000521822	0.00132325	2.11436e-05	0.00256833
	EtOH_14.32%.0	5.15447	-3.78436	-0.971649	0.0331302	-0.230318	-0.164799	-0.0767429	-0.00100943	0.0230196	0.0302104	-0.0177202	-0.0384034	-0.0119413	0.0304915	0.00416826	0.0405997	-0.0398585	0.0117579	-0.00499851	0.0399267	0.00697972	0.00530002	-0.00449501	-0.025953	-0.0136095	0.00465955	-0.00997306	0.00518938	0.00898754	0.00465563	-0.0082622	0.00659825	0.0118997	0.000252636	0.0129871	-0.00501453	0.00533093	-0.00244625	-0.00236311	-0.00230126	0.000902272	-0.00183494	-0.0074475	-0.00225609	0.002173	0.000202014	-0.00351304	-0.00272202
	EtOH_16.65%.0	4.88553	-3.60179	-0.907147	-0.0603003	-0.0780685	-0.14914	-0.0615862	-0.0906733	-0.01656	0.121737	0.0536767	0.0410916	0.0433652	0.00572618	-0.000756999	-0.0157679	0.0220482	0.0145161	0.00398404	-0.00858716	-0.00409005	0.0294372	-0.0223064	0.00251472	-0.0165375	-0.00618173	0.0173181	0.0121738	0.00770379	-0.0250118	0.00262561	0.00397028	0.0111154	-0.000804894	-0.0112174	0.00121699	-0.00201473	0.00603792	-0.003755	0.00828716	0.00376947	-0.00481846	0.000378651	0.000274281	0.000625007	0.000856581	-0.000720606	9.67693e-05
	EtOH_18.98%.0	4.85395	-3.49682	-0.794351	-0.0485679	0.109852	-0.0966094	0.00751473	0.00825089	0.0680458	-0.00448757	0.0282626	-0.0176084	0.0207931	0.0134094	-0.0578667	-0.00868592	-0.0200577	-0.0191388	-0.0170417	0.0265755	-0.0180526	-0.00287614	0.0183831	0.00397114	0.0125369	-0.0202646	0.00839191	0.0190723	-0.00147592	-0.00803837	-0.000402469	0.0104059	0.00801855	0.00719738	-0.00793083	-0.00190468	-0.000827429	0.00503638	0.0129497	-0.00400917	-0.0057355	0.00354827	-0.00224092	0.000759407	-0.00375354	0.00258223	0.000196857	0.000691234
	EtOH_21.31%.0	4.40321	-3.37569	-0.810441	-0.172372	0.194155	-0.0939243	-0.0117952	0.0138069	0.0125716	0.0142789	0.044811	-0.0398759	-0.00266604	0.000952593	-0.00919211	-0.0264311	0.0499594	0.0224896	-0.0272081	-0.000930481	-0.00111857	-0.032697	0.0388228	-0.0102769	-0.0149684	0.0123346	-0.0108536	0.0230684	0.0162605	-0.00336043	0.000978444	-0.00996532	-0.0160117	-0.00301842	-0.00153631	0.00102767	0.00806526	-0.0059585	-0.000368602	0.00190697	0.00413035	0.00508486	0.00349478	-0.00372198	-0.000962984	0.00222586	-0.000666716	-0.00036892
	EtOH_23.64%.0	4.20009	-3.25634	-0.796806	-0.238163	0.375473	-0.0751567	0.0380698	0.0207077	0.0669053	-0.0231743	0.0239919	0.0765269	0.0224676	0.013255	0.0338277	-0.033497	0.00773166	-0.00237582	0.0004916	0.021343	0.0189759	0.0215872	-0.0198109	0.00520689	0.0272442	0.0391082	0.00693191	-0.0111024	-0.0176083	-0.0151354	0.000476569	-0.00494303	0.000428464	0.00261432	-0.00324421	-0.00340911	0.00453049	-0.00313115	-0.00623887	-0.0016908	-0.00340062	0.00604263	-0.0023266	0.000718557	0.00224586	0.00228785	0.00237703	-0.00169855
	EtOH_25.97%.0	3.89816	-3.07154	-0.725719	-0.294187	0.48446	-0.0560141	-0.00907777	-0.0383196	0.00143894	0.0399776	-0.0512825	0.0554833	0.00872216	0.0178908	-0.0295624	-0.00573151	-0.0392891	-0.0198536	0.0134009	0.00337892	-0.0180539	0.00840723	0.00435444	-0.0128466	-0.00692235	0.0302725	-0.0405535	-0.00814773	-0.00470098	-0.0104414	0.00255797	-0.0115293	0.00154424	0.00119382	0.00735106	0.000514615	-0.0125698	-0.000553281	0.00186066	-0.000293564	-0.00122407	-0.000914288	0.00507324	-0.00166847	-0.000589085	0.000540049	-0.00187841	0.00307067
	EtOH_28.3%.0	3.51826	-2.99525	-0.682785	-0.293183	0.479434	-0.0344412	0.00224089	-0.0676678	0.00145513	-0.0481199	0.0135977	0.00895637	-0.019101	-0.0208551	-0.0401065	0.00754713	0.0603168	0.00234295	0.0113063	0.0244125	-0.00899968	0.00441142	-0.0136929	0.0362088	-0.00740857	-0.0122747	-0.0124301	-0.00354035	-0.00242666	0.00375684	-0.011079	0.013392	-0.00317553	-0.00013505	0.0045892	-0.0148756	0.00311023	-0.00217542	-0.00247078	0.00281984	-0.00419173	-0.000932814	-0.00142568	-0.00422116	-8.14264e-06	-0.0038751	0.00105909	0.00265158
	EtOH_30.63%.0	3.33214	-2.9567	-0.715852	-0.392194	0.625033	-0.00658974	0.00817097	-0.0258891	-0.00188876	-0.064722	0.0091967	0.0658452	-0.0402543	-0.0406193	0.0502143	-0.0321151	0.00406734	-0.0373188	0.0423876	0.00560952	-0.0188916	0.00453437	0.0490966	-0.00685095	-0.00447772	-0.00566253	-0.00450085	-0.00246466	0.000636171	0.00780619	-0.01197	-0.00346829	0.0104989	-0.00522125	-0.011514	0.00479216	0.0097282	0.0012406	0.000431755	-0.00604901	0.00316145	-0.00537951	0.000282761	0.00167129	0.00150629	-0.000300125	-0.000143182	0.000524527
	EtOH_32.96%.0	3.04396	-2.94357	-0.836454	-0.526332	0.678021	0.032497	-0.0345604	0.130286	0.0149449	-0.014042	0.00321487	-0.0186014	-0.0356941	-0.0262662	-0.00777506	0.021019	-0.0307449	0.0389571	0.006445	-0.0103209	0.0166733	0.0284613	0.00878808	0.0198911	0.00167643	-0.0136247	0.00211857	0.00576749	0.00775077	-0.00561543	0.00920341	0.00320812	-0.0114581	0.0141705	0.0105497	0.0121845	0.00394133	0.00842048	-0.000861486	-0.000437628	-0.00235224	-0.000597675	0.00276929	-0.000480873	0.00513939	-0.000393146	0.000118613	0.00016842
	EtOH_35.29%.0	2.48278	-2.75757	-0.81504	-0.590802	0.760843	0.02896	-0.0853537	0.0605505	-0.0538378	0.0512987	-0.0683699	0.03715	0.0387356	0.0207586	-0.000696012	0.0235246	0.0127253	0.000754593	0.00739011	-0.0489419	-0.0102769	0.0114257	0.0149136	-0.0260639	0.0118978	-0.0137252	0.00783311	0.0138805	-0.00181839	-0.00436402	0.00412406	0.00875739	0.000254906	-0.0104444	0.000483894	0.00353478	-0.00622205	-0.00553329	4.37698e-05	-0.00139792	0.000739692	0.00527037	-0.00317284	0.000928332	-0.000413232	-0.0055229	0.00121149	-0.000980074
	EtOH_37.62%.0	2.11977	-2.47513	-0.624468	-0.530358	0.829384	0.0528178	-0.0710215	0.0152101	-0.124249	-0.0838054	-0.0894756	-0.0314636	-0.0547072	0.0165629	-0.0687596	-0.0491405	-0.0180134	0.0263192	-0.0185336	0.0244193	-0.0204711	-0.0165496	-0.0331616	-0.00673659	0.00411085	0.0157759	0.0163694	-0.00467287	-0.00169241	0.00958637	0.0169935	0.00242182	-0.00271402	-0.00333658	-0.00234192	-0.00243596	0.00308868	0.00165251	-0.00158838	0.00168679	0.00328507	-0.00377439	-1.82233e-05	0.0032094	-0.00313803	0.000589079	0.000186618	-0.00085759
	EtOH_39.95%.0	2.00678	-2.37539	-0.386629	-0.481057	1.23091	0.0424134	0.198994	-0.0961479	0.149506	0.0243863	0.0135384	0.00954625	-0.0386387	0.0343548	0.036662	0.0155344	0.0193474	0.00272209	-0.0238962	-0.0304031	0.021172	-0.00837624	-0.0227705	0.00325057	-0.00744823	-0.0227816	-0.00410695	-0.0169467	0.0047353	0.0200581	-0.0108258	-0.00390275	0.00135639	0.000895824	0.00268481	0.00243511	-0.00624238	-0.000190858	0.00302854	0.00311881	0.000267438	0.000166697	0.000426189	0.00176315	-0.00162748	0.00232522	-0.000356094	-0.0024884
	EtOH_5%.0	5.9803	-4.10127	-1.11886	0.286796	-0.731134	-0.269342	-0.109711	-0.0272943	-0.0472671	-0.069793	0.0329597	-0.043478	0.0185581	-0.037926	-0.00723036	-0.0129342	0.0201824	-0.00639753	0.0197803	-0.0106159	0.0104654	0.00627388	-0.040276	0.00263278	-0.0279463	0.00989823	-0.0109875	0.00273994	0.00199378	0.0207565	-0.000988736	-0.0129833	0.00542655	0.00473969	-0.00429871	0.0111885	-0.000992723	0.00184236	2.62973e-05	-0.000965091	-0.00368283	0.00504834	0.000835231	0.00391702	-0.00135223	-0.00290086	-0.000673141	-0.000714927
	EtOH_9.66%.0	5.63275	-3.96824	-1.06878	0.10365	-0.404071	-0.216085	-0.112502	-0.0199298	-0.0366011	-0.0255363	0.042037	-0.0132957	0.0486214	-0.0496853	-0.0309414	0.0283091	-0.0161542	-0.0224484	-0.0150462	-0.0254233	-0.0167363	-0.0233079	0.0233886	0.0104065	0.012592	0.00196852	0.011899	-0.0361199	0.0141855	-0.00537549	-0.00482072	0.00853051	-0.0048473	0.00714793	0.00462763	-0.0076121	-0.00456148	-0.00414052	0.00264757	-0.000322118	0.00540124	-0.000646875	0.0019758	0.00285794	0.00234552	0.000264218	0.00135351	-0.0015939
	Met_11.99%.0	6.89569	-1.93124	0.0352537	0.387135	-0.237713	0.133451	0.233673	0.0354377	0.0802681	-0.0125335	0.0233554	-0.0358323	0.00996294	-0.01942	-0.0247036	-0.0515191	-0.01655	-0.0310446	0.00520315	-0.0190349	-0.00169803	-0.00481698	0.0202118	0.0243359	-0.0286274	-0.00505901	0.0150702	0.00538195	-0.0251669	-0.00522803	0.0077413	0.00902588	-0.000380688	-0.00375875	0.0125386	0.00330058	-0.0019949	-0.00469455	-0.00681343	0.000370864	0.00263272	0.00105214	-0.00268959	0.00329759	-0.00080625	0.000521899	-0.00274507	0.00130418
	Met_14.32%.0	7.03943	-1.1366	0.303288	0.385151	-0.315404	0.0805533	0.163532	-0.0483649	-0.0704949	0.0103758	-0.0123379	0.00492002	0.0181248	-0.0246417	-0.0146392	-0.0267068	-0.00117028	0.0125801	-0.00451669	-0.0241622	-0.0173143	-0.0282777	-0.0321956	0.0119205	0.0241395	0.0133399	-0.000960833	0.0271887	-0.00268403	-0.00276194	-0.027747	-0.00228478	-0.00273542	-0.00151885	0.00848197	0.00925625	-0.00379283	0.000263184	0.00152303	-0.00449853	0.000236789	-0.00536439	-0.00108591	-0.00287367	0.000744189	0.000490134	0.00242236	-0.0015635
	Met_16.65%.0	7.27404	-0.494684	0.429981	0.306155	-0.267903	0.0562732	0.244554	0.187414	0.0445042	-0.0838724	0.00821597	-0.0389123	-0.0256939	0.0134213	0.00369873	-0.0147825	0.00362546	0.0358663	0.0136732	-0.0136695	0.00208148	-0.0186044	-0.000130128	-0.0100305	0.0159966	0.00339641	-0.00704763	0.00050383	0.0151242	-0.00723343	-0.00758262	-0.0153114	0.00482536	-0.00242561	-0.0105101	-0.0115863	-0.00663562	0.00370329	0.0018221	0.0040723	0.000443058	9.64708e-05	-0.00278914	0.00240328	0.00332689	-0.0017173	-0.00144318	0.00143197
	Met_18.98%.0	7.4671	0.13777	0.765624	0.341974	-0.244083	0.0313456	0.152528	-0.101665	-0.142468	-0.052856	-0.0926495	-0.0673428	-0.0119011	0.0184552	0.0142155	-0.00831408	-0.0232853	-0.0281154	-0.0317928	0.011137	0.00398436	0.0182473	0.0238561	-0.00396171	-0.0121295	-0.0108817	-0.0100795	-0.00408711	-0.0022515	-0.000336643	-0.00447281	0.0166714	-0.00541264	-0.00532123	-0.013901	0.00198841	-0.00444733	0.00211342	-0.00425748	0.00304312	-0.00442187	0.00286506	0.00204388	-0.00201556	0.00408637	0.00116213	0.000497832	-0.00174982
	Met_21.31%.0	7.7257	1.00228	1.07857	0.296197	-0.173751	0.0101765	0.161736	0.0447584	-0.036631	0.102903	-0.0620288	-0.00686823	-0.0353468	-0.0577049	0.047023	0.0066983	0.0106901	0.0447248	0.0318198	-0.00791285	-0.0217666	-0.00708806	0.00471204	0.00436786	-0.0314998	0.0151583	0.0033336	-0.00920621	-0.00159936	0.00252179	0.0197057	0.00654688	0.0158562	0.000990108	0.00320895	-0.00385012	0.00215305	-0.00286449	0.0082271	0.000440295	-0.00210093	0.00104704	0.000716072	-0.00179137	-0.000219161	0.00112235	0.00292467	-0.000935903
	Met_23.64%.0	7.99822	1.59303	1.19308	0.195381	-0.0720753	0.00074061	0.153747	0.0376721	-0.0517076	-0.0664656	0.0132398	0.0743105	0.0586537	-0.00186561	0.00536371	0.0323418	0.0101972	0.00438572	-0.00613457	-0.00603926	0.00331342	-0.00683875	0.00446557	-0.0124672	0.0327772	0.00646668	0.0110437	-0.00558599	-0.00872037	0.00886044	0.00281757	0.0107883	0.00749604	0.0109406	-0.0017503	0.00689746	0.00672537	-0.00436099	0.00119137	0.00594706	-0.00206374	-0.00166922	0.00380957	-0.00328083	-0.0025691	-0.00133036	-0.00448976	-0.000323419
	Met_25.97%.0	8.19171	2.34013	1.46638	0.179828	-0.0482573	-0.0130529	0.140461	-0.0270872	-0.0360746	-0.0513071	0.0771368	0.0792891	0.0291954	0.0570311	-0.047975	0.0710664	-0.00655146	0.00421943	0.0251536	0.0541714	0.00599177	0.00544527	0.00142667	0.0144243	-0.00878818	-0.00168401	0.00545547	0.000376094	0.00696046	0.0129018	0.0137888	-0.00754081	-0.00416956	-0.00915412	-0.00127355	0.00877314	-0.00413289	-0.00126127	0.00223293	-0.000575115	0.00560596	0.00119906	-0.00257872	-0.00086497	0.00186948	0.000692501	0.00222209	0.000952972
	Met_28.3%.0	8.20767	2.70181	1.56905	0.181941	-0.114861	-0.0150383	0.0551319	-0.0260448	-0.0945056	0.0138831	-0.0108384	-0.00553905	0.020766	-0.0257319	0.0182609	0.00398652	0.0247406	0.0199184	0.0315738	-0.00296594	-0.0126946	0.0314187	-0.0354258	-0.00543358	0.0204492	-0.0379175	-0.0268452	-0.00546229	-0.00183544	-0.0121069	0.00533348	0.000259502	-0.0123468	-0.00211268	0.00258307	-0.00617105	0.00445352	0.000204427	-0.000261058	-0.00627236	0.00348814	0.0023107	0.000586102	0.00274987	-0.00176512	0.00276581	-0.00243644	-0.000215114
	Met_30.63%.0	8.62624	3.70933	1.90839	0.119689	0.0803799	-0.0239253	0.0770656	-0.0363951	0.0553572	0.0279264	-0.0578705	0.000978342	0.0304891	-0.00998716	0.0140391	0.00306678	0.00411483	-0.0199522	-0.0358991	0.0239356	-0.00228625	-0.000427332	-0.00342296	-0.0144921	-0.0161323	-0.000498141	0.0167001	-0.0132419	0.025505	-0.0198019	-0.000982123	-0.0147325	-0.0125404	-0.00167257	0.00359427	0.00584891	0.00607816	-0.00371738	0.000198213	-0.00106439	-0.0073496	-0.0039739	-0.00192409	0.00322277	-0.00157075	-0.00217346	0.00054907	0.00146961
	Met_32.96%.0	8.78556	4.60667	2.15543	0.0632132	0.106504	-0.0204349	-0.0442613	0.0732191	0.00824585	0.0225352	-0.0332519	0.0104145	0.0135303	0.0250979	-0.00374872	-0.00125543	-0.00406654	-0.0245394	0.0136122	0.00227855	0.00669381	0.0395868	0.0228276	0.0157306	-0.0132583	0.00553581	0.017119	0.0191518	0.00246047	0.0128264	-0.00610945	-0.0150506	-0.00409682	0.0125292	-0.00121922	-0.0146843	-0.00547374	0.00119259	-0.0043409	-0.00300396	0.00115687	-0.00192181	0.00353679	-0.000788652	-0.00311656	-0.000927787	0.000256671	-0.00312453
	Met_35.29%.0	9.05215	5.72014	2.48267	0.0150792	0.195309	-0.0256111	-0.118837	-0.073346	0.0118922	0.00445776	0.0757838	-0.0472746	-0.0030882	-0.013124	0.0211101	-0.00475443	-0.0130399	0.0116545	0.00685397	-0.0217439	-0.0150799	0.0110811	0.0315145	-0.0182944	0.0202693	0.0208699	-0.0140438	0.0012941	0.00614897	0.0138659	-0.00356115	0.0118588	-0.000215611	0.00181216	0.00765046	0.00144551	0.000307731	0.0078954	-0.00567775	0.00548069	-0.000248379	0.00135802	-0.00451971	0.00199107	-0.00322425	0.00103496	0.00237069	0.00203569
	Met_37.62%.0	9.19255	6.35061	2.48051	-0.111778	0.177258	-0.0285696	-0.251745	0.0407455	0.0189783	0.0169063	0.0184812	0.02019	-0.0214108	0.0221534	0.0260779	0.00283511	-0.00595967	-0.0139988	-0.0177786	0.0193093	0.00273388	-0.0214935	-0.0210936	0.0032989	-0.0111835	0.00534416	0.00259778	0.0111274	-0.0219369	-0.00325055	-0.0158483	0.00796744	-0.000601327	-0.00955872	0.00553405	-0.00272638	0.00411868	0.00146763	0.00876017	0.0034259	0.00154576	0.00192699	0.00494831	0.00404585	0.00402586	-0.00105208	-0.00076294	0.000113021
	Met_39.95%.0	9.45948	7.60884	2.86159	-0.0633216	0.257584	-0.0211984	-0.281113	0.000184679	0.0859928	-0.014489	0.00857603	-0.0236644	-0.0422458	-0.0250209	-0.0515531	-0.0336898	0.0105952	-0.00348608	-0.00876563	-0.0274183	0.0206173	-0.0221137	-0.0117419	0.00502289	0.00382491	-0.0116286	-0.00414718	-0.0118486	0.000110261	-0.00717968	0.0115678	-0.00263454	0.0116788	0.00174444	-0.00995265	0.00586795	-0.00470856	-0.00431387	-0.0028703	-0.00446057	0.000153375	-0.000607925	-0.0024965	-0.00548912	0.00175843	0.000482913	-0.000829414	-0.000196322
	Met_5%.0	5.81907	-4.16117	-1.21368	0.157466	-0.737812	0.641721	-0.243089	-0.0541767	0.0738823	-0.0429255	0.0425859	0.0116084	-0.0443409	-0.0233885	0.0125505	0.0216208	0.00675543	-0.00606391	0.0181631	0.0145781	-0.0189167	0.0177544	-0.00177268	-0.00855325	0.00665118	0.000708414	-0.00305483	0.00788988	0.00394873	-0.00143242	0.00718765	-0.00191708	-0.00641837	0.00082732	-0.00164855	-9.56324e-05	-0.00398064	-0.00637527	0.00223088	0.00379412	-0.00288994	-0.00168765	0.000144591	0.00112398	-1.64753e-05	0.000708933	-0.000139818	-0.00175539
	Met_7.33%.0	6.1948	-3.42209	-0.756641	0.280518	-0.553936	0.348822	-0.0822371	0.0398576	0.0427696	0.0873793	-0.114861	-0.0232866	0.0589415	0.0182089	-0.032266	0.000768087	0.0387132	-0.00277358	-0.0269825	-0.000419311	0.0240204	0.0197945	0.00533786	0.0108703	0.0109971	0.00870298	0.00449775	-0.018468	0.00561109	0.014692	-0.00941983	-0.00237291	0.00992445	-0.00586489	0.00129154	0.00206356	0.00577857	0.0073841	0.000305681	-0.00275514	0.00385737	0.00232371	0.0011903	-0.000852641	8.90707e-05	0.00063125	-0.000146654	0.00226105
	Met_9.66%.0	6.48843	-2.7316	-0.487285	0.292456	-0.484271	0.193972	0.0397143	-0.0777354	-0.00977442	0.00621799	0.0466402	0.0527978	-0.0192058	0.0709749	0.0287412	-0.0194288	-0.0397183	0.00468688	0.00322679	-0.0115953	0.0365586	-0.0507431	-0.0103348	-0.0185229	-0.0147326	-0.0118536	-0.00659947	-0.00377817	-0.00105389	-0.0089836	0.0071643	0.0080715	-0.00158064	0.0119596	-0.00130431	-0.00514729	0.00467463	0.00492599	-0.0028073	-0.00443023	0.00235426	0.000975706	0.00211147	-0.000849507	-0.00197188	-0.00324576	0.00214955	0.000719152
	Contribution of the observations (%):
		F1	F2	F3	F4	F5	F6	F7	F8	F9	F10	F11	F12	F13	F14	F15	F16	F17	F18	F19	F20	F21	F22	F23	F24	F25	F26	F27	F28	F29	F30	F31	F32	F33	F34	F35	F36	F37	F38	F39	F40	F41	F42	F43	F44	F45	F46	F47	F48
	MET_1.961%.0	4.3273	0.017733	0.905619	1.23971	0.0811102	0.0382233	0.838862	0.00137496	2.69221	6.70329	1.1575	0.0153237	0.00183066	2.3962	3.05052	8.41838	1.46223	5.70108	3.20274	0.443655	2.71538	14.3628	0.133698	2.42763	2.52151	0.0551781	2.15567	0.426631	0.0667305	0.073366	0.940448	1.17527	0.169413	1.35238	1.16207	1.45953e-05	3.03529	4.09001	7.91537	1.65298	0.675403	1.14571	0.630673	0.505935	0.0456333	0.35287	0.0386453	5.43754
	MET_16.666%.0	2.0741	0.804589	0.923281	1.58094	5.64104	5.19137	0.294733	1.19043	8.28682	0.829561	15.7845	0.427161	0.987418	3.09476	1.47615	1.24072	0.0471852	1.47342	24.497	0.0244928	3.86457	0.216999	0.559002	0.0159518	0.655694	0.00115858	0.548906	0.00977576	1.25639	0.2331	1.56598	4.92304	2.1331	0.0806418	0.0410911	1.10192	0.000160849	0.915239	0.169402	1.58036	0.00169606	0.012012	0.483626	0.424411	0.397099	0.799015	0.0557381	0.0434247
	MET_2.1739%.0	4.38564	0.0177754	0.6835	1.35733	0.166997	0.0559996	0.224592	0.3665	0.224231	0.534154	1.15269	5.73077	0.282967	0.860972	0.000814536	0.302274	0.00155973	5.27056	0.0133754	8.47477	10.0056	1.20865	6.22824	1.64932	0.889662	0.41959	2.18663	3.04221	4.43573	6.25051	1.0337	0.259768	0.00626442	0.432735	0.139763	2.23784	0.948433	0.00203534	2.84326	0.0959087	2.08988	0.642031	0.053813	0.0783247	7.16624	8.433	0.000991229	5.07159
	MET_2.439%.0	4.25492	0.0238897	0.396164	2.2882	0.0582786	0.14281	0.00155025	4.46605	0.0263649	0.802637	7.7786	3.74762	2.34824	9.78047	0.0082291	0.585025	1.36608	0.0418312	1.03679	2.34467	0.129736	0.0170977	0.192649	0.262986	0.716881	2.92112	0.14848	0.170041	3.33118	0.155379	0.164224	9.66346	0.832852	8.58491	0.00074832	0.0145661	0.022073	0.243588	0.886597	7.09663	7.54348	4.90036	5.79852	0.48039	0.401918	1.58058	0.0027553	0.197578
	MET_2.7777%.0	4.15433	0.0122604	0.340812	1.54454	0.00188421	0.189804	0.250216	0.259021	3.31079	0.236835	1.54596	2.96942	3.18589	2.15374	0.401617	2.27762	4.03697	0.00843975	5.51339	0.638624	3.07877	1.14382	3.64915	15.6697	1.51123	1.4754	8.66152	3.61707	0.916379	0.47135	3.92639	0.256371	1.97141	0.760848	0.00462615	0.0146782	0.00328795	0.59222	0.0692998	0.246588	0.308472	1.67081	1.49431	12.7361	0.00851518	0.0158782	0.535129	0.117725
	MET_3.2258%.0	4.2508	0.00779861	0.498556	0.875735	0.0321211	0.0155241	0.0509759	5.05845	0.12849	2.94038	0.00547856	0.00558071	7.88182	0.0161008	3.17773	1.47663	0.180367	0.10442	0.611276	3.89179	6.44038	0.16655	1.01084	1.37974	0.0037605	0.523648	0.36727	0.631761	4.10975	6.73043	4.12822	0.667108	6.29231	0.665403	0.915572	3.54744	1.09779	0.0122233	5.04646	0.0145703	2.27791	5.20717	3.88024	1.1553	9.94821	0.107857	0.401669	0.0195816
	MET_3.8461%.0	4.35977	0.108207	0.977046	3.98947	0.27194	0.269722	1.28977	0.00219967	0.619107	0.0833147	1.81761	6.31972	0.0307047	0.0623637	6.61075	0.0932204	5.2728	12.5207	0.128824	5.11158	0.306969	0.0057929	3.12161	0.994202	2.5397	0.155642	0.0152088	4.47846	1.35187	0.0635164	3.75078	2.80104	0.761884	9.32208	0.356949	0.291358	2.19996	1.37631	0.127277	0.0118803	7.49726	0.116409	0.0929487	0.0885711	1.46983	0.104859	1.13383	3.4842
	MET_4.762%.0	4.02458	0.00142191	0.237066	0.253371	0.00290945	0.125139	0.150604	4.89338	4.85035	5.73298	1.07726	0.695506	4.52365	0.677283	0.819918	14.1898	5.50308	0.0148596	1.08478	3.17006	0.401974	0.461223	1.30816	1.79424	0.932687	0.0583071	7.62285	0.0480616	3.52467	6.78642	1.93095	6.47121	2.74568	1.65031	2.50119	0.105949	0.00676167	0.747986	0.177317	0.089803	0.206171	0.931558	0.0553673	0.102448	0.00266517	3.74674	0.0514977	1.46903
	MET_6.25%.0	3.35197	0.0140745	0.00805113	0.592604	0.737271	1.34844	3.17207	1.14755	5.10313	0.577961	1.02861	1.14384	0.631767	0.201826	10.1141	0.0796423	2.22111	0.0157176	2.0347	0.0297654	0.20385	4.28204	0.541831	9.09026	2.14631	1.77993	1.26382	0.333209	2.2504	0.0180295	3.60508	1.43665	6.03912	1.16815	4.41934	0.245569	1.79736	0.0134784	0.208449	0.000577664	0.0291806	1.80564	8.75672	0.618911	1.82358	1.81542	6.28482	2.42729
	MET_9.091%.0	3.68244	0.150907	0.00475275	0.511651	0.388961	0.149704	0.67056	1.89438e-08	1.1654	0.616689	0.474569	0.370723	2.7491	0.162418	0.0242137	0.970464	14.9048	0.376111	0.0962239	0.496409	2.98167	0.797132	0.0787404	2.53155	0.380169	6.22028	1.37543	1.62869	2.00028	0.0155187	1.13313	3.30728	9.47674	0.00162949	0.192859	0.170037	4.32293	17.7701	0.0856091	5.22758	0.000634805	0.148308	0.9905	0.660548	0.0985439	1.23414	5.02793	2.13519
	Met_0%	5.51409	0.0272158	0.860976	1.13742	7.01559	0.394723	0.0746385	13.1061	0.0023113	0.322644	0.29089	20.2527	2.92607	3.82871	3.9701	0.105022	0.462124	0.29105	6.78067	0.380364	1.36564	1.15964	0.0687803	3.58954	4.34148	0.650673	4.50162	0.000523753	0.165817	0.0169914	1.6964	2.23021	0.404779	0.0535074	0.0329367	0.0532239	0.00965943	0.0133361	0.28119	0.72786	0.13616	0.46564	1.0362	0.242509	1.60179	2.3818	2.94518	0.0427113
	Met_100%	1.06906	44.1383	33.7379	13.6527	3.72223	0.00525589	0.947005	0.164054	0.0641747	0.00234849	0.133722	0.00658121	0.0105411	0.0178219	0.0005309	0.000233563	0.0109852	0.0816798	0.0022361	0.00448657	0.0275072	0.00738063	0.0195266	0.0594243	2.82181e-05	0.000440901	0.000458093	0.00133241	0.0205658	0.00274122	0.0088391	0.000362543	0.00104972	0.0014313	0.00314144	0.000144334	0.00176531	0.00449466	0.00313089	2.19599e-05	0.000166652	0.000374218	1.63559e-05	0.00434431	0.00741907	0.0110523	0.000123841	2.61067e-06
	Met_1%	5.42548	0.00158145	1.43022	0.100224	4.8796	0.57208	0.761436	2.41436	0.00482061	7.77588	1.11825	0.612254	17.2106	6.34028	0.826799	1.33673	0.566213	2.79465	1.36668	0.56134	12.1379	3.6197	0.0357371	1.21847	1.88601	0.201474	1.59233	0.44498	0.4737	1.88792	0.676286	0.000367308	0.0710483	1.23363	0.884129	0.360766	0.341879	3.69416	0.0512713	1.55446	0.0102784	1.91896	0.253499	0.621223	1.46026	2.02494	1.90254	1.3018
	Met_5	4.83021	0.00526311	0.200869	0.00252486	2.10823	0.693927	0.160303	3.88989	0.1031	7.84861	0.280297	6.92959	0.0167335	0.513342	3.65633	6.21796	0.182678	0.217182	1.20995	0.690105	0.1719	0.159431	0.314605	2.34579	1.17041	0.0642817	1.0313	0.357168	5.85595	0.0244773	6.95275	0.637737	0.375132	9.60036	9.96144	1.46853	0.311091	7.27886	1.82112	0.0346056	0.0964267	1.13078	0.00151814	3.06728	0.019686	0.451709	1.92808	1.56968
	Met_10%	4.44354	0.421739	0.142763	4.93531	0.0736146	0.421898	3.37335	0.674291	1.96695	1.33396	2.92882	0.321406	8.1198	7.31664	2.02177	1.75362	4.851	6.52248	0.0274307	3.14759	13.9768	3.27933	2.44925	0.07894	0.457748	4.61903	1.55349	0.800871	3.37829	0.0473757	0.0437879	0.256536	0.0223952	3.12016	0.434045	1.74402	1.24499	0.34919	1.61333	0.107958	0.140111	0.846052	0.111976	0.361448	0.528978	0.0501478	0.607286	0.937707
	Met_20%	3.42082	1.60912	1.58932	19.1791	1.86083	0.713263	0.065359	2.6336	14.1049	3.35025	2.64363	0.106832	0.00198239	2.77223	0.00336222	8.29215	1.51581	3.09512	0.766625	1.41813	0.0570677	1.81785	0.687609	0.000317629	0.189943	4.83091	0.00979365	2.32252	0.113774	0.188179	0.0873439	3.87715	1.23453	0.375179	5.20448	0.227147	0.188395	0.0233773	0.0116632	2.10641	2.91804	0.149054	0.645187	0.0703722	0.265095	0.62648	0.00814191	0.58073
	Met_30%	2.50065	3.60756	5.6336	29.8192	2.82616	0.151667	0.00460238	1.74715	2.45302	4.53915	0.64322	0.0597425	5.44118	0.399358	2.22266	3.17035	2.56694	7.14306	6.99623	0.894337	3.51417	0.0276581	0.0069977	1.74696	1.29083	0.018929	0.375815	0.668466	1.68856	5.08286e-05	0.0651717	0.619578	0.381721	0.0135236	1.78874	0.338151	0.0961485	0.0288041	0.304159	0.90875	0.639619	0.0152293	0.0149243	0.00124978	0.0125356	0.0454566	0.00680787	0.520343
	EtH_7.33%.0	0.897412	1.90122	1.08099	0.312205	2.77252	5.5747	0.88859	3.64408	0.0708647	0.00131382	0.083306	3.79418	2.49435	6.80853	4.7436	1.93016	0.559297	6.45519	0.0345946	5.93308	0.503255	0.847092	0.359056	1.62941	1.10775	0.225798	0.157006	0.845902	7.07264	0.00226367	1.85286	3.6141	4.40831	1.7416	0.372613	0.16063	2.49975	0.012852	1.90618	2.1882	0.112784	4.7205	1.86639	5.4936	2.35249	0.0307879	1.4615	0.433658
	EtOH_11.99%.0	0.761806	1.77667	0.997834	0.050256	0.963938	3.71069	0.865004	0.0571607	0.0346667	3.03954	0.069755	0.0761051	1.0626	4.79657	3.48198	0.916668	0.187987	4.52405	0.731609	4.57129	4.56493	2.88912	0.627327	1.0259	4.03758	3.51042	5.10796	0.676766	2.04899	4.88391	0.223239	0.280604	0.0774507	4.42379	0.004476	0.612219	6.98925	0.442341	5.95899	1.51957	3.42829	1.12664	3.32941	0.187289	0.121322	1.15923	0.00036585	6.02563
	EtOH_14.32%.0	0.698826	1.73997	0.958056	0.00706377	0.531847	2.70271	0.906591	0.000442265	0.24011	0.60297	0.260023	1.38826	0.182216	1.65247	0.0323472	3.59797	4.80637	0.467249	0.0935806	6.11021	0.228827	0.137757	0.105744	5.68129	1.57743	0.212384	1.17364	0.405215	1.3828	0.418604	1.49137	0.997999	4.68259	0.00297804	8.02041	1.59064	2.49841	0.70252	0.717263	1.01147	0.176866	0.866397	16.0092	1.88911	2.10386	0.0270178	10.0998	6.76836
	EtOH_16.65%.0	0.627805	1.57613	0.835079	0.0234006	0.0611056	2.21348	0.583851	3.56852	0.124261	9.79099	2.38587	1.58942	2.40308	0.058278	0.00106688	0.542699	1.47069	0.712172	0.0594499	0.282636	0.0785755	4.24961	2.60407	0.0533399	2.3292	0.373813	3.53898	2.23	1.01598	12.0819	0.15061	0.361339	4.08563	0.0302285	5.98351	0.0936885	0.356856	4.27988	1.81105	13.117	3.08694	5.97436	0.0413834	0.0279214	0.174046	0.485763	0.424955	0.00855414
	EtOH_18.98%.0	0.619714	1.48561	0.64032	0.0151805	0.120989	0.928811	0.00869284	0.0295482	2.09807	0.0133047	0.661453	0.291859	0.552493	0.319592	6.23425	0.164681	1.21714	1.23799	1.08775	2.70702	1.53077	0.0405675	1.7686	0.133016	1.33859	4.01707	0.830999	5.47344	0.0372908	1.24791	0.00353882	2.48219	2.1262	2.41707	2.99095	0.229485	0.0601893	2.97779	21.5391	3.06995	7.14679	3.23972	1.44944	0.21404	6.27736	4.41444	0.0317138	0.436467
	EtOH_21.31%.0	0.509965	1.38446	0.666523	0.191214	0.377942	0.8779	0.0214163	0.0827406	0.0716142	0.134702	1.66281	1.49676	0.00908279	0.00161283	0.15731	1.5249	7.5511	1.70942	2.77268	0.00331851	0.00587702	5.24291	7.88801	0.890837	1.90819	1.48829	1.39004	8.00735	4.52633	0.21809	0.0209154	2.27643	8.47791	0.425108	0.112236	0.0668062	5.71866	4.16803	0.0174511	0.694564	3.70632	6.65322	3.52524	5.14154	0.413175	3.28007	0.363772	0.124327
	EtOH_23.64%.0	0.464	1.28829	0.644284	0.365037	1.41347	0.562113	0.223099	0.18612	2.02833	0.35481	0.476654	5.51265	0.645059	0.312273	2.13045	2.44919	0.180851	0.0190771	0.000905166	1.74599	1.69135	2.28532	2.05402	0.228681	6.32145	14.9613	0.567002	1.85474	5.30775	4.4242	0.00496186	0.560092	0.00607073	0.318903	0.500483	0.735179	1.80446	1.15097	4.99944	0.546017	2.51238	9.39565	1.56239	0.191632	2.24729	3.46532	4.62398	2.63547
	EtOH_25.97%.0	0.399688	1.14622	0.534452	0.556974	2.35312	0.312236	0.0126851	0.63734	0.000938218	1.05589	2.17777	2.89772	0.0972152	0.568898	1.62706	0.0717051	4.67004	1.33218	0.672622	0.0437606	1.53099	0.346627	0.0992333	1.39204	0.408107	8.96462	19.4059	0.998912	0.378315	2.10554	0.14295	3.04706	0.0788569	0.0664999	2.56964	0.0167524	13.8904	0.0359376	0.444675	0.01646	0.325523	0.2151	7.4288	1.03319	0.154615	0.193087	2.88753	8.61325
	EtOH_28.3%.0	0.325579	1.08999	0.473085	0.553178	2.30455	0.118045	0.000772992	1.98744	0.000959451	1.52979	0.15311	0.0755085	0.466226	0.773037	2.99472	0.12433	11.0066	0.0185529	0.478791	2.2843	0.380439	0.0954362	0.981264	11.0586	0.467452	1.47385	1.82317	0.188602	0.100808	0.272578	2.68162	4.11117	0.333461	0.000850997	1.00149	13.9978	0.850438	0.555575	0.784114	1.5187	3.81729	0.223905	0.586669	6.61319	2.9541e-05	9.94154	0.91794	6.42259
	EtOH_30.63%.0	0.292043	1.06212	0.520017	0.989898	3.91684	0.00432141	0.0102774	0.290914	0.00161647	2.7675	0.0700387	4.08112	2.07067	2.9325	4.69441	2.25128	0.0500492	4.70698	6.7295	0.120609	1.67636	0.10083	12.6153	0.39589	0.170758	0.313657	0.239038	0.091405	0.00692827	1.17686	3.13027	0.275742	3.645	1.27201	6.30408	1.4527	8.31999	0.180683	0.0239434	6.98862	2.17141	7.44664	0.0230774	1.0367	1.01091	0.0596337	0.0167774	0.251325
	EtOH_32.96%.0	0.243713	1.0527	0.709997	1.78282	4.60909	0.105094	0.183863	7.36759	0.101205	0.130269	0.00855854	0.325705	1.6281	1.22622	0.112547	0.964348	2.8597	5.12931	0.155579	0.408281	1.30579	3.97253	0.404186	3.33727	0.0239354	1.81589	0.0529618	0.500528	1.02841	0.608992	1.85051	0.235925	4.34146	9.36931	5.29238	9.39136	1.36566	8.32396	0.0953248	0.0365791	1.20208	0.0919187	2.21352	0.0858237	11.7684	0.102328	0.0115137	0.0259112
	EtOH_35.29%.0	0.162135	0.923867	0.674109	2.24632	5.80388	0.0834616	1.12145	1.59135	1.31338	1.73858	3.87082	1.29912	1.91737	0.765896	0.000901903	1.20797	0.489902	0.00192447	0.204553	9.18099	0.49608	0.640212	1.16401	5.72999	1.20558	1.84277	0.724014	2.89909	0.0566046	0.367807	0.371573	1.75801	0.00214869	5.08991	0.0111345	0.790381	3.40349	3.59438	0.00024607	0.373237	0.118869	7.14755	2.90565	0.319855	0.0760823	20.194	1.20113	0.877442
	EtOH_37.62%.0	0.11819	0.744309	0.395724	1.8102	6.89668	0.277619	0.776453	0.100414	6.99522	4.6401	6.62954	0.931852	3.82451	0.487584	8.80224	5.27097	0.981676	2.34116	1.28655	2.28557	1.9684	1.34318	5.75527	0.382784	0.143923	2.43458	3.16186	0.328565	0.0490331	1.77482	6.30898	0.134449	0.243578	0.519448	0.260806	0.375365	0.838693	0.320586	0.324053	0.54343	2.34455	3.66579	9.58525e-05	3.82291	4.38743	0.229739	0.0285006	0.671831
	EtOH_39.95%.0	0.105926	0.685527	0.151691	1.4893	15.1908	0.179017	6.09556	4.01244	10.1282	0.392895	0.151777	0.0857822	1.90779	2.09772	2.50241	0.526747	1.13246	0.0250433	2.13877	3.54295	2.1055	0.344077	2.71355	0.0891234	0.472469	5.07696	0.19903	4.32142	0.38386	7.77009	2.56043	0.349152	0.0608389	0.0374443	0.342768	0.375101	3.42577	0.00427641	1.17808	1.8578	0.0155387	0.00715038	0.0524267	1.15378	1.18012	3.57945	0.103771	5.65643
	EtOH_5%.0	0.940692	2.04358	1.27035	0.52934	5.35949	7.21932	1.85284	0.32335	1.01236	3.21815	0.899584	1.77939	0.4401	2.55652	0.0973298	0.365164	1.23231	0.138329	1.46545	0.431956	0.51445	0.193032	8.48957	0.0584658	6.65145	0.958405	1.42455	0.112963	0.0680504	8.3206	0.0213577	3.86406	0.973778	1.04819	0.878714	7.91877	0.0866391	0.398479	8.8824e-05	0.177893	2.94667	6.55801	0.201354	5.69453	0.814699	5.57109	0.370816	0.4669
	EtOH_9.66%.0	0.834532	1.91316	1.15918	0.0691393	1.63699	4.64664	1.94831	0.172399	0.607022	0.430824	1.46331	0.166401	3.02094	4.38763	1.78241	1.74929	0.789489	1.70317	0.847931	2.47737	1.31569	2.66419	2.86288	0.913447	1.35038	0.0379065	1.6707	19.6312	3.44481	0.558062	0.507712	1.6681	0.776984	2.38397	1.01833	3.6654	1.82923	2.01264	0.900333	0.0198177	6.33805	0.107675	1.12676	3.03147	2.45118	0.0462182	1.49923	2.32072
	Met_11.99%.0	1.25071	0.453137	0.00126119	0.964524	0.566548	1.77229	8.4053	0.545079	2.91946	0.103784	0.451698	1.2086	0.126841	0.670303	1.13618	5.7936	0.828651	3.25731	0.1014	1.38877	0.0135433	0.113791	2.13798	4.99538	6.97959	0.25036	2.67987	0.435846	10.8427	0.527864	1.30924	1.86746	0.00479236	0.659214	7.47599	0.689118	0.349865	2.58729	5.96267	0.0262696	1.50583	0.284851	2.08794	4.0359	0.289624	0.180327	6.1667	1.55373
	Met_14.32%.0	1.3034	0.156954	0.0933432	0.954662	0.99739	0.645736	4.11663	1.01529	2.25181	0.0711261	0.126054	0.0227858	0.419789	1.07924	0.398987	1.55687	0.00414341	0.534879	0.0764091	2.23771	1.40812	3.92142	5.42484	1.19857	4.96277	1.74076	0.0108937	11.1233	0.123326	0.147324	16.82	0.119663	0.247434	0.107639	3.4211	5.41978	1.26469	0.00813158	0.297938	3.86512	0.0121813	7.40483	0.340355	3.06492	0.246752	0.159044	4.80203	2.23305
	Met_16.65%.0	1.39172	0.0297312	0.187616	0.603212	0.719588	0.315131	9.20631	15.2452	0.897467	4.64751	0.0558974	1.42529	0.843618	0.320155	0.0254702	0.476988	0.0397651	4.34772	0.700239	0.716194	0.0203506	1.69741	8.86205e-05	0.848637	2.17932	0.112843	0.586091	0.00381964	3.91579	1.0105	1.25612	5.37404	0.769966	0.274526	5.25277	8.49177	3.87098	1.61003	0.426437	3.1674	0.0426471	0.00239478	2.24538	2.14365	4.93142	1.95245	1.70446	1.87313
	Met_18.98%.0	1.46658	0.00230602	0.594845	0.752619	0.597318	0.0977781	3.58126	4.48614	9.1971	1.84574	7.10821	4.26888	0.180992	0.605356	0.376227	0.150883	1.64037	2.67162	3.78584	0.475402	0.0745671	1.63288	2.97846	0.132385	1.25301	1.15833	1.19883	0.251354	0.0867801	0.0021887	0.437074	6.37116	0.96879	1.32119	9.18894	0.250106	1.73883	0.524359	2.32817	1.76873	4.24797	2.11223	1.20575	1.50778	7.43995	0.894116	0.202821	2.79697
	Met_21.31%.0	1.56992	0.122048	1.1805	0.564613	0.30268	0.0103059	4.02669	0.869517	0.608016	6.99588	3.18611	0.044404	1.59657	5.91834	4.11668	0.0979356	0.345731	6.76059	3.79226	0.23999	2.22541	0.246384	0.116201	0.16092	8.45051	2.24768	0.131131	1.27531	0.0437896	0.122818	8.48355	0.982518	8.31403	0.045741	0.489665	0.93769	0.407535	0.963279	8.69366	0.0370263	0.958939	0.2821	0.148	1.19101	0.0214005	0.833957	7.00003	0.800133
	Met_23.64%.0	1.68263	0.30832	1.44447	0.245671	0.0520837	5.45843e-05	3.63872	0.615983	1.21151	2.91862	0.145157	5.19795	4.3962	0.00618608	0.0535619	2.28318	0.314585	0.0650084	0.140953	0.139796	0.0515683	0.229357	0.104363	1.31102	9.14978	0.40907	1.43914	0.469521	1.30181	1.5162	0.173437	2.66794	1.85813	5.58498	0.145679	3.00947	3.9764	2.23269	0.182308	6.75503	0.925296	0.716967	4.18891	3.99498	2.94074	1.17172	16.4965	0.09555
	Met_25.97%.0	1.76502	0.66533	2.18204	0.208115	0.0233483	0.0169551	3.037	0.318461	0.589684	1.73915	4.92717	5.91778	1.08922	5.78092	4.28505	11.024	0.129853	0.0601719	2.36977	11.2478	0.168632	0.145411	0.0106522	1.75494	0.657757	0.027741	0.351191	0.00212836	0.829379	3.21474	4.15378	1.30349	0.5749	3.90997	0.077126	4.86881	1.50164	0.186756	0.64041	0.0631731	6.82762	0.369964	1.91936	0.277682	1.55717	0.317489	4.04081	0.829584
	Met_28.3%.0	1.77191	0.886879	2.49832	0.213034	0.132273	0.0225054	0.467887	0.294423	4.04699	0.127338	0.0972755	0.0288804	0.551051	1.17684	0.620824	0.0346897	1.85181	1.3409	3.73385	0.0337173	0.756951	4.84097	6.568	0.249027	3.56139	14.0642	8.50377	0.448955	0.0576711	2.83084	0.621462	0.00154367	5.04109	0.20826	0.317282	2.40896	1.74367	0.00490606	0.0087535	7.51425	2.64336	1.37392	0.0991504	2.80653	1.38818	5.06446	4.858	0.0422704
	Met_30.63%.0	1.95724	1.67166	3.69577	0.0921926	0.0647775	0.0569644	0.914232	0.57493	1.38856	0.515245	2.77325	0.000900975	1.18789	0.177279	0.366948	0.0205294	0.0512247	1.34545	4.82694	2.19592	0.0245514	0.000895545	0.0613194	1.77149	2.21646	0.00242739	3.29091	2.63849	11.1359	7.57285	0.021073	4.97538	5.20036	0.13053	0.614319	2.16402	3.24789	1.6223	0.00504633	0.216384	11.7354	4.06357	1.06856	3.85482	1.09928	3.12744	0.246718	1.97289
	Met_32.96%.0	2.03021	2.57828	4.71456	0.0257161	0.113726	0.0415561	0.301567	2.3269	0.0308097	0.33551	0.915603	0.102096	0.233939	1.11957	0.0261633	0.00344031	0.0500296	2.03524	0.694005	0.0198997	0.210464	7.68525	2.72717	2.08721	1.49707	0.299776	3.4581	5.51917	0.103637	3.1773	0.815452	5.19254	0.555018	7.32464	0.0706865	13.6401	2.63406	0.166971	2.4203	1.7235	0.290763	0.950377	3.61049	0.230843	4.32759	0.56988	0.053914	8.91804
	Met_35.29%.0	2.15528	3.9753	6.25475	0.00146334	0.382451	0.0652748	2.17391	2.33498	0.0640831	0.0131285	4.75583	2.10372	0.012187	0.306129	0.82967	0.0493409	0.514425	0.459063	0.17595	1.81219	1.06814	0.602176	5.19775	2.82298	3.499	4.26065	2.32727	0.0251995	0.647264	3.71317	0.27706	3.2237	0.00153729	0.153226	2.78322	0.132177	0.00832531	7.3182	4.14058	5.73712	0.0134029	0.474553	5.89615	1.47136	4.63185	0.709145	4.59934	3.78553
	Met_37.62%.0	2.22266	4.89989	6.24389	0.0804083	0.315021	0.0812267	9.75569	0.720592	0.163204	0.188834	0.282837	0.383711	0.585805	0.872277	1.26611	0.0175449	0.107454	0.662324	1.18386	1.4291	0.0351068	2.26554	2.32861	0.0917933	1.06517	0.279379	0.0796315	1.86311	8.23814	0.204061	5.48733	1.45516	0.0119573	4.26324	1.45632	0.470203	1.49133	0.252867	9.85676	2.24167	0.519105	0.955507	7.06742	6.07527	7.22124	0.732805	0.476351	0.0116687
	Met_39.95%.0	2.35362	7.03385	8.30974	0.0258043	0.665223	0.0447195	12.1646	1.48035e-05	3.35074	0.138695	0.0609041	0.527136	2.28062	1.11271	4.94807	2.47747	0.339618	0.0410736	0.287787	2.88144	1.99662	2.39816	0.721562	0.212804	0.124598	1.3228	0.202948	2.11246	0.000208124	0.995534	2.92342	0.159104	4.51037	0.141989	4.71031	2.17814	1.9491	2.18469	1.05819	3.80018	0.00511069	0.0950987	1.79892	11.1828	1.37768	0.154392	0.562975	0.0352077
	Met_5%.0	0.890652	2.10371	1.49478	0.159574	5.45784	40.9809	9.09633	1.27396	2.47342	1.21734	1.50178	0.126846	2.51243	0.972249	0.293257	1.02036	0.138065	0.124277	1.23562	0.814572	1.68083	1.54586	0.0164457	0.617071	0.37676	0.00490918	0.110116	0.936687	0.266926	0.0396268	1.12867	0.0842467	1.36226	0.0319365	0.129235	0.000578525	1.39304	4.77149	0.639236	2.74944	1.81445	0.732895	0.00603433	0.468879	0.000120937	0.332734	0.0159982	2.81479
	Met_7.33%.0	1.00938	1.42278	0.580968	0.506419	3.07644	12.1087	1.04105	0.689528	0.828872	5.04429	10.9249	0.51044	4.43945	0.589306	1.93828	0.00128775	4.53413	0.0259996	2.72691	0.000673907	2.71014	1.92152	0.149117	0.99668	1.02997	0.740919	0.238709	5.13207	0.538979	4.16877	1.93856	0.129073	3.25706	1.60494	0.079321	0.269369	2.93561	6.40105	0.0120018	1.44981	3.23259	1.38943	0.40894	0.269822	0.0035348	0.263809	0.0176008	4.67004
	Met_9.66%.0	1.10734	0.906547	0.240956	0.550438	2.35129	3.74425	0.242789	2.62281	0.0432911	0.0255436	1.80134	2.624	0.471358	8.95331	1.53793	0.823958	4.77262	0.0742428	0.0389982	0.515342	6.27784	12.6273	0.558985	2.89396	1.84853	1.37448	0.513921	0.214792	0.0190138	1.55864	1.12135	1.49342	0.0826189	6.67381	0.0808977	1.67598	1.92111	2.84868	1.01225	3.74865	1.20414	0.24497	1.28682	0.267843	1.73244	6.97462	3.78132	0.472436
	Squared cosines of the observations:
		F1	F2	F3	F4	F5	F6	F7	F8	F9	F10	F11	F12	F13	F14	F15	F16	F17	F18	F19	F20	F21	F22	F23	F24	F25	F26	F27	F28	F29	F30	F31	F32	F33	F34	F35	F36	F37	F38	F39	F40	F41	F42	F43	F44	F45	F46	F47	F48
	MET_1.961%.0	0.992297	0.000880345	0.00538268	0.00116187	4.87946e-05	2.31668e-06	3.28686e-05	1.91067e-08	3.58359e-05	6.1197e-05	8.43087e-06	9.8188e-08	8.64067e-09	8.13157e-06	9.88263e-06	2.32618e-05	2.91518e-06	1.01741e-05	5.15754e-06	6.98139e-07	3.48679e-06	1.76648e-05	1.54083e-07	1.73594e-06	1.78574e-06	3.40219e-08	1.10187e-06	1.71011e-07	2.35111e-08	2.29126e-08	2.59637e-07	3.09236e-07	3.09001e-08	1.74817e-07	1.47397e-07	1.39164e-12	2.08242e-07	2.10132e-07	3.71696e-07	5.22e-08	1.87508e-08	2.68551e-08	1.3179e-08	8.22193e-09	6.1775e-10	3.21479e-09	2.84824e-10	3.59027e-08
	MET_16.666%.0	0.903224	0.075855	0.0104214	0.00281379	0.0064446	0.00059753	2.19311e-05	3.14152e-05	0.000209478	1.43824e-05	0.000218335	5.19788e-06	8.85077e-06	1.99443e-05	9.08176e-06	6.5107e-06	1.78647e-07	4.99351e-06	7.49159e-05	7.31941e-08	9.42404e-06	5.06836e-07	1.22345e-06	2.16622e-08	8.81861e-07	1.35662e-09	5.32826e-07	7.44154e-09	8.40647e-07	1.38249e-07	8.2103e-07	2.45995e-06	7.38865e-07	1.97964e-08	9.89788e-09	1.99528e-07	2.09568e-11	8.92985e-08	1.51069e-08	9.47764e-08	8.94209e-11	5.34696e-10	1.91924e-08	1.3098e-08	1.02087e-08	1.3824e-08	7.80139e-10	5.44506e-10
	MET_2.1739%.0	0.993631	0.000871881	0.00401384	0.00125687	9.92598e-05	3.35343e-06	8.69464e-06	5.03197e-06	2.94899e-06	4.8181e-06	8.29528e-06	3.62806e-05	1.3196e-06	2.88674e-06	2.60721e-09	8.25243e-07	3.07232e-09	9.29314e-06	2.12812e-08	1.31763e-05	1.26942e-05	1.46871e-06	7.09193e-06	1.16526e-06	6.22516e-07	2.55613e-07	1.10431e-06	1.20484e-06	1.54412e-06	1.92869e-06	2.81964e-07	6.75314e-08	1.12892e-09	5.52682e-08	1.75151e-08	2.10819e-07	6.42897e-08	1.03317e-10	1.31917e-07	2.99246e-09	5.73251e-08	1.48688e-08	1.11105e-09	1.25761e-09	9.58493e-08	7.59081e-08	7.21806e-12	3.30854e-08
	MET_2.439%.0	0.993947	0.00120817	0.0023987	0.00218463	3.57152e-05	8.81746e-06	6.18783e-08	6.32219e-05	3.57506e-07	7.46465e-06	5.77166e-05	2.44623e-05	1.12909e-05	3.3811e-05	2.71581e-08	1.64678e-06	2.77442e-06	7.60479e-08	1.70083e-06	3.75861e-06	1.69709e-07	2.14217e-08	2.26176e-07	1.91573e-07	5.17193e-07	1.8348e-06	7.73146e-08	6.94341e-08	1.19562e-06	4.94333e-08	4.61867e-08	2.5902e-06	1.54749e-07	1.1305e-06	9.66915e-11	1.41484e-09	1.54268e-09	1.27489e-08	4.24122e-08	2.28298e-07	2.13342e-07	1.17011e-07	1.23436e-07	7.95282e-09	5.54262e-09	1.46691e-08	2.06869e-11	1.32896e-09
	MET_2.7777%.0	0.995545	0.000636077	0.00211692	0.00151277	1.18457e-06	1.2022e-05	1.02457e-05	3.76155e-06	4.60549e-05	2.25956e-06	1.17676e-05	1.98839e-05	1.57147e-05	7.63802e-06	1.35971e-06	6.57705e-06	8.41086e-06	1.574e-08	9.27844e-06	1.05021e-06	4.1315e-06	1.47015e-06	4.39501e-06	1.17098e-05	1.11847e-06	9.50685e-07	4.62676e-06	1.51518e-06	3.37411e-07	1.53836e-07	1.13282e-06	7.0495e-08	3.75773e-07	1.02782e-07	6.13209e-10	1.46258e-09	2.35737e-10	3.17971e-08	3.40082e-09	8.13785e-09	8.94968e-09	4.09274e-08	3.26328e-08	2.16297e-07	1.20465e-10	1.51173e-10	4.12167e-09	8.12322e-10
	MET_3.2258%.0	0.995537	0.000395411	0.00302642	0.000838247	1.97355e-05	9.60956e-07	2.03994e-06	7.1792e-05	1.74679e-06	2.74162e-05	4.07549e-08	3.65212e-08	3.79951e-05	5.58033e-08	1.05143e-05	4.16723e-06	3.67255e-07	1.90319e-07	1.00536e-06	6.25473e-06	8.44634e-06	2.09206e-07	1.1898e-06	1.00766e-06	2.71998e-09	3.29756e-07	1.91732e-07	2.58634e-07	1.47886e-06	2.14676e-06	1.16401e-06	1.79271e-07	1.17216e-06	8.78481e-08	1.18606e-07	3.45454e-07	7.69219e-08	6.41387e-10	2.42028e-07	4.6993e-10	6.45884e-08	1.24656e-07	8.28129e-08	1.91751e-08	1.37543e-07	1.00358e-09	3.02349e-09	1.32049e-10
	MET_3.8461%.0	0.984939	0.00529231	0.00572124	0.00368361	0.000161172	1.61055e-05	4.97881e-05	3.01145e-08	8.11889e-06	7.49352e-07	1.30429e-05	3.98945e-05	1.42779e-07	2.08499e-07	2.10995e-05	2.53774e-07	1.03565e-05	2.20134e-05	2.04381e-07	7.92455e-06	3.88339e-07	7.01918e-09	3.54431e-06	7.00404e-07	1.77199e-06	9.45451e-08	7.65883e-09	1.76857e-06	4.69252e-07	1.95428e-08	1.02018e-06	7.26096e-07	1.36906e-07	1.18719e-06	4.46047e-08	2.73692e-08	1.48697e-07	6.96639e-08	5.88827e-09	3.69616e-10	2.0506e-07	2.68819e-09	1.91356e-09	1.41806e-09	1.96028e-08	9.41164e-10	8.23283e-09	2.26647e-08
[truncated: 43 more rows]
[truncated: 51 more columns]

[truncated: 12 more sheets: SCA DATA, SCA_HID1, PCA_HID3, PCA_HID4, PCA_HID5, SCA_HID2, SCA1_HID1, SCA2_HID1, Fig.9 PCA SCA, UV Vis Spectra data, FTIR Spectra data, SCA2_HID]
